# Supplementary material for: Profiling sensory neuron microenvironment after peripheral and central axon injury reveals key pathways for neural repair
Source: eLife. 2021 Sep 29;10:e68457. doi: 10.7554/eLife.68457 (PMC8480984; doi:10.7554/eLife.68457)
Supplement: Figure 1—source data 1. [file elife-68457-fig1-data1.xlsx]

## Sheet: scRNAseq  data
% cells per cluster
condition	Connective Tissue	Endothelial	Macrophages	Mesenchymal	Neurons	Pericytes	Schwann cells	SGC	Smooth Muscle Cells	T-cells	N/A
NAÏVE	8	5	13	4	1	4	5	55	3	1	2
SNC	13	3	30	1	1	4	4	38	4	0	3
DRC	15	7	22	3	1	6	3	37	3	1	2
SCI	11	5	19	5	2	3	3	42	4	1	5
#cells per cluster
condition	Connective Tissue	Endothelial	Macrophages	Mesenchymal	Neurons	Pericytes	Schwann cells	SGC	Smooth Muscle Cells	T-cells	N/A
NAÏVE	478	332	794	226	52	274	284	3460	219	20	112
SNC	605	149	1417	65	49	174	177	1787	175	10	120
DRC	1107	491	1555	217	46	459	176	2679	230	41	177
SCI	781	385	1313	288	110	221	228	2979	274	96	322
FDR<0.05, FC>2
DE genes	SGC	Macrophages	Schwann cells	Pericytes	Endothelial
SNC	482	682	1271	957	1276
DRC	171	460	689	568	630
SCI	65	75	249	256	231
top genes	Connective Tissue	Endothelial	Macrophages	Mesenchymal	Neurons	Pericytes	Schwann cells	SGC	Smooth Muscle Cells	T-cells	N/A
1	SAA1	CLDN5	LY86	MFAP4	GAL	KCNJ8	NCMAP	FABP7	PLN	CAMP	KCNJ13
2	SAA2	LY6C1	PF4	SFRP4	TAC1	ACE2	SLC36A2	BCAN	FBXL22	NGP	1700007K13RIK
3	CDKN2A	SOX17	CCL12	SLC47A1	PRPH	ADRA2A	FAM178B	RP24-247B20.1	TCF15	S100A8	RSPH1
4	OSR2	GPIHBP1	BCL2A1B	COMP	ELAVL4	ABCC9	CLDN19	MMD2	ACTA2	S100A9	LY6H
5	LUM	SLCO1A4	C1QC	SLC4A10	SCG2	COLEC11	MLIP	ACSBG1	MYH11	LTF	CALB1
6	A2M	GRRP1	CCL4	H19	STMN2	TRPC6	PRX	LRRTM1	KCNA5	1100001G20RIK	GM867
7	CCL11	PLVAP	CD74	IGF2	RPRM	KCNE4	PMP2	DHRS2	TAGLN	RETNLG	TEKT1
8	APOD	FLT1	C1QA	PROK2	TRPV1	RGS5	KCNK1	TEX40	MAP3K7CL	LCN2	ODF3B
9	6030408B16RIK	RBP7	MS4A6C	DIO2	EEF1A2	AGTR1A	IL17B	GM2115	TESC	LY6G	KRT19
10	CDKN2B	ELTD1	CTSS	NOV	ISL1	PLA1A	OTOP1	LECT1	NTF3	MMP8	1700009P17RIK
