# Supplementary material for: Profiling sensory neuron microenvironment after peripheral and central axon injury reveals key pathways for neural repair
Source: eLife. 2021 Sep 29;10:e68457. doi: 10.7554/eLife.68457 (PMC8480984; doi:10.7554/eLife.68457)
Supplement: Figure 3—source data 1. — Image analysis of DRG sections, qPCR raw data. [file elife-68457-fig3-data1.xlsx]

## Sheet: Mac markers
gene	% expressing cells			z-score	NAI	SNC	DRC	SCI
Retnnla	3.33778			CD86	1.21418	-1.06317	-0.513701	0.362688
Clec10a	21.2283			CD80	-0.649141	-0.782018	1.40222	0.0289379
Folr2	7.20961			TLR2	1.29832	-1.00698	-0.504777	0.213445
Timd4	1.86916			ARG1	-0.509175	-0.483495	1.4999	-0.507227
Cbr2	39.1188			CD163	0.0197466	-1.12628	-0.194701	1.30123
Mgl2	81.976			CCL2	1.21556	-1.03505	-0.556521	0.376013
Teme119	25.9012			IL6	0.149198	1.22819	-1.19894	-0.178449
P2ry12	28.1709			IL12A	-0.248073	1.39749	-0.977762	-0.171654
Trem2	63.2844			IL12B	-0.550319	1.49854	-0.442639	-0.505578
ccl12	54.7397			IL23A	1.48701	-0.331198	-0.503225	-0.652587
Gpr34	54.4726			TNF	0.91192	-0.540854	-1.13607	0.765002
Gpr183	45.3939			IL1B	1.0527	-1.33511	-0.0451204	0.327521
Hexb	100			IL10	-0.896824	-0.822663	0.717237	1.00225
Mef2c	58.0774			TGFB1	1.0135	-1.11193	-0.555597	0.654025
st3gal6	51.1348			IL1RN	-1.45147	0.512063	0.161662	0.777746
Tagap	20.0267			IL1A	-0.793975	-0.279258	-0.389587	1.46282
CD68	87.1829			MKI67	-0.680731	1.72493	-0.611729	-0.432465
EMR1	73.9653			CDK1	-0.580701	1.72605	-0.455135	-0.690213
AIF1	93.992			TOP2A	-0.751528	1.46305	-0.499926	-0.211593

## Sheet: Macrophage DEG
Mac DE	Feature ID	Total counts	P-value (DRC vs. NAI)	FDR step up (DRC vs. NAI)	Ratio (DRC vs. NAI)	Fold change (DRC vs. NAI)			Feature ID	Total counts	P-value (SCI vs. NAI)	FDR step up (SCI vs. NAI)	Ratio (SCI vs. NAI)	Fold change (SCI vs. NAI)			Feature ID	Total counts	P-value (SNC vs. NAI)	FDR step up (SNC vs. NAI)	Ratio (SNC vs. NAI)	Fold change (SNC vs. NAI)
	ARG1	313375	1.45721e-41	4.70189e-40	88.2049	88.2049			SAA3	305698	0.000919012	0.0123762	191.934	191.934			LY6I	94441.8	1.16793e-05	9.30661e-05	21.4886	21.4886
	CLEC4D	129014	1.11608e-34	3.27817e-33	11.5002	11.5002			CLEC4D	129014	0.000226632	0.00361997	5.65396	5.65396			IL12B	36535.9	0.00156645	0.00749	13.4829	13.4829
	NXPE5	367853	2.89622e-36	8.73908e-35	9.20111	9.20111			IL1A	70406.7	0.00296186	0.0331466	4.91115	4.91115			NXPE5	367853	1.716e-47	6.00839e-46	10.025	10.025
	SAA1	30156.5	4.02584e-33	1.15186e-31	9.13236	9.13236			MPZ	3.6775e+06	2.86954e-11	9.7952e-10	3.95201	3.95201			TNFRSF4	18187.7	0.00211582	0.00974778	7.51583	7.51583
	TREM1	52018.1	4.71472e-11	5.53925e-10	7.94924	7.94924			PLP1	2.17398e+06	1.67515e-08	5.1513e-07	3.02155	3.02155			CCR7	100032	0.00164534	0.00781858	7.48919	7.48919
	ARG2	18949.4	2.03914e-07	1.74016e-06	7.67805	7.67805			GPM6B	1.29351e+06	6.16352e-14	2.25639e-12	2.88956	2.88956			SPINT1	73231.7	7.31672e-14	1.36615e-12	6.76758	6.76758
	RAET1D	18127.5	3.83511e-06	2.84926e-05	7.49046	7.49046			SOSTDC1	621184	3.66491e-19	1.40876e-17	2.76333	2.76333			BCL2L14	25918.2	0.00231215	0.0105274	6.21589	6.21589
	THBS1	440539	1.48868e-26	3.61081e-25	7.35707	7.35707			FHIT	31204	0.00157337	0.0194487	2.7498	2.7498			SPRR1A	14712.1	0.00777268	0.0294171	6.17107	6.17107
	AGPAT9	18522.8	0.000291373	0.001577	7.30836	7.30836			PMP22	2.94076e+06	7.01088e-12	2.4451e-10	2.71213	2.71213			FOLR4	12956	0.00907475	0.0335533	6.06208	6.06208
	MARCO	17501.3	0.000197343	0.0011127	6.78916	6.78916			SAMD15	10246.5	0.00163754	0.0200937	2.70154	2.70154			CCNB2	186837	9.38362e-18	2.14092e-16	5.44512	5.44512
	GM5150	56844	8.6256e-12	1.07105e-10	6.67889	6.67889			CD59A	291314	7.59698e-20	2.93297e-18	2.68049	2.68049			A530032D15RIK	37767.7	4.11351e-10	5.95701e-09	5.1524	5.1524
	RNF128	18533.7	1.36312e-06	1.06743e-05	6.4073	6.4073			CAR2	364195	0.000332848	0.00506927	2.64223	2.64223			GPR82	18384.1	0.000123626	0.000806901	5.06288	5.06288
	RAMP3	38336.2	0.00134059	0.00630436	6.0832	6.0832			FABP5	437783	1.62768e-10	5.45089e-09	2.56261	2.56261			FFAR2	23399.6	0.0127115	0.0445608	4.91336	4.91336
	TGM2	250420	2.9551e-05	0.000192174	6.01773	6.01773			MBP	2.09476e+06	2.75306e-09	8.86696e-08	2.54512	2.54512			FAM64A	47079.6	9.9369e-12	1.6179e-10	4.90095	4.90095
	MS4A8A	86248.1	3.5681e-12	4.51943e-11	5.93299	5.93299			POU3F1	86894.4	0.000405565	0.00604146	2.48446	2.48446			PBK	91949.5	3.38653e-10	4.957e-09	4.87279	4.87279
	LRG1	65863	3.43784e-05	0.000221127	5.901	5.901			SPON2	10147.6	0.000199485	0.00321833	2.48094	2.48094			NDC80	38512.5	3.36768e-11	5.24645e-10	4.85911	4.85911
	CHIL3	1.6254e+06	2.10681e-13	2.8811e-12	5.57343	5.57343			CRYBB1	57207.9	3.74479e-05	0.000714196	2.44881	2.44881			CKAP2	26892.1	4.95239e-06	4.22016e-05	4.84371	4.84371
	LCN2	87446.5	0.00979536	0.0359862	5.50477	5.50477			APOC1	77801.2	0.00301058	0.033628	2.44083	2.44083			IRG1	26485.8	0.00191777	0.00893311	4.83382	4.83382
	ADAM8	89153.8	8.82027e-15	1.3051e-13	5.4221	5.4221			FKBP5	135432	1.2447e-09	4.0757e-08	2.41218	2.41218			TK1	219657	3.53453e-21	9.15046e-20	4.80906	4.80906
	PLP1	2.17398e+06	1.07264e-19	2.03284e-18	5.24217	5.24217			GPNMB	60110.9	1.47449e-05	0.000322671	2.38918	2.38918			CDCA2	26641.5	2.69119e-09	3.61319e-08	4.70448	4.70448
	APOC2	480750	3.38183e-54	1.35903e-52	5.19965	5.19965			MAL	182334	6.366e-17	2.42594e-15	2.35966	2.35966			SERPINB6B	46010.7	0.00552189	0.02208	4.5188	4.5188
	GPM6B	1.29351e+06	3.04751e-27	7.56827e-26	5.13599	5.13599			CMTM5	215626	6.38325e-15	2.37119e-13	2.32913	2.32913			TNFRSF9	12694.1	0.0139869	0.0482663	4.43082	4.43082
	ACP5	227253	1.5412e-22	3.32334e-21	4.9873	4.9873			GJC1	18819.9	0.00422681	0.0441977	2.30586	2.30586			LAD1	10341.9	0.00972194	0.0355466	4.42289	4.42289
	GFAP	25885.5	2.48675e-35	7.37763e-34	4.82487	4.82487			BLZF1	51299.5	0.00146793	0.0182874	2.22651	2.22651			SECTM1A	18945.6	2.60284e-05	0.00019362	4.33697	4.33697
	GPNMB	60110.9	5.71034e-11	6.67351e-10	4.70906	4.70906			PDLIM3	10535.1	1.97178e-05	0.000423633	2.20114	2.20114			CDHR3	15598.8	0.000283329	0.00169136	4.28758	4.28758
	RHOV	18231.3	0.000438204	0.00228834	4.67727	4.67727			KCNA1	428182	1.57378e-21	6.10253e-20	2.16352	2.16352			RAD51	46096.9	1.11025e-09	1.54701e-08	4.28088	4.28088
	BACH2OS	21939.2	8.49857e-05	0.000514277	4.57126	4.57126			SEMA3B	245653	9.98787e-14	3.6264e-12	2.15161	2.15161			CDCA5	38873.4	9.61908e-11	1.45e-09	4.27801	4.27801
	SLC13A3	128076	0.000127255	0.000742618	4.52841	4.52841			GAS2L3	67028.1	1.38704e-07	3.9944e-06	2.14914	2.14914			CAPN3	19497.5	4.70761e-05	0.00033524	4.27629	4.27629
	CAMKK1	17920.9	1.20745e-06	9.51432e-06	4.48069	4.48069			TMEM63B	54500.6	1.89518e-06	4.74654e-05	2.13888	2.13888			LY6A	786400	5.81433e-19	1.37999e-17	4.23624	4.23624
	SPINT1	73231.7	4.76386e-05	0.000299487	4.41174	4.41174			PLLP	100967	0.000149606	0.00247227	2.12314	2.12314			IL12RB1	13412.4	0.00542706	0.021755	4.19475	4.19475
	FABP5	437783	4.90835e-31	1.33728e-29	4.353	4.353			PRSS12	42898.7	1.9805e-12	7.00384e-11	2.10386	2.10386			GM14446	15041.7	0.00962357	0.0352161	4.12195	4.12195
	AA467197	165423	2.49461e-09	2.56452e-08	4.32804	4.32804			HMOX1	2.256e+06	6.20247e-05	0.00112025	2.09899	2.09899			CKAP2L	44398.2	6.0713e-12	1.00706e-10	4.11535	4.11535
	FN1	457820	4.84897e-21	9.73207e-20	4.255	4.255			GJC3	74250.8	5.72765e-05	0.00104321	2.08105	2.08105			MCM10	18244.4	1.89059e-05	0.000144466	4.09432	4.09432
	SMPDL3A	850489	1.8436e-62	7.72477e-61	4.23223	4.23223			PFAS	35500.3	0.00123131	0.0158112	2.06598	2.06598			KIF11	28141.4	2.08186e-06	1.88293e-05	4.04185	4.04185
	MBP	2.09476e+06	2.41364e-24	5.54979e-23	4.1343	4.1343			SERINC5	54821.6	5.56378e-06	0.000130476	2.06477	2.06477			MELK	29943.6	1.35361e-07	1.47108e-06	4.02995	4.02995
	MMD2	408646	2.73295e-31	7.5271e-30	4.05386	4.05386			S100A4	369737	7.17778e-07	1.91141e-05	2.05765	2.05765			BIRC5	397642	4.65559e-22	1.23234e-20	4.00666	4.00666
	CAMP	197809	0.000122218	0.000715732	3.97556	3.97556			TNIK	27360.5	0.000224759	0.0035933	2.05531	2.05531			ZRANB3	18316.6	1.01993e-06	9.69594e-06	3.98413	3.98413
	DPEP2	239292	7.50142e-21	1.49202e-19	3.91343	3.91343			NTNG1	15518.3	1.47401e-06	3.75474e-05	2.04696	2.04696			CFB	40370.4	4.08894e-10	5.94088e-09	3.96427	3.96427
	GPR82	18384.1	0.00591027	0.0231874	3.90746	3.90746			CAPG	1.18373e+06	1.92416e-11	6.61924e-10	2.04174	2.04174			TPX2	80159.5	1.13636e-11	1.83834e-10	3.9564	3.9564
	GDA	144112	6.76615e-15	1.00791e-13	3.84766	3.84766			TXNRD1	135561	0.00450195	0.0465789	2.03913	2.03913			CDCA3	163666	4.11219e-19	9.83921e-18	3.94742	3.94742
	ADAMTSL4	23262.2	9.70384e-06	6.79807e-05	3.78398	3.78398			STMN1	1.76364e+06	0.000110475	0.00189102	2.02974	2.02974			BUB1	19133.4	2.3102e-05	0.000173678	3.91658	3.91658
	UCK2	26694.2	0.00155777	0.00720869	3.70762	3.70762			TSPAN18	60289.4	1.90996e-05	0.000412356	2.02167	2.02167			CENPE	68921.5	1.6777e-11	2.67736e-10	3.90676	3.90676
	CMTM5	215626	3.74261e-47	1.44807e-45	3.68328	3.68328			ANGPTL4	89205.6	3.98456e-24	1.56567e-22	2.02135	2.02135			AURKB	88771.4	2.01102e-11	3.18628e-10	3.84804	3.84804
	F7	9880.86	0.000125892	0.000735392	3.656	3.656			TIMM8A1	49722.7	0.00490268	0.0495934	2.02041	2.02041			CCNA2	106166	1.02779e-12	1.79229e-11	3.81504	3.81504
	CXCL3	15414.1	0.0054359	0.0216237	3.63916	3.63916			PLEKHB1	334653	6.1273e-10	2.0251e-08	2.00653	2.00653			KIF20A	41418.7	8.16776e-09	1.03233e-07	3.78412	3.78412
	VEGFA	29160.8	1.63304e-12	2.12007e-11	3.62292	3.62292			SYNGR1	162917	3.0552e-09	9.8222e-08	2.00305	2.00305			SKA1	33101	1.6023e-08	1.9472e-07	3.77286	3.77286
	B430306N03RIK	49946.7	2.83021e-08	2.63666e-07	3.61896	3.61896			KLF9	243220	2.03969e-09	6.61758e-08	2.00135	2.00135			SLC2A6	64674.5	9.28332e-09	1.16334e-07	3.71973	3.71973
	CLEC4E	147433	2.59442e-09	2.66557e-08	3.60533	3.60533			UBA52	1.65342e+06	1.39685e-14	5.1564e-13	0.499521	-2.00192			FBXO5	60415.6	1.36982e-08	1.68319e-07	3.71913	3.71913
	FCNA	45160	2.51634e-05	0.000164731	3.59889	3.59889			GM9797	6519.09	0.00475598	0.0487155	0.498069	-2.00776			NCAPG	31324.7	6.26938e-08	7.11066e-07	3.70222	3.70222
	SOSTDC1	621184	7.47943e-24	1.69553e-22	3.57031	3.57031			MRGPRE	8543.76	0.0041828	0.0438153	0.497985	-2.00809			H2-T24	23448.6	0.000311368	0.00183827	3.68758	3.68758
	STMN1	1.76364e+06	1.03058e-19	1.95522e-18	3.56579	3.56579			PIK3R3	8571.96	0.00177665	0.0215908	0.495495	-2.01818			CEP55	23142.2	1.31925e-05	0.000103953	3.68647	3.68647
	APOC1	77801.2	7.82097e-13	1.03588e-11	3.55728	3.55728			A1CF	6176.73	0.00343073	0.0372847	0.488609	-2.04662			TREML2	30902.7	0.000482582	0.00268334	3.66603	3.66603
	NGP	250085	0.000856125	0.00420033	3.54734	3.54734			VANGL1	9840.91	0.000259666	0.00408489	0.488536	-2.04693			OIP5	14298.5	1.35559e-06	1.2689e-05	3.6601	3.6601
	SLC16A3	115554	3.14973e-07	2.6221e-06	3.45359	3.45359			CEBPB	1.41691e+07	0.000142624	0.00237241	0.484766	-2.06285			RAD54L	25019.6	6.12822e-06	5.1526e-05	3.65901	3.65901
	EDNRB	280261	5.39174e-36	1.61862e-34	3.41006	3.41006			IIGP1	280326	8.02712e-06	0.000184093	0.484331	-2.0647			TROAP	14496.9	2.35829e-06	2.11243e-05	3.59939	3.59939
	CD300LF	73768	5.31494e-08	4.82685e-07	3.40148	3.40148			PILRB1	116174	0.00101068	0.0134166	0.477801	-2.09292			MXD3	33363.1	5.48162e-08	6.26947e-07	3.59629	3.59629
	DMKN	34401.1	0.0028926	0.0124749	3.37823	3.37823			TRF	1.37523e+07	3.48288e-13	1.25939e-11	0.467865	-2.13737			NCCRP1	19772.9	0.000578164	0.0031417	3.59255	3.59255
	SYNGR1	162917	1.93996e-34	5.67919e-33	3.36502	3.36502			HSPB1	225613	0.00211109	0.024952	0.467734	-2.13797			KIF2C	42724.6	3.01009e-09	4.0139e-08	3.57601	3.57601
	IKBKE	25901.1	6.66628e-06	4.80135e-05	3.31106	3.31106			MGL2	5.18675e+06	6.2596e-16	2.35996e-14	0.467084	-2.14094			POLE	12868.7	1.66377e-05	0.000128186	3.57366	3.57366
	ALDOC	266093	6.73877e-41	2.1586e-39	3.308	3.308			GM4955	98351.5	0.000527794	0.00759354	0.46189	-2.16502			ZWILCH	18689.7	4.13704e-05	0.00029809	3.55945	3.55945
	GYK	44971.5	0.00158453	0.00731532	3.27193	3.27193			BC049352	33151.4	0.00100008	0.0132958	0.438014	-2.28303			PRC1	59488.4	8.04673e-07	7.77021e-06	3.54461	3.54461
	HMGCS2	247686	9.74043e-42	3.14863e-40	3.21642	3.21642			KLF8	6953.59	0.00025754	0.00406229	0.418201	-2.39119			IQGAP3	11828.6	0.000594029	0.00321802	3.48678	3.48678
	TREML2	30902.7	0.00104835	0.00506196	3.13578	3.13578			BEND6	31317.5	0.00201984	0.0240019	0.412569	-2.42384			SOAT2	12210.9	0.00502702	0.0204246	3.43804	3.43804
	PLN	19090.1	4.74212e-05	0.000298293	3.13351	3.13351			EMR4	30599.2	0.00208935	0.0247779	0.409492	-2.44205			EXO1	15282.1	0.000150306	0.000962241	3.43243	3.43243
	ADORA2B	36119.3	0.000275057	0.00149786	3.08396	3.08396			OAS1G	118734	1.5129e-06	3.84355e-05	0.402799	-2.48263			PDCD1	11577.5	0.0019622	0.00910885	3.39696	3.39696
	WIF1	15199	1.0614e-134	4.87472e-133	3.08025	3.08025			AU019990	7385.49	0.00227959	0.0266565	0.395503	-2.52843			GYK	44971.5	1.46413e-06	1.35756e-05	3.35435	3.35435
	FDPS	587700	5.05719e-31	1.37571e-29	3.07996	3.07996			LYZ2	4.2527e+08	2.87963e-47	1.20373e-45	0.387703	-2.57929			NUPL2	25701.1	3.56668e-05	0.000259852	3.32617	3.32617
	NRXN2	18393	0.0129533	0.0456894	3.04635	3.04635			GM10801	7363.57	0.00399526	0.0422892	0.376884	-2.65333			RACGAP1	106345	1.42569e-14	2.79479e-13	3.32414	3.32414
	B3GNT7	14503.9	0.00510142	0.0204589	3.01253	3.01253			4930578M01RIK	8851.59	6.79034e-07	1.82195e-05	0.371513	-2.6917			KIF22	56624.8	4.56955e-08	5.29828e-07	3.3082	3.3082
	HMGCS1	341526	4.77253e-37	1.45748e-35	2.98475	2.98475			FAM71A	9376.92	0.0016896	0.0206181	0.369863	-2.7037			GM5150	56844	0.00195049	0.00906355	3.27898	3.27898
	MSMO1	327225	1.29835e-35	3.8649e-34	2.9057	2.9057			MMP13	38814.8	1.36409e-11	4.72011e-10	0.33975	-2.94334			CAR2	364195	0.0102529	0.0370969	3.27246	3.27246
	HIC1	28001	2.34801e-05	0.000154743	2.90517	2.90517			RAB11FIP4OS1	8237.47	0.000842912	0.0114994	0.326638	-3.0615			TTK	15837.7	0.000342309	0.0019976	3.26514	3.26514
	FPR1	69007	3.90953e-09	3.97746e-08	2.88815	2.88815			TGTP2	32884.6	4.69233e-06	0.000111071	0.298365	-3.3516			CACNA1F	42087.1	5.24335e-07	5.21894e-06	3.26484	3.26484
	S100B	195665	3.84272e-39	1.2026e-37	2.87273	2.87273			HIST4H4	53578.5	0.000780096	0.0107011	0.287029	-3.48397			PSRC1	27125.3	6.58044e-05	0.000455402	3.25283	3.25283
	CREG2	15442.3	0.00555636	0.0220237	2.86789	2.86789			GM20513	13083.9	5.65008e-07	1.53348e-05	0.210724	-4.74555			CDC20	115319	3.12263e-08	3.68833e-07	3.24621	3.24621
	SLC9A3R1	664156	1.44048e-25	3.40515e-24	2.85957	2.85957											TGM2	250420	0.00389445	0.0164152	3.24554	3.24554
	CD38	476905	5.4814e-31	1.48882e-29	2.84404	2.84404											ASPM	16847.1	0.000406192	0.00231388	3.24468	3.24468
	ECM1	380356	4.34733e-31	1.18993e-29	2.84283	2.84283											DTL	13760.6	0.00264251	0.0117604	3.22448	3.22448
	OCSTAMP	18351	0.00219409	0.0097649	2.84273	2.84273											FAM167B	72038.5	3.2477e-15	6.58512e-14	3.21802	3.21802
	PAQR6	216652	2.78967e-44	1.06308e-42	2.82251	2.82251											MREG	10834.2	0.00541724	0.021728	3.21732	3.21732
	TTYH1	180606	2.11652e-30	5.69623e-29	2.80995	2.80995											LRR1	16578.3	2.69246e-05	0.000199699	3.21596	3.21596
	CTSL	1.77167e+06	8.48991e-72	3.64365e-70	2.76009	2.76009											YDJC	28508.8	0.000211053	0.00130438	3.19751	3.19751
	PLEKHM1	46532.1	1.7823e-08	1.69616e-07	2.75262	2.75262											2810417H13RIK	379472	6.8974e-17	1.5245e-15	3.19519	3.19519
	A530064D06RIK	20038.5	0.000253495	0.00139679	2.74523	2.74523											EFCAB11	13307.5	0.000795397	0.00414263	3.19425	3.19425
	ADM	22297.4	0.0119389	0.0425955	2.74383	2.74383											CHAF1A	42250.2	3.00229e-09	4.00653e-08	3.19292	3.19292
	PHGDH	302582	9.62526e-26	2.29063e-24	2.72917	2.72917											CD300LF	73768	1.89557e-06	1.7277e-05	3.17299	3.17299
	PGAM1	1.01907e+06	3.06447e-55	1.23712e-53	2.70698	2.70698											CCNE1	29956.7	6.91208e-05	0.000476118	3.17074	3.17074
	GPR35	70798.9	8.30066e-08	7.44281e-07	2.70433	2.70433											DLGAP5	35875.4	2.92059e-08	3.45893e-07	3.13865	3.13865
	MPZ	3.6775e+06	1.842e-15	2.85704e-14	2.69877	2.69877											AQP1	57397	0.00111535	0.00558053	3.12054	3.12054
	USP38	28441.9	0.0035612	0.0149302	2.6591	2.6591											NEIL3	38692.8	2.85919e-07	2.96343e-06	3.10573	3.10573
	TMEM171	39268.9	0.000122005	0.000715044	2.65243	2.65243											CCNB1	91617	1.755e-08	2.12693e-07	3.08947	3.08947
	PPDPF	297907	3.33754e-35	9.88516e-34	2.65169	2.65169											CENPP	25317.6	3.86273e-06	3.34644e-05	3.08805	3.08805
	CACNA1F	42087.1	0.00247827	0.0108683	2.6452	2.6452											CDC25C	14767.1	3.81807e-05	0.000276798	3.08128	3.08128
	PRDX6	1.07456e+06	7.76185e-36	2.32225e-34	2.63758	2.63758											PLK1	57003.2	2.18015e-07	2.29735e-06	3.06141	3.06141
	PKM	2.47114e+06	7.75734e-77	3.3619e-75	2.60844	2.60844											ERCC6L	13129.7	0.00024159	0.001471	3.05497	3.05497
	PLEKHB1	334653	4.58121e-26	1.09614e-24	2.60193	2.60193											SPINT2	82830.5	0.0116223	0.0414158	3.03843	3.03843
	SLC27A1	202170	2.58835e-33	7.42974e-32	2.5925	2.5925											EME1	17709.4	4.96141e-06	4.22581e-05	3.03379	3.03379
	CAPN3	19497.5	0.0101993	0.0373305	2.59021	2.59021											CENPM	57298.9	1.18027e-09	1.64068e-08	2.98834	2.98834
	NR4A2	136627	2.50569e-10	2.8006e-09	2.58609	2.58609											PPM1J	17832.8	0.014081	0.0485624	2.98597	2.98597
	SOX2	89020.1	2.33464e-30	6.27373e-29	2.58398	2.58398											CENPH	31659.5	9.23724e-06	7.48547e-05	2.96902	2.96902
	SYNJ2	31496.9	0.00275791	0.0119435	2.57545	2.57545											SKA3	18971	1.10325e-05	8.83398e-05	2.94738	2.94738
	SEMA3B	245653	1.53539e-19	2.87898e-18	2.57339	2.57339											BUB1B	42804	1.34393e-10	2.00705e-09	2.94342	2.94342
	RCAN1	112886	9.48541e-08	8.43243e-07	2.56612	2.56612											CHAF1B	44512.3	9.49756e-08	1.05487e-06	2.93696	2.93696
	MIF	475636	1.40411e-39	4.42558e-38	2.5638	2.5638											KIF20B	36498.3	2.05919e-06	1.86338e-05	2.92772	2.92772
	GCNT2	79807.8	0.000228524	0.00127308	2.54426	2.54426											CDK1	225304	1.55959e-16	3.41296e-15	2.91226	2.91226
	MATN4	136549	2.43416e-47	9.43877e-46	2.54064	2.54064											SGOL1	28089.8	2.44874e-05	0.000183469	2.89247	2.89247
	DUSP5	125972	1.56336e-06	1.21616e-05	2.53779	2.53779											LRG1	65863	0.00360551	0.0154103	2.89094	2.89094
	FBLN5	234330	1.012e-14	1.49492e-13	2.53481	2.53481											CLSPN	24832.2	7.17849e-05	0.000493316	2.8825	2.8825
	TSPAN7	200958	5.74936e-41	1.84501e-39	2.51986	2.51986											KNSTRN	105241	4.04328e-13	7.19248e-12	2.88038	2.88038
	NRBP2	21602.8	0.000164711	0.000940701	2.51244	2.51244											MKI67	117057	7.57311e-13	1.32582e-11	2.87289	2.87289
	KIF21A	78033.7	1.31131e-38	4.07498e-37	2.50154	2.50154											SLC39A8	33816.7	5.45189e-14	1.02663e-12	2.87243	2.87243
	HIST1H1C	649874	1.32523e-24	3.06309e-23	2.49784	2.49784											GINS1	53656.8	1.4847e-08	1.81427e-07	2.85313	2.85313
	SSX2IP	58795.8	0.000107659	0.000638159	2.49204	2.49204											MCM5	176152	3.68002e-16	7.94507e-15	2.84924	2.84924
	SLC2A6	64674.5	0.00226417	0.0100263	2.48806	2.48806											CENPI	14107.9	0.000573819	0.00312385	2.8487	2.8487
	RAVER2	8149.46	0.000245472	0.00135851	2.48428	2.48428											RRM2	189002	1.34578e-07	1.46437e-06	2.84173	2.84173
	CELA1	207458	4.23538e-09	4.29908e-08	2.47946	2.47946											NUF2	39644.9	8.42525e-10	1.18611e-08	2.84171	2.84171
	GPR137B	279916	2.93019e-28	7.54172e-27	2.46497	2.46497											VDAC3-PS1	20853.5	0.00134139	0.00652144	2.83629	2.83629
	CHCHD10	77761.7	2.04208e-56	8.31985e-55	2.45872	2.45872											CENPN	25113.2	6.67986e-05	0.000461921	2.83273	2.83273
	JAM3	193641	1.24674e-23	2.80827e-22	2.45079	2.45079											BACH2OS	21939.2	0.0111351	0.039913	2.83227	2.83227
	LDHB	760966	4.47101e-18	7.89774e-17	2.44595	2.44595											DHFR	57122.5	1.11614e-05	8.914e-05	2.82854	2.82854
	GM26947	9767.15	0.00372983	0.0155618	2.43633	2.43633											TUBD1	27543.8	0.00716599	0.0275514	2.81803	2.81803
	SCD1	350688	3.47527e-12	4.40815e-11	2.43556	2.43556											UBE2C	361190	1.86841e-14	3.63446e-13	2.81535	2.81535
	CD59A	291314	9.6915e-13	1.27789e-11	2.43283	2.43283											GTSE1	14687.4	5.83975e-05	0.000409106	2.81393	2.81393
	CYP51	131988	2.78269e-39	8.72404e-38	2.43213	2.43213											CENPF	69238.4	1.21756e-07	1.33388e-06	2.80967	2.80967
	LYPLAL1	25178.5	0.000917326	0.00447329	2.42937	2.42937											CDC25B	35249.3	0.00289827	0.0127544	2.80523	2.80523
	SCG3	91236.1	3.96313e-30	1.06015e-28	2.42931	2.42931											CDC45	38592.7	9.05389e-06	7.37406e-05	2.79926	2.79926
	6030408B16RIK	14887	3.82563e-32	1.07715e-30	2.4286	2.4286											2610318N02RIK	13039	0.00310365	0.0135436	2.7826	2.7826
	PTN	167865	2.20035e-29	5.80696e-28	2.42391	2.42391											TOP2A	181443	1.42845e-11	2.28993e-10	2.78137	2.78137
	FCRL1	22799.5	0.0039597	0.0163587	2.42331	2.42331											CDCA8	159021	6.88788e-11	1.04632e-09	2.77839	2.77839
	ACSBG1	127832	2.11979e-48	8.32935e-47	2.41905	2.41905											ASF1B	168349	3.8695e-13	6.89724e-12	2.77793	2.77793
	CMTM8	40437.8	0.000600401	0.00305066	2.41698	2.41698											RAD51AP1	49468.5	5.70195e-09	7.39706e-08	2.76999	2.76999
	LYVE1	84233.5	0.000234836	0.0013066	2.41325	2.41325											IFI205	177762	7.85495e-06	6.4809e-05	2.76165	2.76165
	SIRT2	715764	4.55046e-36	1.36839e-34	2.40308	2.40308											AURKA	68532.8	1.07679e-08	1.34083e-07	2.74614	2.74614
	TSPAN15	195386	1.60832e-29	4.25087e-28	2.38745	2.38745											CD69	74887.9	0.00220181	0.0100914	2.73882	2.73882
	SFXN5	51175.2	0.00017675	0.00100299	2.38688	2.38688											TCF19	52543.2	1.4576e-07	1.57442e-06	2.73796	2.73796
	CD244	60408.3	0.00476808	0.0193016	2.38147	2.38147											AUNIP	20946.3	1.34376e-05	0.000105649	2.7277	2.7277
	CTSD	8.31392e+06	1.21179e-67	5.12604e-66	2.37812	2.37812											ATP5J2	433645	8.88732e-23	2.38461e-21	2.7066	2.7066
	PRSS35	72710.2	7.35351e-48	2.87666e-46	2.37694	2.37694											KIF15	17967.4	0.000344588	0.00200891	2.70591	2.70591
	GAPDH	4.86372e+06	8.64363e-81	3.77375e-79	2.37534	2.37534											UBE2T	46885.7	1.93718e-06	1.7629e-05	2.69284	2.69284
	SLC22A17	151228	7.81221e-29	2.0374e-27	2.36941	2.36941											2900026A02RIK	16735.1	0.00718467	0.0276112	2.68217	2.68217
	SDC1	35312.4	0.000140484	0.000812572	2.34979	2.34979											NCAPD2	40214	7.35494e-08	8.3046e-07	2.67818	2.67818
	TXNRD1	135561	8.53327e-06	6.03541e-05	2.34521	2.34521											HTR7	14656.6	0.00873257	0.032473	2.67777	2.67777
	EEPD1	80733.5	2.71636e-22	5.81486e-21	2.34377	2.34377											CREG2	15442.3	0.0115562	0.041197	2.65799	2.65799
	CKB	3.6741e+06	4.16119e-23	9.17433e-22	2.33895	2.33895											CIT	27569.1	0.000111339	0.000734043	2.65135	2.65135
	EFCAB7	14311.7	0.00172067	0.00786782	2.33502	2.33502											FIGNL1	47058.9	2.41772e-06	2.16347e-05	2.63485	2.63485
	LMNB1	308166	8.88902e-10	9.49129e-09	2.32983	2.32983											BORA	18606.3	7.63733e-05	0.000521402	2.62468	2.62468
	HIST1H2BC	472872	1.10756e-26	2.69751e-25	2.32691	2.32691											SPAG5	21075.3	0.000903957	0.0046478	2.62182	2.62182
	GRIK5	16665	0.000289664	0.00156919	2.31915	2.31915											4930427A07RIK	14370.8	0.000451143	0.00253564	2.61404	2.61404
	HTRA3	49008.1	0.0109207	0.0395049	2.31853	2.31853											SGOL2	21273	0.000146454	0.000940304	2.60777	2.60777
	BST1	121549	1.65326e-09	1.72771e-08	2.31433	2.31433											TNKS	22548.3	0.00757617	0.0288338	2.60566	2.60566
	B3GNT5	33019.1	1.88045e-05	0.000126228	2.31257	2.31257											KIFC1	32182.8	2.83218e-06	2.49396e-05	2.58095	2.58095
	PCYT2	209963	2.23126e-31	6.15494e-30	2.30196	2.30196											CASC5	32148.5	5.39085e-05	0.000379161	2.56243	2.56243
	TKT	977025	4.60456e-38	1.41843e-36	2.28831	2.28831											HMMR	45914.8	2.26865e-05	0.000170699	2.56229	2.56229
	LYSMD2	216056	2.61245e-18	4.65658e-17	2.28139	2.28139											STRIP2	10270.6	0.013494	0.0468487	2.56042	2.56042
	ADSSL1	302346	3.98185e-21	8.04652e-20	2.2714	2.2714											ANKLE1	15220.7	0.00176745	0.00830731	2.5571	2.5571
	TMOD2	222162	3.60035e-15	5.4458e-14	2.2663	2.2663											GBP5	75395.4	0.000142739	0.00091912	2.55449	2.55449
	FGF7	13362.5	4.80632e-23	1.05703e-21	2.26568	2.26568											SPC24	134757	6.39449e-14	1.20029e-12	2.54813	2.54813
	RND2	45844.5	1.51837e-16	2.4699e-15	2.25978	2.25978											E2F8	30119.3	1.3567e-06	1.26926e-05	2.54249	2.54249
	GSTA4	84580.6	1.02243e-26	2.50049e-25	2.25756	2.25756											MIS18BP1	45065.7	2.06449e-07	2.18196e-06	2.5399	2.5399
	USP36	47137	0.0114545	0.0410828	2.25664	2.25664											KLRB1B	91929.8	0.000418796	0.00237911	2.53583	2.53583
	GATM	2.7102e+06	1.65841e-09	1.73207e-08	2.24974	2.24974											DEPDC1A	17568.9	0.0023468	0.0106423	2.53299	2.53299
	CCRN4L	62862.9	0.00120754	0.00575676	2.24443	2.24443											KIF23	49188.4	2.15805e-05	0.000163071	2.53177	2.53177
	MXI1	161143	1.77941e-20	3.47662e-19	2.24218	2.24218											MAST2	27160.9	0.00463113	0.0190569	2.53137	2.53137
	PMVK	369737	2.42779e-23	5.42708e-22	2.24177	2.24177											ADCY4	9580.23	0.000689875	0.00366758	2.52353	2.52353
	FAM19A5	71871.4	9.89065e-40	3.12297e-38	2.24133	2.24133											ARHGAP27	53723.9	7.53084e-10	1.06785e-08	2.50426	2.50426
	NDRG1	437087	3.24046e-15	4.93097e-14	2.24072	2.24072											TNFSF14	23649.3	0.0118836	0.0421093	2.50028	2.50028
	POU3F1	86894.4	3.98568e-08	3.66674e-07	2.23681	2.23681											SPDL1	18398.1	0.000913429	0.00468968	2.50005	2.50005
	SYT11	233903	6.58954e-15	9.8243e-14	2.22623	2.22623											FOXM1	17131.4	6.75796e-05	0.000466774	2.49859	2.49859
	MDK	110640	9.14272e-17	1.5151e-15	2.21615	2.21615											CDKN3	65807.1	6.9663e-07	6.80919e-06	2.49028	2.49028
	MBOAT2	123507	1.13717e-24	2.64572e-23	2.21253	2.21253											ATP5L	445556	1.89499e-17	4.26301e-16	2.48391	2.48391
	DHH	136874	8.6402e-23	1.87916e-21	2.21049	2.21049											STMN1	1.76364e+06	2.18476e-32	6.99834e-31	2.48256	2.48256
	CDHR3	15598.8	0.012838	0.0453186	2.20345	2.20345											CCNE2	28119	0.000632475	0.00339922	2.47107	2.47107
	CLCF1	21300	0.0120143	0.0428472	2.20114	2.20114											RNF157	32632.6	0.00241101	0.0108976	2.46991	2.46991
	IDI1	137154	2.08291e-37	6.39409e-36	2.19155	2.19155											TMEM171	39268.9	4.61398e-05	0.000329249	2.46875	2.46875
	PIRA2	57358.5	0.00971011	0.0357473	2.19069	2.19069											AI427809	37835.8	5.79548e-06	4.88911e-05	2.46502	2.46502
	GDE1	418198	7.84208e-23	1.7119e-21	2.18425	2.18425											TACC3	115047	3.89779e-12	6.5204e-11	2.4644	2.4644
	GAS2	20446.6	0.0038751	0.0160769	2.18313	2.18313											MAD2L1	78383.1	1.13672e-09	1.58264e-08	2.45846	2.45846
	GM14275	6908.16	0.00412346	0.0169876	2.18125	2.18125											HERC3	12362.2	0.0116864	0.0415604	2.45625	2.45625
	S100A9	357405	7.21592e-05	0.000442106	2.17112	2.17112											ASS1	154899	0.000159689	0.00101714	2.45575	2.45575
	EMP2	156984	9.93418e-25	2.31736e-23	2.17044	2.17044											RTN4RL1	22681	0.00106619	0.00536491	2.45538	2.45538
	ENO1	2.15533e+06	1.16487e-58	4.77896e-57	2.16926	2.16926											B3GNT7	14503.9	0.0102362	0.0370437	2.45143	2.45143
	VCAN	40682.8	0.000167916	0.000957773	2.1641	2.1641											ATAD2	56659.4	5.04932e-07	5.03565e-06	2.45131	2.45131
	LECT1	89555.7	3.43343e-20	6.63496e-19	2.16383	2.16383											MCM7	175694	6.29134e-12	1.04258e-10	2.4428	2.4428
	E2F6	44770.5	0.000318937	0.00170737	2.15314	2.15314											E2F2	35148	0.00127067	0.00624284	2.43855	2.43855
	CHADL	76935.6	2.40808e-40	7.67201e-39	2.15046	2.15046											HMGB3	99556.5	2.22631e-06	2.00538e-05	2.43463	2.43463
	ME1	129949	7.76251e-32	2.16835e-30	2.14845	2.14845											CHTF18	21463.2	0.000419745	0.00238341	2.4333	2.4333
	UPP2	28982.1	0.0129474	0.0456775	2.13916	2.13916											SHCBP1	39520.3	7.10197e-06	5.90395e-05	2.43019	2.43019
	EPYC	11455.2	0.000119303	0.000700603	2.13708	2.13708											GMNN	205303	4.02466e-22	1.06853e-20	2.42978	2.42978
	ST3GAL5	129099	7.924e-10	8.49679e-09	2.13489	2.13489											RFC4	111934	5.84617e-11	8.94995e-10	2.42272	2.42272
	EZR	216132	1.6466e-12	2.13611e-11	2.13477	2.13477											CTLA2A	179842	7.36824e-12	1.21421e-10	2.41809	2.41809
	SHF	11983.2	7.92226e-06	5.62802e-05	2.1315	2.1315											PRR11	15941.7	0.00470432	0.0193176	2.4149	2.4149
	PLAUR	156051	8.79019e-05	0.00053011	2.12898	2.12898											FAM217B	35071.8	0.000357048	0.00206791	2.4026	2.4026
	WDR7	28419.5	0.00493882	0.0198971	2.12855	2.12855											UNG	54879.5	0.000137827	0.000890734	2.39603	2.39603
	CYP2J6	155723	8.90263e-22	1.85632e-20	2.1277	2.1277											BRIP1	15898.6	0.0017481	0.0082295	2.39527	2.39527
	C6	9648.13	9.40138e-06	6.59926e-05	2.12746	2.12746											RGS4	41851	0.00151369	0.00727509	2.39037	2.39037
	GM13431	8901.18	0.00893966	0.0333273	2.12469	2.12469											SUV39H2	18119.8	0.00261506	0.0116635	2.38711	2.38711
	1600014C10RIK	206093	1.8789e-08	1.78233e-07	2.12411	2.12411											LACE1	17526.6	0.00127066	0.00624284	2.38477	2.38477
	PEX11A	43614.8	2.75644e-31	7.57998e-30	2.12234	2.12234											B430306N03RIK	49946.7	0.00132059	0.0064384	2.38234	2.38234
	GM20498	11618.8	0.000969963	0.00470919	2.1204	2.1204											SAPCD2	14564.7	0.00122603	0.00606734	2.37651	2.37651
	1500011B03RIK	88231.6	1.54435e-05	0.00010523	2.11936	2.11936											DSN1	22643.1	0.000161344	0.00102606	2.37458	2.37458
	PI15	9060.72	0.00266452	0.0116045	2.11596	2.11596											ZFPM1	13041.7	0.00684358	0.0265136	2.37088	2.37088
	GPX4	2.43561e+06	1.71796e-60	7.11404e-59	2.10559	2.10559											PWWP2B	27721.5	0.00287205	0.0126548	2.37069	2.37069
	MYL9	310715	0.000857273	0.0042048	2.09553	2.09553											TIMM8A1	49722.7	0.00460611	0.0189628	2.36462	2.36462
	SGCA	7492.76	1.20255e-07	1.05683e-06	2.09356	2.09356											SPC25	79691.1	1.82865e-07	1.95254e-06	2.36429	2.36429
	PODXL	12747.4	6.55158e-06	4.72451e-05	2.09353	2.09353											CEP72	12963.4	0.0114407	0.0408924	2.36256	2.36256
	PLA2G16	393105	4.15786e-16	6.63531e-15	2.08699	2.08699											PIRA2	57358.5	0.00483937	0.0197712	2.36206	2.36206
	MFSD8	35842.2	0.00128065	0.00605954	2.07706	2.07706											A530040E14RIK	66974	1.07447e-09	1.49951e-08	2.35981	2.35981
	EGFL8	212597	1.16609e-19	2.20051e-18	2.07453	2.07453											PLEKHA8	29190.4	0.00677532	0.0262991	2.35267	2.35267
	CAMK2N1	98325.2	1.6389e-14	2.39892e-13	2.0694	2.0694											NUSAP1	117740	7.64923e-08	8.60392e-07	2.35249	2.35249
	GM684	10875.7	2.30599e-06	1.75904e-05	2.0665	2.0665											NEK2	17455.6	0.000315608	0.00185896	2.34492	2.34492
	SFRP5	367612	3.30078e-14	4.73352e-13	2.06582	2.06582											CAR9	43316.5	9.94387e-08	1.10168e-06	2.34319	2.34319
	TSPAN18	60289.4	1.91494e-39	6.0249e-38	2.06471	2.06471											FAT3	12008.9	0.0126007	0.044269	2.33479	2.33479
	PDLIM4	580450	1.14682e-24	2.66426e-23	2.06461	2.06461											UHRF1	51400.4	2.48972e-06	2.22115e-05	2.33406	2.33406
	GSN	2.34344e+06	8.67265e-27	2.12986e-25	2.06444	2.06444											SEMA6B	24207.6	0.00749839	0.0285809	2.33215	2.33215
	SCD2	620290	8.67849e-08	7.75799e-07	2.06332	2.06332											IL27	19828.8	0.00748249	0.0285387	2.32868	2.32868
	PEBP1	1.57042e+06	2.63543e-27	6.56334e-26	2.0617	2.0617											ATP5E	556015	1.20652e-21	3.16524e-20	2.32275	2.32275
	CDK20	46276.1	3.1725e-06	2.38504e-05	2.06037	2.06037											TMEM8	76257.6	1.53245e-07	1.64622e-06	2.30061	2.30061
	MAL	182334	4.21761e-21	8.49382e-20	2.05712	2.05712											NUP188	30697.1	0.00517781	0.0209266	2.30003	2.30003
	DDIT4	284507	2.03731e-06	1.56489e-05	2.05679	2.05679											MCM6	258316	1.04599e-16	2.30327e-15	2.29607	2.29607
	KIF13A	31372.9	0.00141666	0.00661554	2.05444	2.05444											TIMELESS	33939.2	0.00445216	0.0184191	2.29499	2.29499
	AI427809	37835.8	0.003802	0.0158218	2.04949	2.04949											GFAP	25885.5	2.64191e-36	8.83066e-35	2.2877	2.2877
	VDAC1	682623	2.10436e-31	5.82306e-30	2.04669	2.04669											TYMS	184678	3.93096e-09	5.17167e-08	2.28525	2.28525
	ACAA2	337083	2.97443e-21	6.05919e-20	2.04603	2.04603											FGF7	13362.5	1.83414e-12	3.12139e-11	2.28466	2.28466
	MYL6B	25262.6	7.85777e-08	7.07079e-07	2.04499	2.04499											ADAM8	89153.8	0.0110955	0.0398034	2.28239	2.28239
	TNKS	22548.3	0.0124759	0.0442525	2.04126	2.04126											GM22107	26797.4	0.000121755	0.000796475	2.28051	2.28051
	WNT6	138326	6.97807e-32	1.95231e-30	2.04121	2.04121											BRCA1	13628.8	0.00312768	0.0136373	2.27396	2.27396
	NKAIN4	77905.8	3.25973e-28	8.35342e-27	2.04091	2.04091											SAMD15	10246.5	0.000865918	0.00446781	2.271	2.271
	CSRP1	530118	7.08184e-14	9.90673e-13	2.03995	2.03995											UBL5	348934	7.4492e-15	1.48833e-13	2.26591	2.26591
	RAB3GAP2	36995.7	0.000457338	0.00237912	2.03457	2.03457											CMTM8	40437.8	2.32701e-07	2.44046e-06	2.26235	2.26235
	METRN	200096	2.74653e-09	2.81695e-08	2.03187	2.03187											ENKD1	20520.6	0.0116898	0.0415643	2.26161	2.26161
	CYP2J9	101978	1.77791e-32	5.04608e-31	2.02796	2.02796											PYROXD2	26834.9	0.00645423	0.0252766	2.25956	2.25956
	MDH2	1.1725e+06	4.01071e-27	9.90466e-26	2.02571	2.02571											PNP2	19965.7	0.00622802	0.0245593	2.25703	2.25703
	FAM20A	12310.4	0.00316398	0.0134933	2.02551	2.02551											PKP3	49789.5	0.000120799	0.000790806	2.2564	2.2564
	AFP	9927.16	0.0143409	0.0498673	2.02351	2.02351											RCC1	51214.8	7.49028e-05	0.000511759	2.24355	2.24355
	ABHD4	340128	1.45962e-16	2.37871e-15	2.02231	2.02231											NLRC3	17405.8	0.00401792	0.0168512	2.24131	2.24131
	PLEKHA4	122213	3.09341e-19	5.74556e-18	2.02126	2.02126											HIF1AN	40951.3	0.0005296	0.00291453	2.23528	2.23528
	GPR126	43470.3	8.27828e-10	8.8713e-09	2.02095	2.02095											NDUFA2	398968	1.4118e-12	2.43545e-11	2.23396	2.23396
	FXYD1	339153	9.91646e-08	8.79793e-07	2.02006	2.02006											GM1840	33012.9	0.000262777	0.00158311	2.23035	2.23035
	PWWP2B	27721.5	0.0141389	0.049262	2.01962	2.01962											WNT5B	10122.5	1.47261e-05	0.000114556	2.22728	2.22728
	NDRG2	418493	4.73625e-09	4.78278e-08	2.01788	2.01788											ENO3	68770.9	0.00125495	0.00617762	2.21845	2.21845
	TSPAN3	1.16114e+06	7.40711e-15	1.09969e-13	2.01374	2.01374											MT-ATP8	189204	2.10438e-14	4.08448e-13	2.21607	2.21607
	DBI	3.23055e+06	1.85996e-19	3.48019e-18	2.01301	2.01301											44075	62632.1	0.000398352	0.00227435	2.21428	2.21428
	TREML4	23778.5	0.00185699	0.00842132	2.01248	2.01248											RMI2	19122.1	0.000724438	0.00382539	2.21046	2.21046
	BAMBI	152658	1.35584e-16	2.21161e-15	2.01164	2.01164											TRIM59	53497.3	1.47975e-05	0.000115011	2.20578	2.20578
	FAM134B	542848	1.88665e-18	3.38333e-17	2.00921	2.00921											DPP4	44086.4	0.00288358	0.0126961	2.20288	2.20288
	NINL	12014.2	0.0039561	0.0163477	2.00627	2.00627											A530040E14RIK	35570.6	3.6495e-06	3.17571e-05	2.2019	2.2019
	IL10	83505.4	0.0113829	0.0409009	2.00624	2.00624											4930579G24RIK	47814.2	5.88809e-06	4.96013e-05	2.19817	2.19817
	MGST1	554234	3.02226e-18	5.38162e-17	2.00538	2.00538											LDLRAP1	82939.9	1.01837e-06	9.68629e-06	2.19356	2.19356
	NUPL2	25701.1	0.00480087	0.0194165	2.00383	2.00383											PTGES3L	30588.4	0.0087549	0.0325424	2.18897	2.18897
	ELL2	44816.4	0.000285164	0.00154766	2.00265	2.00265											KIF14	9604.75	0.004495	0.0185746	2.1872	2.1872
	OTOS	7458.02	0.00776749	0.0295175	0.499954	-2.00018											SYNJ2	31496.9	0.00370174	0.0157644	2.18061	2.18061
	IFI203	454489	1.44039e-07	1.25648e-06	0.499633	-2.00147											C330027C09RIK	22617.6	0.00253944	0.0113821	2.17626	2.17626
	CTSC	2.91232e+07	1.63798e-11	1.99468e-10	0.499613	-2.00155											JAK3	75435.1	1.1119e-08	1.38358e-07	2.17586	2.17586
	NRGN	9799.92	0.00932858	0.0345224	0.499401	-2.0024											MMP25	10398.4	0.000545615	0.00298964	2.17543	2.17543
	BNC2	8755.07	3.50755e-09	3.57673e-08	0.497351	-2.01065											ZCWPW1	30937.4	0.00725795	0.0278423	2.17371	2.17371
	GPR34	1.42873e+06	1.27171e-09	1.33768e-08	0.496816	-2.01282											E2F6	44770.5	0.00999123	0.0363134	2.17163	2.17163
	BC028528	436981	0.000205343	0.00115193	0.496567	-2.01383											RAB19	17129.2	0.00472935	0.0193889	2.16824	2.16824
	RUNX1	511603	0.000108328	0.000641477	0.495218	-2.01931											CXCL9	209543	3.93542e-05	0.000284557	2.16334	2.16334
	SEMA4A	372372	5.60276e-10	6.0518e-09	0.495153	-2.01958											APITD1	60945.9	1.42351e-06	1.32198e-05	2.16044	2.16044
	CYBB	2.08998e+06	5.10387e-07	4.17229e-06	0.493405	-2.02673											HELLS	38274	1.10848e-05	8.86083e-05	2.15894	2.15894
	H2-T23	595488	2.23846e-09	2.30656e-08	0.493221	-2.02749											MYBL2	19919.8	0.00161105	0.00767832	2.15077	2.15077
	PIK3R3	8571.96	0.00122853	0.00584735	0.491731	-2.03363											FAM110A	97383	4.47365e-09	5.85082e-08	2.14886	2.14886
	TNIP3	108643	0.00853192	0.0320164	0.491364	-2.03515											RAB27A	23272.7	0.00529351	0.0213114	2.14384	2.14384
	H2-OB	91001.9	0.000315105	0.0016889	0.487002	-2.05338											INTS5	33905.4	0.000440854	0.00248492	2.13859	2.13859
	BTG2	4.24443e+06	2.36197e-07	2.00309e-06	0.486879	-2.0539											POC1A	36750	1.38559e-06	1.29183e-05	2.13439	2.13439
	ICOSL	167264	0.000215462	0.00120525	0.486678	-2.05475											GM21188	6782.39	0.00148354	0.00713989	2.12907	2.12907
	RPL23A-PS3	143509	0.00289394	0.0124776	0.484789	-2.06275											PKMYT1	54771	5.17767e-07	5.15783e-06	2.12809	2.12809
	CYP27A1	288158	7.86948e-05	0.000479821	0.48359	-2.06787											SMC2	170810	3.1646e-10	4.64369e-09	2.12711	2.12711
	ALDH1A1	20011	0.00424555	0.017435	0.482613	-2.07205											COX5B	430141	7.30406e-20	1.79625e-18	2.12486	2.12486
	GPC3	94861.5	7.03322e-08	6.34497e-07	0.482163	-2.07399											POLL	33141.4	0.0134136	0.0466521	2.1231	2.1231
	C3	93891.3	4.7219e-11	5.544e-10	0.481824	-2.07545											PCNA-PS2	15847.2	0.00706936	0.0272391	2.12219	2.12219
	KLF2	3.06571e+06	8.24278e-05	0.000499482	0.481502	-2.07684											DNPH1	33799.6	0.00103008	0.00520693	2.11925	2.11925
	CD14	7.59721e+06	1.41224e-06	1.10346e-05	0.478583	-2.0895											GM10076	2.59877e+06	3.50807e-24	9.7073e-23	2.11059	2.11059
	GPR183	880223	2.88585e-08	2.68708e-07	0.478392	-2.09034											PIGN	43530.7	0.000108677	0.00071944	2.11023	2.11023
	MNDA	475885	0.000163881	0.000936568	0.477424	-2.09458											GARNL3	47534.1	0.00410763	0.0171705	2.11004	2.11004
	LST1	2.17471e+06	3.41753e-10	3.77208e-09	0.477381	-2.09476											LIG1	148736	1.32293e-10	1.97735e-09	2.10797	2.10797
	NFKBIA	5.05088e+06	8.62594e-06	6.09365e-05	0.477032	-2.0963											PRIM1	86561.7	5.14702e-08	5.90971e-07	2.10703	2.10703
	CAR2	364195	5.47565e-10	5.92537e-09	0.476787	-2.09737											PIF1	8988.83	0.0106426	0.038334	2.10559	2.10559
	FAM221B	17508.9	0.0067148	0.0259522	0.476628	-2.09807											NDUFA1	170156	1.65733e-17	3.74743e-16	2.10431	2.10431
	IRF7	651050	0.00264536	0.011538	0.475949	-2.10106											DSCC1	30203.1	0.000242275	0.00147466	2.10204	2.10204
	ADCYAP1R1	8048.51	0.012656	0.0447566	0.475819	-2.10164											CD244	60408.3	0.000407478	0.00231971	2.09887	2.09887
	GM26902	16452.1	0.00960131	0.0354057	0.475147	-2.10461											ARHGEF39	27696	0.000111052	0.000732423	2.0972	2.0972
	CSF1R	8.28545e+06	2.30577e-10	2.58205e-09	0.47324	-2.11309											TRIP13	29212.1	0.000211806	0.00130812	2.09568	2.09568
	SLC2A3	22319.7	0.000256156	0.00140874	0.471837	-2.11938											KLRK1	159362	2.82751e-09	3.78758e-08	2.09284	2.09284
	SERPING1	385611	7.10883e-09	7.07362e-08	0.47116	-2.12242											ESCO2	30043.8	0.00215524	0.00990102	2.0919	2.0919
	H2-AA	2.62619e+08	3.86757e-116	1.74901e-114	0.470582	-2.12503											2010107E04RIK	540372	1.29033e-13	2.37415e-12	2.09022	2.09022
	FCGR2B	3.71706e+06	8.3746e-05	0.000507122	0.470518	-2.12532											GALNS	67889.9	0.000278781	0.00167099	2.08642	2.08642
	BC035044	258707	2.84803e-05	0.000185415	0.469624	-2.12936											KPNA2	146681	4.93215e-08	5.68516e-07	2.08198	2.08198
	WDR89	167266	6.50207e-11	7.57376e-10	0.468709	-2.13352											SAA1	30156.5	1.57053e-05	0.00012132	2.0805	2.0805
	MAP3K8	287837	0.000808853	0.00399167	0.467928	-2.13708											RRM1	158030	7.38678e-09	9.43736e-08	2.07656	2.07656
	F630028O10RIK	208025	0.00219159	0.00975623	0.467774	-2.13778											XKR5	7415.37	0.0077138	0.0292535	2.07637	2.07637
	CCL12	7.9729e+06	8.69053e-07	6.96582e-06	0.466671	-2.14284											KIF4	18688.6	0.000609065	0.0032894	2.0748	2.0748
	IL15	118118	9.88731e-05	0.000590633	0.465854	-2.1466											1600014C10RIK	206093	1.12763e-14	2.2253e-13	2.07263	2.07263
	ZBP1	555628	9.87237e-05	0.00058994	0.464917	-2.15092											LMNB1	308166	4.83109e-18	1.11228e-16	2.07229	2.07229
	UBA52	1.65342e+06	0.000140662	0.000813335	0.463522	-2.15739											CDT1	81982.4	2.11801e-07	2.23586e-06	2.07175	2.07175
	DGKG	12574.4	0.00416722	0.017152	0.462817	-2.16068											GSG2	26896.4	0.000166219	0.00105419	2.06166	2.06166
	IER3	1.50743e+06	0.000752096	0.00374291	0.462566	-2.16186											1110008L16RIK	22690.4	0.00369818	0.0157546	2.0566	2.0566
	PYDC4	127452	1.91085e-05	0.000128032	0.46107	-2.16887											ZBTB5	23969.6	0.00778031	0.0294334	2.05317	2.05317
	TMEM88	34433.9	4.85592e-06	3.57164e-05	0.460687	-2.17067											FAM65A	43253.6	0.00145535	0.00701759	2.04032	2.04032
	RPS28	1.97973e+06	1.67299e-20	3.27232e-19	0.460626	-2.17096											MND1	17934.9	0.000672488	0.00358809	2.03524	2.03524
	CD52	9.47161e+06	1.98491e-08	1.87987e-07	0.460335	-2.17233											CCDC94	51229.3	0.0114266	0.0408503	2.03345	2.03345
	LCP1	6.54617e+06	0.000234231	0.00130364	0.460246	-2.17275											BC030867	10772.9	0.00481219	0.0196738	2.02732	2.02732
	UNC93B1	1.04014e+07	2.20158e-11	2.65722e-10	0.45868	-2.18017											WIF1	15199	1.38089e-32	4.43945e-31	2.02637	2.02637
	CD300LH	54804.9	9.02218e-05	0.000543544	0.458473	-2.18115											USP38	28441.9	0.00854571	0.0318989	2.02569	2.02569
	STK3	80376.9	0.000123294	0.000721403	0.458243	-2.18225											LRRK2	15893.6	0.00653115	0.0255124	2.02226	2.02226
	GM8186	136948	2.44994e-05	0.000160861	0.458212	-2.18239											NCAPG2	42707.7	0.00135552	0.00658469	2.0216	2.0216
	THY1	83312.6	5.67853e-23	1.24421e-21	0.456785	-2.18921											DPM3	157440	5.08632e-16	1.0875e-14	2.01881	2.01881
	NUP107	26025.7	0.00538541	0.021447	0.456718	-2.18954											RASGRF2	13824.1	0.00738696	0.0282474	2.01504	2.01504
	PID1	3.86103e+06	5.67364e-07	4.62097e-06	0.456646	-2.18988											KREMEN1	16706.9	0.00371404	0.0157978	2.01433	2.01433
	TMOD1	66054.6	0.00876356	0.0327593	0.45562	-2.19481											MYO1E	33493.6	0.000445408	0.00250739	2.01408	2.01408
	PDCD4	92951	1.28113e-08	1.23719e-07	0.455543	-2.19518											HMGXB3	20704.7	0.0100586	0.0365209	2.01098	2.01098
	RPL13-PS3	136826	1.22259e-08	1.18518e-07	0.454919	-2.19819											NPL	377928	1.43312e-13	2.62868e-12	2.0033	2.0033
	RPL36-PS3	79366.4	4.19146e-10	4.58906e-09	0.452928	-2.20786											GINS2	152339	6.81063e-12	1.12653e-10	2.00289	2.00289
	GM11808	150186	7.17559e-08	6.4668e-07	0.452717	-2.20889											SPSB1	52554.1	0.0008512	0.00440139	2.00141	2.00141
	H2-EB1	1.99175e+08	1.23373e-115	5.56499e-114	0.449663	-2.22389											TDRD7	57859.2	0.00205433	0.00949415	2.00118	2.00118
	RHOB	1.94547e+06	3.37513e-05	0.000217569	0.448234	-2.23098											SHISA3	14960.2	1.83325e-06	1.67349e-05	0.499128	-2.00349
	APLNR	22317.2	1.00644e-09	1.0714e-08	0.447317	-2.23555											SULT1A1	486587	6.03577e-06	5.0797e-05	0.499032	-2.00388
	ST3GAL6	731800	1.2119e-15	1.89636e-14	0.445912	-2.2426											CRLF2	1.30293e+06	2.74417e-06	2.42249e-05	0.498805	-2.00479
	SMPDL3B	169371	0.000253336	0.00139635	0.445427	-2.24503											EVL	929283	0.00802474	0.0302545	0.498759	-2.00498
	LEF1	13099.4	3.80094e-12	4.80745e-11	0.444562	-2.24941											NEDD4	147074	1.56301e-07	1.67803e-06	0.498693	-2.00524
	SPOCK2	44474.3	0.00260663	0.0113804	0.440144	-2.27198											SKAP2	1.32464e+06	7.58417e-06	6.28118e-05	0.497301	-2.01086
	1110002L01RIK	14215.8	0.0069375	0.026702	0.439482	-2.2754											CAR11	39116.9	0.000372952	0.00214596	0.496699	-2.01329
	GM6576	12643.7	0.0031724	0.0135167	0.438841	-2.27873											NSMF	71218.8	3.05383e-05	0.00022499	0.496565	-2.01383
	NFKBIZ	1.10092e+06	6.18757e-11	7.21692e-10	0.43826	-2.28175											GRB2	1.14138e+06	0.000252083	0.00152701	0.49644	-2.01434
	KLF6	4.94563e+06	5.31943e-11	6.22902e-10	0.433797	-2.30523											DYNLT1C	113614	0.0101687	0.0368449	0.496146	-2.01553
	PF4	1.23043e+07	5.27219e-11	6.17779e-10	0.431846	-2.31564											MSRB1	1.19276e+06	1.57145e-08	1.9163e-07	0.496055	-2.0159
	SLCO2B1	639481	1.28535e-07	1.1268e-06	0.431418	-2.31794											KLF8	6953.59	0.00586416	0.0233064	0.495887	-2.01659
	CIITA	72022.9	0.00353703	0.0148403	0.4313	-2.31857											SIN3B	910889	5.55916e-07	5.50992e-06	0.495835	-2.0168
	ATF3	3.5481e+06	4.54272e-09	4.60312e-08	0.429274	-2.32952											CDKN1C	96051.6	0.000257653	0.00155383	0.495575	-2.01786
	PLTP	2.41841e+06	3.73472e-06	2.77935e-05	0.429116	-2.33037											SNAP23	1.26737e+06	0.000339993	0.00198736	0.49485	-2.02081
	CD1D1	59317.4	0.00385921	0.0160259	0.425908	-2.34793											MAMDC2	21404.5	0.0100618	0.0365247	0.494405	-2.02263
	RGS2	2.53777e+06	8.08221e-08	7.25062e-07	0.425865	-2.34816											CMPK1	1.38934e+06	5.19006e-08	5.95141e-07	0.493889	-2.02475
	ZFP36L2	1.02117e+06	3.346e-06	2.50695e-05	0.423845	-2.35935											BCL2A1D	547442	0.00304201	0.0133075	0.493395	-2.02678
	IER2	2.01654e+06	1.76426e-07	1.52397e-06	0.423791	-2.35966											ADCY1	6794.83	0.00129019	0.00632294	0.492967	-2.02854
	GM9843	231957	1.25131e-09	1.31858e-08	0.422475	-2.36701											NOL7	892574	0.0053895	0.0216289	0.492831	-2.02909
	ARL5C	240909	0.000712656	0.00356671	0.421104	-2.37471											D17WSU104E	995282	1.45078e-05	0.000112957	0.492544	-2.03028
	ATP8B2	9066.34	0.00045296	0.00235913	0.419898	-2.38153											RAB24	740880	0.00328004	0.0142047	0.492509	-2.03042
	CLEC2D	190861	1.5037e-09	1.57795e-08	0.416939	-2.39843											G3BP1	975719	0.0113986	0.0407667	0.492398	-2.03088
	SGSM2	18900.8	0.00495754	0.0199588	0.416422	-2.40141											KANK1	20694.5	0.00271745	0.0120426	0.491603	-2.03416
	CYBA	9.80118e+06	2.08035e-43	6.81201e-42	0.416391	-2.40159											GM16286	732783	0.00807392	0.0304075	0.49159	-2.03421
	CCL2	5.36386e+06	0.0103738	0.0378347	0.415733	-2.40539											CEP85L	32642.5	1.51029e-07	1.62637e-06	0.491387	-2.03506
	G530011O06RIK	2.09503e+06	9.24043e-06	6.50176e-05	0.415605	-2.40613											DBNL	1.00933e+06	0.000302431	0.00179149	0.491121	-2.03616
	FSTL1	70368.7	2.68753e-30	7.21106e-29	0.414988	-2.40971											SLFN2	2.01958e+06	0.00125167	0.00617008	0.489373	-2.04343
	FXYD5	5.23521e+06	0.00330899	0.0140412	0.414492	-2.41259											GLUD1	938657	0.000142367	0.000917061	0.488161	-2.0485
	MEF2C	1.25278e+06	1.05547e-09	1.12156e-08	0.413946	-2.41577											COMMD3	709311	0.00320464	0.0139259	0.487807	-2.04999
	CASP4	196848	2.22047e-09	2.28935e-08	0.412733	-2.42287											SSBP2	249962	0.00180129	0.00845289	0.487634	-2.05072
	LPAR6	827863	2.63856e-10	2.93983e-09	0.410678	-2.435											PHLDA3	240632	5.10154e-06	4.33055e-05	0.487464	-2.05143
	OAS1G	118734	0.000440882	0.00230029	0.4104	-2.43665											EIF4EBP1	796542	0.00293582	0.012894	0.487374	-2.05181
	HEPACAM2	59781.2	0.00133091	0.0062655	0.409774	-2.44037											SDHD	1.02337e+06	7.58774e-07	7.37989e-06	0.487161	-2.05271
	GADD45G	852157	0.000285009	0.00154766	0.408467	-2.44818											GM2A	1.7458e+06	0.00081325	0.00422814	0.486804	-2.05421
	TCF7	16182.7	0.00359913	0.0150555	0.404205	-2.47399											TRIM68	21727.2	0.0135155	0.0468774	0.486804	-2.05422
	TSPAN4	427647	0.00497513	0.0200172	0.403983	-2.47535											H2AFY	1.8334e+06	5.94375e-08	6.75867e-07	0.486328	-2.05622
	IL27RA	9537.31	0.00728095	0.0278903	0.403279	-2.47968											BNC2	8755.07	9.16341e-11	1.38367e-09	0.486273	-2.05646
	C1QC	1.17675e+08	2.2419e-21	4.59342e-20	0.402833	-2.48242											ZBTB4	73554.4	0.00520854	0.0210124	0.485591	-2.05934
	CCL4	1.00347e+07	2.9784e-09	3.05122e-08	0.402165	-2.48654											PPP1R15A	733003	0.00985753	0.0359309	0.48559	-2.05935
	FXYD2	101519	0.00867156	0.0324784	0.402059	-2.48719											FAM49B	3.4986e+06	7.70294e-07	7.47548e-06	0.485562	-2.05947
	CD209A	524385	7.7741e-06	5.52943e-05	0.40017	-2.49894											PPT1	2.01805e+06	1.04875e-05	8.43679e-05	0.485183	-2.06108
	CTSS	1.22341e+08	3.66913e-33	1.0515e-31	0.399223	-2.50486											KXD1	821070	4.36896e-07	4.40935e-06	0.484748	-2.06293
	TYROBP	1.74879e+07	1.50651e-52	6.02674e-51	0.398008	-2.51251											RRP1	802829	0.00912215	0.033695	0.484422	-2.06431
	MYOC	23239.3	2.53642e-16	4.08088e-15	0.397967	-2.51277											GM16553	7309.65	0.0120689	0.0426293	0.484353	-2.06461
	AW112010	1.596e+06	7.28318e-09	7.23084e-08	0.396082	-2.52473											BEX1	13947.4	0.00753262	0.028699	0.484142	-2.06551
	GM12204	7786.56	0.00540779	0.0215168	0.395594	-2.52784											BCAP31	1.43981e+06	0.00113921	0.00568473	0.484116	-2.06562
	CCL3	5.76853e+06	4.78721e-11	5.61695e-10	0.394686	-2.53366											FSTL1	70368.7	5.9906e-09	7.76013e-08	0.483995	-2.06614
	CD83	3.82937e+06	5.43627e-14	7.65929e-13	0.393805	-2.53932											CBX7	66284.3	0.000377349	0.00216774	0.483883	-2.06661
	GM16553	7309.65	0.00228658	0.0101154	0.392368	-2.54863											GRINA	924755	0.0108451	0.0390078	0.483658	-2.06758
	H2-DMB1	7.20161e+06	2.94107e-56	1.19549e-54	0.391919	-2.55155											EIF3K	2.12186e+06	6.28357e-05	0.000436224	0.483243	-2.06935
	LILRA5	941085	1.6214e-23	3.63827e-22	0.391548	-2.55397											IRF2	469182	0.0121175	0.0427667	0.481756	-2.07574
	HERPUD1	1.00128e+06	9.07135e-16	1.42831e-14	0.390298	-2.56215											NTAN1	778858	0.00220398	0.0100961	0.480113	-2.08284
	EPHB2	9602.95	1.33128e-05	9.15583e-05	0.390206	-2.56275											JUN	5.66562e+06	5.12427e-06	4.34567e-05	0.479987	-2.08339
	4930578M01RIK	8851.59	0.00667527	0.0258389	0.388472	-2.57419											IFNGR2	1.28991e+06	0.000312408	0.00184318	0.479709	-2.0846
	RPS12-PS3	199237	2.0258e-09	2.09597e-08	0.387334	-2.58175											CLEC4B1	502044	6.30561e-08	7.14716e-07	0.478905	-2.0881
	HPGD	1.96197e+06	3.99247e-35	1.18052e-33	0.386445	-2.58769											TMEM204	18261.7	0.00411934	0.0172113	0.478799	-2.08856
	FCER1G	2.48133e+07	2.76133e-61	1.14614e-59	0.383167	-2.60983											TCP1	983294	1.40585e-07	1.52504e-06	0.478544	-2.08967
	MPV17L	34398.4	0.0121942	0.0434189	0.382977	-2.61112											CTSB	1.98118e+07	2.67381e-16	5.8153e-15	0.478365	-2.09045
	ADAM33	270194	6.21765e-10	6.69552e-09	0.38217	-2.61664											H2-K1	8.4001e+06	2.77811e-06	2.45122e-05	0.478219	-2.09109
	TNFRSF17	55083.4	0.00036751	0.0019456	0.381459	-2.62151											CLEC4A1	1.76133e+06	1.40922e-05	0.000110061	0.478184	-2.09125
	GM10801	7363.57	0.00639263	0.024881	0.37786	-2.64648											GABARAPL1	201418	2.22585e-05	0.000167766	0.477806	-2.0929
	SLC7A13	18612	0.00780886	0.0296556	0.375168	-2.66547											GM9797	6519.09	0.00366163	0.01562	0.477428	-2.09456
	PDLIM1	43545.4	1.83919e-12	2.38245e-11	0.371598	-2.69108											USP11	29912.8	0.0131987	0.0460404	0.477311	-2.09507
	HSPA1B	125159	0.000278399	0.00151466	0.36931	-2.70775											LPAR4	13006	0.00675638	0.0262417	0.476842	-2.09713
	GM5475	9716.76	0.00130759	0.00616556	0.367106	-2.72401											SSU72	945248	0.000817339	0.00424565	0.476658	-2.09794
	GM13166	14918.4	0.00348384	0.01466	0.36125	-2.76817											HSPA1B	125159	0.00056139	0.00306508	0.476252	-2.09973
	C1QB	1.85246e+08	5.36409e-25	1.25793e-23	0.360006	-2.77773											CYP27A1	288158	0.00389338	0.0164152	0.476151	-2.10017
	SLAMF8	281056	2.86246e-06	2.16299e-05	0.359368	-2.78266											SEMA4A	372372	2.94525e-05	0.000217444	0.475961	-2.10101
	FBXO17	16179.8	0.0109018	0.0394526	0.355165	-2.81559											PLEKHJ1	974809	0.00702428	0.0271009	0.475864	-2.10144
	SRGN	6.02931e+06	2.9055e-10	3.23114e-09	0.351773	-2.84275											AHSA1	1.0531e+06	0.000531441	0.00292092	0.474576	-2.10714
	AXL	846220	4.37471e-10	4.77197e-09	0.351648	-2.84375											EWSR1	1.28073e+06	7.6038e-07	7.39145e-06	0.473596	-2.1115
	FASL	7726.63	0.0105662	0.0383794	0.351428	-2.84554											TNFAIP8	1.81353e+06	2.83416e-08	3.36107e-07	0.473056	-2.11392
	HESX1	8522.16	0.0138052	0.0482417	0.35117	-2.84762											PSMA2	1.91828e+06	0.000102428	0.000683448	0.472786	-2.11512
	IL6	26715	1.93761e-07	1.65993e-06	0.350795	-2.85067											4930578M01RIK	8851.59	0.00230568	0.0105075	0.472416	-2.11678
	FAM26F	165064	0.00668802	0.0258769	0.350778	-2.8508											TCEAL1	82292.6	0.0052487	0.0211484	0.472098	-2.1182
	C1QA	2.04626e+08	3.3269e-28	8.51319e-27	0.349642	-2.86007											FABP7	2.98896e+06	1.46318e-16	3.20594e-15	0.471651	-2.12021
	H2-DMA	1.16561e+07	5.99588e-59	2.46556e-57	0.347883	-2.87453											ZNF512B	17715.4	0.0126379	0.0443643	0.471622	-2.12034
	BEND6	31317.5	0.0068885	0.0265423	0.347368	-2.87879											FAM171B	35352.6	0.000414356	0.00235659	0.471393	-2.12137
	OLFML3	1.19595e+06	0.000274314	0.00149566	0.345405	-2.89515											CCT4	1.81314e+06	5.73659e-11	8.80506e-10	0.47059	-2.12499
	PROS1	239151	4.69492e-19	8.65646e-18	0.342424	-2.92036											TPD52	2.05267e+06	1.53291e-05	0.000118829	0.470396	-2.12587
	CLEC4B1	502044	2.10437e-20	4.09345e-19	0.342039	-2.92365											IFI27L2A	4.10964e+06	8.16619e-06	6.71915e-05	0.470271	-2.12643
	ETS1	44099.8	1.67133e-09	1.7435e-08	0.342023	-2.92378											VASP	1.59078e+06	2.02754e-07	2.14548e-06	0.469624	-2.12936
	H2-Q7	599108	0.000136618	0.000792287	0.340336	-2.93827											GUCA1A	164927	0.00915242	0.0337997	0.469342	-2.13064
	IER5	4.85709e+06	1.79457e-21	3.68115e-20	0.33938	-2.94655											NONO	1.1732e+06	2.5136e-06	2.2402e-05	0.469222	-2.13119
	CTSH	1.27631e+07	4.18676e-30	1.11828e-28	0.33631	-2.97344											SEC61A2	34198.7	0.00805977	0.0303671	0.468838	-2.13293
	TNFRSF1A	1.43776e+06	6.90047e-06	4.95187e-05	0.336292	-2.97361											ATP5A1	2.67528e+06	1.37188e-06	1.28143e-05	0.46866	-2.13374
	FGL2	840557	3.98642e-11	4.72123e-10	0.333788	-2.99592											HOXC8	17112.1	1.2853e-16	2.8267e-15	0.467906	-2.13718
	TXK	9112.61	0.0078919	0.0299067	0.330403	-3.02661											UBE2I	1.49702e+06	4.31489e-08	5.02126e-07	0.467844	-2.13747
	GM4955	98351.5	2.13932e-06	1.64182e-05	0.330279	-3.02774											PTAFR	302192	0.0010642	0.00535644	0.467328	-2.13983
	GPR165	16749.5	0.00632872	0.0246594	0.326728	-3.06065											PSMC5	873086	0.00376504	0.0159725	0.467236	-2.14024
	GATA2	20089.8	0.00223791	0.00992741	0.326218	-3.06543											LMAN2	1.35003e+06	1.60187e-08	1.9472e-07	0.466646	-2.14295
	GM26764	7228.98	0.000757849	0.0037673	0.324876	-3.0781											ROBO2	11318.9	0.00877167	0.0325773	0.466643	-2.14297
	SERPINF1	1.06724e+06	5.91749e-31	1.6048e-29	0.324066	-3.08579											GADD45B	524680	0.00982087	0.0358268	0.465515	-2.14816
	EGFL7	205603	5.65198e-16	8.97113e-15	0.32383	-3.08804											MRPL24	720905	0.00252818	0.0113345	0.465355	-2.1489
	RAB11FIP4OS1	8237.47	0.000781678	0.00387486	0.323706	-3.08922											SPG21	985727	0.00714499	0.0274826	0.465183	-2.14969
	LY6A	786400	3.16563e-11	3.78207e-10	0.319176	-3.13307											FYB	2.48414e+06	0.00749599	0.0285809	0.464431	-2.15317
	LY6E	2.01138e+07	1.58923e-16	2.58278e-15	0.318953	-3.13526											TMEM134	936508	0.000392225	0.00224227	0.464057	-2.15491
	GM11709	14884.1	0.00126433	0.00599195	0.318796	-3.1368											CSF2RA	1.97566e+06	0.00467633	0.0192295	0.463182	-2.15898
	PAQR5	16861.7	3.76026e-10	4.14003e-09	0.318123	-3.14344											SLC15A3	461552	0.00330449	0.0143035	0.461025	-2.16908
	GIMAP1	37077.3	1.96029e-07	1.67773e-06	0.311508	-3.21019											IDH3G	1.00401e+06	8.89255e-05	0.000599688	0.459879	-2.17448
	MS4A3	71404.6	0.0121411	0.0432694	0.310232	-3.22339											GM10250	39361.3	2.36935e-05	0.000177973	0.459725	-2.17521
	BC147527	94485.2	4.76645e-05	0.000299504	0.305519	-3.27312											P4HB	859568	0.000124229	0.000810262	0.459631	-2.17566
	SDF2L1	2.38863e+06	1.57501e-08	1.50863e-07	0.303412	-3.29585											MDH1	1.85118e+06	0.000105747	0.00070373	0.458868	-2.17928
	LEPREL1	81676.2	4.90209e-10	5.32752e-09	0.301051	-3.3217											CYTH4	2.41268e+06	0.00063824	0.00342916	0.458848	-2.17937
	HSPB1	225613	6.75413e-16	1.06822e-14	0.298803	-3.34669											PIK3R3	8571.96	0.00662991	0.0258273	0.457338	-2.18657
	CEBPB	1.41691e+07	2.09047e-05	0.000139118	0.289512	-3.45409											KPNA4	323842	0.00960259	0.0351611	0.456905	-2.18864
	XBP1	1.34531e+06	1.70848e-10	1.93155e-09	0.285513	-3.50246											CCDC3	15469.2	0.000222511	0.00136802	0.456854	-2.18888
	GIMAP6	86814.4	5.50734e-11	6.44479e-10	0.278049	-3.59649											ADRB2	566845	0.000123668	0.000806901	0.456727	-2.18949
	IL4	8390.4	0.001108	0.00532959	0.27402	-3.64937											SOX6	15661.9	0.00690258	0.0267071	0.454755	-2.19899
	CISH	21398.1	0.00157342	0.00727353	0.271954	-3.67709											LTBP1	20329.3	2.51189e-14	4.83826e-13	0.453966	-2.20281
	EMR4	30599.2	4.54478e-05	0.000287003	0.268817	-3.72											SULF1	25787	3.52122e-06	3.07126e-05	0.453864	-2.2033
	SLAMF7	108591	1.14355e-06	9.04307e-06	0.262002	-3.81676											CSK	944615	0.000333457	0.00195367	0.453434	-2.20539
	GIMAP5	22458.7	6.59655e-14	9.24982e-13	0.259936	-3.8471											NAPA	890488	0.00267022	0.0118571	0.451829	-2.21323
	BC049352	33151.4	3.98422e-05	0.000254264	0.258347	-3.87077											COMMD8	1.48531e+06	4.32391e-05	0.000310164	0.45169	-2.21391
	HIST4H4	53578.5	0.00440469	0.0180036	0.254975	-3.92196											RAC2	4.08222e+06	1.34749e-06	1.26199e-05	0.451172	-2.21645
	MFAP4	12930.2	1.54019e-05	0.000104987	0.254282	-3.93264											UFC1	901623	1.36078e-05	0.000106797	0.45046	-2.21995
	ACE	14420.9	5.45918e-06	3.98716e-05	0.252457	-3.96107											TMEM14C	1.67909e+06	2.20902e-07	2.32638e-06	0.450299	-2.22075
	IIGP1	280326	2.34636e-06	1.78675e-05	0.250793	-3.98735											NFKBIZ	1.10092e+06	2.26557e-07	2.38168e-06	0.449792	-2.22325
	H2-Q6	132681	1.85398e-05	0.000124694	0.24479	-4.08513											CCND2	555280	0.00171686	0.00811047	0.449587	-2.22426
	SIGLECH	237291	1.88152e-22	4.03751e-21	0.244418	-4.09135											GPSM3	1.65362e+06	2.02864e-06	1.83856e-05	0.449152	-2.22642
	SKINT3	35952	8.81865e-05	0.000531645	0.242248	-4.128											SNX17	949752	0.00872068	0.0324356	0.448949	-2.22742
	IL1RL1	27322.6	1.00946e-05	7.04667e-05	0.226449	-4.416											THRA	205470	2.94639e-07	3.04489e-06	0.448283	-2.23074
	ASGR2	66844.3	8.16872e-09	8.08731e-08	0.223786	-4.46855											EBI3	301800	7.79662e-06	6.44205e-05	0.448256	-2.23087
	GM10073	514010	2.0284e-27	5.0802e-26	0.216495	-4.61904											GSTM1	415301	0.00230838	0.0105144	0.446421	-2.24004
	MGL2	5.18675e+06	1.77784e-95	7.80042e-94	0.216036	-4.62885											CHMP2A	1.507e+06	8.6203e-07	8.27493e-06	0.446088	-2.24171
	TRF	1.37523e+07	9.49585e-47	3.65808e-45	0.210943	-4.74062											ADAM33	270194	7.65894e-07	7.44096e-06	0.445689	-2.24372
	5830416P10RIK	12583.9	0.000416625	0.00218728	0.207578	-4.81748											IL1B	8.12201e+06	0.00059113	0.00320526	0.445608	-2.24413
	GM20429	18507.8	3.23103e-05	0.000208812	0.186901	-5.35043											SDHB	1.70262e+06	1.97634e-07	2.09632e-06	0.443371	-2.25545
	LCK	34018	0.0114037	0.0409421	0.18506	-5.40367											GUSB	2.01149e+06	2.86196e-05	0.00021156	0.443212	-2.25626
	CD209B	17771.6	0.000676109	0.00340167	0.184934	-5.40732											HFE	2.48524e+06	0.0139452	0.0481411	0.442353	-2.26064
	LYZ2	4.2527e+08	6.12855e-124	2.79291e-122	0.18055	-5.53863											P2RY6	2.29203e+06	0.00528226	0.021271	0.442095	-2.26196
	TGTP2	32884.6	0.000199667	0.00112401	0.176753	-5.65762											TMEM176A	5.33731e+06	4.23174e-09	5.54361e-08	0.441784	-2.26355
	GBP4	45759.8	0.00205716	0.00923218	0.152153	-6.57233											BAG1	1.56232e+06	6.89518e-12	1.13944e-10	0.441109	-2.26701
	XCL1	24359.7	0.0114	0.0409371	0.146315	-6.83455											ATP6V1E1	1.19483e+06	0.00589599	0.0234013	0.438682	-2.27955
	NKG7	120170	0.00800931	0.0302867	0.142189	-7.03291											EMG1	1.10327e+06	0.00352666	0.0150953	0.438242	-2.28185
	PLA2G2D	132643	1.14855e-27	2.90955e-26	0.133587	-7.48577											COPZ1	918582	0.00298329	0.0130797	0.437643	-2.28497
	GM20513	13083.9	8.71012e-10	9.30588e-09	0.128449	-7.7852											MAPRE1	1.10431e+06	0.004546	0.018759	0.437623	-2.28507
	GIMAP4	63220.4	2.84015e-11	3.4024e-10	0.127119	-7.86664											CD1D1	59317.4	0.000345223	0.00201062	0.437093	-2.28784
	SKAP1	33370.8	0.00999644	0.0366488	0.117532	-8.50831											KLF13	720929	0.00916507	0.0338342	0.436691	-2.28995
	MMP13	38814.8	7.31039e-21	1.45566e-19	0.0941894	-10.6169											REL	129016	0.000466179	0.00260524	0.435108	-2.29828
	EAR2	132580	1.15535e-07	1.01737e-06	0.0908493	-11.0072											NTRK2	206613	0.000296981	0.00176274	0.435034	-2.29867
	TRBC2	103014	0.0113889	0.0409056	0.0491722	-20.3367											TUBB2A	1.20654e+06	0.00521889	0.0210441	0.434298	-2.30257
	RETNLA	317214	3.12793e-11	3.74209e-10	0.0242512	-41.2351											PSMB1	2.45917e+06	3.60722e-05	0.000262373	0.434261	-2.30276
	CCL17	226131	0.000189238	0.0010687	0.0210982	-47.3974											CD300LD	424886	0.000441288	0.00248657	0.432668	-2.31124
																	PPP4C	1.40801e+06	9.10833e-06	7.40475e-05	0.432119	-2.31418
																	SERPING1	385611	0.000629705	0.00338742	0.43204	-2.3146
																	GM26522	298107	0.000273008	0.00163972	0.430047	-2.32533
																	LAPTM4B	182913	8.10227e-09	1.02478e-07	0.427517	-2.33909
																	NECAP2	1.622e+06	3.51838e-06	3.07068e-05	0.426695	-2.34359
																	AKR1B3	1.56866e+06	0.00028231	0.00168699	0.426154	-2.34657
																	HES5	23593.2	3.54607e-07	3.62647e-06	0.425838	-2.34831
																	IGF1	960216	0.000320637	0.00188606	0.425696	-2.34909
																	PINK1	384120	0.00072508	0.00382712	0.424768	-2.35422
																	MRC1	3.31212e+06	1.13356e-05	9.04491e-05	0.422866	-2.36481
																	CAMK1	2.54433e+06	0.0089474	0.0331742	0.422432	-2.36725
																	DLK1	8977.36	3.1031e-08	3.67017e-07	0.422009	-2.36962
																	RUNX1	511603	4.92363e-05	0.000349637	0.421622	-2.37179
																	AP2M1	2.52644e+06	7.87295e-09	9.97203e-08	0.421191	-2.37422
																	D730003I15RIK	78782.6	0.00662199	0.0258078	0.421084	-2.37482
																	PRELID1	1.7762e+06	5.76852e-11	8.83874e-10	0.420386	-2.37877
																	VDAC2	2.21438e+06	0.00036081	0.00208696	0.420321	-2.37913
																	RNH1	1.47492e+06	3.28958e-07	3.37197e-06	0.420239	-2.3796
																	CD209B	17771.6	0.00741144	0.0283227	0.42022	-2.3797
																	PLIN2	2.43999e+06	0.00537444	0.0215826	0.420155	-2.38007
																	GPR183	880223	0.00296623	0.013016	0.419848	-2.38181
																	M6PR	1.6742e+06	0.00142121	0.0068736	0.418498	-2.3895
																	UBE2D3	3.29424e+06	0.00197263	0.00915244	0.415192	-2.40853
																	PITPNA	2.52489e+06	1.87234e-05	0.000143133	0.414898	-2.41023
																	LY86	6.28713e+06	0.00281617	0.0124416	0.414486	-2.41262
																	FAM96A	1.73197e+06	3.97545e-08	4.64906e-07	0.413888	-2.41611
																	GM10116	2.19853e+06	7.01931e-09	9.00692e-08	0.413354	-2.41923
																	GAS7	856790	0.00026414	0.00159078	0.413145	-2.42046
																	TXNIP	1.62452e+06	7.44103e-05	0.000508787	0.412445	-2.42457
																	ASGR2	66844.3	0.0011781	0.00584982	0.412092	-2.42664
																	MLF2	1.31323e+06	0.000178923	0.00112411	0.411988	-2.42726
																	SERBP1	2.27849e+06	0.000345067	0.00201037	0.408861	-2.44582
																	CLEC4A2	3.65201e+06	1.27457e-05	0.000100792	0.408571	-2.44756
																	TGFB1	2.27193e+06	0.000432471	0.00244468	0.408363	-2.4488
																	CCL6	3.40216e+06	6.7258e-05	0.000464851	0.407456	-2.45425
																	DUSP1	7.48278e+06	1.93522e-07	2.05394e-06	0.407399	-2.4546
																	BMP2	92670.9	0.000972199	0.00494262	0.406933	-2.45741
																	MTCH1	1.18261e+06	4.85882e-05	0.000345312	0.405634	-2.46528
																	RAB3IL1	2.00573e+06	0.0132481	0.0461855	0.405537	-2.46587
																	GLRX3	1.11892e+06	0.00125216	0.00617075	0.405069	-2.46872
																	CORO1B	1.70026e+06	0.000499317	0.00276509	0.403431	-2.47874
																	RPL13-PS3	136826	1.59052e-05	0.000122757	0.402955	-2.48167
																	LPAR6	827863	1.44733e-05	0.000112746	0.402458	-2.48473
																	SLC15A2	158848	2.57243e-05	0.000191883	0.401628	-2.48987
																	SSBP4	921356	0.0064584	0.0252873	0.40117	-2.49271
																	GDF15	229497	0.00937549	0.0344939	0.400998	-2.49378
																	GPR65	881977	0.00407769	0.0170655	0.399393	-2.5038
																	LILRA5	941085	3.39673e-12	5.7038e-11	0.398185	-2.51139
																	PHB2	1.49926e+06	2.03833e-06	1.8464e-05	0.39789	-2.51326
																	LY96	368311	6.18251e-08	7.02114e-07	0.397872	-2.51337
																	OSTF1	3.57618e+06	0.000227412	0.0013938	0.395693	-2.52721
																	ATP6V0B	3.8369e+06	0.000810964	0.00421873	0.395555	-2.5281
																	PSMB9	2.27541e+06	0.0140989	0.0485863	0.394737	-2.53333
																	ZFP420	16197.7	0.0124082	0.043662	0.394328	-2.53596
																	PPP1CC	1.71236e+06	0.00147693	0.00711388	0.394245	-2.53649
																	ADRB1	32431.6	0.010989	0.0394408	0.392846	-2.54553
																	EMR4	30599.2	0.00151123	0.00726527	0.391677	-2.55313
																	DLEU2	504767	5.66783e-11	8.70709e-10	0.389685	-2.56618
																	PPP1CA	4.26629e+06	7.72643e-05	0.000527079	0.389543	-2.56711
																	SLCO2B1	639481	0.000300956	0.00178574	0.386713	-2.58589
																	DDAH2	337738	8.86902e-07	8.50445e-06	0.386705	-2.58595
																	CD86	1.21706e+06	0.000713586	0.00377823	0.386087	-2.59009
																	ST3GAL6	731800	5.84306e-10	8.33874e-09	0.385984	-2.59078
																	JUND	7.2359e+06	3.15411e-15	6.41046e-14	0.385822	-2.59187
																	2700060E02RIK	2.4609e+06	0.000352711	0.00204547	0.384773	-2.59894
																	COPE	1.57039e+06	0.0118765	0.0421093	0.384497	-2.6008
																	ZFP36	5.64636e+06	3.8062e-07	3.86345e-06	0.384374	-2.60163
																	MAP3K8	287837	4.13939e-05	0.000298137	0.383748	-2.60587
																	PPP1R18	1.1962e+06	0.0111101	0.0398395	0.383558	-2.60717
																	ACRBP	17329.4	0.00740791	0.0283153	0.383466	-2.60779
																	SLC25A11	1.12816e+06	0.00135368	0.00657756	0.383185	-2.60971
																	EPHB2	9602.95	0.00173735	0.00818499	0.38317	-2.60981
																	TNFRSF17	55083.4	0.000735234	0.00387493	0.379286	-2.63653
																	FAM46A	791091	1.49734e-05	0.000116276	0.377479	-2.64916
																	FCRLS	1.68738e+07	9.04283e-10	1.268e-08	0.37707	-2.65203
																	CYBB	2.08998e+06	1.52752e-07	1.64192e-06	0.375971	-2.65978
																	MEF2C	1.25278e+06	0.000117053	0.000767706	0.375824	-2.66082
																	BTG2	4.24443e+06	3.56027e-09	4.71556e-08	0.375411	-2.66375
																	DAB2	4.49953e+06	0.000207755	0.0012858	0.3753	-2.66453
																	KLF2	3.06571e+06	0.00859896	0.0320571	0.375286	-2.66464
																	MS4A6C	8.29656e+06	8.50928e-05	0.0005767	0.375123	-2.66579
																	DCTN2	1.01176e+06	0.0037465	0.0159149	0.374741	-2.66851
																	LIMD2	2.98203e+06	0.0134327	0.0466911	0.373521	-2.67723
																	NISCH	1.05976e+06	0.00587798	0.0233456	0.371823	-2.68945
																	TPI1	2.03237e+06	6.6584e-05	0.000460617	0.371699	-2.69035
																	CCDC106	44516	0.000420198	0.00238521	0.370896	-2.69618
																	TMEM176B	8.4736e+06	2.80125e-14	5.37804e-13	0.366609	-2.7277
																	LCP1	6.54617e+06	0.00096626	0.00491525	0.364373	-2.74444
																	GM13479	18248.8	0.00361227	0.0154355	0.364133	-2.74625
																	DGKG	12574.4	0.0101359	0.036741	0.36413	-2.74627
																	EMR1	4.08289e+06	0.000355495	0.00206026	0.363192	-2.75337
																	CD48	2.6317e+06	0.00414831	0.0173201	0.363117	-2.75393
																	AXL	846220	0.00279125	0.0123449	0.363025	-2.75463
																	LPL	286461	5.54111e-08	6.32524e-07	0.362183	-2.76104
																	GPR34	1.42873e+06	9.48826e-07	9.04916e-06	0.361364	-2.76729
																	SAMD4	33415.5	0.00762893	0.0289909	0.360531	-2.77368
																	IGF1OS	7030.82	0.014095	0.0485863	0.358101	-2.79251
																	PSMB10	2.17209e+06	0.0118802	0.0421093	0.356525	-2.80485
																	PTTG1IP	524176	0.00114621	0.00571554	0.35581	-2.81049
																	CLEC2D	190861	3.33359e-07	3.41509e-06	0.354958	-2.81723
																	MGST2	19839.2	0.00625976	0.024646	0.353704	-2.82722
																	CD36	883445	8.21785e-09	1.03717e-07	0.353647	-2.82768
																	CYBA	9.80118e+06	1.46226e-71	5.38661e-70	0.35232	-2.83833
																	EGFL7	205603	0.000224369	0.00137753	0.352188	-2.83939
																	SNX5	4.5766e+06	0.00119059	0.00590686	0.351642	-2.8438
																	EIF3M	1.76156e+06	2.00314e-06	1.81731e-05	0.349966	-2.85742
																	LEPREL1	81676.2	4.90348e-08	5.65579e-07	0.349524	-2.86103
																	SIGLECH	237291	6.48819e-19	1.5358e-17	0.34749	-2.87778
																	A930007I19RIK	51924.8	0.00979349	0.0357638	0.346787	-2.88361
																	HEXB	1.11894e+07	0.000244078	0.00148425	0.346427	-2.88661
																	BLVRB	2.25145e+06	0.00355468	0.0152078	0.34393	-2.90757
																	GM5475	9716.76	0.00305474	0.0133566	0.341441	-2.92876
																	TMCC1	316612	2.1898e-08	2.63044e-07	0.33867	-2.95272
																	ATF3	3.5481e+06	1.53658e-06	1.42101e-05	0.335967	-2.97648
																	CX3CR1	3.32616e+06	4.0124e-05	0.000289581	0.335953	-2.9766
																	ACTR3	6.14907e+06	4.20441e-05	0.000302328	0.335656	-2.97924
																	YWHAH	4.57467e+06	0.00542413	0.0217482	0.335232	-2.98301
																	IER3	1.50743e+06	7.59347e-09	9.68045e-08	0.334298	-2.99134
																	GMFG	2.14979e+06	4.11347e-12	6.86821e-11	0.33404	-2.99365
																	GDPD3	56331.5	0.00543772	0.0217829	0.332962	-3.00335
																	PLD4	6.74043e+06	2.15216e-05	0.000162695	0.332026	-3.01181
																	RGS10	6.75346e+06	6.4735e-09	8.36117e-08	0.328634	-3.04289
																	MPV17L	34398.4	0.000145493	0.000934858	0.32834	-3.04562
																	NFKBIA	5.05088e+06	7.58995e-08	8.54812e-07	0.326984	-3.05825
																	RAB11FIP4OS1	8237.47	0.00263689	0.0117467	0.326521	-3.06259
																	MS4A7	6.76278e+06	1.32863e-16	2.91475e-15	0.32637	-3.06401
																	GM26764	7228.98	0.00316102	0.0137532	0.325973	-3.06774
																	BCL2A1B	3.10995e+06	7.09853e-12	1.17086e-10	0.325238	-3.07467
																	ERGIC3	1.87084e+06	0.0115177	0.0410941	0.32429	-3.08366
																	EAF2	11897.6	0.00483734	0.0197675	0.324142	-3.08507
																	SRGN	6.02931e+06	8.66208e-06	7.08432e-05	0.322667	-3.09917
																	CD53	5.79192e+06	1.13312e-14	2.23365e-13	0.321349	-3.11188
																	CD68	7.94247e+06	2.64065e-07	2.75104e-06	0.320971	-3.11555
																	RPS10-PS1	109860	0.00034571	0.00201213	0.320838	-3.11684
																	IMPACT	189447	8.47513e-08	9.49065e-07	0.318269	-3.14199
																	RGS2	2.53777e+06	0.000716151	0.00378791	0.317718	-3.14745
																	TSLP	45370.4	0.00308904	0.0134899	0.316673	-3.15783
																	C3AR1	2.54868e+06	1.24829e-07	1.36332e-06	0.316592	-3.15864
																	SERPINF1	1.06724e+06	6.06611e-09	7.85219e-08	0.313377	-3.19105
																	BST2	5.83971e+06	4.92556e-07	4.91777e-06	0.312059	-3.20452
																	PNRC1	1.55931e+06	8.53453e-10	1.20054e-08	0.31109	-3.21451
																	SLC40A1	124119	0.00803728	0.0302953	0.310546	-3.22013
																	EIF3F	6.56186e+06	0.00179593	0.00842997	0.306984	-3.2575
																	CXCL2	6.69871e+06	6.03749e-07	5.94403e-06	0.302849	-3.30197
																	IL1RL1	27322.6	0.000122246	0.000799096	0.302519	-3.30557
																	RNASE4	3.90915e+06	0.000348134	0.00202357	0.301038	-3.32184
																	HPGD	1.96197e+06	6.44288e-22	1.69846e-20	0.300713	-3.32543
																	TNFSF13OS	19198.2	0.0143156	0.0492469	0.299928	-3.33413
																	FCGR3	1.44577e+07	2.39955e-24	6.68172e-23	0.294938	-3.39055
																	CD83	3.82937e+06	1.75337e-17	3.95448e-16	0.293597	-3.40603
																	GM26532	123289	2.7398e-07	2.8447e-06	0.293124	-3.41153
																	TMCC3	274258	2.1257e-15	4.37563e-14	0.291787	-3.42716
																	IL4	8390.4	0.0029062	0.012783	0.291513	-3.43038
																	CTSC	2.91232e+07	1.34307e-45	4.67482e-44	0.290298	-3.44474
																	AIF1	7.41367e+06	3.04139e-27	8.94807e-26	0.288071	-3.47137
																	LAPTM5	9.06179e+06	2.5843e-14	4.96691e-13	0.287431	-3.47909
																	IFNGR1	4.1339e+06	3.98143e-20	9.87373e-19	0.285246	-3.50575
																	FXYD2	101519	9.10145e-06	7.40475e-05	0.282655	-3.53788
																	H2-DMB1	7.20161e+06	8.4697e-21	2.17045e-19	0.281845	-3.54804
																	GM20703	39803.3	0.00234706	0.0106423	0.2801	-3.57016
																	HCST	252336	7.20913e-09	9.21705e-08	0.279219	-3.58141
																	CXCL16	5.52531e+06	0.00565799	0.0225936	0.274657	-3.6409
																	CSF1R	8.28545e+06	1.6931e-28	5.16161e-27	0.273712	-3.65347
																	PID1	3.86103e+06	6.43703e-15	1.29194e-13	0.271835	-3.6787
																	GM10036	120791	3.84038e-07	3.8959e-06	0.266903	-3.74669
																	GM7536	114177	1.56471e-05	0.000121029	0.265774	-3.7626
																	PTPN18	2.56167e+06	3.64657e-41	1.24958e-39	0.263468	-3.79553
																	NINJ1	2.41511e+06	9.94121e-07	9.46074e-06	0.261704	-3.82112
																	RHOB	1.94547e+06	2.53426e-10	3.72803e-09	0.261321	-3.82671
																	RPL5	5.94332e+06	0.000108483	0.000718693	0.258978	-3.86133
																	CCL2	5.36386e+06	0.0119489	0.0423068	0.257959	-3.87658
																	CTSA	5.45544e+06	3.7231e-13	6.64296e-12	0.256541	-3.898
																	LY6E	2.01138e+07	1.4762e-13	2.69929e-12	0.256537	-3.89807
																	HERPUD1	1.00128e+06	3.2928e-11	5.13887e-10	0.254141	-3.93483
																	SPIC	75805.4	4.08764e-05	0.00029489	0.25362	-3.94291
																	COX7A2L	6.19021e+06	7.39126e-05	0.000505775	0.253353	-3.94707
																	GM11709	14884.1	0.000293251	0.00174588	0.252673	-3.95768
																	CD14	7.59721e+06	6.61273e-21	1.70198e-19	0.251129	-3.98202
																	ADAP2OS	341109	2.26326e-15	4.64257e-14	0.245216	-4.07803
																	CCL3	5.76853e+06	7.86278e-20	1.92829e-18	0.243264	-4.11075
																	EAR2	132580	9.91943e-05	0.00066312	0.23803	-4.20114
																	LGMN	2.88279e+07	1.32356e-29	4.08433e-28	0.236891	-4.22135
																	LST1	2.17471e+06	8.35344e-45	2.90188e-43	0.23524	-4.25097
																	KLF6	4.94563e+06	9.8751e-18	2.25015e-16	0.234988	-4.25553
																	IER5	4.85709e+06	5.18754e-16	1.10647e-14	0.230311	-4.34195
																	UNC93B1	1.04014e+07	4.47741e-39	1.52249e-37	0.228701	-4.37252
																	BC049352	33151.4	6.43967e-06	5.38629e-05	0.227304	-4.3994
																	MGL2	5.18675e+06	2.13071e-53	7.53505e-52	0.226992	-4.40543
																	CCL4	1.00347e+07	1.34451e-12	2.32539e-11	0.226973	-4.40581
																	H2-DMA	1.16561e+07	3.36372e-37	1.12646e-35	0.225505	-4.43449
																	TNFRSF1A	1.43776e+06	0.000493372	0.00273817	0.222429	-4.49582
																	S100A8	493922	1.20165e-05	9.53236e-05	0.214472	-4.66261
																	CTSH	1.27631e+07	1.33026e-63	4.82001e-62	0.205607	-4.86366
																	CCL12	7.9729e+06	3.20958e-07	3.30336e-06	0.205479	-4.86667
																	CD52	9.47161e+06	2.95993e-80	1.09493e-78	0.205034	-4.87724
																	GM20513	13083.9	8.35247e-08	9.35921e-07	0.204733	-4.88441
																	FCER1G	2.48133e+07	5.63046e-195	2.23725e-193	0.201449	-4.96403
																	GM13166	14918.4	0.000401532	0.00228881	0.201275	-4.96833
																	CCL24	342709	1.05958e-14	2.1004e-13	0.197569	-5.06152
																	TYROBP	1.74879e+07	8.45353e-213	3.39717e-211	0.191106	-5.2327
																	HSPA1A	8.43644e+06	9.07196e-24	2.47166e-22	0.190319	-5.25433
																	GM6133	68760.6	0.000109799	0.000725751	0.183863	-5.43882
																	S100A9	357405	0.000851553	0.00440139	0.183669	-5.44457
																	CD300LH	54804.9	4.70031e-08	5.43564e-07	0.182967	-5.46547
																	RPS18-PS3	74113.6	0.00241717	0.0109199	0.174994	-5.71447
																	CEBPB	1.41691e+07	9.89772e-16	2.07606e-14	0.172066	-5.81172
																	PF4	1.23043e+07	1.6625e-38	5.63147e-37	0.156143	-6.4044
																	CCL17	226131	0.00331096	0.0143245	0.155207	-6.44301
																	MMP13	38814.8	6.75709e-18	1.54765e-16	0.152614	-6.55249
																	TRF	1.37523e+07	4.94554e-79	1.82562e-77	0.130692	-7.65159
																	PLA2G2D	132643	3.0579e-27	8.9817e-26	0.124845	-8.00995
																	C1QC	1.17675e+08	6.77928e-53	2.39264e-51	0.121321	-8.24261
																	RETNLA	317214	0.000145532	0.000934858	0.101848	-9.81854
																	H2-EB1	1.99175e+08	8.89508e-84	3.29733e-82	0.0957321	-10.4458
																	CTSS	1.22341e+08	8.71679e-283	3.60118e-281	0.0942095	-10.6146
																	H2-AA	2.62619e+08	6.54094e-94	2.43488e-92	0.0870856	-11.483
																	C1QB	1.85246e+08	3.36457e-68	1.23172e-66	0.0847245	-11.803
																	C1QA	2.04626e+08	1.6213e-70	5.96004e-69	0.0783785	-12.7586
																	H2-AB1	4.27965e+08	1.32938e-109	5.00128e-108	0.0618158	-16.1771
																	CD74	1.60242e+09	2.52906e-157	9.87171e-156	0.056577	-17.675
																	RETNLG	151926	0.014001	0.0483055	0.0520533	-19.2111
																	LYZ2	4.2527e+08	0	0	0.0431775	-23.1602

## Sheet: Image analysis
CD68 expression area						Ki67 positive cells					Ki67+CD68/Ki67%
NAI	SNC	DRC	SCI			NAI	SNC	DRC	SCI		NAI	SNC	DRC	SCI
15.6379	19.7836	11.6407	18.3287			282.006	4259.77	1401.97	702.572		68.75	78.7611	72.8682	81.6327
6.52201	34.4475	21.5208	7.04064			285.954	7218.79	3595.65	415.105		80	87.3065	70	90.2439
10.6278	36.3145	33.1314	15.3861			261.016	3947.24	2362.18	558.938		78.9474	77.4566	79.2	65.625
12.7848	21.8711	12.6956	23.8073			1312.08	2658.64	1950.3	799.528		95.8904	86.8687	82.4818	85
7.32516	18.9391	14.761				397.713	2819.96	1158.79			84	78.1726	91.6667

## Sheet: qPCR
qPCR	Naïve	SNC
CD74	1	0.058	0.13	0.085
H2-Aa	1	0.56	0.766	0.473
Ctss	1	0.457	0.532	0.127
Ccl2	1	0.083	0.029	0.24
Il1b	1	0.221	0.053	0.917
Tnf	1	0.552	0.102	0.788
Ki67	1	2.042	3.94	1.902

## Sheet: Ki67 in scRNAseq
	Macrophage	SGC	T-cell	Pericytes	Schwann	Mesencymal	Endothelial
NAI	25.5814	62.7907	6.97674	2.32558	2.32558	0	0
SNC	81.6667	11.6667	1.66667	1.66667	1.66667	1.66667	0
DRC	66.6667	21.2121	0	0	3.0303	0	9.09091
SCI	66.6667	18.1818	12.1212	0	0	0	3.0303
