# Supplementary material for: Profiling sensory neuron microenvironment after peripheral and central axon injury reveals key pathways for neural repair
Source: eLife. 2021 Sep 29;10:e68457. doi: 10.7554/eLife.68457 (PMC8480984; doi:10.7554/eLife.68457)
Supplement: Figure 4—source data 1. [file elife-68457-fig4-data1.xlsx]

## Sheet: Unique genes Imoonglia
Immune glia		Immune glia p-value	Immune glia fold change	Macrophage(New)	Macrophage(New) p-value	Macrophage(New) fold change	SGC	SGC p-value	SGC fold change		61 common elements in "Immune glia" and "SGC":	863 common elements in "Immune glia" and "Macrophage":	168 elements included exclusively in "Immune glia":
	MRC1	0	5.12927	CCL4	0	68.056	FABP7	0	19.1557		PLP1	MRC1	MARCKS
	PF4	0	4.51287	CCL3	0	61.855	BCAN	0	17.9359		APOE	PF4	MERTK
	F13A1	0	4.11475	H2-AA	0	58.1284	RP24-247B20.1	0	17.7614		ITGB8	F13A1	ARID1A
	FCRLS	0	3.67793	CD74	0	58.0737	MMD2	0	16.746		SYT11	FCRLS	WDR26
	MS4A7	0	3.46954	BCL2A1B	0	56.0256	ACSBG1	0	16.1263		PMEPA1	MS4A7	SBF2
	CSF1R	0	3.23387	CCR2	0	55.8836	LRRTM1	0	15.9333		TANC2	CSF1R	ULK2
	STAB1	7.08255116E-315	4.74867	H2-EB1	0	55.2141	DHRS2	0	15.9271		CELA1	STAB1	AMDHD2
	MS4A6C	1.80785e-305	2.93895	LY86	0	54.1721	TEX40	0	14.715		SCD2	MS4A6C	WDFY3
	C1QC	9.1092e-304	3.55355	RGS1	0	53.6413	GM2115	0	14.5508		ALDOC	C1QC	CNOT6
	FCGR3	1.99378e-298	3.23449	CTSS	0	52.7602	LECT1	0	14.1487		QK	FCGR3	GNA12
	MS4A6B	3.61492e-286	3.37509	SIRPB1C	0	50.6915	TYRP1	0	13.9416		KCNJ10	MS4A6B	KANSL1
	TYROBP	5.34372e-285	2.71045	H2-AB1	0	49.4938	RLBP1	0	13.1296		TAB2	TYROBP	ADAM9
	FCER1G	1.34366e-275	2.8263	CCL12	0	48.7832	LRRC4C	0	12.8543		DST	FCER1G	BACH1
	CBR2	7.98338e-275	4.74138	BCL2A1D	0	45.8064	TTYH1	0	12.8228		FOXD3	CBR2	2610507B11RIK
	LTC4S	1.85599e-274	4.25794	MS4A6C	0	43.9905	NKAIN4	0	12.6771		ITSN1	LTC4S	KDF1
	C1QB	2.62464e-270	3.08248	CXCL2	0	43.8504	ALDOC	0	12.576		SCD1	C1QB	RNF145
	C1QA	6.17905e-270	3.13845	IL1B	0	43.6623	SCG3	0	12.5588		SCG3	C1QA	FNIP1
	MGL2	9.27655e-268	3.14916	MS4A4C	0	42.4779	PRSS35	0	12.348		TNS3	MGL2	GM11638
	MS4A6D	6.83852e-267	3.45214	C1QA	0	42.368	SOX3	0	12.0439		CTTNBP2NL	MS4A6D	RAPH1
	AIF1	1.80281e-266	2.78352	C1QB	0	41.8917	GPR37L1	0	12.0202		FAM19A5	AIF1	DUSP7
	CX3CR1	1.89267e-263	3.95406	AIF1	0	41.5865	SOSTDC1	0	11.6515		HSD17B11	CX3CR1	TGFBRAP1
	CD68	2.74287e-260	3.06712	AF251705	0	40.8381	DBI	0	11.5066		COL27A1	CD68	4930599N23RIK
	CD163	2.79671e-260	5.15134	MGL2	0	39.7079	GM16133	0	11.4764		ABCA8B	CD163	GM22957
	CLEC4A2	3.02826e-260	3.11465	CD48	0	39.2922	RXRG	0	11.062		FAM102A	CLEC4A2	ZNFX1
	C5AR1	4.36867e-238	2.69114	FCGR1	0	38.9312	CMTM5	0	11.0593		POU3F1	C5AR1	ATXN7
	TREM2	7.64473e-237	3.03846	C1QC	0	38.9234	A930009A15RIK	0	10.9993		POU3F2	TREM2	CHP2
	LAPTM5	1.71805e-236	2.59028	CCL6	0	38.8193	KCNA6	0	10.8721		RAB31	LAPTM5	STARD9
	DAB2	5.65749e-236	3.18403	C3AR1	0	38.6376	BAI3	0	10.609		CDK19	DAB2	SETDB1
	CTSS	2.16574e-233	2.12153	WFDC17	0	38.5962	PCDH10	0	10.5851		GRAMD1B	CTSS	SENP8
	CLEC4N	2.042e-229	4.24009	CD86	0	38.104	GPM6B	0	10.5643		GM27031	CLEC4N	HS6ST1
	CCL12	4.19612e-226	2.84013	GM6377	0	37.7893	CYP2J9	0	10.4242		CIB2	CCL12	POU5F2
	CLEC4A1	5.24049e-226	3.30392	MS4A7	0	37.3205	FBLN5	0	10.4063		LRRC4B	CLEC4A1	KDM4A
	LST1	1.73151e-223	3.04933	CD83	0	37.2894	NCAM2	0	10.3103		PAG1	LST1	PPP1R3B
	TNFAIP8L2	3.736e-222	3.66868	MS4A6B	0	37.2458	PPP1R14C	0	10.303		SLC4A4	TNFAIP8L2	MTMR12
	RGS10	4.8008e-222	2.69982	CLEC4A3	0	37.0532	PPP1R1B	0	10.0436		LRRC4	RGS10	1700061E18RIK
	PTPN18	1.62884e-221	2.76348	CD53	0	36.8582	FADS6	0	10.042		LRP2	PTPN18	ATXN1L
	CD53	9.20778e-221	2.3441	PLD4	0	36.7229	PTPRZ1	0	9.98202		2210017G18RIK	CD53	MAML1
	LY86	4.31752e-218	2.52355	CSF1R	0	36.5903	LRRC4B	0	9.93879		PCDH10	LY86	ZMYM3
	PLD4	1.67993e-212	2.62595	CD68	0	36.5371	LGI4	0	9.86931		ENPP1	PLD4	E230001N04RIK
	CFP	1.1444e-209	3.30773	TREM2	0	36.4392	FAM19A5	0	9.84029		PTPRT	CFP	PPP1R14D
	AF251705	4.37195e-209	3.05429	MS4A6D	0	35.8492	CRABP1	0	9.73192		CRYBB1	AF251705	OCRL
	ALOX5AP	3.80448e-208	2.15128	APOC2	0	35.712	DLGAP1	0	9.7159		MTMR10	ALOX5AP	PLEKHG5
	EMR1	2.16939e-205	2.63954	CLEC4A1	0	35.3635	SHPK	0	9.48391		D8ERTD82E	EMR1	GM27201
	GPR34	1.78701e-202	3.36596	FCGR3	0	35.3218	P4HA3	0	9.38862		NPAS3	GPR34	GM27010
	P2RY6	2.09447e-200	3.34292	SELPLG	0	35.2996	CYP2J6	0	9.21732		CACNG4	P2RY6	C1QL1
	C3AR1	4.44499e-199	2.69807	CD14	0	35.2675	SLC35F1	0	9.15362		PARD6B	C3AR1	4930522L14RIK
	FCGR2B	4.49676e-196	2.76437	FCRLS	0	35.2175	ASPA	0	9.02151		SLC46A1	FCGR2B	AREL1
	SPI1	7.31146e-192	2.36624	EMR1	0	35.1857	DPYSL4	0	8.95005		GM26814	SPI1	RP24-319M18.1
	GMFG	1.69857e-189	2.53959	LYZ2	0	35.1218	POU3F2	0	8.90293		PROM2	GMFG	PSD3
	CD52	1.12383e-188	1.74295	PF4	0	35.0261	NLGN3	0	8.86681		DPF3	CD52	TBK1
	LCP1	1.4552e-186	2.22815	BCL2A1A	0	34.5106	KCNN4	0	8.84774		2010320O07RIK	LCP1	SIRT1
	CLEC4A3	2.43378e-186	2.77065	IRF5	0	34.3082	GPD1	0	8.69927		BRSK2	CLEC4A3	OAZ3
	LYZ2	5.63845e-186	2.3218	TYROBP	0	33.6788	CSDC2	0	8.6862		NCKAP5	LYZ2	RNF38
	FCGR1	2.18217e-176	2.80495	FCER1G	0	33.5861	MBOAT2	0	8.63139		HES7	FCGR1	GM9725
	HPGD	2.21918e-174	2.79405	GPR34	0	33.4463	ADAM23	0	8.61768		CDC42BPG	HPGD	UTP14B
	CCL8	1.60869e-172	5.01487	LAPTM5	0	33.4366	PLP1	0	8.59917		ZBTB5	CCL8	GM14302
	CD48	3.24622e-169	2.59974	FCGR4	0	33.3695	E130114P18RIK	0	8.58701		MYO16	CD48	ZFP646
	4632428N05RIK	3.16411e-165	2.64084	NAPSA	0	33.3211	SOX2	0	8.58234		FGF11	4632428N05RIK	TBC1D24
	HPGDS	2.13502e-164	3.63618	CLEC4B1	0	33.2629	NCAM1	0	8.5449		PCDH8	HPGDS	A830052D11RIK
	F630028O10RIK	2.11834e-162	4.54753	EVI2A	0	32.7254	EDNRB	0	8.54218		PLS1	F630028O10RIK	A530017D24RIK
	HMHA1	4.39427e-160	3.14627	GPR183	0	32.3364	FIGN	0	8.48624		TMEM88B	HMHA1	GPT
	CTSH	6.5451e-157	2.17489	CCL24	0	32.2526	CHADL	0	8.47308			CTSH	GM20634
	FYB	2.73344e-156	2.63009	LRRC25	0	32.2137	SLC43A3	0	8.43094			FYB	LNPEP
	SMAGP	1.05656e-155	2.88265	CD72	0	32.1673	TSPAN18	0	8.31184			SMAGP	ZSCAN18
	LILRA5	6.81354e-151	3.22413	LILRA5	0	31.8139	CTNND2	0	8.0976			LILRA5	UBIAD1
	UNC93B1	1.53031e-149	2.20382	SUSD3	0	31.7722	KCNH2	0	8.07475			UNC93B1	CMTM4
	CD84	8.11079e-149	3.15271	CCR5	0	31.7552	IGSF11	0	8.07024			CD84	GM14168
	IGHM	2.92176e-148	2.24026	LAT2	0	31.3773	TMPRSS5	0	8.04106			IGHM	MTHFR
	BCL2A1B	3.68743e-146	2.1965	TBXAS1	0	31.0667	LIX1	0	7.95942			BCL2A1B	ZFP791
	CYTH4	1.04799e-145	2.53321	RNASE6	0	30.9094	ERBB3	0	7.95772			CYTH4	ANO8
	LYL1	1.5536e-144	3.08096	GPR65	0	30.8159	LGR5	0	7.91232			LYL1	NUAK1
	TMEM106A	2.59295e-141	3.15834	CLEC12A	0	30.5997	HIST1H4H	0	7.81176			TMEM106A	2310014F06RIK
	CTLA2B	1.12099e-140	3.53411	LILRB4	0	30.4848	TMOD2	0	7.74014			CTLA2B	MSH5
	H2-DMA	2.16065e-139	1.86294	PLBD1	0	30.3263	LPAR1	0	7.71587			H2-DMA	PIGN
	LGMN	8.34693e-139	2.54898	EPSTI1	0	30.244	KCNJ10	0	7.48008			LGMN	ADAM3
	EVI2A	4.64974e-138	2.48181	CLEC4A2	0	30.0237	TM7SF2	0	7.44855			EVI2A	GM17168
	ARHGDIB	4.95238e-136	1.62141	SCIMP	0	29.9583	HEY2	0	7.38462			ARHGDIB	4931440F15RIK
	CTSC	9.98765e-136	2.4408	AI662270	0	29.8502	CADM1	0	7.3346			CTSC	1700028J19RIK
	FAM105A	4.19776e-135	2.58116	CD52	0	29.7994	METRN	0	7.30514			FAM105A	PIGB
	TM6SF1	7.20906e-135	2.41598	P2RY6	0	29.6512	PEX11A	0	7.29566			TM6SF1	ZFP369
	CD36	2.7887e-131	3.25854	CLEC10A	0	29.4811	ITGB8	0	7.29507			CD36	CTU1
	HCLS1	2.78769e-129	2.33701	TNFAIP8L2	0	29.3002	GM11837	0	7.22963			HCLS1	GM14033
	TMEM37	1.27957e-128	2.983	C5AR1	0	29.1558	PEX5L	0	7.19779			TMEM37	LIPH
	HFE	1.38496e-128	2.50321	F13A1	0	29.1399	CELSR2	0	7.14393			HFE	SLC39A12
	WFDC17	2.37019e-128	2.60824	CLEC7A	0	29.0475	PSPH	0	7.13162			WFDC17	C1GALT1
	CYBB	8.79745e-124	2.17559	SPI1	0	28.773	CHL1	0	7.12988			CYBB	GM26853
	CD14	2.18906e-123	1.66012	SLAMF9	0	28.6863	LPHN3	0	7.11349			CD14	GM17728
	NCKAP1L	7.47046e-123	3.68883	LST1	0	28.6316	INSC	0	7.0733			NCKAP1L	SETDB2
	NRROS	6.76769e-121	2.46751	HPGDS	0	28.4448	CSMD1	0	7.05018			NRROS	GM26714
	CORO1A	3.60049e-120	1.73021	POU2F2	0	28.1996	GPR126	0	7.03736			CORO1A	THADA
	MAF	1.2449e-119	2.65258	TAGAP	0	28.0212	CNTFR	0	7.03126			MAF	AI429214
	LRRC25	4.66695e-118	2.70151	LTC4S	0	27.5513	MEGF10	0	7.01959			LRRC25	LMLN
	RAC2	1.40601e-117	1.8029	IRF8	0	27.5305	ME1	0	6.97592			RAC2	NSUN3
	NTPCR	2.2056e-117	2.56048	PMAIP1	0	27.3318	PRNP	0	6.94096			NTPCR	NUP155
	EHD4	5.81968e-117	2.16783	MPEG1	0	27.2636	CDO1	0	6.81893			EHD4	GM16536
	PTPLAD2	4.77459e-115	2.67708	CD84	0	27.0886	HMGCS1	0	6.70272			PTPLAD2	GM16275
	CLEC10A	2.18845e-114	3.31667	LCP1	0	27.062	SQLE	0	6.7006			CLEC10A	CPA6
	LILRB4	4.04904e-113	2.44461	MSR1	0	26.9087	SHISA4	0	6.69392			LILRB4	GM5141
	CCL9	2.33168e-111	1.91076	KLRA2	0	26.7709	ZDHHC2	0	6.64758			CCL9	PHYHD1
	FGD2	1.91843e-110	2.97911	CD300A	0	26.6944	MATN4	0	6.63232			FGD2	GM15747
	MILR1	4.47762e-110	3.05283	HCLS1	0	26.458	FBXO2	0	6.62052			MILR1	RP23-32C18.5
	PLA2G7	3.59296e-109	2.15097	MILR1	0	26.4338	LCAT	0	6.56276			PLA2G7	ANKS6
	SUSD3	1.00937e-108	2.66937	BLNK	0	26.3881	TMEM229A	0	6.54959			SUSD3	KCTD21
	LY6E	4.4256e-108	1.58104	TNF	0	26.298	TST	0	6.5259			LY6E	AI606181
	PID1	5.02662e-108	1.93078	H2-DMA	0	26.2232	ARHGEF26	0	6.52171			PID1	E2F3
	CD74	8.60984e-106	1.83352	CX3CR1	0	26.2101	LGR4	0	6.4671			CD74	FGD6
	POU2F2	3.22627e-104	2.91432	MRC1	0	26.1421	SOGA3	0	6.46299			POU2F2	GM26606
	IFI27L2A	1.7893e-102	2.11764	SLA	0	26.017	PAQR6	0	6.43043			IFI27L2A	CD99
	GPR65	2.00577e-102	2.77328	IL21R	0	25.8618	FOXD3	0	6.4185			GPR65	GM26673
	SLFN2	2.52592e-102	2.18844	H2-OA	0	25.8592	PTN	0	6.40321			SLFN2	ADAT3
	CCR1	5.47781e-101	2.54961	CLEC4N	0	25.8551	VLDLR	0	6.39303			CCR1	POLR3G
	CYBA	5.76935e-101	1.84754	OSM	0	25.847	EDIL3	0	6.36555			CYBA	ZFP955B
	ARRB2	1.16384e-98	2.21215	PTPN18	0	25.6785	HMGCS2	0	6.34231			ARRB2	FSCN2
	RNASE4	1.85895e-98	1.80407	IL10RA	0	25.5824	ENHO	0	6.33398			RNASE4	GM25517
	FOLR2	3.94115e-98	4.14162	H2-DMB2	0	25.566	DHH	0	6.28569			FOLR2	PKD2L2
	CD300A	1.08796e-97	2.78203	FAM105A	0	25.3494	SOX10	0	6.25679			CD300A	GM10614
	INPP5D	1.28273e-97	3.0383	CYP4F18	0	25.3182	KCNMB4	0	6.24408			INPP5D	SMCR8
	PLA2G2D	1.79905e-97	4.94402	GLIPR1	0	25.0797	SLC9A3R1	0	6.23241			PLA2G2D	SERAC1
	CCL6	2.85966e-97	1.7864	CD300LD	0	24.888	SLC4A4	0	6.20109			CCL6	GM23412
	CD86	8.56883e-97	2.51924	BIN2	0	24.8706	COL28A1	0	6.18444			CD86	GM4788
	SLC9A9	8.79866e-97	3.22213	PHF11B	0	24.6748	CYP51	0	6.11213			SLC9A9	POLN
	IRF8	2.61122e-95	1.92046	IGSF6	0	24.6496	DCLK1	0	6.08721			IRF8	GM8994
	IGF1	6.22609e-93	1.98091	VAV1	0	24.4979	KIF21A	0	6.07476			IGF1	GM10767
	TBXAS1	6.86726e-93	2.79631	PYHIN1	0	24.368	ACSS2	0	6.04052			TBXAS1	FBXO10
	ANG	1.77556e-92	2.66158	CCR1	0	24.3199	GJC3	0	6.03135			ANG	RNFT2
	SIRPA	2.63217e-92	2.33142	CYBB	0	24.2817	KCTD1	0	5.96421			SIRPA	FAM83G
	FERMT3	1.06462e-91	2.59634	2020-03-01	0	24.2054	FBLN2	0	5.94981			FERMT3	GM26737
	SIGLECE	1.91408e-91	2.79327	TNFRSF13B	0	24.1949	SCD1	0	5.94683			SIGLECE	RP23-193A16.7
	LIMD2	1.13578e-89	1.96581	PTPN6	0	24.1833	FDPS	0	5.94091			LIMD2	ZFP873
	GPR183	1.40942e-89	2.75992	ALOX5AP	0	23.9573	SLC22A17	0	5.88933			GPR183	4930404N11RIK
	LAIR1	1.06634e-88	2.38858	CFP	0	23.949	RAP1GAP	0	5.88032			LAIR1	ZBTB39
	CCL24	2.47742e-88	2.50583	SNX20	0	23.609	TRIM2	0	5.81219			CCL24	LIPC
	CLTC	4.88017e-88	2.241	CORO1A	0	23.6046	PCDH9	0	5.7577			CLTC	MFSD9
	PTPN6	7.61014e-88	2.11388	CBR2	0	23.4219	ABCA8B	0	5.74896			PTPN6	CBLN3
	CD37	1.19689e-87	2.6468	PPFIA4	0	23.3081	CTNS	0	5.68265			CD37	GRHL1
	G530011O06RIK	2.80093e-87	2.27883	LPXN	0	23.2349	ZFP536	0	5.66857			G530011O06RIK	1700084C06RIK
	AI607873	7.74444e-87	2.80337	CD180	0	23.2079	CDH19	0	5.66446			AI607873	GM17491
	H2-AA	1.28671e-86	1.67966	DPEP2	0	23.1398	HEPACAM	0	5.66299			H2-AA	GM10615
	PYCARD	2.06582e-86	1.92072	LYL1	0	23.0275	SCD2	0	5.64962			PYCARD	ZFP384
	H2-AB1	2.42654e-85	1.59937	CYSLTR1	0	23.0054	FDFT1	0	5.60909			H2-AB1	GM5145
	CRLF2	3.50287e-85	2.1684	PTPRC	0	22.9237	CADM4	0	5.60206			CRLF2	GM15972
	H2-DMB1	7.92779e-85	1.69881	P2RY13	0	22.8777	FXYD1	0	5.58883			H2-DMB1	FAM84B
	MAN2B1	8.05128e-85	2.18346	GNA15	0	22.7641	WNT6	0	5.55035			MAN2B1	OLFR920
	AB124611	1.6331e-84	2.10069	CCL8	0	22.5259	TSPAN15	0	5.52975			AB124611	GM26624
	EPSTI1	2.38751e-84	2.48132	TIFAB	0	22.3517	ABHD3	0	5.49756			EPSTI1	ZFP850
	TLR7	2.64789e-84	3.72444	TLR2	0	22.2643	FBXO7	0	5.4946			TLR7	ZFP85OS
	FTL1	5.16692e-83	1.87905	FERMT3	0	22.2638	COL27A1	0	5.48983			FTL1	GM10644
	HMOX1	1.22112e-82	2.14068	SIRPB1B	0	22.0784	DHCR7	0	5.48834			HMOX1	FBXO45
	CD72	1.29921e-82	2.50818	SLAMF8	0	22.0325	MSMO1	0	5.46711			CD72	GM26525
	BLNK	3.0235e-82	2.84147	SIGLECE	0	21.8799	PHGDH	0	5.46171			BLNK	HINFP
	ZEB2OS	2.75499e-81	2.19904	ARL11	0	21.8621	NSDHL	0	5.44916			ZEB2OS	GABRR2
	ITGB5	2.90961e-81	1.84729	CD37	0	21.6227	KCNA1	0	5.42992			ITGB5	GM11574
	SNX5	1.09642e-78	1.91113	CLEC5A	0	21.4612	DIAP3	0	5.38752			SNX5	ZFP473
	MPEG1	1.2032e-78	2.18112	NEURL3	0	21.4513	TSPAN7	0	5.36075			MPEG1	TMEM170
	CD79B	3.77301e-78	3.19463	SLC15A3	0	21.4099	GRAMD1B	0	5.33667			CD79B	ZFP607
	CXCL16	4.02898e-78	1.78203	BC035044	0	21.3713	LYSMD2	0	5.33501			CXCL16	HYAL3
	IL10RB	4.89184e-78	1.70311	CD163	0	21.3463	SORBS1	0	5.33375			IL10RB	SAPCD1
	BLVRB	1.04132e-77	1.95818	HCK	0	21.3212	RGCC	0	5.33273			BLVRB	GM26894
	CCR5	5.56884e-77	2.55961	CD79B	0	21.2819	PCX	0	5.31424			CCR5	FHIT
	BASP1	9.48788e-77	1.98276	4632428N05RIK	0	21.1244	IDI1	0	5.30254			BASP1	9330104G04RIK
	HEXB	1.17549e-76	1.7326	RUNX3	0	21.1237	RSPH9	0	5.29655			HEXB	SLC18A2
	PLA2G15	1.39736e-76	2.35347	CD33	0	21.0382	MAPT	0	5.2885			PLA2G15	GPR143
	RAB3IL1	2.06263e-76	1.99188	AI607873	0	21.0201	FADS2	0	5.26929			RAB3IL1	E130309D14RIK
	GM26740	1.51408e-74	2.59643	FOLR2	0	20.9974	FBXO44	0	5.26883			GM26740	TYMP
	DSE	8.71186e-74	2.74672	FGD2	0	20.9937	FABP5	0	5.26467			DSE	GM15859
	LPCAT2	3.41864e-73	1.89	AOAH	0	20.9519	SFRP5	0	5.23385			LPCAT2	GM11214
	GRN	3.55484e-73	1.94422	H2-DMB1	0	20.9471	ABHD4	0	5.17266			GRN	CLGN
	SSH2	5.81883e-73	2.40766	CYTH4	0	20.7688	SYT11	0	5.07573			SSH2	HOXD11
	H2-EB1	8.02495e-73	1.58111	CYTIP	0	20.537	LYRM4	0	5.05801			H2-EB1
	LY96	1.48116e-72	2.23199	CCL9	0	20.4058	TMTC2	0	5.05258			LY96
	PTPRC	2.14106e-72	2.11952	GMFG	0	20.1702	TLCD1	0	5.04566			PTPRC
	IGSF6	3.07645e-72	2.33016	GPR132	0	20.0486	ART3	0	5.03658			IGSF6
	CLEC12A	3.71427e-72	1.7919	HMHA1	0	20.0009	GPR56	0	4.95211			CLEC12A
	GM10116	6.86218e-72	1.84368	SH2D1B2	0	19.9505	S1PR3	0	4.94332			GM10116
	NXPE5	1.69285e-70	3.74737	APBB1IP	0	19.6538	POSTN	0	4.94182			NXPE5
	ITGAM	1.92761e-70	2.46703	NXPE5	0	19.2629	EMP2	0	4.93895			ITGAM
	NPL	2.03571e-70	3.02197	PLEK	0	19.2091	SORCS1	0	4.93423			NPL
	RNF130	1.36872e-69	1.83287	MYO1F	0	19.066	MVD	0	4.8723			RNF130
	RNF150	1.87768e-69	3.4617	DOK2	0	19.0625	GATM	0	4.86969			RNF150
	DOK3	2.70586e-68	2.43992	PIRB	0	19.0547	SHISA2	0	4.86839			DOK3
	RASSF4	3.00326e-68	2.26517	MYO1G	0	19.0181	MTSS1L	0	4.85502			RASSF4
	IL4RA	5.19996e-68	2.46624	SIGLECH	0	18.9757	FASN	0	4.85413			IL4RA
	AOAH	6.1031e-68	3.00952	ITGB2	0	18.8211	EGFL8	0	4.85257			AOAH
	MAN1A	2.99967e-67	2.79638	PTPRO	0	18.8079	GAL3ST1	0	4.82143			MAN1A
	FAM46A	3.51858e-66	2.1052	GP49A	0	18.715	MFAP3L	0	4.81367			FAM46A
	GAS6	1.21419e-65	1.61672	NCKAP1L	0	18.7039	GPSM2	0	4.81362			GAS6
	PIK3CG	3.10574e-65	3.73284	ARHGAP9	0	18.6033	ID4	0	4.78407			PIK3CG
	CTSA	9.8625e-65	1.68111	NRROS	0	18.3423	FADS1	0	4.75391			CTSA
	BST2	1.03353e-64	1.60201	WAS	0	18.1926	POLR3H	0	4.75126			BST2
	ABHD12	2.10323e-64	1.84067	SASH3	0	18.0629	FAM171B	0	4.70643			ABHD12
	PLP1	1.09799e-63	1.50943	GM26740	0	18.0375	NAV2	0	4.67796			NINJ1
	NINJ1	1.32143e-63	1.79187	ITGAM	0	17.9289	ENTPD2	0	4.67656			IRF5
	IRF5	3.11094e-63	1.99292	CLEC2I	0	17.8063	ASRGL1	0	4.65571			FCGR4
	FCGR4	6.09718e-63	2.35586	PTAFR	0	17.8022	CDH1	0	4.63023			SERINC3
	SERINC3	6.94375e-63	1.52005	NFAM1	0	17.6693	GPT2	0	4.60142			CSF2RA
	CSF2RA	7.77273e-63	1.72104	NFKBID	0	17.4176	TMEM121	0	4.51665			LAT2
	LAT2	7.80637e-63	2.14235	RBM47	0	17.1194	ANGPT2	0	4.51293			HEXA
	HEXA	1.18734e-62	1.86579	EBI3	0	17.0265	ACOT1	0	4.50686			CD33
	CD33	1.18758e-62	2.72263	RHOH	0	16.9146	HMGCR	0	4.49919			SH3BGRL3
	SH3BGRL3	2.58271e-62	1.62881	STAB1	0	16.7124	ITPR3	0	4.45171			SIGLECH
	SIGLECH	3.3079e-62	3.51264	TLR7	0	16.6839	ZFP191	0	4.4257			WWP1
	WWP1	1.30613e-61	1.98827	RGS10	0	16.3811	PLEKHB1	0	4.42037			CMTM7
	APOE	2.27031e-61	1.53476	ARL4C	0	16.3764	PDLIM4	0	4.41788			AI662270
	CMTM7	2.69262e-61	1.55481	5430427O19RIK	0	16.3159	TBC1D10A	0	4.3867			CD300LD
	AI662270	7.71341e-61	2.0562	RAC2	0	16.315	PSAT1	0	4.35976			AP1B1
	CD300LD	8.75575e-60	2.52307	STAP1	0	16.2867	PXMP2	0	4.33544			PIRB
	AP1B1	9.24473e-60	2.524	DOK3	0	16.0336	ELOVL6	0	4.32896			HMOX2
	PIRB	1.19258e-58	2.21859	DAB2	0	15.9878	AATK	0	4.2791			NCF1
	HMOX2	1.66932e-58	1.71616	FMNL1	0	15.9484	FAM102A	0	4.19684			IFNGR1
	NCF1	3.71831e-58	2.18573	HAVCR2	0	15.9241	CRLF1	0	4.19079			SFT2D1
	IFNGR1	3.15327e-57	1.54121	SLFN2	0	15.8644	SC5D	0	4.18322			RAPSN
	SFT2D1	3.59072e-57	1.6378	RGS18	0	15.8047	TMEM47	0	4.17249			MAFB
	RAPSN	4.50598e-57	2.85038	BTK	0	15.7503	SCHIP1	0	4.16313			PLEKHO1
	MAFB	8.57064e-57	1.77545	CCRL2	0	15.6836	HSPA12A	0	4.16101			SNX8
	PLEKHO1	9.09768e-57	1.78909	PHF11A	0	15.6529	RDH5	0	4.15367			DCXR
	SNX8	1.33921e-56	2.2396	LAIR1	0	15.5006	INSIG1	0	4.14724			PTPRO
	DCXR	1.73269e-56	1.88874	MAFB	0	15.485	PDZD2	0	4.11507			SNX2
	PTPRO	4.18605e-56	2.92039	TM6SF1	0	15.4117	COL16A1	0	4.08453			SCAMP2
	SNX2	5.93296e-56	1.69405	LCP2	0	15.3594	PRDX6	0	4.06641			ARL11
	SCAMP2	1.11866e-55	1.67017	LRCH4	0	15.3284	DMD	0	4.06407			TNFRSF13B
	ARL11	3.08998e-55	2.61947	NCF4	0	15.1151	ABCA8A	0	4.02358			MYO5A
	TNFRSF13B	5.35322e-55	2.6695	NCF1	0	14.973	SYNGR1	0	4.02187			MSR1
	MYO5A	5.62551e-55	2.54285	LY9	0	14.9287	GAS7	0	3.99685			IL21R
	MSR1	8.02216e-55	2.57102	GM26522	0	14.9195	ACYP2	0	3.96547			TGFB1
	IL21R	1.17457e-54	2.49567	ITGB7	0	14.7712	PLSCR4	0	3.9586			ADAP2
	TGFB1	1.55643e-54	1.61951	NLRP3	0	14.6999	SNX16	0	3.95687			LPXN
	ADAP2	2.27825e-54	1.78856	SLAMF7	0	14.584	SCG5	0	3.94611			BIN1
	LPXN	2.5591e-54	2.65609	SYK	0	14.5342	CD59A	0	3.92932			STARD8
	BIN1	5.41296e-54	1.67778	2610203C22RIK	0	14.3672	VWA1	0	3.90452			ARL4C
	ITGB8	7.31633e-54	1.59633	UNC93B1	0	14.3189	LDHB	0	3.90395			SLCO2B1
	STARD8	8.74369e-54	2.16977	HPGD	0	14.2964	ARHGAP39	0	3.88435			ABCA1
	ARL4C	2.00782e-53	2.14474	ARHGAP25	0	14.2278	SLC27A1	0	3.87735			CLEC4B1
	SLCO2B1	2.26537e-53	1.99431	CD36	0	14.2163	FNTA	0	3.87661			TNFAIP8
	ABCA1	2.37869e-53	1.95832	LRMP	0	14.2025	TSC22D4	0	3.85329			TMCC1
	CLEC4B1	8.26342e-53	2.18937	IL2RG	0	13.9911	RND2	0	3.84278			B4GALT6
	TNFAIP8	8.61009e-53	1.60375	THEMIS2	0	13.9777	ADAMTS5	0	3.84096			CD200R1
	TMCC1	2.09486e-52	2.09172	PARVG	0	13.9165	ATP1A2	0	3.83177			2610203C22RIK
	B4GALT6	2.11341e-52	2.01803	1810011H11RIK	0	13.9029	SEMA3B	0	3.82889			WAS
	CD200R1	2.23688e-52	3.45729	FYB	0	13.8493	PCYT2	0	3.82762			TMSB4X
	2610203C22RIK	4.50927e-52	3.39044	DENND1C	0	13.8425	HSDL2	0	3.82489			TMEM86A
	WAS	6.58547e-52	2.33282	CD200R1	0	13.8371	MVK	0	3.76636			MARCKSL1
	TMSB4X	9.18761e-52	1.51281	KMO	0	13.7919	BPGM	0	3.76251			COTL1
	TMEM86A	1.41072e-51	1.85198	IKZF1	0	13.7757	HS3ST1	0	3.75987			TIFA
	MARCKSL1	3.24506e-51	1.72777	PIM1	0	13.7439	HEY1	0	3.75229			IL10RA
	COTL1	3.81492e-51	1.54446	RP24-272D15.1	0	13.4726	DST	0	3.7447			SLC11A1
	TIFA	6.15205e-51	1.90342	BATF	0	13.3399	SERPINA3N	0	3.70869			PTPRJ
	IL10RA	6.29686e-51	2.41944	FCGR2B	0	13.305	CNP	0	3.70516			EBI3
	SLC11A1	1.16694e-50	1.93549	BANK1	0	13.0612	SFRP1	0	3.70272			ARHGAP19
	PTPRJ	1.21892e-50	2.34563	DUSP2	0	13.0178	PMM1	0	3.70019			HCK
	EBI3	5.38104e-50	2.63587	PILRA	0	12.9547	CNN3	0	3.69673			P2RX4
	SYT11	7.54888e-50	1.59183	WDFY4	0	12.9425	FAM134B	0	3.67216			OAS1A
	ARHGAP19	1.72064e-49	2.66749	PTGS1	0	12.881	VIM	0	3.66315			APOBEC1
	P2RY12	3.78928e-49	1.80022	INPP5D	0	12.8732	EZR	0	3.62669			ADRB2
	MARCKS	4.44038e-49	1.72385	PTK2B	0	12.7287	CKB	0	3.62256			DNASE2A
	PMEPA1	9.09907e-49	1.74755	TLR13	0	12.7202	TAX1BP3	0	3.6178			SKAP2
	HCK	9.16706e-49	2.00348	OAS1A	0	12.6805	PPP1R9A	0	3.58889			NCF2
	P2RX4	1.14426e-48	1.69969	PTPN7	0	12.6776	ECHDC1	0	3.5781			MYO1F
	OAS1A	2.19072e-48	2.18299	STK17B	0	12.6171	GAMT	0	3.57664			IL16
	APOBEC1	2.976e-48	2.01513	GM21975	0	12.5761	SREBF1	0	3.55483			RGS18
	PISD	3.28706e-48	1.81689	SLC16A6	0	12.5679	HIST1H2BC	0	3.55365			CREG1
	ADRB2	4.77015e-48	1.9907	DAPP1	0	12.5603	PLCE1	0	3.51079			ASAH1
	DNASE2A	5.58152e-48	1.86584	TICAM2	0	12.462	RHOBTB3	0	3.48537			RNASEL
	SKAP2	7.71118e-48	1.82372	PSTPIP1	0	12.3575	MEST	0	3.48156			TLR1
	NCF2	8.98816e-48	1.60137	GPR160	0	12.2057	SLC44A1	0	3.4552			CTSZ
	MYO1F	9.21148e-48	2.24984	IFI204	0	12.1833	NTRK2	0	3.43952			STK17B
	IL16	1.36639e-47	2.26786	HCST	0	12.1754	CTNNAL1	0	3.43596			DOK2
	RGS18	1.65337e-47	2.64215	BATF3	0	12.1424	AFAP1L2	0	3.42181			BMP2K
	CREG1	2.249e-47	1.70143	PLXNA4OS1	0	12.1125	CDC42EP2	0	3.4184			KCNG2
	ASAH1	2.64219e-47	1.58375	CTSC	0	12.0878	PLEKHA4	0	3.39068			DCLRE1C
	RNASEL	4.79535e-47	3.02807	TLR1	0	12.0254	RTKN	0	3.38172			RNPEP
	TLR1	7.14736e-47	3.16781	TNFRSF11A	0	11.9751	PMEPA1	0	3.36619			TIFAB
	CTSZ	8.43745e-47	1.61347	PKIB	0	11.9536	APOE	0	3.32159			IL6RA
	STK17B	8.88367e-47	2.05798	SMPDL3B	0	11.8694	SLC12A2	0	3.30024			SLC15A3
	DOK2	1.03548e-46	2.66509	PIK3CG	0	11.8294	CDKN2C	0	3.29348			SLC15A2
	BMP2K	1.32081e-46	2.21993	OAS1G	0	11.8117	MATN2	0	3.28059			PTGS1
	KCNG2	1.39799e-46	3.7528	MATK	0	11.809	SLC6A8	0	3.2781			SNX20
	DCLRE1C	1.58914e-46	2.63758	RASSF5	0	11.7697	NDRG2	0	3.26023			TRIM30A
	RNPEP	1.7188e-46	1.69555	GUCA1A	0	11.7287	HOXB3OS	0	3.24496			ATP13A2
	TIFAB	3.06794e-46	2.35125	RASAL3	0	11.7195	GSTA4	0	3.2439			RHOH
	IL6RA	9.86938e-46	2.36491	CAMK1D	0	11.7138	DAAM2	0	3.21571			GUSB
	SLC15A3	1.18373e-45	2.22325	CD300LB	0	11.6621	GABBR1	0	3.20752			FES
	SLC15A2	1.67452e-45	2.46111	LGMN	0	11.4631	PCBP4	0	3.20384			SELPLG
	PTGS1	2.02973e-45	2.43735	SLC9A9	0	11.448	ATP1B2	0	3.17346			MPP1
	SNX20	2.29704e-45	2.0155	AB124611	0	11.4278	2310022B05RIK	0	3.16387			SLFN8
	TRIM30A	2.35543e-45	2.29562	ARHGAP22	0	11.3864	FAM212A	0	3.13069			EPS15
	ATP13A2	4.01964e-45	2.02837	SLC37A2	0	11.3511	MXI1	0	3.11421			THEMIS2
	RHOH	5.21704e-45	2.99873	SLC16A10	0	11.3208	CASP12	0	3.09775			TNFRSF11A
	GUSB	1.03451e-44	1.56714	CSF3R	0	11.2998	STARD3	0	3.09288			SLAMF9
	FES	1.17192e-44	1.94926	TNFRSF1B	0	11.2948	ATP6V0E2	0	3.08476			TNFRSF17
	SELPLG	2.05047e-44	1.63425	LYN	0	11.2675	MAPRE2	0	3.07437			KCTD12
	MPP1	2.59978e-44	1.74832	CCL2	0	11.2257	PMVK	0	3.06402			UCP2
	SLFN8	2.62877e-44	3.07602	CTLA2B	0	11.1885	S100A1	0	3.05945			APOBEC3
	EPS15	3.21325e-44	1.94316	ALOX5	0	11.1249	PLA2G16	0	3.05105			CTSB
	THEMIS2	3.3309e-44	3.2037	EMILIN2	0	11.1143	CROT	0	3.04736			MAN1C1
	TNFRSF11A	3.93847e-44	2.58648	CD40	0	11.0878	NR2F1	0	3.03076			CLTA
	SLAMF9	3.997e-44	1.9507	HVCN1	0	11.0591	WIPI1	0	3.00917			RHOG
	TNFRSF17	5.38776e-44	3.7215	HMOX1	0	11.0033	DHRS1	0	2.98215			IFI204
	TANC2	6.66163e-44	2.15242	HK3	0	10.9389	2810055G20RIK	0	2.97333			SEPP1
	CELA1	1.23206e-43	2.03752	G530011O06RIK	0	10.9125	S100B	0	2.94843			TLR13
	KCTD12	1.42787e-43	1.56626	TRAF3IP3	0	10.6988	S100A4	0	2.94382			PAOX
	SCD2	4.89011e-43	1.50162	DOCK8	0	10.5925	AMD1	0	2.92673			P2RY13
	UCP2	5.0815e-43	1.57189	TMEM106A	0	10.5598	0610007P14RIK	0	2.92263			LYN
	APOBEC3	6.51033e-43	1.82404	CTSH	0	10.4463	TM7SF3	0	2.89803			PICALM
	CTSB	7.74404e-43	1.80373	TNFAIP3	0	10.3638	MOCS2	0	2.89427			NPC2
	MAN1C1	1.25645e-42	2.28988	DOCK2	0	10.279	CAMK2D	0	2.86161			ATP2B1
	CLTA	1.34614e-42	1.68492	ANG	0	10.2361	CHPT1	0	2.86091			PREX1
	RHOG	1.99337e-42	1.57695	A630001G21RIK	0	10.1756	KIF1B	0	2.85564			GM4951
	IFI204	2.81217e-42	1.97082	IGHM	0	9.95584	HMGN3	0	2.85367			RBPJ
	SEPP1	3.67433e-42	1.84526	CCDC109B	0	9.95327	CTNNA1	0	2.84626			ATP6V0B
	TLR13	4.52205e-42	2.93653	IL4RA	0	9.89117	ARPC1B	0	2.83065			TLR2
	PAOX	4.79788e-42	2.13451	RASGEF1B	0	9.86416	LAMB1	0	2.81719			SULT1A1
	P2RY13	4.97384e-42	2.72432	RASGRP4	0	9.80843	TAF13	0	2.81417			BLVRA
	LYN	5.86758e-42	1.70724	SLC11A1	0	9.65115	TECR	0	2.78973			MFSD1
	PICALM	6.99897e-42	1.58908	CRLF2	0	9.61565	SMOX	0	2.77681			ACP2
	NPC2	9.54881e-42	1.64848	MAN2B1	0	9.45164	JOSD2	0	2.76158			GNPDA1
	ATP2B1	1.21512e-41	1.55622	PYCARD	0	9.39592	FEZ1	0	2.75463			CLEC5A
	ALDOC	1.335e-41	1.70769	MNDA	0	9.38599	SMCO3	0	2.74073			FRMD4B
	PREX1	1.81885e-41	1.84503	RGS2	0	9.33888	HIST1H1C	0	2.73318			5430435G22RIK
	QK	3.18265e-41	1.50638	TMEM37	0	9.28504	DHRS4	0	2.72645			ABCC3
	GM4951	1.01381e-40	2.04978	LSP1	0	9.23049	GLO1	0	2.7203			TMEM261
	KCNJ10	1.33942e-40	1.65291	CMKLR1	0	9.19751	MID1IP1	0	2.69121			NCF4
	RBPJ	2.30842e-40	1.72598	ABCC3	0	9.07764	PEBP1	0	2.65156			SLC43A2
	ATP6V0B	2.65618e-40	1.54973	FES	0	9.07483	HSD17B11	0	2.63044			HCST
	TLR2	3.8142e-40	1.85497	ARHGDIB	0	9.06587	KIF1A	0	2.62101			PTAFR
	SULT1A1	4.08739e-40	1.57521	TEP1	0	8.92563	ELOVL5	0	2.60459			SPIC
	BLVRA	5.28783e-40	1.58243	PILRB2	0	8.79443	SDC4	0	2.5687			DAGLB
	MFSD1	1.48006e-39	1.74003	KLHL6	0	8.74186	MIF	0	2.56605			H2-M3
	ACP2	1.58893e-39	1.83275	PTGER4	0	8.71895	PIK3R1	0	2.54449			LRMP
	GNPDA1	2.80155e-39	1.77848	HEXB	0	8.7042	SNCG	0	2.53841			CYSLTR1
	CLEC5A	5.64351e-39	2.26764	IFI30	0	8.39654	DARS	0	2.52848			SLC40A1
	FRMD4B	6.76999e-39	2.01832	NTPCR	0	8.3642	GRB14	0	2.50129			RAB8B
	5430435G22RIK	2.43885e-38	1.72488	B4GALNT1	0	8.3576	HOXA7	0	2.49228			TMCC3
	ABCC3	5.2788e-38	2.74656	PLCG2	0	8.32894	RNF5	0	2.45324			GPR160
	TMEM261	6.42489e-38	1.61163	GMIP	0	8.25108	S100A16	0	2.44918			SCIMP
	NCF4	1.00225e-37	1.59823	5430435G22RIK	0	8.20823	ACAA2	0	2.44267			EPOR
	SLC43A2	1.03763e-37	1.88279	CXCL16	0	8.17714	ABHD14A	0	2.43761			FAM111A
	HCST	1.17401e-37	2.05196	CCL7	0	8.16793	ADD3	0	2.43501			GNGT2
	PTAFR	1.48761e-37	2.54678	SAMSN1	0	8.10717	CTNNBIP1	0	2.43014			PRUNE2
	SPIC	1.69436e-37	3.48421	ABI3	0	8.10612	QK	0	2.42312			CCDC109B
	DAGLB	2.08959e-37	1.75036	TSPAN32	0	8.08628	TMEM205	0	2.40159			DLEU2
	H2-M3	2.16221e-37	1.68319	SP110	0	7.99521	HSD17B12	0	2.39876			PHF11B
	LRMP	2.34025e-37	2.53639	BST1	0	7.98808	PREX2	0	2.38912			PLXNB2
	CYSLTR1	2.49984e-37	2.12426	PRKCB	0	7.9666	MAP1B	0	2.31597			CD93
	SLC40A1	3.1225e-37	3.34596	SERPINB8	0	7.89616	ANGPTL4	0	2.28733			RASSF2
	RAB8B	3.72646e-37	1.71646	NUAK2	0	7.839	LHFP	0	2.26992			LCP2
	TMCC3	3.79345e-37	1.98349	NCF2	0	7.75173	CELF2	0	2.2617			5031439G07RIK
	TAB2	4.80386e-37	1.58571	BASP1	0	7.72689	CAR2	0	2.25804			IKZF1
	GPR160	5.01567e-37	2.50095	SMAGP	0	7.64476	ECI2	0	2.24396			ITGB2
	DST	5.59775e-37	1.52473	PLA2G15	0	7.55891	UQCC2	0	2.2255			ALOX5
	SCIMP	6.28778e-37	2.02918	GNGT2	0	7.4862	NDRG1	0	2.22456			CNDP2
	FOXD3	6.38541e-37	1.56573	LIMD2	0	7.43903	TUBA1A	0	2.21649			CD38
	EPOR	9.19212e-37	3.25616	SIRPA	0	7.41867	RARRES2	0	2.21094			FKBP15
	ITSN1	1.19943e-36	1.88277	PID1	0	7.41062	ZFAND6	0	2.20917			MAST3
	SCD1	1.69177e-36	1.54355	F630028O10RIK	0	7.39372	LSAMP	0	2.19577			CD4
	FAM111A	2.61895e-36	2.28095	LPCAT2	0	7.34615	NUDT9	0	2.17373			ARHGAP9
	SCG3	4.32696e-36	1.54115	TMEM173	0	7.28048	CRYAB	0	2.16361			FMNL1
	GNGT2	4.40292e-36	1.51574	FAM111A	0	7.25803	OAT	0	2.14615			OGFRL1
	TNS3	5.0238e-36	1.52003	PTPLAD2	0	7.19817	TSPAN3	0	2.14615			LACC1
	PRUNE2	8.98919e-36	1.57037	IL6RA	0	7.19168	MAL	0	2.14435			PLXNA4OS1
	CCDC109B	1.36374e-35	1.72889	ITGA4	0	7.11389	SOD3	0	2.11432			ARHGEF6
	DLEU2	1.59436e-35	1.52222	BID	0	7.03587	CD9	0	2.09838			FCGRT
	PHF11B	1.64078e-35	1.87527	ARHGAP15	0	6.97916	LAPTM4B	0	2.07899			NEURL3
	PLXNB2	1.98291e-35	1.8735	ST8SIA4	0	6.96704	ARPC1A	0	2.07488			CASP8
	CD93	2.02167e-35	1.65101	SAP30	0	6.8903	MPC1	0	2.06756			FBXW4
	RASSF2	2.21361e-35	1.73088	STXBP2	0	6.87997	RHOC	0	2.0535			RTP4
	LCP2	5.21807e-35	2.34561	CYBA	0	6.78135	ITIH5	0	2.0435			VAV1
	CTTNBP2NL	7.05971e-35	1.5675	CSF2RA	0	6.62327	SPCS1	0	2.02979			RPS6KA1
	5031439G07RIK	7.70321e-35	1.85098	ADRB2	0	6.60794	EPDR1	0	2.02799			ADAM33
	IKZF1	7.81223e-35	2.37047	ARRB2	0	6.60051	F3	0	2.00375			TNFRSF1B
	ITGB2	7.90532e-35	1.79021	CEBPA	0	6.58969	GSTM5	0	1.99946			GNA15
	ALOX5	8.60142e-35	2.85525	TRIM30A	0	6.43339	DAD1	0	1.99909			TRPV4
	CNDP2	1.08455e-34	1.56173	KCTD12	0	6.40926	JAM3	0	1.98983			LIPA
	CD38	2.93064e-34	1.73936	IL16	0	6.38604	NPDC1	0	1.98489			1810011H11RIK
	FAM19A5	3.46492e-34	1.52459	9930111J21RIK2	0	6.37996	CHCHD10	0	1.9688			NFAM1
	FKBP15	1.14871e-33	2.0296	FAM49B	0	6.36194	CCSER2	0	1.9522			RIN2
	MAST3	1.69411e-33	2.67035	TIFA	0	6.26755	SIRT2	0	1.94224			GNS
	CD4	1.78917e-33	3.55295	RFTN1	0	6.20737	FKBP1A	0	1.93561			C030034L19RIK
	ARHGAP9	2.37517e-33	1.96111	MYO5A	0	6.16777	SCP2	0	1.92533			AP2A2
	FMNL1	2.99045e-33	2.21094	APOBEC3	0	6.11732	RCN1	0	1.90898			9930111J21RIK2
	OGFRL1	3.26207e-33	1.64935	RINL	0	6.06796	MT-CO1	0	1.90269			DOCK10
	LACC1	4.90849e-33	1.8335	HHEX	0	6.06647	NDFIP2	0	1.88068			CTSD
	PLXNA4OS1	6.09985e-33	2.80433	APOBEC1	0	6.06049	MGST1	0	1.85231			PDE3B
	ARHGEF6	6.70779e-33	1.6236	TMEM119	0	6.0046	IFI27	0	1.83629			ADCY7
	HSD17B11	6.95782e-33	1.50711	BAZ1A	0	5.98396	MT-ND4	0	1.80953			TMEM8
	FCGRT	1.94122e-32	1.5139	RAB3IL1	0	5.96875	FERMT2	0	1.80518			CEBPA
	MERTK	2.12982e-32	1.89153	CMTM7	0	5.88558	PTOV1	0	1.7936			APBB1IP
	NEURL3	2.46526e-32	2.28101	TGFB1	0	5.78464	MT-CO3	0	1.78293			SLA
	CASP8	4.07548e-32	1.67152	EMB	0	5.68016	MT-ND1	0	1.77383			BANK1
	FBXW4	4.7667e-32	2.08843	SH3BGRL3	0	5.65367	SPTBN1	0	1.76786			DOCK2
	RTP4	5.59398e-32	1.52433	RAPSN	0	5.64702	MT-CO2	0	1.75502			CSF3R
	VAV1	6.35419e-32	2.0848	TNFAIP8	0	5.57867	SERPINE2	0	1.75307			PRKCB
	RPS6KA1	9.69821e-32	1.92423	MAP3K8	0	5.54384	ZFP706	0	1.74753			SEMA4A
	ADAM33	1.05413e-31	2.17142	BMP2K	0	5.51169	MT-ND2	0	1.73708			RAC3
	TNFRSF1B	1.29083e-31	2.24837	PFKFB4	0	5.46326	STMN1	0	1.71888			TMEM141
	COL27A1	1.30372e-31	1.56234	CSF2RB	0	5.45679	MT-CYTB	0	1.7161			IFI203
	GNA15	2.34388e-31	2.34543	IER5	0	5.44318	MALAT1	0	1.71146			DOCK8
	TRPV4	2.52242e-31	2.92471	SP140	0	5.43809	SPARC	0	1.70221			RBM47
	LIPA	3.1543e-31	1.6165	DNASE2A	0	5.40225	CPE	0	1.69458			BATF
	ABCA8B	4.22657e-31	1.52584	SKIL	0	5.39995	TIMP3	0	1.68066			TGFBR1
	1810011H11RIK	4.28909e-31	2.63936	ZEB2OS	0	5.39742	CD63	0	1.67684			SLC25A45
	NFAM1	5.01806e-31	2.20024	MAN1A	0	5.36818	ID3	0	1.66452			ARHGAP25
	RIN2	5.62376e-31	1.58897	PIP4K2A	0	5.36711	YWHAE	0	1.64573			RENBP
	GNS	6.09473e-31	1.54295	LPAR6	0	5.35287	S100A6	0	1.59852			SLC29A3
	C030034L19RIK	6.66133e-31	3.39243	RUNX1	0	5.33892	MT-ATP6	0	1.58684			NFXL1
	IQGAP2	8.91359e-31	1.77654	BIRC3	0	5.31026	BSG	0	1.58119			BTK
	AP2A2	1.36063e-30	1.60485	VRK2	0	5.29315	1810037I17RIK	1.0E-323	1.7127			PON3
	9930111J21RIK2	1.53075e-30	2.06174	CASP8	0	5.2861	LMO1	2.5E-323	2.28765			MOB3C
	DOCK10	1.59985e-30	1.66979	GRN	0	5.27568	GPR137B	2.0E-322	2.49289			PPP1R21
	CTSD	1.77802e-30	1.63259	GPSM3	0	5.26821	2810468N07RIK	8.58871E-318	3.58089			2020-03-01
	PDE3B	1.7912e-30	2.35109	LMNB1	0	5.26722	DDHD1	2.28437E-317	4.19922			VCAM1
	ADCY7	2.15374e-30	2.59334	RPS6KA1	0	5.22953	IAH1	3.467635E-317	2.28837			SUSD1
	P2RX7	2.18142e-30	1.69568	EHD4	0	5.21211	ATP8A1	1.380179714E-315	3.0972			CD22
	TMEM8	3.79261e-30	3.04013	FTL1	0	5.20798	DDAH2	3.010001727E-315	1.6989			CASP1
	FAM102A	4.28942e-30	1.51584	ARHGAP18	0	5.19518	PLSCR2	2.906001866E-314	2.42039			BIN2
	POU3F1	4.51871e-30	1.86697	PON3	0	5.14925	CRYM	3.350904976E-314	7.97285			PPBP
	CEBPA	7.16985e-30	1.61263	NFKBIZ	0	5.10976	MTCH1	1.0350975638E-313	1.6135			PPFIA4
	APBB1IP	7.62258e-30	1.84721	SLCO2B1	0	5.09604	HBEGF	4.72569259715E-313	2.3737			NFATC2
	SLA	1.05926e-29	2.07133	RASSF4	0	5.08326	ACAT2	6.368239379973E-311	3.47574			SRGAP2
	BANK1	2.67516e-29	2.59454	HFE	0	5.05581	LIMCH1	0	1.89358			SYK
	DOCK2	3.39893e-29	2.31279	TMEM86A	0	5.01361	APOC1	3.58067e-308	4.63078			CYP27A1
	CSF3R	3.7388e-29	2.59047	ADAP2	0	5.00443	ATP1B1	3.7418e-308	1.61214			TBC1D14
	PRKCB	3.89513e-29	2.16315	PLA2G7	0	4.96128	MAPK3	1.21762e-307	1.63591			DOK1
	SEMA4A	4.04457e-29	1.79114	DSE	0	4.92645	CCDC13	4.9033e-307	4.68163			ADRBK1
	RAC3	5.43319e-29	1.83958	TMSB4X	0	4.89762	SH3BP5	2.02529e-305	2.1753			GM26522
	TMEM141	5.77889e-29	1.78162	SKAP2	0	4.88552	SNTA1	2.99905e-304	2.43801			OAS2
	IFI203	6.64538e-29	1.54887	SNX5	0	4.83753	SLITRK2	1.19271e-303	9.85126			RGS19
	DOCK8	7.12723e-29	2.28356	SEMA4A	0	4.74504	HADHB	6.32887e-303	1.96218			MAN2A1
	ARID1A	9.91542e-29	1.50267	EFHD2	0	4.74398	TMEM66	7.47694e-302	1.65186			NME4
	RBM47	1.09979e-28	2.25227	ADAP2OS	0	4.73369	SLC31A2	3.50054e-300	2.55028			BC035044
	BATF	1.2527e-28	2.27342	SRGN	0	4.69694	SOX4	2.5947e-298	2.2659			RUNX1
	TGFBR1	1.71501e-28	1.68441	GM10116	0	4.6703	SELK	4.93494e-296	1.571			TMEM173
	WDR26	1.8223e-28	1.61266	RGS19	0	4.58313	PLIN3	5.4001e-296	2.05429			SMAP2
	SLC25A45	2.08911e-28	1.85321	LACC1	0	4.51867	PIPOX	4.5462e-295	6.39525			FLI1
	ARHGAP25	2.22623e-28	2.17988	TGFBR1	0	4.48797	PON2	1.16914e-294	1.98468			CAMK1D
	RENBP	2.45413e-28	1.70965	FUCA2	0	4.47927	MAGEH1	1.68326e-294	2.17538			PFKFB4
	SLC29A3	3.19436e-28	2.24758	LY96	0	4.46816	CSPG5	2.61894e-294	5.84169			LRCH4
	NFXL1	3.4403e-28	2.31874	IFI27L2A	0	4.46558	TRAPPC2	8.24776e-294	2.51489			BID
	BTK	3.94995e-28	2.66849	DAGLB	0	4.4032	PTPRT	1.172e-292	6.18054			ARRDC1
	PON3	4.01671e-28	2.20354	AP1B1	0	4.39113	PGP	1.8153e-292	2.1369			KDM7A
	MOB3C	4.22706e-28	1.85399	SSH2	0	4.34953	CPNE2	2.04427e-291	2.35293			GALC
	PPP1R21	4.29336e-28	1.89858	AW112010	0	4.28241	L1CAM	2.48656e-290	5.96921			STXBP2
	2020-03-01	5.79504e-28	2.18846	ATP13A2	0	4.23893	DDAH1	3.55973e-289	3.00347			PYDC4
	VCAM1	6.17089e-28	1.71913	ITGB5	0	4.23248	CDH11	1.07731e-288	2.74736			NHLRC3
	SUSD1	1.11283e-27	3.54933	SAMHD1	0	4.17474	SCRN1	5.60837e-288	3.55501			AI467606
	CD22	1.676e-27	3.50327	PLEKHO1	0	4.16203	EPHA5	7.16177e-288	8.99777			MS4A14
	CASP1	1.99304e-27	1.59801	RAB32	0	4.11017	CNTN1	1.12711e-287	6.50621			WDFY4
	POU3F2	2.1822e-27	1.50277	H2-M3	0	4.10983	MEGF9	1.30886e-287	3.23868			SH3BP2
	BIN2	2.60592e-27	1.59254	ADSSL1	0	3.98963	PAPSS1	1.40883e-287	2.0954			CSF2RB
	PPBP	2.63594e-27	3.23715	DOK1	0	3.97268	DDIT4	1.4854e-287	1.6066			APOC2
	PPFIA4	2.67587e-27	1.63902	HMGB2	0	3.9647	ACADL	2.8636e-287	2.24976			DENND1C
	NFATC2	3.65348e-27	2.08343	ADRBK1	0	3.91905	TKT	3.127e-287	1.70237			ENTPD1
	SRGAP2	3.96849e-27	1.60854	ACTR3	0	3.8891	FAM129A	3.50287e-287	3.04316			ZFP217
	SYK	4.01437e-27	2.48313	SH3BP1	0	3.87904	PTGFRN	7.73527e-287	4.56412			RREB1
	CYP27A1	8.16379e-27	1.73943	FXYD5	0	3.86813	ARL8A	8.98026e-287	2.10074			SAP30
	TBC1D14	9.09267e-27	1.9247	COTL1	0	3.82406	CDH2	6.40567e-286	3.53176			CCL3
	DOK1	1.04151e-26	1.58083	GSDMD	0	3.82166	FKBP2	6.81031e-286	1.77455			RP24-554B1.10
	ADRBK1	1.0579e-26	1.66403	CNDP2	0	3.8107	GJA1	2.00944e-285	2.28698			PDCD2L
	GM26522	1.33433e-26	2.0833	SERINC3	0	3.77675	MYO10	5.47719e-284	3.19179			CRYBA4
	OAS2	1.48838e-26	3.09393	RNASE4	0	3.75365	MLC1	1.32561e-283	2.744			TTYH3
	RGS19	1.55136e-26	1.54457	LIPA	0	3.68504	C4B	2.51025e-283	2.93952			KCNK13
	MAN2A1	1.60346e-26	2.20617	IFNGR1	0	3.67337	GRID2	8.12481e-282	9.23551			MAPKAPK2
	NME4	1.62212e-26	1.99696	CTSA	0	3.65731	NFIA	3.88981e-281	2.27435			AFTPH
	BC035044	2.2396e-26	2.26542	GUSB	0	3.64236	SDC3	2.35918e-280	2.66431			RNF169
	RUNX1	3.24505e-26	1.51071	D1ERTD622E	0	3.60145	PAQR8	8.14051e-280	5.14299			OPHN1
	TMEM173	4.89262e-26	1.8133	FAM46A	0	3.60087	SMPD2	1.07175e-279	2.75697			GCNT1
	SBF2	6.3332e-26	1.51596	DUSP1	0	3.59283	SVIP	2.76898e-278	3.11197			SIGLEC1
	ULK2	9.24337e-26	1.78156	SYNGR2	0	3.58681	HSD17B7	1.39726e-277	4.8934			GM26917
	SMAP2	1.04111e-25	1.58919	LY6E	0	3.56723	2810428I15RIK	3.18877e-277	1.84544			CHST7
	FLI1	1.06315e-25	1.59599	HEXA	0	3.5043	GLT8D1	4.39521e-277	2.30501			N4BP2L1
	CAMK1D	1.19037e-25	2.31389	IFI203	0	3.48693	RAB6A	6.78875e-276	1.76444			CD40
	PFKFB4	1.45024e-25	1.96739	RAMP1	0	3.47265	GSTK1	1.70471e-275	2.72038			GMIP
	LRCH4	2.1553e-25	1.92442	LMO2	0	3.46589	FAM213A	1.73513e-275	1.92352			SYNJ1
	AMDHD2	2.91467e-25	1.53683	LFNG	0	3.45288	MLF2	2.69367e-275	1.66672			ST8SIA4
	BID	3.79506e-25	2.33618	CEBPB	0	3.44667	MSI2	4.14353e-275	3.03347			SMPDL3B
	ARRDC1	5.14909e-25	1.82157	SDF2L1	0	3.42592	HIST2H2AA2	9.51601e-275	3.23313			PIK3R6
	WDFY3	6.41322e-25	1.8343	FLI1	0	3.41192	LHCGR	1.67441e-274	9.9588			LY9
	KDM7A	8.15242e-25	1.6641	IL10RB	0	3.37349	HIBADH	1.95881e-274	2.00935			PNPLA7
	GALC	9.91622e-25	1.93761	PRCP	0	3.34107	IDH1	5.31609e-274	2.33517			DYNLT1A
	STXBP2	1.33774e-24	1.80941	ARPC2	0	3.23575	SLITRK1	1.43934e-273	8.4717			CYP4F18
	PYDC4	1.96691e-24	2.01856	SP100	0	3.23085	METTL9	1.27887e-272	1.8578			TFEC
	NHLRC3	2.2052e-24	1.89034	ABRACL	0	3.22564	FAM101A	5.80493e-272	4.91323			RP24-272D15.1
	AI467606	3.17102e-24	1.97389	CREG1	0	3.20416	RNF215	1.21699e-270	2.49416			RNF213
	CNOT6	3.33792e-24	1.53261	CASP1	0	3.19543	SSBP2	4.91926e-269	1.91207			B3GNT8
	MS4A14	4.38661e-24	3.07923	MNDAL	0	3.18509	PRSS12	2.32715e-268	3.03054			PILRB2
	WDFY4	4.44364e-24	2.50304	IGF1	0	3.17339	PRDX2	5.65601e-268	1.57668			SP110
	RAB31	4.44982e-24	1.542	TPD52	0	3.16685	ADRA2C	1.8356e-267	6.0536			HVCN1
	CDK19	4.80581e-24	1.5085	BST2	0	3.1621	GM266	7.67127e-267	8.81952			LPIN2
	SH3BP2	4.85116e-24	2.19556	BIN1	0	3.14839	PTPRF	2.0801e-266	2.61456			ATP6V0A1
	CSF2RB	8.275e-24	1.76878	BLVRB	0	3.14649	ARHGEF10	5.92238e-266	3.80748			CCDC88B
	APOC2	8.87874e-24	1.65083	EVL	0	3.14191	EVI5	6.52856e-266	2.19102			SASH3
	DENND1C	1.38832e-23	2.41739	P2RX4	0	3.14027	TNS3	4.42669e-265	2.3973			KLHL6
	ENTPD1	1.46417e-23	1.52296	OGFRL1	0	3.13808	STARD13	2.05055e-264	3.82034			GLIPR1
	ZFP217	1.49807e-23	2.4389	EHBP1L1	0	3.12259	AIF1L	5.36087e-264	2.56299			ARHGAP22
	RREB1	2.674e-23	1.98876	NPC2	0	3.11107	CAT	1.7203e-263	2.17547			SGPL1
	SAP30	3.43554e-23	1.5448	RNPEP	0	3.06335	NOTCH1	8.68814e-262	2.56449			CLEC2I
	CCL3	4.9449e-23	1.50116	CTSZ	0	3.05509	OLFML2B	8.93596e-261	3.22967			SLC7A8
	RP24-554B1.10	5.10106e-23	2.74908	RHOG	0	3.01983	RNF13	1.47744e-260	1.81053			TRIM41
	PDCD2L	6.00113e-23	1.52471	MPP1	0	3.01831	ZEB2	6.66541e-260	1.69304			GM13251
	CRYBA4	7.00337e-23	2.56715	TWF2	0	2.98366	FHDC1	1.80291e-259	9.21334			1700017B05RIK
	TTYH3	1.02176e-22	1.89077	AP1S2	0	2.97093	FAM19A1	2.01874e-259	7.86276			AGPS
	KCNK13	1.08882e-22	1.77588	MEF2C	0	2.9219	SLC1A4	2.86736e-258	5.57697			SH3BP1
	MAPKAPK2	1.12123e-22	1.66328	PNP	0	2.91768	HSD17B10	6.06524e-257	1.78925			ARHGAP17
	AFTPH	1.50203e-22	1.66294	SNX2	0	2.91084	VWC2	1.08439e-256	4.04189			MTSS1
	RNF169	1.61276e-22	2.09084	PSMB9	0	2.84382	RASSF10	2.30573e-256	7.94719			MADD
	OPHN1	1.69702e-22	1.55996	MCL1	0	2.82832	PRIMA1	2.32531e-255	7.70881			RINL
	GRAMD1B	1.8648e-22	1.57235	ARPC4	0	2.81018	GFAP	6.26236e-255	3.9902			SLC16A6
	GCNT1	1.881e-22	2.5072	CLTA	0	2.80913	RAB9	7.4214e-255	2.08594			HPS3
	SIGLEC1	2.03284e-22	2.66084	PTPN1	0	2.79959	ABCD3	2.68995e-254	2.58516			PSTPIP1
	GM26917	2.24343e-22	2.36438	ERP29	0	2.79934	EEPD1	3.65171e-253	3.38256			GM4955
	GNA12	2.26795e-22	1.534	DHRS3	0	2.7945	GM13111	2.1776e-252	7.7032			NLRC4
	CHST7	2.40273e-22	2.37961	MFSD1	0	2.77261	GAS2L3	3.75327e-252	2.73546			MS4A4A
	GM27031	4.08707e-22	1.66974	CSK	0	2.74029	ADAMTS17	3.18469e-251	7.9773			ABCA9
	CIB2	4.1325e-22	1.67278	RNASET2A	0	2.70194	GM27031	1.84197e-250	6.80882			SH2B3
	N4BP2L1	4.38e-22	1.74571	SNAP23	0	2.69135	PFN2	3.11954e-250	1.91276			APH1C
	CD40	5.58039e-22	2.01181	BC028528	0	2.68688	LHFPL2	2.64782e-249	3.99499			ITPRIPL1
	KANSL1	5.84462e-22	1.50592	RPS29	0	2.67013	DHCR24	6.83548e-248	2.83487			HK3
	GMIP	6.89868e-22	2.25226	HPCAL1	0	2.66682	1110001J03RIK	1.2301e-247	1.9168			CLCN5
	SYNJ1	8.21192e-22	1.72727	PLIN2	0	2.66054	AACS	1.71542e-247	3.69434			SLC7A7
	ADAM9	8.74049e-22	1.56095	CTSB	0	2.65438	CYP39A1	1.44396e-246	3.73013			MKNK1
	LRRC4B	9.97527e-22	1.57704	PSAP	0	2.62186	TOX	2.57386e-246	6.11619			FNBP1
	ST8SIA4	1.06788e-21	1.68335	PSMB8	0	2.61484	ALPL	3.20055e-246	3.78521			DDX60
	BACH1	1.52235e-21	1.51752	H2AFZ	0	2.61275	DCLK2	1.27426e-243	6.40158			KCNK6
	SMPDL3B	1.56527e-21	2.25045	DRAM2	0	2.60837	MPC2	2.7204e-243	1.66693			ZFP710
	PAG1	1.62674e-21	1.59965	ABHD12	0	2.58967	CYP4F14	1.40415e-242	6.23167			SERPINB8
	SLC4A4	2.5881e-21	1.56787	ATF3	0	2.57458	FGFR1	2.32616e-241	1.777			PNPLA1
	PIK3R6	3.52913e-21	2.82606	GDI2	0	2.55624	A830082K12RIK	4.16763e-241	2.87615			RFTN1
	LY9	3.59988e-21	2.47499	HMOX2	0	2.53591	GRID1	5.6024e-241	9.73466			RHOBTB1
	2610507B11RIK	4.53941e-21	1.54661	CLIC1	0	2.52122	DUSP18	8.30183e-241	3.61196			MAP3K8
	PNPLA7	1.01261e-20	2.00085	ASAH1	0	2.50175	EMC7	2.59655e-240	1.65958			DNAJC13
	DYNLT1A	1.0195e-20	2.20903	FAU	0	2.49023	ENPP5	1.32241e-238	2.79443			RASSF5
	CYP4F18	1.11503e-20	1.67864	ANXA3	0	2.48961	KCNH8	1.5207e-238	8.90386			CTC1
	TFEC	1.19619e-20	2.6533	SDCBP	0	2.48262	9330159F19RIK	2.96018e-238	6.72467			TAGAP
	RP24-272D15.1	1.4018e-20	2.34159	UCP2	0	2.46893	MGLL	1.24702e-237	2.11072			LBX2
	RNF213	1.51621e-20	1.78314	PPP1R18	0	2.46221	EIF1B	2.40098e-237	1.71934			RASA4
	B3GNT8	1.53336e-20	1.90213	SERP1	0	2.45892	NDUFA4	1.07237e-236	1.53612			PIP4K2A
	PILRB2	2.58322e-20	2.29575	PFN1	0	2.4506	EI24	3.89937e-236	1.95983			ST6GALNAC4
	SP110	2.73443e-20	1.59881	ARPC3	0	2.43617	ANKS1B	9.35353e-236	8.25571			EEF2K
	HVCN1	4.09071e-20	2.2416	PRKCD	0	2.42492	EFS	1.08808e-234	4.18785			SLC16A10
	LPIN2	5.21795e-20	2.16135	RAP1B	0	2.38973	ITGA7	2.01052e-234	2.28965			MAP3K5
	ATP6V0A1	5.47215e-20	1.59222	RNF130	0	2.34844	ADK	2.75681e-233	2.26314			PIK3CD
	CCDC88B	5.70682e-20	2.7666	SFT2D1	0	2.34062	ABHD17B	1.51326e-232	2.44704			GPR165
	SASH3	5.93665e-20	1.97888	RPS28	0	2.33865	PPDPF	2.07113e-232	1.6837			OAS1G
	KLHL6	5.95875e-20	1.65543	HPRT	0	2.29672	COL5A3	3.84621e-231	2.98173			MCTP1
	GLIPR1	6.1807e-20	1.83322	TPM3	0	2.28721	ELOVL1	9.49007e-230	1.5754			ZSWIM6
	KDF1	6.50893e-20	1.57842	CAPZA2	0	2.22237	KLF13	1.10584e-227	1.80491			TSLP
	ARHGAP22	6.60814e-20	2.28355	PITPNA	0	2.19586	SNX1	2.48283e-227	2.24951			GM13212
	RNF145	7.83624e-20	1.57799	GLTP	0	2.18237	PLXNB3	9.25646e-227	4.45791			PIK3R5
	SGPL1	8.2142e-20	1.595	CORO1B	0	2.11573	RASA2	1.37923e-225	3.20136			TEP1
	CLEC2I	8.75189e-20	2.31554	RPL32	0	2.11292	HIGD1A	1.86612e-225	1.82232			RAB11FIP5
	SLC7A8	9.97184e-20	2.10808	RPS11	0	2.0962	CUEDC2	2.14231e-225	1.54886			DNMT1
	TRIM41	1.15879e-19	1.75002	RPS24	0	2.08826	4833439L19RIK	6.96957e-225	1.89093			OSBPL11
	GM13251	1.45261e-19	2.1905	TRF	0	2.0867	TRIM13	1.1248e-224	3.47177			SFT2D2
	FNIP1	2.08276e-19	1.57385	RPS9	0	2.08272	CORO2B	2.7443e-224	4.76462			WDR81
	LRRC4	2.62899e-19	1.59945	VAMP8	0	2.0642	NFE2L3	7.43952e-224	7.487			SLC46A3
	1700017B05RIK	2.72886e-19	1.98895	ACTB	0	2.05085	CYBRD1	9.7176e-224	6.49502			ARHGAP4
	AGPS	2.74482e-19	1.71859	SLC6A6	0	2.02802	ELOVL2	1.14393e-223	8.31144			GUCA1A
	GM11638	2.8011e-19	1.7931	RPL35A	0	2.02222	ZFP60	1.71253e-223	4.87469			BCL2A1A
	SH3BP1	2.82217e-19	1.62096	CAPZB	0	1.9708	LRRC4	1.53143e-222	6.93743			CMAH
	ARHGAP17	2.83648e-19	1.58276	H2-D1	0	1.96914	ARL3	3.80101e-222	1.6496			RB1
	MTSS1	3.0351e-19	1.62779	RPL37A	0	1.94319	HES5	1.43106e-221	12.8521			PAK1
	MADD	3.41181e-19	1.95742	OSTF1	0	1.88546	SCCPDH	2.72474e-221	2.13497			XLR
	RINL	4.35575e-19	2.02882	B2M	0	1.86004	TMEM63B	3.6106e-221	2.89113			DCK
	SLC16A6	4.53722e-19	2.27772	RPS4X	0	1.85655	ARL6IP1	4.0197e-221	1.56281			CMKLR1
	HPS3	4.95458e-19	1.7424	H2-K1	0	1.85246	TPI1	2.44653e-218	1.57907			CBL
	RAPH1	6.5236e-19	1.66949	RPL10	0	1.84439	TCEAL8	3.79329e-218	1.69498			TMEM170B
	PSTPIP1	8.31843e-19	1.69749	RPL18A	0	1.81772	CYP4F15	1.07668e-217	8.31117			MORC3
	GM4955	8.44507e-19	2.55845	RPS14	0	1.75237	AQP4	1.04014e-216	4.4184			KDM2B
	NLRC4	8.48312e-19	3.04709	PLTP	0	1.69863	PFKM	3.97939e-216	3.12059			ASGR2
	LRP2	9.00862e-19	2.9278	FTH1	0	1.5772	NRARP	5.93713e-216	1.64024			RAP2C
	MS4A4A	9.21405e-19	2.57399	GRB2	4.9E-324	2.23503	KIT	2.39164e-215	5.00449			GALNT12
	2210017G18RIK	1.07155e-18	2.14886	ARRDC1	1.0E-323	3.94573	FJX1	8.12826e-215	3.21586			MITF
	ABCA9	1.18088e-18	1.63561	AIM2	3.0E-323	8.37971	SNTB1	1.62571e-214	4.51806			GM26759
	SH2B3	1.2306e-18	1.80447	ACSL5	7.2E-322	2.93174	TYRO3	6.36546e-214	6.55447			BC049352
	APH1C	1.33906e-18	1.68849	GPR171	3.607E-321	21.2501	FAM212B	3.15808e-213	3.12734			GPR82
	ITPRIPL1	4.0621e-18	1.65818	KLRK1	4.68E-321	17.0705	AUTS2	4.3263e-213	2.27873			FLCN
	HK3	4.57178e-18	1.95436	BC147527	7.74E-321	12.7698	ZFP428	1.28692e-212	3.55438			LYVE1
	CLCN5	4.58514e-18	1.89834	CLTC	2.2683E-320	2.60067	PLXDC2	2.9051e-212	2.27926			SLC37A2
	PCDH10	5.3795e-18	1.51868	XLR	2.478E-320	7.95352	HMGB3	2.5565e-211	2.6211			RP23-218F13.7
	SLC7A7	5.8017e-18	1.70847	EDEM1	3.5894E-320	3.13799	BC031181	1.57533e-210	1.62049			TSPAN32
	DUSP7	5.90295e-18	2.19105	SH3GLB1	9.483E-320	1.94336	ABAT	2.78393e-210	3.51015			TLR4
	TGFBRAP1	7.13553e-18	1.84704	TMCC3	2.2279E-319	4.57112	POLR2F	9.39063e-210	1.68315			GP49A
	MKNK1	8.58133e-18	1.57275	RNF150	3.80184E-319	6.78043	SFXN1	1.49338e-209	2.13008			COA4
	FNBP1	9.81218e-18	1.6119	BLVRA	7.18287E-319	2.56303	SLC1A5	3.62476e-209	2.16714			RBBP8
	DDX60	9.88248e-18	1.77553	RPS5	1.27315E-318	1.73988	RAB38	2.6183e-208	5.40692			AKR1C13
	KCNK6	1.36363e-17	2.61045	COMMD8	3.313135E-318	2.30741	9430041J12RIK	2.63256e-208	9.43315			ABHD15
	ZFP710	1.38903e-17	2.00892	HN1	1.653069E-317	1.95805	RAB34	1.44432e-207	1.56397			TRIM5
	SERPINB8	1.73864e-17	2.08583	PILRB1	4.4864374767E-314	9.57988	EPHB3	1.68137e-207	5.07159			ITGA4
	PNPLA1	1.84274e-17	2.57485	CLEC4D	2.232751740945E-312	10.4475	ACADM	3.1554e-206	1.81855			VAV3
	RFTN1	2.0853e-17	1.62682	POLD4	1.25224038288034E-310	2.39296	SMPDL3A	2.41825e-205	1.56475			MX1
	RHOBTB1	2.43555e-17	2.04553	RPS23	6.0207125550952E-310	1.72287	SMTNL2	2.55034e-205	6.86705			RNF19B
	MAP3K8	2.49184e-17	1.5425	RNASEL	0	7.04484	IL25	6.74767e-205	9.66073			ADAR
	DNAJC13	2.54709e-17	1.58272	NRM	0	3.71028	CLDN25	9.02383e-205	1.68433			ARHGAP18
	RASSF5	2.69715e-17	1.90984	RBPJ	4.88923e-308	3.47931	SERINC5	4.12169e-204	3.33719			N4BP1
	CTC1	2.85624e-17	1.83363	GM9843	1.05935e-307	2.48527	SEC14L2	1.12266e-203	6.19762			CD300LH
	TAGAP	2.91785e-17	1.68207	LYZ1	7.78587e-307	19.4329	TCEAL3	6.96732e-203	3.41682			MNDA
	LBX2	3.37133e-17	2.48808	PREX1	3.46957e-306	3.58432	CSAD	6.86861e-202	2.20151			4933406I18RIK
	RASA4	4.15238e-17	2.13457	RPS27A	3.08974e-303	1.81124	TENM3	3.55968e-201	4.45516			MLXIP
	PIP4K2A	4.23182e-17	1.70475	ORAI1	2.25868e-302	2.35901	FMNL2	3.59551e-200	3.15183			ADRB1
	ST6GALNAC4	4.30009e-17	1.52169	FRRS1	5.49907e-302	7.70108	SH3PXD2B	6.45211e-200	2.91214			MID1
	ENPP1	4.50664e-17	1.54983	RPS18	5.64992e-302	1.80355	ARL2	6.86069e-200	1.83508			GM8369
	EEF2K	5.38535e-17	1.56337	DYNLT1A	2.7895e-301	6.0732	GCA	1.09756e-199	3.52269			AKNA
	SLC16A10	6.32233e-17	2.11718	SEMA4D	5.03414e-301	5.79109	ISPD	6.65238e-199	4.04763			GM26912
	MAP3K5	7.22124e-17	1.98689	GM13251	1.46719e-296	7.47931	LGI1	1.45526e-198	6.76906			DISC1
	PIK3CD	1.20503e-16	1.71581	ZBP1	1.49884e-294	3.85192	SPON1	3.11203e-197	3.38014			EIF2AK2
	GPR165	1.35914e-16	2.8202	IFNAR1	3.83657e-294	2.68629	SLITRK5	3.71776e-197	6.95598			ENGASE
	OAS1G	1.83375e-16	2.10275	CYP27A1	1.22582e-292	4.19232	PPARGC1A	1.09237e-196	3.66464			AP1G2
	MCTP1	2.77066e-16	2.23905	RENBP	1.46027e-291	3.09581	GRIK3	1.4522e-196	6.22876			ADAM19
	ZSWIM6	2.79174e-16	1.67203	PHF11D	2.69117e-291	3.3598	ZFYVE21	1.87956e-196	1.78027			FCNA
	TSLP	3.2516e-16	2.00852	BC017643	7.41817e-291	3.00437	UQCR11	1.04001e-194	1.63958			SLC12A6
	GM13212	3.4511e-16	2.47019	RPS19	1.30016e-290	1.68675	MAPK8IP1	1.7286e-194	1.87911			PIGZ
	PIK3R5	3.76544e-16	2.39006	PRUNE2	1.04781e-288	2.34973	GGCT	1.52765e-193	2.83393			MANBA
	TEP1	3.77477e-16	1.51582	TMEM261	5.86651e-288	2.45432	CDH15	3.81622e-193	9.74959			AGO4
	RAB11FIP5	3.83016e-16	1.66583	RPS6	8.03746e-288	1.67651	LSS	4.40712e-193	4.56025			MATK
	DNMT1	3.9886e-16	1.71435	NECAP2	6.33358e-286	2.01644	A230065H16RIK	7.63174e-192	6.61795			MAPKAPK3
	OSBPL11	3.9923e-16	1.68697	IFNGR2	6.94047e-286	1.65055	GM12688	2.29294e-191	7.89195			ETV6
	PTPRT	4.09664e-16	1.58045	AI467606	1.09838e-285	4.56753	TFAP2A	1.66836e-190	6.82235			RASAL3
	SFT2D2	4.12895e-16	1.55996	RPS15A	1.74711e-285	1.81105	HIST2H3C2	5.83062e-190	5.09214			SYCE2
	WDR81	4.94825e-16	2.12928	GRAP	2.75175e-284	2.80748	STX7	5.55187e-189	1.68936			ETV3
	SLC46A3	5.19846e-16	2.16242	ADCY7	2.81847e-284	5.64203	SEMA4B	7.98394e-189	3.53482			B4GALNT1
	ARHGAP4	7.44264e-16	2.2977	MAP4K1	5.19769e-283	9.14317	PNMAL2	2.96236e-188	3.77655			TGM1
	GUCA1A	7.75723e-16	1.89612	RPL17	1.43756e-282	1.78973	THRA	1.05382e-187	1.6183			TRIM30D
	BCL2A1A	7.91797e-16	1.86288	PDCD2L	1.83473e-282	3.05431	SEC62	1.4211e-187	1.53662			SLC16A7
	CMAH	8.64821e-16	2.52829	PIK3CD	7.99212e-282	4.76349	CARKD	1.22737e-186	1.83402			GM6277
	4930599N23RIK	1.00382e-15	1.71126	CD93	5.6893e-281	2.67699	MT-ND5	2.38995e-186	1.61942			TNS4
	RB1	1.0582e-15	1.59426	PIK3R5	1.5277e-279	9.89937	HIGD2A	9.74378e-186	1.55848			SP140
	PAK1	1.06387e-15	1.51289	CARD9	2.47751e-279	9.92177	GOLGA7	4.45957e-185	1.81032			TMEM221
	XLR	1.1212e-15	1.90254	GAS6	2.55151e-279	2.46478	TRPM3	5.77723e-185	5.01827			STAP1
	DCK	1.1538e-15	1.89738	GNPDA1	1.34221e-278	2.84424	SREBF2	8.18384e-185	2.83042			GM13710
	CMKLR1	1.77038e-15	1.76182	ATP2B1	4.4439e-278	2.24652	GNG7	1.05481e-184	4.94646			SEMA4D
	CBL	2.08881e-15	1.81622	PRR13	5.49548e-277	1.89181	PSMB2	1.10045e-184	1.59356			5430427O19RIK
	CRYBB1	2.40937e-15	1.77918	RPS7	2.59132e-276	1.83528	KCNJ16	1.24495e-184	7.38686			DPPA3
	TMEM170B	2.57964e-15	1.93925	TNNI2	6.25432e-276	8.03572	AAMDC	1.2988e-184	1.93155			BATF3
	MORC3	2.97248e-15	1.60098	TK1	1.2215e-274	10.2671	NID2	1.56244e-184	3.64254			A630001G21RIK
	MTMR10	3.05377e-15	1.59872	ACTR2	1.43172e-274	2.26658	PACSIN3	2.99175e-184	2.41087			CD300LB
	KDM2B	3.42853e-15	1.60095	SLC7A8	1.85632e-274	5.39734	2010111I01RIK	3.30872e-183	1.70474			CSF2RB2
	ASGR2	3.56917e-15	2.67128	VAV3	2.67688e-273	7.35969	TEKT5	6.22292e-183	7.68201			MYO7A
	RAP2C	3.65892e-15	1.66114	CDK1	1.68417e-272	8.27386	GPM6A	1.91199e-182	1.83617			BMP2
	GALNT12	3.99033e-15	2.31736	RGS14	4.10835e-271	9.3192	4931406C07RIK	4.43712e-182	2.54645			PYHIN1
	GM22957	5.01282e-15	1.91544	PKN1	1.20567e-270	2.80985	CYHR1	8.51388e-182	1.91376			ZMYND15
	ZNFX1	5.22061e-15	1.5001	LRRFIP1	3.54675e-268	2.81423	RASGEF1C	1.42189e-181	6.78166			CLN6
	MITF	6.01555e-15	1.93435	PYDC4	6.36797e-268	10.4283	RFTN2	4.09001e-181	3.04445			C5AR2
	GM26759	6.01658e-15	2.41863	APH1C	6.39146e-268	3.92211	FMO1	6.15328e-181	1.79372			TBC1D22A
	BC049352	6.26584e-15	2.75391	KLF6	3.79573e-267	2.62722	MYL6B	6.0528e-180	4.44212			SLC45A4
	GPR82	7.42837e-15	2.73741	SLC25A45	9.89531e-267	3.52457	SLC35E4	8.24841e-180	2.5893			RGS14
	FLCN	7.74081e-15	1.59771	MAPKAPK3	7.97203e-266	4.4483	CLCN3	3.33227e-179	2.49631			VAULTRC5
	D8ERTD82E	9.11816e-15	1.92879	ASF1B	2.63218e-265	7.43346	NUDT2	3.78941e-179	2.39543			ANAPC15
	ATXN7	1.69011e-14	1.61407	H2-OB	3.56085e-265	11.9036	BEX4	4.45586e-179	4.69159			PILRB1
	LYVE1	1.8171e-14	2.15241	VRK1	4.47244e-265	2.98324	MCEE	7.4268e-179	1.96093			DDI2
	SLC37A2	1.8808e-14	2.21636	CITED2	3.49897e-264	3.325	OAF	2.64723e-178	1.57549			NMRAL1
	RP23-218F13.7	1.92044e-14	2.55503	SLC29A3	3.87028e-264	3.86759	SLAIN1	3.75058e-178	5.55811			TMEM206
	TSPAN32	2.27252e-14	1.88311	MS4A8A	1.21445e-263	14.8571	GFRA2	7.11733e-178	2.11415			TRIM30C
	TLR4	2.70143e-14	1.90583	MCM5	1.87185e-262	5.93055	CAR5B	8.92937e-178	5.30078			BATF2
	GP49A	3.01735e-14	1.55972	TNIP3	5.05181e-262	15.1249	B9D1	1.1093e-177	2.16407			GPR84
	NPAS3	3.3822e-14	1.74657	ACP5	1.26562e-261	8.09938	TMX2	1.31773e-177	1.80866			SLC13A3
	COA4	4.54789e-14	1.63083	FRMD4B	3.01816e-261	3.40022	GRIK2	2.05922e-177	7.0566			6330416G13RIK
	RBBP8	4.62733e-14	1.84061	B3GNT8	2.86151e-260	3.5844	1190002N15RIK	2.74699e-177	3.34054			8030453O22RIK
	AKR1C13	4.70285e-14	1.63129	TLR4	9.74982e-260	6.90642	FIBP	3.91676e-177	2.23159			ARID3A
	ABHD15	4.75221e-14	2.34164	SHISA5	1.44692e-259	1.91864	PDE10A	1.95763e-176	4.6414			GAB3
	TRIM5	5.06887e-14	1.86108	GPR84	4.53415e-259	14.3106	ZFP397	7.15922e-176	2.89181			HIVEP3
	ITGA4	5.23181e-14	1.54834	GM4955	1.73431e-258	10.0004	FUCA1	1.62353e-174	1.61116			GDF9
	VAV3	5.34609e-14	1.89883	RPL39	4.79529e-258	1.86245	ITPK1	9.02553e-174	2.3993			NLRP3
	MX1	6.19832e-14	2.71395	RP2H	6.77973e-258	3.82231	TMEM9B	5.86065e-173	1.67841			ALG8
	RNF19B	6.64211e-14	1.7083	ARL5C	1.93676e-257	6.0428	FXYD7	4.92683e-172	2.14981			HEATR5A
	ADAR	7.44275e-14	1.65464	PAOX	3.38795e-257	3.57301	RAB3B	1.2097e-171	5.9611			CACNA1D
	CHP2	7.66152e-14	1.70871	LGALS3BP	4.56482e-257	2.37042	GSTA1	3.36062e-171	8.08433			PQLC2
	STARD9	7.76831e-14	1.61125	GPX1	5.76374e-257	1.99156	TMEM184C	3.92826e-171	2.40387			FOXRED2
	SETDB1	8.1722e-14	1.694	DGKZ	1.8968e-256	3.01825	C130071C03RIK	1.45933e-170	7.18378			HPN
	ARHGAP18	8.33326e-14	1.53365	VILL	3.70476e-256	5.85694	TEAD1	1.9047e-170	2.72744			UGCG
	N4BP1	8.50957e-14	1.52089	DLEU2	1.77129e-255	2.56156	PDGFC	7.29994e-170	3.1902			SLC14A1
	CD300LH	1.10351e-13	2.48427	SIPA1	3.67667e-255	2.21607	NCALD	1.85503e-169	2.80872			GM5431
	MNDA	1.19749e-13	1.56303	CCDC88B	5.89787e-255	8.05004	PPP2R3A	6.1558e-169	2.96307			MROH1
	4933406I18RIK	1.62777e-13	2.48206	TMEM243	1.2505e-254	2.45897	ITGAV	7.49364e-169	2.55955			SNX30
	MLXIP	1.6924e-13	2.07524	GALNT12	2.7557e-254	6.04996	HPDL	1.01452e-168	6.53903			MYO1G
	ADRB1	1.87953e-13	2.2043	LTB4R1	3.14091e-254	6.50811	BCAS1	3.48821e-168	1.60573			RASGRP4
	MID1	2.24302e-13	1.56304	NFKBIA	6.43715e-254	3.3753	HDHD2	8.57623e-168	1.99605			PLCL2
	GM8369	2.35419e-13	2.27563	TSPAN33	3.05937e-253	8.20024	PARD6G	1.1718e-167	2.19553			ABCB1B
	AKNA	2.57962e-13	2.17706	EPOR	1.3197e-252	10.5242	CEP85L	3.39498e-167	3.90175			SLC26A11
	GM26912	2.80018e-13	2.31415	ICOSL	5.52144e-252	5.21746	ENPP1	6.55741e-167	3.58185			TRPM2
	DISC1	3.11087e-13	1.90431	RPS13	1.2765e-251	1.81951	TMEM14A	6.56577e-167	2.34264			SKP2
	EIF2AK2	3.20018e-13	1.5424	GPR35	5.56583e-251	10.867	TNIK	7.49898e-166	3.75323			RUNX3
	SENP8	3.54092e-13	1.67528	RPS3	7.6155e-251	1.65916	CDH10	9.93315e-166	6.66935			CXCR3
	ENGASE	3.67845e-13	2.14504	FGR	1.54233e-250	9.68725	ZCCHC18	2.5914e-165	2.30273			LYZ1
	AP1G2	3.75138e-13	1.89037	ICAM1	2.05736e-249	3.61937	1500011K16RIK	5.52884e-165	1.79697			GM15964
	ADAM19	5.1245e-13	1.88078	DCXR	1.07536e-248	2.54585	ATAT1	3.85062e-164	2.43585			CDS1
	HS6ST1	6.32769e-13	1.98917	RPS16	3.70714e-248	1.66249	EHD3	6.35418e-163	2.28022			MTR
	FCNA	6.54191e-13	2.79889	DCK	1.41617e-247	5.17322	RHPN1	6.71935e-163	4.23928			B3GNT7
	POU5F2	7.67974e-13	2.07625	CRYBA4	2.65644e-247	7.52054	KANK1	8.39581e-163	2.88992			SLC38A7
	KDM4A	1.04283e-12	1.51764	PLK3	3.32665e-247	5.07361	SLC35B2	2.74406e-162	2.07862			GDF3
	SLC12A6	1.24625e-12	1.62412	CST3	5.32901e-247	1.64907	FBXL15	2.88774e-162	2.55244			SLC7A13
	PIGZ	1.34445e-12	2.25209	MFNG	6.385e-247	3.16254	0610011F06RIK	3.12183e-162	2.00833			B3GALT4
	MANBA	1.40406e-12	1.81137	RPL23	3.11185e-245	1.72519	PHPT1	3.36341e-162	1.91065			ELF4
	PPP1R3B	1.41972e-12	1.77043	TRPS1	9.15661e-245	3.28149	APC2	6.49491e-162	5.10059			ARID3B
	AGO4	1.56811e-12	1.96948	ZFP36	9.56214e-245	1.77999	HSPA2	8.34825e-162	1.99919			TRAF3IP3
	MATK	1.62888e-12	1.77254	GNB2L1	2.38118e-244	1.79203	B3GAT2	1.06119e-161	6.25174			SLC17A9
	MAPKAPK3	1.66382e-12	1.52346	KLRD1	3.55324e-244	26.0341	CLN3	3.7944e-161	2.2558			RP23-281H4.5
	ETV6	2.19711e-12	1.74521	NFXL1	1.03985e-243	4.69931	RP23-395C1.4	5.88677e-161	9.49234			MOGS
	RASAL3	2.36618e-12	2.29056	REL	7.29366e-243	5.35683	TMEM256	6.14943e-161	1.60188			PTPN7
	MTMR12	3.27322e-12	1.55599	RP24-554B1.10	2.28686e-242	10.4745	MORN2	3.72096e-160	2.61985			CARD9
	SYCE2	3.63578e-12	1.58562	AMICA1	4.57634e-242	11.4576	GPNMB	6.60857e-160	4.79358			GM21807
	1700061E18RIK	3.6425e-12	1.56868	TGIF1	2.04848e-241	2.90977	PPP2R2A	1.73444e-159	2.04596			TICAM2
	ATXN1L	4.74944e-12	1.50063	PAK1	7.5624e-241	3.08198	CAB39L	2.07647e-159	2.24435			PTK2B
	ETV3	4.88831e-12	1.5241	RPS12	5.64105e-240	1.77906	SGCB	8.23582e-159	1.99527			SASS6
	B4GALNT1	4.89444e-12	1.52775	CIITA	5.6139e-239	9.42254	PHLPP1	8.88776e-159	3.41453			PLAGL2
	TGM1	5.00905e-12	2.45976	PSME1	5.93043e-238	1.83223	MRPS33	1.20574e-158	1.5238			TIMD4
	CACNG4	5.05312e-12	1.54627	RPS3A1	8.07675e-238	1.64341	SH3PXD2A	1.76543e-158	2.40806			SMIM24
	TRIM30D	5.0926e-12	1.96799	FAM26F	1.39428e-237	7.53923	1110008P14RIK	1.91672e-158	1.95612			KIF21B
	MAML1	5.31239e-12	1.97766	MCM3	1.49016e-237	3.91744	CACNG4	4.16981e-158	5.61309			TMEM104
	SLC16A7	5.53484e-12	1.52758	NRP1	2.44378e-237	1.57517	CCDC104	1.12589e-157	2.01468			IDUA
	GM6277	5.70266e-12	2.1664	H2-T23	5.29787e-237	2.46706	ICT1	4.70761e-157	1.73545			GM13166
	TNS4	5.76837e-12	2.19503	RPL26	6.30814e-237	1.65435	SCN3B	7.47364e-156	4.76853			TOR4A
	SP140	6.54222e-12	1.55551	PLCL2	7.7768e-237	8.53056	AIG1	2.5244e-155	1.73625			FCHSD2
	TMEM221	8.28714e-12	1.88233	C5AR2	1.43086e-236	9.52805	AKTIP	8.09907e-155	1.87687			GALNT4
	STAP1	1.0525e-11	1.60554	EIF4EBP1	7.88885e-236	2.10868	PHYH	5.85063e-154	1.8317			4930589L23RIK
	GM13710	1.29404e-11	2.47737	CMTM6	1.87598e-235	2.2228	MT-ND3	1.87396e-153	1.6329			AI427809
	SEMA4D	1.58898e-11	1.63505	EPN1	2.97233e-235	1.95687	AGPAT5	5.2485e-153	2.256			TRIM65
	5430427O19RIK	1.67858e-11	1.76182	ELMO1	1.21332e-234	2.59359	EVA1C	7.06002e-152	2.95018			RP24-167M10.2
	DPPA3	1.70435e-11	2.55797	ITGAX	1.23871e-234	11.1446	UNC80	6.32415e-151	6.21708			KMO
	BATF3	1.7511e-11	1.60429	SMAP2	2.35621e-234	2.68807	SNCA	6.90524e-151	2.91441			BC147527
	ZMYM3	1.80337e-11	1.64077	2810417H13RIK	8.45736e-234	10.1577	VMN1R90	1.13563e-150	6.23644			F830016B08RIK
	A630001G21RIK	1.80447e-11	2.00354	ZFP36L2	5.56244e-233	2.17073	ITGB3	1.21032e-149	3.88538			GM11707
	CD300LB	1.80793e-11	1.91623	KLRB1B	4.01274e-232	14.5643	RIPK4	3.29877e-148	7.53886			SLC13A2
	CSF2RB2	1.9981e-11	2.04634	ARRDC4	6.92647e-232	3.68996	CERS4	3.61135e-148	1.86226			IL10
	E230001N04RIK	2.25449e-11	1.87821	A530040E14RIK	2.30725e-231	9.761	MTFP1	6.48349e-148	3.63396			TMEM150B
	MYO7A	2.35009e-11	1.86072	PLEKHO2	3.5625e-231	3.22697	LDLR	1.13701e-147	3.016			HECA
	BMP2	2.37745e-11	1.59307	RPL34	5.34696e-231	1.74504	NFIC	1.14841e-147	1.71899			TYK2
	PYHIN1	2.39261e-11	1.69655	CD209A	6.1349e-231	34.8416	FAM171A1	1.31034e-147	2.65805			GM26510
	ZMYND15	2.45929e-11	1.68647	TXNIP	7.22049e-231	1.95125	NACC2	1.56619e-146	1.96846			NAIP2
	CLN6	2.58435e-11	1.73238	RPL35	3.82653e-230	1.7983	GKAP1	6.31137e-146	2.15107			TNNI2
	C5AR2	3.17164e-11	1.98383	SYCE2	8.04258e-230	4.07038	AZIN1	7.75046e-146	2.23031			TBC1D4
	TBC1D22A	3.22667e-11	1.61848	GPR18	2.19819e-229	10.175	COX7C	1.0757e-145	1.53609			GM13248
	SLC45A4	3.6941e-11	1.85903	IL13RA1	3.88417e-228	3.49449	ARHGEF19	2.37819e-145	5.46412			CD1D1
	RGS14	4.58105e-11	1.83584	ZYX	4.40374e-228	2.31761	SRC	5.47595e-145	3.37099			MGAT4A
	VAULTRC5	4.84996e-11	2.10489	MAF	7.35053e-228	2.58549	DDRGK1	8.6391e-145	1.51764			PCTP
	ANAPC15	5.05649e-11	1.65477	SGK3	1.02817e-227	3.04842	AI464131	2.40997e-144	5.29377			MYL2
	PPP1R14D	5.23456e-11	1.55709	TMEM176B	1.30589e-227	2.61205	VPS37B	4.68789e-144	2.03603			TBC1D9
	PILRB1	5.27761e-11	1.87225	SLFN1	2.0479e-227	9.74876	PAIP2B	7.05915e-143	3.48067			NEURL1A
	OCRL	5.71387e-11	1.50868	MAN1C1	2.24996e-227	3.60714	CIPC	2.99868e-142	2.93422			RHOX8
	PLEKHG5	6.31617e-11	1.61718	GDA	8.43522e-227	6.45866	RAB10	3.71148e-142	1.76518			ACSL4
	DDI2	7.35883e-11	1.59673	PIK3R6	1.41291e-226	7.27236	SH3D19	3.77384e-142	2.87534			B4GALT5
	NMRAL1	8.2651e-11	1.63333	KCNK13	1.56409e-226	3.06398	TMEM33	4.26407e-142	1.72004			A530040E14RIK
	TMEM206	8.40211e-11	1.60534	CENPA	5.87771e-226	5.57639	COX14	4.7553e-142	1.55137			PARVG
	GM27201	9.06101e-11	1.68587	CD300LF	2.27705e-225	7.32921	NDUFB4	7.19756e-142	1.50873			PVRL4
	TRIM30C	9.99177e-11	2.26045	FLT3	3.15801e-225	12.5442	FRMD6	2.17773e-141	2.60927			FPR1
	BATF2	1.09356e-10	1.80451	TOP2A	3.20254e-225	9.02201	FOLH1	3.58427e-141	3.82628			TMEM171
	GPR84	1.20948e-10	1.95805	BIRC5	5.39909e-225	10.5678	NAV3	2.03723e-139	4.33466			SLC28A2
	GM27010	1.30456e-10	1.76521	GCNT1	9.60424e-225	6.6982	ECI1	7.84995e-139	1.84359			DPEP2
	SLC13A3	1.33134e-10	4.98814	SNX8	1.74369e-224	3.15838	EPB4.1L4B	1.10631e-138	4.84889			SH3TC1
	6330416G13RIK	1.47366e-10	1.51571	TNS4	3.22845e-224	8.09027	RIC3	1.33542e-138	4.34609			GM15232
	C1QL1	1.56225e-10	2.10701	IFNAR2	3.39055e-224	1.93382	ST3GAL4	1.77278e-138	1.89756			GM9796
	8030453O22RIK	2.19904e-10	2.38518	MBNL1	7.28297e-224	2.3239	SGCE	2.20419e-138	1.63747			ARHGAP11A
	4930522L14RIK	2.35338e-10	1.54996	TRIM47	1.77604e-223	2.35607	SHC4	1.63029e-137	2.67349			ARMC7
	ARID3A	2.81256e-10	1.94387	NSA2	5.97623e-223	2.03133	MRPL51	3.61764e-137	1.62834			MB21D1
	AREL1	2.88267e-10	1.71798	RPS27RT	9.22209e-223	1.81268	HADH	2.30517e-136	1.73303			GINS1
	GAB3	2.98279e-10	1.96649	CMPK1	2.29916e-222	1.77765	ASTN2	3.65139e-136	4.26158			4930486L24RIK
	HIVEP3	3.03112e-10	1.53445	CAPZA1	5.74292e-221	2.03324	GDE1	1.74478e-134	1.65526			GM20703
	GDF9	3.25128e-10	1.92855	SIRPB1A	1.23847e-220	13.0705	B3GNT5	3.71455e-134	3.77685			2610528A11RIK
	NLRP3	3.37946e-10	1.84575	SPTLC2	2.03473e-220	2.24411	NIPA1	1.18157e-133	2.87701			ADA
	ALG8	4.13069e-10	1.69474	SH3BP2	1.42615e-219	5.8778	IL1RAPL1	1.59142e-133	6.58842			TMEM229B
	RP24-319M18.1	5.0827e-10	1.69525	MCEMP1	5.78529e-219	4.86127	STARD10	1.03806e-132	3.53543			GAPT
	PSD3	5.61437e-10	1.62562	PTBP3	1.50378e-218	2.14809	LAMA4	3.12958e-132	2.06361			ALPK1
	HEATR5A	6.19205e-10	1.53602	KCNG2	1.60327e-218	8.48866	TMEM208	4.10544e-132	1.67881			ESPL1
	CACNA1D	7.41172e-10	2.34451	PVRL4	9.87704e-218	8.41887	LMBRD1	4.7286e-132	1.6972			I830077J02RIK
	PQLC2	7.6006e-10	1.58538	CXCR3	2.46987e-217	11.0358	ARHGEF9	2.56934e-131	3.47882			B130006D01RIK
	PARD6B	8.37763e-10	2.22094	GM9733	1.33791e-216	16.4089	DNAJC19	2.18758e-130	1.6796			GDPD3
	FOXRED2	8.44632e-10	1.75823	FBXW4	2.23181e-216	3.25536	FNDC4	4.19523e-130	2.48465			CREB3L3
	TBK1	1.13336e-09	1.51416	ADAM15	8.17932e-215	1.88512	ACOT2	4.72555e-130	2.78169			GM26947
	HPN	1.22449e-09	2.04532	SLC7A7	1.27804e-214	3.08216	SPHK1	7.13689e-130	4.00616			HIST1H1E
	UGCG	1.22812e-09	1.56135	GM13157	1.22446e-213	4.14017	CIRBP	1.13939e-129	1.55731			GM26520
	SIRT1	1.29221e-09	1.6704	TUBA1C	1.29845e-213	2.13997	STARD4	3.69862e-129	2.73891			PHF11A
	SLC14A1	1.40178e-09	2.03964	RPL6	1.46819e-213	1.5899	MMP15	7.10206e-129	2.70131			GM20707
	GM5431	1.50722e-09	2.22238	TRPV2	1.85543e-213	3.02207	HAGHL	1.56569e-128	1.9884			PIK3AP1
	MROH1	1.61993e-09	1.66133	CD244	2.98928e-213	10.1022	ENOPH1	1.79316e-128	2.31769			GM13139
	SNX30	1.72591e-09	1.59215	RPS25	2.02943e-212	1.68655	LRRC8D	2.11571e-128	2.35209			A930007I19RIK
	MYO1G	1.81308e-09	1.53348	IL3RA	2.2709e-212	3.35034	MRPL41	3.85694e-128	1.7619			CAR9
	RASGRP4	2.02036e-09	1.69154	CKLF	4.54016e-212	3.11323	FNTB	6.16979e-128	2.5804			WFDC18
	PLCL2	2.32496e-09	2.11459	LGALS9	8.23451e-212	1.88981	2020-09-09	1.00398e-127	1.8879			DOCK11
	OAZ3	2.47757e-09	2.02419	TNFSF9	8.98516e-212	5.5516	DDR1	1.29238e-127	2.2676			CLEC4D
	ABCB1B	2.7201e-09	1.76652	ABI1	2.16875e-211	2.04941	SLC7A2	3.77215e-127	1.78347			RELT
	SLC26A11	2.74158e-09	1.67598	CLEC4E	3.14423e-211	6.55447	RPE	4.61105e-127	2.24795			2210011C24RIK
	TRPM2	3.01017e-09	2.21109	MSN	1.78987e-210	1.5998	DEB1	5.13934e-127	1.67143			CACNA1F
	SKP2	3.07543e-09	1.67781	VASP	2.15452e-210	1.65159	NPC1	6.36975e-127	2.21372			E330020D12RIK
	RUNX3	3.08589e-09	1.73664	MCTP1	2.74265e-210	6.47073	ABHD6	1.58582e-126	2.37611			PPP6R1
	CXCR3	3.52443e-09	1.84893	RAB43	3.98426e-210	3.66512	CELA1	4.82546e-126	2.80865			RASGEF1B
	LYZ1	3.52859e-09	1.65765	RPS27	7.54921e-210	1.81245	BCL2	4.91011e-126	1.83944			GM15523
	GM15964	3.54523e-09	2.14992	CD38	2.40512e-209	2.92293	CDK19	1.25095e-125	2.75916			D930015E06RIK
	CDS1	3.70013e-09	2.00679	RNF19B	4.71174e-209	4.23509	E2F5	1.72087e-125	2.21726			CARD6
	MTR	4.26876e-09	1.69604	RIN2	4.85759e-208	2.90848	FAM198B	1.89441e-125	1.8867			FGD3
	B3GNT7	4.5166e-09	2.29732	TMEM141	1.31809e-207	2.74766	PIGYL	6.20292e-124	1.81477			AA386476
	RNF38	5.12989e-09	1.55336	P2RY12	1.44504e-207	2.49402	ZFP219	1.87136e-123	2.66236			BTNL2
	SLC46A1	6.24081e-09	1.52565	TSPO	3.97781e-207	1.76791	RAB5A	5.82981e-123	1.64147			TUFT1
	SLC38A7	6.43209e-09	1.54542	CDC42	5.5977e-207	1.68407	PANK3	1.08848e-122	2.65846			5031414D18RIK
	GDF3	6.70882e-09	2.75315	ASGR2	4.30588e-206	9.95163	NTN5	1.76451e-122	3.18793			FAM78A
	GM9725	7.2008e-09	2.2076	C130050O18RIK	5.56958e-206	8.11821	SLC1A2	3.22547e-122	5.284			AI504432
	SLC7A13	7.54941e-09	2.22195	DCLRE1C	1.62385e-205	4.40132	BICD1	3.51802e-122	3.32099			GM4980
	B3GALT4	7.68348e-09	1.52556	PLA2G2D	3.11097e-205	13.0449	CCDC184	5.44738e-122	4.91453			GM12195
	ELF4	9.89379e-09	1.72523	CDCA3	9.12256e-205	7.76495	DAG1	1.05585e-121	2.17022			ADRBK2
	UTP14B	1.05567e-08	1.83442	E2F1	1.03197e-204	3.93056	TLN2	1.32897e-121	2.23515			EMR4
	ARID3B	1.2341e-08	1.97308	ST3GAL6	1.22614e-204	2.15185	NSMF	1.47692e-121	2.37193			SLX4IP
	TRAF3IP3	1.24514e-08	1.64155	GM26510	1.35841e-204	7.58267	SEMA3C	1.84876e-121	3.02394			PYROXD2
	SLC17A9	1.44978e-08	2.03147	RPL37	1.55959e-204	1.59779	COQ7	5.49185e-121	1.83187			SLAMF6
	GM14302	1.47688e-08	1.91269	NFIL3	3.63906e-204	3.81374	GCSH	3.75336e-120	1.84473			RAB39
	RP23-281H4.5	1.73772e-08	1.70397	ROGDI	5.68751e-204	2.3951	GDPD2	6.22193e-120	5.43009			PRIMPOL
	MOGS	2.05298e-08	1.62631	SLC46A3	8.10378e-204	5.33801	NDNF	9.83807e-120	4.2379			F830208F22RIK
	GM26814	2.40475e-08	1.56346	MORC3	9.40957e-204	3.04337	GSTM6	4.11248e-119	3.44464			BC033916
	ZFP646	2.92774e-08	1.61667	ST6GALNAC4	7.59164e-203	2.70297	SLC25A10	5.76585e-119	2.3368			RP23-45A13.4
	PTPN7	2.9887e-08	1.90624	HLX	3.95225e-202	2.82812	TMEM132A	8.14144e-119	3.54771			ATP6V0D2
	CARD9	3.02724e-08	1.8459	HEPACAM2	6.52352e-202	10.2287	MAPK4	1.10888e-118	5.50441			CASS4
	GM21807	3.13672e-08	2.07106	MKNK1	1.17537e-201	2.92979	COL23A1	1.75032e-118	2.4793			9930022D16RIK
	TICAM2	3.52127e-08	1.92631	ADAM8	5.56668e-201	6.3312	MYEOV2	2.99554e-118	1.59929			TRIM14
	PTK2B	3.56414e-08	1.52293	MAPK14	5.61888e-201	2.54986	TMEM55A	5.45413e-118	1.99978			RP24-108I6.2
	SASS6	3.87671e-08	1.64858	RPS20	1.27636e-200	1.60946	PDPN	9.79136e-118	1.53225			GM16192
	PROM2	3.93538e-08	1.78522	GM5150	1.64536e-200	9.64638	CADM2	1.02952e-117	7.33321			CCDC93
	PLAGL2	4.14946e-08	1.77822	RPL11	7.17885e-200	1.57578	RHBDF1	2.72811e-117	1.96602			HAVCR2
	DPF3	4.3663e-08	1.55671	SCAMP2	7.985e-200	1.97825	CAR13	4.14179e-117	2.86086			4933424M12RIK
	TIMD4	4.39198e-08	1.76661	SLFN8	1.38192e-199	6.21498	1110065P20RIK	9.43427e-117	1.80524			A930018M24RIK
	SMIM24	4.68972e-08	1.52472	CYB5R4	1.271e-198	2.23425	ANK3	1.40586e-116	3.80055			GM9920
	KIF21B	6.12512e-08	1.75775	NPL	1.30265e-198	3.89019	SNAPIN	1.94009e-116	1.57618			DDX43
	TMEM104	6.82238e-08	1.58822	PIRA2	5.63141e-198	7.82428	2610035D17RIK	2.14699e-116	2.291			RASGRP1
	IDUA	6.88741e-08	1.52723	ATP6AP2	1.39128e-197	1.79348	RBMS3	2.50185e-116	1.74952			CCDC69
	GM13166	6.91877e-08	1.92242	B430306N03RIK	1.75816e-196	7.49611	NEK1	1.14955e-115	2.4541			CD209A
	TOR4A	7.16001e-08	1.63671	TMCC1	3.26123e-196	3.56297	1700001O22RIK	2.70682e-115	5.39364			FNDC7
	FCHSD2	7.27352e-08	1.51035	NMRAL1	3.39112e-196	3.66542	MAP4	3.04293e-115	1.83323			CD209G
	TBC1D24	8.13826e-08	1.5625	PTGS2	9.6182e-196	7.03514	BAMBI	3.98186e-115	1.50751			ARHGAP30
	GALNT4	8.43014e-08	1.74512	HSPA8	1.08672e-195	1.65784	GM1673	7.64526e-115	2.09958			PALB2
	4930589L23RIK	8.47191e-08	2.00747	UBA52	2.48512e-195	1.9085	PSIP1	2.45363e-114	1.61444			FSD2
	AI427809	8.50834e-08	2.22443	SIGLEC1	5.83791e-195	7.51163	TGIF2	2.08769e-113	2.96			TLR6
	TRIM65	8.58691e-08	1.54811	TFEC	1.82709e-194	7.85267	ANK	2.42822e-113	1.78519			TNFSF14
	RP24-167M10.2	8.79616e-08	1.6442	ARPC5	2.38924e-194	1.64994	COX7A1	2.55201e-113	2.80949			NCAPH
	A830052D11RIK	9.03315e-08	1.81709	SLC28A2	3.64684e-194	8.33146	SPATA13	6.56559e-113	2.96142			E230013L22RIK
	KMO	9.75295e-08	1.54309	RASA4	4.59436e-194	4.13793	SMC5	7.40073e-113	2.22294			ITGAL
	BC147527	1.01132e-07	1.75009	FGL2	2.71182e-193	2.01343	CASC4	8.00574e-113	2.30473			ZC3H12D
	A530017D24RIK	1.02141e-07	1.8613	CD101	7.23872e-193	8.86125	KCTD14	1.86562e-112	3.31469			CD200R4
	F830016B08RIK	1.10403e-07	1.55375	CDCA8	7.54396e-193	6.51085	MANBAL	6.42705e-112	1.63061			TAL1
	GM11707	1.12965e-07	2.05642	RBM3	1.1365e-192	1.67681	OSBPL1A	7.52691e-112	1.68222			GM5150
	SLC13A2	1.20517e-07	1.88111	RPLP2	6.89725e-192	1.64325	CYP2D22	1.69337e-111	2.08699			DENND2D
	IL10	1.5185e-07	1.82741	TMEM150B	2.97836e-190	9.53301	DBNDD2	2.94514e-111	2.55115			ACP5
	GPT	1.72328e-07	1.61016	FNBP1	8.28588e-190	2.82403	CLIP3	6.0756e-111	2.17062			TM4SF5
	GM20634	2.18432e-07	1.55568	RPL10A	2.93351e-188	1.62913	RSPO1	7.63263e-111	3.18939			FCRLB
	TMEM150B	2.21281e-07	1.81777	LMAN2	5.2424e-188	1.61878	MVB12B	9.34157e-111	2.29175			5830432E09RIK
	HECA	2.34361e-07	1.83447	AURKB	3.10541e-187	7.53962	FDXR	1.22453e-110	3.3309			NANOS1
	LNPEP	2.39565e-07	1.6348	PPM1H	7.28149e-187	3.89458	TUBB4A	5.3614e-110	2.16372			GSG1
	TYK2	2.51557e-07	1.69626	I830077J02RIK	1.49021e-186	7.47007	TMC7	7.40263e-110	5.4597			GPR132
	ZSCAN18	2.94163e-07	1.5669	TRIM30D	3.58223e-186	4.94308	MYO18A	8.63385e-110	2.5232			CD209F
	UBIAD1	2.9984e-07	1.54485	5031414D18RIK	2.2626e-185	6.80776	PHLDA2	1.31367e-109	5.34883			HIST1H2BJ
	GM26510	3.057e-07	1.69357	AKR1B3	2.85765e-185	1.64245	PROCA1	2.26408e-109	3.12174			A330040F15RIK
	NAIP2	3.05754e-07	2.02725	IL17RA	4.96002e-185	4.40408	EPHB6	2.42924e-109	2.23196			COX6A2
	TNNI2	3.14857e-07	1.66056	DERA	5.60654e-185	2.97392	FRMD8	6.47488e-109	2.14445			CD209B
	TBC1D4	3.30946e-07	1.5293	MADD	8.8864e-184	4.55603	LRRTM3	8.30035e-109	6.48715			CNR2
	GM13248	3.32605e-07	2.1014	ELF4	1.76721e-183	6.09219	SAR1B	9.13327e-109	1.57022			NRG2
	CD1D1	3.56609e-07	1.62825	UBE2C	1.79387e-183	10.5171	MRPS18A	1.02571e-108	1.63346			BEX6
	2010320O07RIK	3.67838e-07	1.79756	SPIC	3.11394e-183	10.4725	SLC25A23	1.2087e-108	2.27938			C030005K06RIK
	MGAT4A	3.79955e-07	1.8088	GLRX	3.25909e-183	2.1956	OMG	1.81013e-108	6.51015			GM12279
	CMTM4	4.26598e-07	1.52674	PTPN22	3.4593e-182	5.89349	ANKS1	2.94306e-108	3.03618			CD8A
	PCTP	4.47588e-07	1.62469	ETV3	9.96971e-182	4.22969	PANK1	5.01124e-108	3.27128			RNU12
	MYL2	4.59891e-07	1.92974	IFI205	1.07506e-181	16.1219	PIGP	2.12582e-107	1.52881			PSTPIP2
	TBC1D9	4.6099e-07	1.68213	CHST7	1.17557e-181	4.98849	CELSR1	5.0501e-107	4.50232			OLR1
	NEURL1A	5.24678e-07	2.16389	RAB8B	1.32644e-181	2.27772	CAR14	6.39649e-107	2.74661			DNASE1L3
	GM14168	5.36134e-07	1.54038	SGPL1	1.63504e-181	2.76937	ACSL3	1.57564e-106	2.36308			DTL
	RHOX8	5.6447e-07	2.09919	GMNN	2.65062e-180	3.42671	NOL3	7.93183e-106	2.30656			FCRL1
	ACSL4	5.7575e-07	1.51524	ZMYND15	4.38135e-180	6.29662	GALNT6	8.63727e-106	4.89921			PIDD1
	B4GALT5	5.95757e-07	1.50845	PAPD4	1.91759e-179	2.6887	CDH20	9.46948e-106	5.6605			GM21762
	A530040E14RIK	6.01957e-07	1.81714	MOB3C	2.13357e-179	3.64244	CREB5	1.8181e-105	3.06686			OTOF
	PARVG	6.33514e-07	1.6369	DOCK10	3.14535e-179	2.45508	SNX10	2.515e-105	1.96964			LY6D
	PVRL4	7.11253e-07	1.66694	GM2A	9.42328e-179	2.19628	TSPAN6	6.58993e-105	1.89066
	MTHFR	7.23528e-07	1.55032	RPL29	1.00346e-178	1.57843	GULP1	1.23685e-104	2.12088
	FPR1	7.34388e-07	1.56888	RP23-281H4.5	1.13588e-178	5.69451	SLC6A11	1.28924e-104	5.63569
	ZFP791	7.49444e-07	1.70915	NME4	1.78693e-178	3.21835	RBMX	3.51624e-104	1.9336
	ANO8	9.57728e-07	1.70728	IRF2BP2	2.94321e-178	2.87856	SNX32	6.15634e-104	2.74029
	TMEM171	9.9998e-07	2.01823	CERK	4.27394e-178	3.15648	GBAS	6.74672e-104	1.88517
	SLC28A2	1.05152e-06	1.7334	ZFP385A	1.51458e-177	2.86791	DPF3	9.73761e-104	4.4868
	NUAK1	1.1581e-06	1.50319	ARF6	1.82853e-177	1.77745	CHCHD3	1.01268e-103	1.72691
	DPEP2	1.18704e-06	1.71188	TMEM176A	5.04518e-177	2.10272	TGFBR3	1.96736e-103	2.03734
	SH3TC1	1.23801e-06	1.54631	TAP1	6.89325e-177	2.07936	PTK2	3.12726e-103	1.97023
	2310014F06RIK	1.27907e-06	1.58523	CD80	1.16387e-176	7.62132	NKAIN2	7.50733e-103	3.7818
	GM15232	1.33861e-06	1.90516	ARHGAP4	2.02971e-176	5.43532	KRT10	1.74212e-102	2.08084
	MSH5	1.47465e-06	1.98311	ZC3H12A	1.18362e-175	3.95558	MICAL1	1.86149e-102	2.15131
	BRSK2	1.75864e-06	1.6949	NIPA2	2.93058e-175	2.21688	TEX264	3.87246e-102	1.51065
	GM9796	1.7772e-06	2.32412	PCTP	5.94911e-175	4.7054	PEX2	8.50717e-102	1.76424
	NCKAP5	1.91277e-06	1.60718	LY6C2	1.01029e-174	13.6379	AMPH	1.79126e-101	4.622
	HES7	1.96045e-06	1.89079	SLC38A1	8.4831e-174	3.624	VGLL4	5.07117e-101	1.71349
	ARHGAP11A	2.02276e-06	1.76757	FAM96A	1.20318e-173	1.77404	UBE2E3	5.31768e-101	1.53885
	ARMC7	2.06378e-06	1.57642	NAGPA	1.4979e-173	2.14125	DDT	5.52105e-101	1.54763
	MB21D1	2.10587e-06	1.59281	FEN1	1.70642e-173	3.29786	ABCB9	1.04149e-100	3.25235
	GINS1	2.13017e-06	1.56491	CACNA1F	2.431e-173	7.0231	ANLN	2.97048e-100	3.80118
	4930486L24RIK	2.15399e-06	1.66162	TBC1D9	3.0608e-173	5.93484	CTTNBP2NL	4.11975e-100	1.93345
	GM20703	2.15933e-06	1.9002	AMZ1	3.95148e-173	6.2213	ERBB2	8.83967e-100	2.96139
	2610528A11RIK	2.33046e-06	2.02436	HIST1H2AP	1.32828e-172	10.2903	4933439C10RIK	1.15008e-99	2.443
	ADA	2.35076e-06	1.55348	INCENP	1.58758e-172	4.35174	GNPTG	1.57e-99	1.83456
	TMEM229B	2.97558e-06	1.69396	ATOX1	3.39406e-172	1.86569	GRIA3	2.00552e-99	2.91033
	GAPT	3.00907e-06	1.7739	CAP1	5.93591e-172	1.92191	FBXO3	2.08393e-99	1.76443
	CDC42BPG	3.41208e-06	1.54	HCAR2	9.46553e-172	7.73423	POU3F1	2.43072e-99	2.79948
	PIGN	3.45721e-06	1.50754	FKBP15	2.35925e-169	2.67459	CAPN5	3.79834e-99	3.88397
	ADAM3	3.82443e-06	1.69099	SCPEP1	3.54279e-169	2.04592	DIP2B	3.94453e-99	2.31405
	ALPK1	4.05809e-06	1.6672	TMEM171	9.95662e-168	6.78619	SEMA3G	7.21139e-99	2.69609
	GM17168	4.35702e-06	1.62358	CKS2	1.07835e-167	4.42414	ACLY	1.12055e-98	1.76154
	ESPL1	4.38919e-06	1.68395	CLN6	8.01325e-167	2.87516	MRPL13	1.26276e-98	1.73259
	I830077J02RIK	4.88258e-06	1.76789	NINJ1	4.68673e-166	2.42265	4933431E20RIK	1.26424e-98	3.30888
	4931440F15RIK	4.9984e-06	1.83102	GNAI2	1.17459e-165	1.523	SLCO3A1	1.29549e-98	1.62598
	B130006D01RIK	5.22228e-06	1.82829	WWP1	1.62826e-165	2.30152	BAI1	2.29821e-98	5.1054
	GDPD3	5.22889e-06	1.68903	MKRN1	3.29409e-165	1.89156	PFDN1	3.63599e-98	1.5084
	CREB3L3	5.26823e-06	1.87497	FGD3	3.57982e-165	7.07525	JTB	5.35964e-98	1.58517
	GM26947	5.79533e-06	1.67805	RAB20	9.95158e-165	2.88359	OTUD6B	5.84306e-98	2.02052
	HIST1H1E	5.80939e-06	1.72879	CCNB2	4.91395e-164	7.89999	DPYD	7.87918e-98	3.6187
	GM26520	6.30991e-06	1.98407	B4GALT1	1.20778e-163	2.62765	PELI2	8.81005e-98	1.8567
	PHF11A	6.89644e-06	1.53893	SLC40A1	2.56551e-163	8.58113	RASA3	1.45433e-97	2.12271
	ZBTB5	6.94303e-06	1.5414	RPL27A	2.96814e-163	1.5822	CETN2	1.60029e-97	1.54375
	GM20707	7.07985e-06	1.80155	MKI67	8.59806e-162	5.58546	ECHS1	3.82534e-97	1.55321
	PIK3AP1	7.5449e-06	1.88884	RPL12	9.94126e-162	1.57326	SORT1	4.34826e-97	2.26002
	GM13139	7.64512e-06	1.56	IKBKB	3.77677e-161	2.1185	LURAP1L	7.89951e-97	2.05153
	1700028J19RIK	7.65659e-06	1.80655	ACOX3	8.53838e-160	3.0523	NF1	1.03758e-96	2.22014
	PIGB	7.7211e-06	1.57774	GM13212	8.92662e-160	7.34528	ARNT2	1.14614e-96	2.92557
	ZFP369	8.12251e-06	1.61767	MAPKAPK2	1.25194e-158	2.49378	POLR2I	1.22304e-96	1.67352
	A930007I19RIK	8.82186e-06	1.83401	DNASE1L1	1.59068e-158	2.31959	CAR11	1.40196e-96	2.05119
	CTU1	8.91111e-06	1.63482	SMIM24	1.90427e-158	3.78867	CHPF	1.00164e-95	1.74447
	GM14033	9.05847e-06	1.78196	CAMK1	3.16894e-158	1.70013	CLIP2	1.10475e-95	2.71378
	CAR9	9.1056e-06	1.92431	GCH1	3.54687e-158	3.76818	SPEG	4.58401e-95	1.99376
	MYO16	1.01549e-05	1.53203	ATP6V0B	3.9358e-158	1.57053	GPRC5B	4.62688e-95	1.66819
	LIPH	1.04199e-05	2.10319	MS4A4B	4.87001e-158	15.5018	SPIRE2	9.32092e-95	3.2514
	SLC39A12	1.08251e-05	2.03504	PLCB2	5.34757e-158	6.66293	SSFA2	2.16969e-94	2.05765
	C1GALT1	1.11354e-05	1.50767	RNASET2B	9.01111e-158	1.85118	FLRT3	2.20744e-94	3.35126
	GM26853	1.18928e-05	1.52423	DHX58	1.05694e-157	3.4164	EVA1A	3.21089e-94	3.17114
	WFDC18	1.20342e-05	1.72252	RNF149	1.17318e-157	2.88173	ITGB4	3.36371e-94	1.97626
	DOCK11	1.25741e-05	1.54079	RPL22	6.45632e-157	1.57788	IDH3A	3.85923e-94	1.64677
	CLEC4D	1.26903e-05	1.62984	GM20645	7.6568e-157	5.04978	DGCR6	8.56683e-94	1.53838
	RELT	1.31696e-05	1.67736	GNS	1.86788e-156	2.04953	GGT7	1.2921e-93	3.16115
	GM17728	1.33813e-05	1.67544	RALB	1.59394e-155	1.827	MOCOS	5.33763e-93	3.35227
	SETDB2	1.43579e-05	1.56829	PPCDC	2.7679e-155	2.58538	LEPREL4	9.19428e-93	1.78194
	2210011C24RIK	1.67769e-05	2.19915	TMEM221	4.21645e-155	4.39324	1500004A13RIK	1.84031e-92	3.3195
	CACNA1F	1.72044e-05	1.67737	NAIP2	6.04738e-155	5.46415	PCYOX1L	2.95132e-92	2.28823
	GM26714	1.94703e-05	1.58755	IER3	6.21007e-155	1.75392	PXN	3.09378e-92	1.81667
	THADA	1.95516e-05	1.59285	KNSTRN	8.33198e-155	5.22455	DYSF	9.71668e-92	2.7618
	AI429214	2.00692e-05	1.61392	CCNA2	1.22032e-154	7.37253	IL18	9.98166e-92	2.02214
	LMLN	2.18837e-05	1.76072	TES	2.53989e-154	4.19244	ARHGAP5	1.43645e-91	1.72833
	NSUN3	2.1889e-05	1.53547	MCM2	5.48581e-154	3.64334	ASAP2	1.7009e-91	2.72514
	NUP155	2.39275e-05	1.51417	PBK	5.61512e-154	5.95821	CD59B	2.06223e-91	3.10291
	GM16536	2.48742e-05	1.55821	PLAUR	5.85882e-154	3.14421	DNAJB2	4.03939e-91	1.79042
	E330020D12RIK	2.56078e-05	2.03543	CDT1	7.39766e-154	4.19334	LUZP2	5.56924e-91	5.13708
	PPP6R1	2.73006e-05	1.53499	SPN	1.33488e-153	6.61905	CHST3	8.23081e-91	4.56876
	RASGEF1B	2.81289e-05	1.62374	DIAP1	3.05049e-153	2.87099	GSTO1	9.73494e-91	1.84773
	GM16275	3.19544e-05	1.55772	NFATC2	4.05511e-153	3.24441	PIK3IP1	1.62526e-90	1.77637
	GM15523	3.34703e-05	1.54012	GSG1	6.92589e-153	6.96479	FOXO1	2.96483e-90	1.83736
	D930015E06RIK	3.44711e-05	1.76183	GM5428	7.92478e-153	1.66184	TMEM237	2.984e-90	2.07206
	CARD6	3.57563e-05	1.6244	GFER	3.25097e-152	2.16222	SPPL2B	3.31386e-89	2.26651
	FGF11	3.60098e-05	1.53936	RELT	4.5182e-152	4.98485	2810008D09RIK	3.49595e-89	1.94536
	CPA6	3.8456e-05	1.79573	PPP4C	1.02086e-151	1.58232	ACSS1	5.66148e-89	2.70267
	FGD3	3.86125e-05	1.79588	CNPY3	3.87717e-151	1.81544	PHYHIPL	9.79533e-89	3.83346
	GM5141	3.97272e-05	1.56463	CAR9	4.72848e-151	5.99824	GM4258	1.21833e-88	3.23951
	AA386476	4.05736e-05	1.74825	CD300LH	5.62378e-151	8.2176	CLPP	1.87979e-88	1.54945
	BTNL2	4.36184e-05	1.57894	RIPK3	5.95919e-151	3.90685	DALRD3	2.21223e-88	2.04143
	PCDH8	4.37916e-05	1.69416	HK2	6.41264e-151	2.30328	SMOC1	2.467e-88	2.72239
	PHYHD1	4.65213e-05	1.83026	IRF7	1.90711e-150	2.66898	ZFP580	4.44311e-88	1.88519
	TUFT1	4.76528e-05	1.89295	ITGAL	2.57142e-150	6.65893	SRD5A1	6.40183e-88	4.04905
	5031414D18RIK	4.88288e-05	1.54875	TCIRG1	4.03884e-150	2.12526	CTTN	1.07033e-87	1.72172
	FAM78A	5.36419e-05	1.6707	ARG1	6.51954e-150	22.3384	GOLPH3	1.37395e-87	1.76845
	GM15747	5.41949e-05	1.93251	CTAGE5	1.12972e-149	1.8949	SIRT3	3.14165e-87	2.23924
	AI504432	6.02687e-05	1.54805	RAP2B	2.43562e-149	2.43748	PTPLAD1	3.59083e-87	2.08411
	RP23-32C18.5	6.29508e-05	1.81311	MB21D1	3.56437e-149	4.89207	TXNDC15	4.31298e-87	1.52711
	GM4980	6.88084e-05	1.54442	NHLRC3	3.94669e-149	3.43085	PTPN13	4.6683e-87	2.32042
	GM12195	7.01506e-05	1.53513	1700017B05RIK	1.09087e-148	3.38902	SV2B	4.78695e-87	5.10133
	ANKS6	7.26721e-05	1.82046	TPST2	1.47584e-148	1.77352	IFT22	4.86119e-87	1.98468
	ADRBK2	7.43676e-05	1.7639	PTPRJ	4.30418e-148	2.62702	BCL7A	8.14189e-87	2.88955
	EMR4	8.75937e-05	1.52854	ATP8B4	4.75652e-148	6.71005	AMPD3	1.02181e-86	2.42264
	SLX4IP	9.28901e-05	1.67962	RASSF2	6.23235e-148	2.55922	GNAI1	4.55652e-86	1.83776
	KCTD21	9.80203e-05	1.60762	GM13139	2.35099e-147	4.54701	2610316D01RIK	6.93243e-86	5.54914
	AI606181	0.000107035	1.61278	RRBP1	1.32294e-146	1.58191	RAB33B	1.07465e-85	2.19326
	PYROXD2	0.000120465	1.75706	AP2A2	5.59766e-146	2.24842	TRP53I13	1.08028e-85	1.80042
	SLAMF6	0.000120652	1.66541	DPPA3	8.94373e-146	8.96469	E130215H24RIK	1.29057e-85	3.65768
	E2F3	0.00013319	1.55943	PARP1	1.15291e-145	2.4439	RND3	1.37493e-85	2.14135
	RAB39	0.000133961	2.03701	TOR3A	2.91866e-145	2.29077	EPB4.1L4A	3.37095e-85	3.91085
	PRIMPOL	0.00013448	1.52913	AKNA	6.16281e-145	3.84738	MRPS28	5.54718e-85	1.89423
	F830208F22RIK	0.00017167	1.62985	DBF4	7.11674e-145	4.51676	TVP23B	6.92309e-85	1.58904
	BC033916	0.000172019	1.8072	ITPRIPL1	1.13997e-144	3.15311	ANAPC16	1.50349e-84	1.56346
	FGD6	0.000196396	1.81912	AKAP13	2.73101e-144	2.11292	AGAP1	1.60272e-84	2.36252
	RP23-45A13.4	0.000202537	1.5052	TNFRSF17	3.9617e-144	8.37934	CDIP1	1.95896e-84	1.79388
	ATP6V0D2	0.000205571	1.60027	UNC119	4.48178e-144	2.75929	DENND2A	5.39847e-84	2.67467
	CASS4	0.000223673	1.58432	ACVRL1	6.98164e-144	1.55614	CITED1	6.5474e-84	4.81803
	GM26606	0.000236896	1.60511	RPL36AL	1.05782e-143	1.63786	CTSO	6.80086e-84	1.75352
	9930022D16RIK	0.000270574	1.7713	NFE2L2	1.20508e-143	1.84084	FYN	1.05507e-83	1.92162
	TRIM14	0.000278748	1.55985	CHIL3	1.80615e-143	6.98864	TMEM97	1.4533e-83	1.96585
	RP24-108I6.2	0.000279637	1.5792	SMIM3	2.75009e-143	2.39415	TXNDC16	1.84736e-83	2.1687
	CD99	0.000286504	1.50471	RAC3	1.7064e-142	2.77249	G6PC3	2.39082e-83	1.70029
	GM16192	0.000320739	1.74695	CST7	5.60051e-142	8.06286	TCF7L2	2.53866e-83	1.79223
	CCDC93	0.000330275	1.50427	TACC3	1.23645e-140	4.04546	1110004E09RIK	6.48153e-83	1.76261
	HAVCR2	0.000341917	1.61065	XDH	1.60283e-140	2.76956	MAP4K4	8.99912e-83	1.9841
	GM26673	0.000371795	1.58257	GNG2	1.81001e-140	1.70502	ITFG1	2.0218e-82	1.74568
	ADAT3	0.000378002	1.80607	METRNL	2.94738e-140	1.67391	CRYBB1	4.69856e-82	2.6232
	POLR3G	0.000383174	1.57162	SPC24	3.12623e-140	4.52841	SCAMP5	6.17217e-82	2.50746
	ZFP955B	0.000387791	1.65362	PICALM	3.19389e-140	1.88088	GPR19	6.31222e-82	2.6201
	FSCN2	0.000464452	1.73672	NABP1	4.14638e-140	4.19846	VGLL3	1.09172e-81	3.30313
	4933424M12RIK	0.000473767	1.87033	EAR2	5.10375e-140	15.1025	BC022687	2.98446e-81	2.66328
	A930018M24RIK	0.000518117	1.73275	TLN1	1.7132e-139	1.6074	NDP	2.98588e-81	3.094
	GM9920	0.000519764	1.56361	ADA	4.32716e-139	3.6387	SKIDA1	3.38306e-81	3.60361
	GM25517	0.000551503	1.51532	RCBTB2	7.53485e-139	2.14212	CLPTM1	4.0926e-81	1.6217
	DDX43	0.000553054	1.64388	GM4980	1.64344e-138	4.50259	GSAP	5.6979e-81	2.73234
	PKD2L2	0.00060836	1.93658	RAD51AP1	2.34644e-138	5.45594	KLHL5	9.6809e-81	1.94995
	RASGRP1	0.000609404	1.57146	PLEKHF2	3.67602e-138	2.08	4930402H24RIK	2.71089e-80	2.0785
	CCDC69	0.000644293	1.64281	NLRC4	1.34599e-137	6.40741	ESRRA	2.9356e-80	1.9726
	GM10614	0.000645224	1.621	SLBP	1.83826e-137	1.96526	TRIM9	6.0969e-80	4.95475
	SMCR8	0.000699936	1.5728	SIGLECG	6.37216e-137	8.51339	IMPA1	1.09372e-79	1.75898
	CD209A	0.000702539	1.51682	ZFP710	1.04892e-136	3.16178	TULP2	1.27377e-79	5.75555
	FNDC7	0.000770249	2.18837	AI504432	1.19218e-136	6.08556	MMP17	2.39432e-79	3.66555
	SERAC1	0.000778391	1.5621	CCDC12	2.06235e-136	1.58234	ACACA	3.36485e-79	2.38501
	CD209G	0.000793776	2.52499	SLC14A1	2.38101e-136	6.28567	CALR4	5.06157e-79	4.79605
	GM23412	0.000801602	1.53256	UBASH3B	3.89631e-136	3.23922	SUCLG2	5.43849e-79	1.82245
	GM4788	0.000827497	1.50788	SNRPB2	4.10443e-136	1.56098	PPP2R2B	1.04258e-78	3.22909
	POLN	0.000827834	1.50789	2410006H16RIK	5.71274e-136	1.87784	ECE1	1.59479e-78	1.55372
	ARHGAP30	0.000841257	1.51365	CTC1	1.84083e-135	2.84189	INPP5F	2.27026e-78	2.54264
	GM8994	0.000868887	1.59837	STK24	1.90452e-135	2.01934	PRDM16	3.16579e-78	2.82959
	PLS1	0.000870906	1.56971	DDI2	3.35226e-135	2.83357	ACSL6	5.32223e-78	3.80333
	PALB2	0.000879969	1.70735	KIF2C	3.9042e-135	5.79197	ATAD1	5.50054e-78	1.69434
	FSD2	0.000895109	1.70657	RPL10-PS3	6.45662e-135	1.96518	CETN4	1.12539e-77	2.32318
	GM10767	0.000960536	1.568	ANAPC15	2.91268e-134	2.63729	SLC25A18	1.17862e-77	2.83391
	FBXO10	0.00107943	1.5051	IFITM6	5.06335e-134	1.54857	HIST3H2A	2.32647e-77	1.57691
	TLR6	0.00108513	1.70259	ABHD15	2.28412e-133	4.99711	SYNE2	2.83304e-77	1.70699
	RNFT2	0.00111602	1.51713	SNX30	4.17657e-133	3.33317	GM10561	4.33247e-77	3.00421
	TNFSF14	0.00117668	1.5163	CMTM3	6.07493e-132	1.70118	COMMD6	4.91071e-77	1.56014
	FAM83G	0.00118106	1.6155	CDCA5	1.74375e-131	5.12315	LRRC57	5.26669e-77	1.98049
	NCAPH	0.00120126	1.57002	PPP1R21	2.4279e-131	2.67108	TCF7L1	5.97819e-77	2.42779
	GM26737	0.00138516	1.7586	ATP6V0C	2.85427e-131	1.68089	ADAMTS20	6.37006e-77	4.08574
	RP23-193A16.7	0.00139241	1.52295	ANKRD44	2.04791e-130	2.27638	ACOX1	7.90918e-77	2.07364
	E230013L22RIK	0.00145738	1.52612	ADAM33	2.32022e-130	3.3932	UGDH	1.69339e-76	1.82277
	ITGAL	0.00161807	1.72057	MARCKSL1	4.12776e-130	2.37013	GPAM	1.99415e-76	4.11912
	ZC3H12D	0.00163697	1.68089	IL1A	8.26172e-130	12.0826	RBM46	3.0469e-76	4.39606
	CD200R4	0.00181643	1.57617	RPS12-PS3	2.78901e-129	1.84467	P2RY12	6.1863e-76	1.72676
	ZFP873	0.00198884	1.59479	A930007I19RIK	6.37068e-129	6.21541	IZUMO4	1.77448e-75	2.04799
	TAL1	0.00209263	1.53983	PLAU	8.99577e-129	5.8488	ZFP651	2.087e-75	2.43693
	4930404N11RIK	0.00214673	1.68219	GNA13	9.44943e-129	1.85428	CCL27A	2.50621e-75	2.11021
	ZBTB39	0.00227898	1.65612	A530040E14RIK	1.82443e-128	6.01429	KIF19A	3.06364e-75	1.76848
	GM5150	0.00234025	1.51496	RTCB	2.02792e-128	1.61331	NUDT7	6.09396e-75	2.17457
	LIPC	0.0025021	1.53023	CD4	2.35399e-128	7.35351	FARP2	6.84944e-75	3.26181
	MFSD9	0.00279579	1.50912	CASS4	2.72943e-128	6.54833	GIT1	7.29538e-75	2.24054
	DENND2D	0.00280152	1.51667	RCSD1	1.00907e-127	1.94319	KANSL1L	7.56516e-75	2.03396
	CBLN3	0.0029042	1.50156	TAF6L	1.03482e-127	1.60593	AHI1	9.5895e-75	2.28922
	GRHL1	0.00298684	1.75984	5031439G07RIK	1.55507e-127	2.47339	HMCN1	1.35749e-74	2.73384
	ACP5	0.00299068	1.57066	AA467197	1.50755e-126	6.85633	PTPRS	1.36097e-74	2.08663
	TM4SF5	0.00320782	1.60782	MCM6	1.56676e-126	2.68983	FAM63B	1.83157e-74	1.58839
	1700084C06RIK	0.00327677	1.72154	GM4951	2.74178e-126	2.9124	SMARCD1	1.84084e-74	2.05118
	GM17491	0.00334673	1.58684	SH2B3	1.26066e-125	2.34012	SEMA3E	2.16024e-74	5.56049
	FCRLB	0.00337033	1.51486	RTP4	1.61042e-125	2.02111	CD44	2.71537e-74	1.73259
	GM10615	0.00358746	1.66628	WSB1	1.64245e-125	2.00353	RBBP9	3.38874e-74	1.90177
	5830432E09RIK	0.00363302	1.56884	ARHGAP19	2.1385e-125	2.40009	OLFML1	3.54225e-74	2.30669
	ZFP384	0.00376098	1.57666	GAPT	4.97409e-125	6.61197	RPRD1A	7.33306e-74	2.65958
	A530040E14RIK	0.00397806	1.52125	DNA2	1.16256e-124	4.76333	SCN7A	8.79595e-74	4.7613
	GM5145	0.00403803	1.51718	NANS	1.17673e-124	1.76402	JKAMP	3.00598e-73	1.54236
	NANOS1	0.0040821	1.537	SLC43A2	1.29051e-124	2.27549	MAPRE3	3.09501e-73	1.69027
	GM15972	0.00422292	1.54192	4930455G09RIK	5.85714e-124	5.40429	SFXN5	5.33769e-73	2.54034
	GSG1	0.00424092	1.51215	LGALS3	6.6824e-124	2.724	ROM1	1.07304e-72	2.17144
	GPR132	0.004631	1.57886	H3F3B	1.09413e-123	1.5315	COL11A1	1.09233e-72	2.00072
	FAM84B	0.00463274	1.56408	LRRK1	1.82513e-123	2.52905	TBC1D7	1.37006e-72	2.32423
	OLFR920	0.0046438	1.54974	OAS2	2.02557e-123	5.64484	FAM196B	4.7715e-72	5.54828
	GM26624	0.00533502	1.64236	FPR1	4.47055e-123	3.39859	NRCAM	1.42861e-71	2.80004
	ZFP850	0.00548794	1.53319	SKINT3	1.18691e-122	6.98293	KCTD5	1.44316e-71	1.99589
	ZFP85OS	0.00577747	1.56094	CDCA7L	1.26454e-122	4.62475	MGAT3	1.72265e-71	2.0359
	GM10644	0.00599227	1.60456	CPSF4	1.36972e-122	2.75018	TMC6	2.01027e-71	2.20949
	TMEM88B	0.00601783	1.59531	B3GALNT1	3.44128e-122	2.27595	TTYH2	2.25226e-71	2.59887
	FBXO45	0.00624986	1.5004	SH2B2	3.79033e-122	5.03169	2610301B20RIK	2.53481e-71	2.1661
	CD209F	0.00630582	2.17892	CCNB1	4.23518e-122	6.70921	MINK1	3.69673e-71	2.22458
	GM26525	0.00694321	1.56837	AURKA	9.3078e-122	5.16984	APIP	4.45568e-71	1.79143
	HIST1H2BJ	0.00702605	1.58932	LPIN2	1.01437e-121	3.15515	GPD2	1.59393e-70	1.8272
	A330040F15RIK	0.00709437	1.52824	SLAMF6	1.10938e-121	5.84255	SOX6	1.75882e-70	3.3923
	HINFP	0.00813854	1.52254	ACSL1	1.15097e-121	3.20839	GM19705	2.03703e-70	3.15659
	GABRR2	0.00845546	1.67152	TMEM8	2.11598e-121	4.60692	4930469K13RIK	2.32296e-70	6.81497
	COX6A2	0.00931914	1.68307	NEU1	4.11359e-121	1.9697	CDC42EP5	9.70611e-70	1.87644
	GM11574	0.0102523	1.91922	TTC7	6.6551e-121	3.43779	DYNC2LI1	1.19288e-69	1.77236
	ZFP473	0.011622	1.66866	IL10	6.93422e-121	13.0288	GM20515	2.29128e-69	5.30652
	TMEM170	0.0120832	1.52365	GM15232	8.35218e-121	6.57719	IGSF3	2.68027e-69	2.49704
	CD209B	0.0125263	1.95686	1600014C10RIK	1.04762e-120	2.3696	BCKDHB	2.71197e-69	2.40083
	ZFP607	0.0144316	1.89275	IRF2	1.12764e-120	1.84692	BLOC1S1	6.6617e-69	1.55085
	HYAL3	0.0160437	1.74013	MIS18BP1	4.33296e-120	5.06302	CTXN1	8.49985e-69	1.6875
	CNR2	0.0160932	1.56698	GM9493	6.36151e-120	1.83421	NRN1	8.80953e-69	4.38264
	SAPCD1	0.0161317	1.59438	PRDM1	1.16156e-119	4.74116	TXNDC12	1.00023e-68	1.62784
	NRG2	0.016775	1.54675	RPL36	1.34392e-119	1.53748	NUDT3	2.30673e-68	1.90221
	GM26894	0.0175588	1.65861	LAMTOR4	2.73034e-119	1.66613	BC067074	2.58663e-68	3.52291
	BEX6	0.0184096	1.56894	NMT1	2.79899e-119	1.67293	PAQR4	7.41256e-68	2.08167
	FHIT	0.0190399	1.51297	TTYH3	1.57699e-118	2.71684	CD99L2	8.1107e-68	1.84752
	C030005K06RIK	0.021574	1.55296	GDF15	4.1814e-118	10.4265	FAH	1.37802e-67	2.49101
	GM12279	0.0219865	1.68223	GINS2	8.32669e-118	2.81104	STARD3NL	1.58093e-67	1.50185
	9330104G04RIK	0.0249718	1.78141	CD200R4	2.2383e-117	5.76192	9530077C05RIK	2.25708e-67	2.90788
	SLC18A2	0.032741	1.54244	2700094K13RIK	2.44362e-117	1.79857	AGT	2.40177e-67	1.77504
	CD8A	0.0334908	2.19128	UAP1L1	2.92511e-117	1.70192	ACBD4	5.68358e-67	1.90399
	RNU12	0.0348053	1.50597	RACGAP1	7.07182e-117	4.29607	ICK	7.31744e-67	2.28644
	PSTPIP2	0.0373043	1.65913	A530032D15RIK	1.1704e-116	5.48217	SHANK2	9.3427e-67	3.88805
	OLR1	0.0388449	1.60144	JAK3	1.40918e-116	3.34731	IGDCC3	2.47664e-66	3.76411
	DNASE1L3	0.0459583	1.60202	TRPV4	2.14075e-116	4.45048	SPIRE1	3.52279e-66	2.14338
	DTL	0.0493517	1.57482	ELK3	5.11885e-116	2.06079	IFT57	4.14462e-66	1.75887
	GPR143	0.0509214	1.52666	CCDC115	5.74621e-116	1.79749	PCDHGA12	4.65404e-66	1.62471
	E130309D14RIK	0.0547022	1.65119	PTPRE	1.3158e-115	1.7211	EID1	5.64955e-66	1.53644
	TYMP	0.0568904	1.50822	KIF23	2.55777e-115	5.09034	C330007P06RIK	7.16367e-66	1.95309
	GM15859	0.0601971	1.65912	ARHGAP11A	2.70165e-115	4.90333	SLC35A2	7.29054e-66	1.67948
	GM11214	0.0938674	1.59036	UHRF1	4.83432e-115	4.75731	SERTAD2	1.12911e-65	1.86041
	FCRL1	0.0983152	1.63451	RYR1	1.06479e-114	5.74493	COL9A3	1.56662e-65	3.09382
	PIDD1	0.118123	1.51208	NDC80	2.22911e-114	4.59267	SHROOM2	2.8673e-65	2.08612
	CLGN	0.12822	1.55162	MS4A14	4.89569e-114	5.5339	GM27217	6.31492e-65	5.39692
	HOXD11	0.16554	1.54289	SPNS3	4.91518e-114	6.12736	NABP2	6.48486e-65	1.5097
	GM21762	0.271526	1.59375	UBTD1	6.4647e-114	2.35902	TMEM64	8.71386e-65	1.84879
	OTOF	0.474793	1.52472	PLK1	7.12864e-114	5.95892	FAM219A	1.51067e-64	2.02893
	LY6D	0.509171	3.92905	VMP1	9.61135e-114	1.53127	PXDC1	2.21779e-64	1.68486
				CD69	3.35275e-113	7.92048	NCKAP1	2.35642e-64	1.77663
				ID2	5.44176e-113	2.68147	FARS2	2.36684e-64	1.92448
				SPC25	9.62995e-113	4.27568	LYRM5	2.79599e-64	1.87786
				CENPE	1.71525e-112	5.25734	TMEM56	7.18177e-64	3.27244
				SELL	4.95324e-112	7.5665	CBX3	7.73088e-64	1.64444
				CORO7	8.44651e-112	2.37906	VCL	9.61855e-64	1.72145
				ABCB1B	9.46775e-112	4.38568	ARVCF	9.90697e-64	1.95566
				MOB1A	1.36617e-111	1.85025	NUDT19	1.11055e-63	1.72324
				PRTN3	1.40005e-111	16.6339	PCDH7	1.78516e-63	3.15368
				CKAP2L	1.97217e-111	4.40936	1110051M20RIK	1.90669e-63	1.74164
				SRGAP2	2.07345e-111	2.059	CASKIN2	2.02609e-63	1.69465
				NUSAP1	3.16291e-111	5.93747	NPAS3	2.90419e-63	3.37313
				BC033916	3.933e-111	5.84245	CUX1	3.48802e-63	1.71541
				PARVB	9.40222e-111	2.58593	CNKSR2	5.29357e-63	3.46928
				PIK3AP1	9.94826e-111	4.65943	SORCS2	7.76233e-63	2.33963
				LIG1	1.06704e-110	2.733	FUOM	1.87539e-62	1.75348
				GM13710	1.63686e-110	5.04238	FZD3	1.88941e-62	2.41828
				TRAFD1	1.70468e-110	1.75554	CSMD2	2.12756e-62	4.50945
				IRAK4	2.62209e-110	2.43784	BTD	4.3534e-62	1.53943
				OASL2	2.53426e-109	2.20166	KLHL13	5.23952e-62	1.84969
				EXOC6	3.6668e-109	2.89309	CLASP2	5.50352e-62	2.34674
				RAB11FIP5	4.8302e-109	2.54113	GRIA4	6.3858e-62	4.23243
				TTC39B	5.34833e-109	3.69227	ZFP467	7.36255e-62	1.54884
				TPP1	6.78483e-109	1.71095	CKAP5	8.43994e-62	2.17901
				CSTB	6.86949e-109	1.83359	RGL1	9.10449e-62	1.62276
				ZFAND5	7.01448e-109	1.85049	FAM126A	3.07814e-61	2.29959
				RBFA	7.38718e-109	1.63253	PRKCQ	1.58878e-60	3.91099
				4933424M12RIK	1.51955e-108	5.34501	ZFML	3.69199e-60	1.91939
				HAAO	8.65945e-108	5.03716	RPP25L	3.78081e-60	1.66348
				GM10073	3.26139e-107	1.65493	NSMCE1	4.44733e-60	1.58853
				TBC1D14	4.87313e-107	2.37116	SLCO1A5	5.76247e-60	4.07499
				BCL10	1.83169e-106	1.71762	TSPAN14	6.48286e-60	1.65172
				WIPF1	2.23887e-106	2.11041	ATP8A2	6.49047e-60	3.41795
				PDE3B	3.87444e-106	3.03053	DNAJC9	7.37112e-60	1.61608
				RBBP8	4.06483e-106	2.88764	GLDC	1.14582e-59	4.24698
				MIS18A	5.77353e-106	2.17822	C530008M17RIK	1.34681e-59	3.88042
				IFI47	9.06479e-106	1.56866	SLC25A16	5.33377e-59	2.33438
				CEPT1	1.54245e-105	1.58895	MCAM	5.89205e-59	1.50381
				TRPM2	2.55569e-105	4.88474	MSI1	7.6779e-59	3.06579
				TREML2	3.94521e-105	4.66787	TMEM246	1.31845e-58	1.84648
				MFSD11	5.01524e-105	2.16954	ZFHX4	1.96801e-58	2.62398
				RP23-218F13.7	5.34739e-105	6.31571	PDE1A	2.21424e-58	1.65901
				RPL27	6.75891e-105	1.5522	SHISA7	3.27832e-58	4.30647
				DUSP22	1.24365e-104	2.15683	TMEM245	3.28016e-58	1.98961
				RASGRP1	1.39393e-104	5.67278	MICAL3	3.57481e-58	2.04347
				GM5431	1.71158e-104	5.85343	FAM198A	3.60043e-58	3.58324
				CSRNP1	1.76256e-104	2.1089	EPHA7	3.71043e-58	3.82281
				GPR141	5.2855e-104	6.34618	PTPN21	5.09235e-58	2.56649
				SLC35C2	1.36171e-103	1.8873	NHLRC1	6.43246e-58	3.31403
				MAN2A1	2.17849e-103	2.98015	GPHN	7.52787e-58	2.16
				NUP210	2.25803e-103	4.75448	KAT2B	1.42392e-57	2.03889
				KDM7A	3.04948e-103	2.21351	GM14305	1.66752e-57	1.91413
				SKA1	3.79996e-103	4.38853	FAM114A1	1.68878e-57	1.69846
				UMPS	4.71814e-103	2.12615	CCDC107	1.75235e-57	1.51124
				ACER3	4.93132e-103	1.95675	2510003E04RIK	3.18732e-57	1.64734
				ALDH16A1	6.42154e-103	2.39326	MRPL48	6.76774e-57	1.51969
				P2RY10	7.58438e-103	5.89434	WRB	7.92678e-57	2.3047
				XCR1	8.84135e-103	9.19564	AGGF1	1.04533e-56	1.80644
				CRLF3	9.45744e-103	1.7265	EIF3J1	1.29499e-56	1.51005
				SLC2A6	9.98895e-103	4.21243	SLC24A2	1.60385e-56	4.08809
				FIGNL1	1.08713e-102	3.74606	ZCCHC24	1.69299e-56	1.78518
				F10	1.22801e-102	7.35408	SLC25A51	2.84466e-56	1.74695
				IRF4	1.29695e-102	5.63853	EMC8	3.87102e-56	1.73496
				HPS3	1.72782e-102	2.58908	FRMD4A	4.87272e-56	1.93521
				UBE2T	1.99298e-102	3.83504	SIPA1L2	5.78842e-56	2.4677
				AKR1C13	1.34493e-101	2.63187	SLC44A2	8.63529e-56	1.59393
				KCNK6	1.60049e-101	4.3306	SHD	8.72053e-56	3.17648
				PNPLA7	3.17843e-101	3.10471	VTA1	1.28717e-55	1.56287
				ABCA1	6.69932e-101	1.93283	MICALL2	1.33249e-55	2.86422
				PPT1	1.42239e-100	1.53732	MRO	1.98282e-55	2.70165
				SUB1	2.75225e-100	1.71	2310011J03RIK	3.33446e-55	1.56673
				NCAPG	3.38449e-100	4.08496	PARD6A	4.01305e-55	2.1864
				SLC16A3	3.69922e-100	3.20178	PCNP	7.10436e-55	1.51547
				GM26759	4.40526e-100	5.29456	SLC35A5	1.67092e-54	1.88563
				NFKB1	7.80468e-100	1.90157	MYO16	3.61611e-54	3.07532
				ENTPD1	8.76491e-100	1.94731	AI413582	3.71618e-54	1.54165
				ASNSD1	8.94228e-100	1.7693	BCAT1	4.9212e-54	3.63559
				FBL	1.69025e-99	1.51056	CBY1	5.42825e-54	1.67048
				TOR4A	4.07499e-99	3.61041	CTTNBP2	8.44118e-54	2.00045
				DEF6	6.50285e-99	2.76095	KCNMB4OS2	1.07813e-53	3.47467
				RNF114	7.08101e-99	1.74308	MYH14	1.11859e-53	2.94654
				APOBR	7.58866e-99	3.33644	ASB8	1.13039e-53	1.86534
				NCOA3	1.86665e-98	2.24562	LRFN4	1.34057e-53	2.81865
				ACP2	1.47288e-97	1.97818	DNAJC1	1.42538e-53	1.55694
				CSF2RB2	1.50857e-97	3.55764	PTPMT1	1.64928e-53	1.53911
				GDPD3	1.67844e-97	4.00543	DNAJB12	2.18537e-53	2.15677
				SYNJ1	2.11843e-97	2.27589	SH3KBP1	2.49378e-53	1.79436
				NCAPH	3.86242e-97	4.3251	MAP1A	3.30774e-53	1.88998
				FPR2	6.76954e-97	3.49892	ANTXR1	3.51156e-53	1.93933
				TUBA4A	9.13795e-97	3.4663	SHF	3.78071e-53	2.78361
				G6PDX	9.66199e-97	2.20773	CLMN	4.93356e-53	2.79465
				LTB	1.15097e-96	8.25964	SGCD	7.12156e-53	3.68598
				ALDH1B1	1.40751e-96	4.49094	MDGA2	9.92181e-53	3.53074
				DDX39	2.12364e-96	1.75074	FIBIN	1.25603e-52	1.88105
				MAP3K14	2.1894e-96	2.85394	TAB2	1.38627e-52	1.81635
				TMED5	2.40165e-96	1.52496	RALGDS	2.08442e-52	1.86571
				9030617O03RIK	2.73481e-96	3.61669	CIB1	2.17763e-52	1.53286
				PISD	5.27541e-96	1.86837	MEGF11	3.0223e-52	3.83311
				CLEC9A	7.55732e-96	5.95919	NPB	4.2326e-52	4.83186
				TIMD4	9.40314e-96	8.14557	LRCH3	5.16921e-52	2.02317
				VPS26A	1.87464e-95	1.55786	DEPTOR	6.60802e-52	1.89696
				AP1G2	1.057e-94	3.06718	CEACAM1	8.25336e-52	2.09761
				PPT2	1.08276e-94	1.70933	FGFBP3	8.57434e-52	2.22527
				KCNAB2	1.49734e-94	2.30687	PACRG	1.26505e-51	2.09477
				CMAH	2.41312e-94	4.54411	STOX2	1.30605e-51	2.37768
				RNF213	5.44155e-94	2.4014	ZSCAN2	1.61573e-51	2.55429
				FAM107B	6.05395e-94	2.15767	RAPGEF5	1.74394e-51	3.41265
				NAIP5	8.03119e-94	4.34863	FANCC	1.80943e-51	2.1947
				BCL2A1C	2.32369e-93	4.82016	NXT2	2.18645e-51	1.7142
				DOCK11	8.12721e-93	2.97432	GRIK5	5.7368e-51	2.63387
				N4BP2L1	8.97057e-93	2.6536	A530076I17RIK	5.92117e-51	3.91462
				GM20703	8.97825e-93	5.29573	MPP5	1.10335e-50	2.03214
				BRMS1	9.10333e-93	1.69803	2010204K13RIK	1.19235e-50	2.44309
				GALK2	1.55772e-92	1.86616	CCDC157	1.31962e-50	2.47533
				BUB1B	1.98441e-92	3.95825	ADAM11	1.45876e-50	4.31844
				SULT1A1	2.49067e-92	1.61364	TMEM40	1.83054e-50	2.18673
				OASL1	3.39269e-92	4.32077	PXYLP1	2.07789e-50	2.70134
				SMARCD2	3.74367e-92	1.66052	HIPK2	2.56235e-50	2.04913
				TCEB3	4.17155e-92	1.95604	SPINK2	4.51737e-50	3.59366
				ARHGEF39	4.7486e-92	4.02176	XRCC5	7.53913e-50	2.3014
				HEBP1	9.03996e-92	1.90212	MYO6	1.61199e-49	1.88892
				PLEKHA2	2.01131e-91	2.046	PHACTR1	2.43416e-49	2.06123
				HIST1H1B	2.0364e-91	4.91026	MBLAC2	2.94767e-49	2.28818
				NAAA	2.06914e-91	2.21646	MPV17	3.78827e-49	1.55758
				RIN3	7.11878e-91	2.46309	4930444P10RIK	3.85676e-49	3.49171
				MELK	8.23634e-91	4.03888	TMCO3	6.13598e-49	1.74351
				FAM213B	8.97156e-91	1.81868	SLC35G2	6.67471e-49	2.61723
				MEF2A	1.16472e-90	1.69244	OSBPL7	8.16955e-49	2.40806
				PAFAH1B3	1.19826e-90	2.18342	1190005I06RIK	8.25386e-49	3.48155
				8030453O22RIK	1.25403e-90	4.4431	ARHGEF40	1.10266e-48	1.81593
				HMMR	1.38763e-90	4.61403	ZFP462	1.26406e-48	2.44143
				FCNA	2.7645e-90	7.14323	FKTN	1.46153e-48	2.17124
				SNX29	2.77929e-90	3.04589	DEPDC7	1.67748e-48	2.22202
				FAM64A	3.29433e-90	4.35731	CYP4F13	2.30324e-48	1.83361
				AI427809	4.61738e-90	4.20894	TRIO	2.74984e-48	2.07109
				KDM2B	1.01027e-89	2.14447	SLC25A13	2.76579e-48	2.46534
				NT5DC2	2.73878e-89	1.69885	FAT1	3.62411e-48	1.76428
				TRIM12A	3.21521e-89	1.87341	ANKRA2	5.98867e-48	1.78088
				IRF9	4.03271e-89	1.71191	OLFML2A	7.59228e-48	1.55145
				NEIL3	6.48718e-89	4.5488	2900052L18RIK	8.34586e-48	2.46999
				WDR89	1.04277e-88	1.60228	ETNK1	1.21179e-47	1.74648
				PIGZ	1.07819e-88	3.40704	ARFIP1	1.7289e-47	1.64454
				SORL1	1.42999e-88	3.2078	AHNAK2	1.86961e-47	2.08187
				USP18	1.61561e-88	2.54485	SLC22A23	1.92902e-47	3.47809
				TBC1D22A	2.97454e-88	2.27785	SLC12A4	2.89066e-47	1.5155
				PTPRCAP	3.20726e-88	10.9601	2010320O07RIK	3.56092e-47	3.75423
				ATP6V1B2	4.01781e-88	1.55162	SARS	3.63672e-47	1.58665
				STK4	4.71171e-88	2.36467	OLFM2	3.64701e-47	3.68608
				FAM46C	4.82186e-88	3.26788	PRPF19	3.90943e-47	1.51711
				HN1L	7.55943e-88	2.17899	PYURF	5.64674e-47	1.52727
				A430104N18RIK	1.20398e-87	4.68962	MACROD1	6.24244e-47	1.91432
				KLF3	1.54776e-87	1.89478	TMEM180	6.26689e-47	2.33478
				UNC13D	2.18754e-87	3.7078	PPARA	7.22391e-47	3.25803
				NAIP6	3.98438e-87	4.35333	ABCB8	1.19172e-46	1.99653
				CTSE	5.19233e-87	11.2544	TMEM38A	1.58289e-46	1.94125
				HMGCL	8.55676e-87	1.64942	HDAC4	2.92803e-46	2.06773
				MGAT4A	1.56516e-86	3.34597	AMN1	3.32143e-46	1.77811
				TAOK3	1.68463e-86	1.75586	DTNA	6.78707e-46	2.11466
				IL4I1	2.15082e-86	8.94265	NDE1	7.01888e-46	1.55558
				CCL5	2.30835e-86	14.7346	ACVR2A	7.28745e-46	2.24143
				KIFC1	3.5204e-86	3.98147	JAG1	1.41051e-45	1.54927
				CORO1C	3.73361e-86	1.5736	PITHD1	1.57628e-45	1.59421
				MX1	4.28597e-86	4.78593	RP23-61B8.2	1.98877e-45	4.32604
				ZNRF2	4.93191e-86	2.75512	TMEM107	2.68462e-45	1.51732
				EPS15	1.32423e-85	1.71972	RARB	2.70111e-45	2.10234
				COX6A2	1.63561e-85	9.37467	KCNC3	3.1903e-45	3.62859
				AP1S3	3.14782e-85	4.46228	PARD3B	3.43474e-45	2.01916
				BC049352	4.95327e-85	5.59484	TNFRSF12A	4.62096e-45	1.66892
				SHCBP1	6.60871e-85	3.97687	RAB13	4.9485e-45	1.60226
				IPCEF1	1.04746e-84	4.67358	PISD	7.32388e-45	1.56916
				IMP4	1.5553e-84	1.55307	NWD1	8.08492e-45	3.32355
				SQRDL	1.76152e-84	1.73534	ETV1	1.11442e-44	1.58208
				SUSD1	2.56098e-84	4.82983	AP4S1	1.25862e-44	1.54094
				CASC5	2.703e-84	3.69532	ZKSCAN1	1.42112e-44	2.03126
				NFKBIE	2.70569e-84	2.60135	FAM107A	2.47308e-44	1.62096
				GM14548	3.42417e-84	4.3213	CDC42SE1	5.29984e-44	1.52871
				CD22	4.14926e-84	4.45682	1700113A16RIK	5.49693e-44	2.74183
				SPINT1	4.52705e-84	2.84974	SCRG1	6.01312e-44	2.50985
				TM4SF5	6.64146e-84	4.98348	ZFP931	7.44893e-44	1.90233
				TESPA1	7.13801e-84	4.43352	HEXIM2	7.63163e-44	2.61875
				HPSE	7.17277e-84	4.56885	KLC3	8.29622e-44	3.87796
				KIF20A	9.62477e-84	4.12335	EHF	9.76136e-44	3.26245
				GADD45B	1.14981e-83	1.75087	ANKRD46	1.54638e-43	1.63303
				TNFRSF18	1.58393e-83	5.88946	BET1	1.87928e-43	1.5074
				EED	2.08828e-83	1.76257	AGPAT3	2.23767e-43	1.64829
				DNASE1L3	3.38894e-83	5.71901	MED31	2.39527e-43	1.51728
				BACH2OS	4.42518e-83	4.16639	TIMM10	2.61495e-43	1.64417
				ARL10	4.52888e-83	2.61078	GM16062	4.64194e-43	3.13268
				GDF3	8.06058e-83	8.40038	GM6710	5.44791e-43	1.95744
				KYNU	9.05074e-83	4.6959	PCSK5	6.07321e-43	1.90689
				DR1	1.98584e-82	1.94908	OXA1L	6.11532e-43	1.65863
				CTSD	2.22832e-82	2.63542	ECHDC2	1.0586e-42	1.87358
				DSCC1	3.27322e-82	3.95801	PPP1R35	2.17815e-42	1.55481
				TFE3	8.26041e-82	2.02695	TMEM41B	2.80179e-42	1.73553
				CENPF	9.61157e-82	4.73013	E330009J07RIK	5.41437e-42	2.884
				BTLA	1.33992e-81	4.55887	SAT2	6.54223e-42	2.05135
				FCRL1	1.50639e-81	4.05192	SLC22A4	7.45322e-42	2.6351
				RAD51	1.52999e-81	3.3133	TMEM138	8.75569e-42	1.77096
				ENGASE	1.86061e-81	3.08675	IL17RC	9.23384e-42	1.69472
				MKNK2	3.32161e-81	1.91901	NAPEPLD	9.98978e-42	2.50807
				STK10	3.83455e-81	2.508	5330434G04RIK	1.36025e-41	3.80503
				ALG8	4.47623e-81	2.28731	MANEAL	1.47302e-41	3.82777
				GM12166	3.62842e-80	2.4413	MORN4	1.52688e-41	2.7189
				TRIAP1	4.15513e-80	1.58969	E130307A14RIK	1.64246e-41	2.05391
				DUSP5	7.96851e-80	3.18563	GM20501	2.36733e-41	3.88251
				4930486L24RIK	8.35597e-80	4.15001	PRR7	6.11119e-41	1.79948
				CCNF	1.10322e-79	3.68593	GM17396	8.91571e-41	2.62125
				FOSL2	1.19659e-79	2.15095	ARAP2	1.18362e-40	1.7926
				E2F2	1.27347e-79	4.28368	FZD8	1.96314e-40	2.43899
				ESCO2	2.18819e-79	4.04445	KLK8	2.11546e-40	3.6472
				DNAJC15	2.8294e-79	1.52457	CDC37L1	3.10638e-40	1.78759
				ARID3A	8.20772e-79	3.53466	TOM1L2	3.91716e-40	1.98171
				RAP2C	8.85835e-79	2.33252	RHBDD2	5.77135e-40	1.96716
				GIT2	1.18521e-78	1.89992	DOCK7	7.38271e-40	1.82947
				CENPK	1.50055e-78	3.67165	BMPR1A	7.66704e-40	1.70606
				APITD1	1.53832e-78	2.75869	GM10863	8.16259e-40	3.29377
				PSEN2	1.79073e-78	1.891	PAG1	8.66192e-40	2.02181
				CDKN3	2.33614e-78	3.83198	TDRKH	9.76875e-40	2.32965
				GM15987	4.60262e-78	2.89477	CPLX2	1.11375e-39	2.37347
				FFAR4	5.31329e-78	5.21297	RAB2B	1.12903e-39	1.88141
				ESPL1	8.00777e-78	3.25345	UPP1	1.16012e-39	1.88675
				CENPM	8.93041e-78	3.01506	D630045J12RIK	1.45884e-39	2.50503
				KIF11	1.19265e-77	3.86814	TRIM32	1.70591e-39	1.77476
				LYVE1	1.30997e-77	4.8812	S100A3	1.7083e-39	2.8592
				COLGALT1	1.32318e-77	1.61398	B9D2	1.72818e-39	1.6958
				CENPH	1.95468e-77	3.72702	ACOT11	1.77391e-39	2.4105
				MXD3	2.2247e-77	4.00648	TMEM62	2.01023e-39	2.14737
				IMPA2	2.57927e-77	2.25693	2410002F23RIK	2.23404e-39	1.8037
				PKP3	3.11212e-77	4.58581	SRCIN1	2.24068e-39	2.42851
				ELF1	4.32426e-77	1.73455	CHIC1	3.64682e-39	2.75028
				GM11974	7.41678e-77	2.58872	EFCAB12	5.70225e-39	2.86654
				CBFA2T3	1.03222e-76	2.28104	TTC38	1.71106e-38	2.20769
				CORO2A	1.113e-76	3.7547	USP51	2.53288e-38	3.49485
				C030005K06RIK	1.21845e-76	4.19819	TECPR1	2.68787e-38	1.79964
				TREML4	1.71983e-76	4.38156	PHLDB1	4.22696e-38	1.75319
				SLC15A4	1.74995e-76	1.88894	4632427E13RIK	4.2913e-38	1.52062
				ABCA14	2.31934e-76	4.57426	CUBN	4.31473e-38	3.28947
				GM11808	3.16747e-76	1.61006	ARMCX3	5.45482e-38	1.51156
				GM13012	3.20242e-76	3.99251	GM15440	7.40074e-38	4.00021
				OAS3	5.50505e-76	4.4844	GFRA3	7.94457e-38	3.19253
				MMP9	6.92456e-76	2.79013	1810010H24RIK	1.07878e-37	2.31073
				SWAP70	7.15134e-76	2.01494	WDR35	1.91839e-37	2.21193
				IRAK2	7.31356e-76	2.31762	C130021I20RIK	1.94517e-37	3.20307
				TBC1D8	7.81473e-76	2.82161	ACBD5	2.05081e-37	1.65785
				NUBP1	1.58417e-75	1.73491	PDE7B	2.82245e-37	2.14204
				FAM78A	1.69622e-75	4.31161	STXBP3A	3.13465e-37	1.55763
				GM8369	1.82921e-75	5.77443	MACROD2	3.15132e-37	1.96387
				DPP4	2.15742e-75	3.72022	SH3TC2	3.25752e-37	2.64657
				CRYL1	2.5517e-75	1.71679	PPFIBP1	3.51364e-37	1.70764
				XLR4B	4.36665e-75	4.02354	EPHB1	5.23264e-37	3.23217
				CHAF1B	4.76037e-75	3.02012	TWF1	5.42663e-37	1.57681
				AK2	6.80181e-75	1.56593	C030037D09RIK	6.23894e-37	2.75547
				NUCB2	7.11931e-75	1.63134	MMP28	6.55976e-37	2.84927
				UBE2F	2.48482e-74	1.54746	HAPLN1	9.69032e-37	2.97283
				AKR1B10	2.52826e-74	1.63261	2410016O06RIK	1.27261e-36	2.07806
				VNN3	2.63095e-74	4.01579	LGI3	1.5065e-36	2.80941
				PDE4B	2.89455e-74	1.84657	RAB31	1.84445e-36	1.70383
				ARHGEF6	4.4003e-74	1.76121	SLC25A42	2.35365e-36	2.41061
				HPN	5.0121e-74	4.34422	ATL1	3.15297e-36	2.16521
				PRC1	5.6707e-74	4.12775	TBL2	3.15716e-36	2.37157
				TPM3-RS7	6.47941e-74	2.42486	PLD6	4.03695e-36	3.48815
				CDC42SE2	7.16504e-74	1.57049	MTCL1	5.59292e-36	2.07863
				IL1RL1	8.32668e-74	4.72154	PLCB4	6.21151e-36	1.63158
				SNX9	8.93543e-74	2.07481	SRGAP1	6.62998e-36	2.76983
				CDCA2	9.51408e-74	3.13743	RP23-410L16.1	7.35378e-36	1.74958
				C130026I21RIK	1.6516e-73	3.77903	ELMOD3	7.51225e-36	1.92794
				TPX2	1.7458e-73	3.39462	PDK2	8.08383e-36	1.70864
				AFTPH	4.02346e-73	2.02178	MID2	8.35881e-36	2.38369
				PARP8	4.6518e-73	2.52239	NAT14	1.04306e-35	1.81471
				PEPD	4.98939e-73	1.56358	ALDH6A1	1.14601e-35	1.60438
				BCO2	8.17282e-73	3.92817	SIGLEC5	1.16122e-35	4.00689
				GPR137B-PS	1.05118e-72	2.36394	TCF12	1.44971e-35	1.52483
				ARHGAP17	2.01423e-72	2.00046	PTGES2	1.83286e-35	1.68693
				ANKRD13A	2.31966e-72	1.79461	FRAS1	1.88245e-35	2.98772
				MGAT5	2.84638e-72	2.37902	SF3A1	2.28296e-35	1.67759
				MED11	3.23332e-72	2.25761	LRRN3	2.33594e-35	1.60979
				TRIM25	3.97815e-72	2.38152	WBSCR17	2.39101e-35	2.42908
				NMD3	4.08549e-72	1.75687	ADCY2	2.86618e-35	2.46802
				DONSON	4.38773e-72	2.67417	BCHE	3.19933e-35	3.22771
				GAB3	5.3549e-72	3.20515	FAM188A	3.26145e-35	1.57818
				CERS6	8.41e-72	2.95997	ZFP2	3.70164e-35	2.37477
				FCGRT	1.00114e-71	1.72604	NEK8	5.06259e-35	2.09715
				AUNIP	1.02306e-71	3.27184	DENND5A	6.89487e-35	1.59481
				ERI1	1.10742e-71	2.00288	APOO	8.35831e-35	1.61328
				NEURL1A	1.11133e-71	4.47224	GTDC1	1.00375e-34	2.6109
				TBC1D10C	1.50045e-71	4.14353	FBP1	1.34553e-34	2.43476
				H2AFY	3.12665e-71	1.57158	RP23-405O11.1	1.34946e-34	1.853
				BTG1	4.23872e-71	1.64343	EHBP1	1.74627e-34	2.35528
				TBC1D31	4.3083e-71	3.08731	ATRN	1.95635e-34	1.95822
				AXL	5.21526e-71	1.68619	PGK1	2.98849e-34	1.55714
				FANCL	5.92231e-71	2.39553	ZFP663	3.8144e-34	2.78472
				4930506M07RIK	6.30477e-71	2.0569	ZFP516	4.30882e-34	2.11763
				EMR4	6.83524e-71	5.36117	ZMYND8	4.78986e-34	1.79344
				GINS1	7.17268e-71	2.49979	BOLA1	5.04227e-34	1.50505
				PNPLA1	1.07376e-70	4.73343	TSEN15	7.22738e-34	1.53254
				TRIM59	1.30023e-70	3.17	IYD	7.31176e-34	2.86279
				OTULIN	1.64594e-70	1.77202	SLC4A2	8.1112e-34	1.78325
				MEFV	2.07801e-70	4.44722	TOM1L1	8.41669e-34	2.26884
				TRIM5	3.81331e-70	2.67063	WDR54	8.75808e-34	2.10186
				FCRLA	7.19038e-70	6.22864	ZC3H14	8.82767e-34	1.53221
				TUBB6	7.23786e-70	1.60285	C030039L03RIK	1.1244e-33	2.22451
				SGPP1	9.56275e-70	1.81182	NRADD	1.20914e-33	1.55011
				SMC4	9.73632e-70	2.06829	WDFY1	2.12116e-33	1.54299
				IQGAP2	1.04087e-69	1.84208	UCN2	2.36512e-33	5.44285
				TREM1	1.07697e-69	2.90811	LRRTM4	2.87088e-33	2.83312
				APOC4	2.15381e-69	4.42943	MTMR10	4.54595e-33	1.95889
				MMS22L	3.23231e-69	3.02146	1810043G02RIK	5.10776e-33	1.76236
				OGFR	3.41708e-69	1.55519	CPEB2	5.55735e-33	1.89731
				KPNA4	3.44206e-69	1.6563	PRR3	5.65086e-33	1.85284
				KLC4	4.28636e-69	1.91836	HACL1	5.79658e-33	1.84134
				RAB11FIP1	4.56532e-69	3.69078	RBPJL	7.50903e-33	3.21514
				SGOL1	4.74152e-69	3.46692	SLC25A1	7.54266e-33	1.60832
				TRIM30C	7.83287e-69	4.58179	NEK4	8.19211e-33	2.47294
				FEM1C	1.17778e-68	2.15159	HUNK	1.10253e-32	3.123
				ZC3H12D	1.51284e-68	3.91397	STK32A	1.58156e-32	4.0945
				DNAJC2	3.22641e-68	1.53338	ARMC2	1.59422e-32	2.10541
				RFC2	4.47826e-68	1.52804	OSGIN2	1.68829e-32	1.69177
				LILRA6	5.58568e-68	4.02848	FUZ	1.97276e-32	1.7163
				AGPS	1.38142e-67	1.97356	TMEM17	2.29587e-32	2.02706
				PLXNB2	1.5539e-67	1.64421	PTPN12	2.61335e-32	1.78402
				G430095P16RIK	1.8067e-67	3.70341	RABGGTA	3.81796e-32	1.90844
				FLCN	2.01994e-67	1.92878	RAB3IP	4.14676e-32	1.9148
				CD209D	2.13409e-67	8.74749	SLC25A15	4.97158e-32	2.0385
				NCAPG2	2.19005e-67	2.78987	B230112J18RIK	7.58663e-32	3.06315
				SESN1	2.51726e-67	1.6506	KIF3A	1.03124e-31	1.57564
				MMP12	3.44171e-67	9.05795	GALNT16	1.1137e-31	1.52324
				FKBP5	4.92425e-67	2.02192	INF2	1.50398e-31	1.71995
				TGFBR2	6.24852e-67	1.5451	2010107G23RIK	1.62755e-31	2.47566
				TNFSF14	6.74528e-67	4.11335	ARHGEF10L	1.62882e-31	2.0981
				MYD88	3.23018e-66	1.53718	SPSB2	2.07724e-31	1.57442
				GLB1	3.25321e-66	1.7519	LY6G6D	2.31982e-31	2.3505
				FNDC7	4.43227e-66	4.53604	PTPN3	2.72404e-31	2.42114
				9930022D16RIK	5.18105e-66	3.76963	CCDC37	3.29759e-31	1.6005
				BMP2	6.11942e-66	3.82759	LTBP2	3.67409e-31	2.29702
				TCTEX1D2	6.81647e-66	1.6418	AGFG2	3.80594e-31	1.61924
				MCM10	8.15458e-66	3.12958	DIRC2	4.63919e-31	1.70081
				PPBP	1.20842e-65	4.98991	REPIN1	5.01205e-31	1.82919
				MFSD12	1.47489e-65	2.38162	FAM216A	7.44151e-31	1.58506
				RASGRP3	1.98519e-65	2.17786	SCARB2	7.87746e-31	1.67143
				FUT7	2.34283e-65	3.45595	FAAH	8.34253e-31	2.30958
				SLC17A9	2.61357e-65	3.85835	CHKA	1.13737e-30	1.60879
				TMEM229B	2.84512e-65	2.94025	HIST1H2BE	1.24363e-30	2.27926
				RIPK1	2.88462e-65	1.86196	PKIA	1.24503e-30	1.93483
				TMEM206	3.7781e-65	2.3055	FBXL4	1.25072e-30	1.92654
				TMEM251	4.55692e-65	1.67349	ADAMTS7	1.28336e-30	2.63543
				TMEM123	4.90934e-65	1.5526	TMSB15L	1.49864e-30	2.44786
				MMP13	5.2189e-65	3.68188	EFNA2	1.71798e-30	2.03969
				PLAC8	5.60795e-65	7.98315	CHD7	1.72e-30	1.54931
				DNAAF3	6.28595e-65	2.729	2210408F21RIK	2.27799e-30	1.8281
				IL27	1.00345e-64	3.80672	9130020K20RIK	3.07549e-30	1.97006
				LBR	1.93139e-64	1.85045	ITPA	3.26847e-30	1.54809
				FAM110A	3.38435e-64	2.01481	VPS37C	3.41476e-30	1.9259
				GM15964	4.00217e-64	3.81267	COASY	3.51587e-30	1.69175
				APAF1	6.52058e-64	2.6402	FAHD2A	3.929e-30	1.79467
				SLC25A37	7.22445e-64	3.39745	4933407L21RIK	5.16752e-30	2.35125
				SLPI	8.66179e-64	2.82731	1700088E04RIK	7.9234e-30	1.56283
				ATXN7L1	1.3312e-63	1.88096	MUSK	8.21923e-30	2.78746
				OPHN1	1.56425e-63	1.86034	PCDHB7	9.39878e-30	2.67227
				E330020D12RIK	2.67038e-63	3.51201	GM26814	1.14198e-29	2.62187
				ERLIN1	2.7595e-63	2.3153	YAE1D1	1.14651e-29	1.85793
				IL15	3.71719e-63	2.29872	SOX5	1.31351e-29	1.77544
				SHKBP1	4.00672e-63	1.79454	PRODH	1.53639e-29	1.67226
				E2F8	4.0693e-63	2.96627	RARA	1.54047e-29	1.7231
				SPPL2A	4.4441e-63	1.85644	NLGN1	1.58296e-29	3.1294
				CLEC2D	7.0221e-63	1.82601	TMEM198B	1.69267e-29	1.68041
				CDS1	1.21671e-62	3.83651	P4HTM	1.84685e-29	1.85687
				VPS18	1.27711e-62	2.15802	AMD2	2.27119e-29	2.86297
				UVRAG	1.36761e-62	1.92061	PCDHB10	2.274e-29	2.82021
				ARHGEF2	1.74196e-62	1.59473	NGRN	2.33867e-29	1.53701
				5031425F14RIK	1.93908e-62	3.57164	LENG8	2.34342e-29	1.54045
				PLA2G4A	2.05697e-62	1.97929	SDK1	2.46269e-29	2.44856
				CACNA1D	3.76854e-62	3.6976	TBC1D12	2.54377e-29	1.75392
				BEX6	4.46036e-62	3.81012	GM11266	2.69449e-29	2.78847
				GLA	6.27307e-62	2.38547	RAB36	3.43612e-29	2.3323
				IL18BP	6.49681e-62	2.20605	DPYSL5	3.45579e-29	3.04917
				RP23-326F22.4	6.96563e-62	3.78078	MLST8	3.57758e-29	2.36736
				A630033H20RIK	8.32477e-62	3.66819	PPP1R3F	3.719e-29	2.52567
				LBX2	9.33422e-62	3.28008	LRAT	3.81107e-29	2.53954
				TGM1	9.69279e-62	3.59616	ZFP276	3.95761e-29	1.91819
				KIF15	9.76798e-62	2.86671	TUSC2	3.97153e-29	1.50368
				CCDC86	1.03647e-61	1.66782	USP32	4.26401e-29	1.79097
				2610528A11RIK	2.02148e-61	3.34931	CDK6	5.60101e-29	1.64806
				IL7R	2.09626e-61	3.83146	SEMA6A	6.56111e-29	1.64156
				ABCD2	2.66252e-61	2.77379	CLASP1	6.84222e-29	1.91418
				B4GALT5	7.17581e-61	2.50201	H2-KE6	6.90643e-29	1.54757
				PLEKHB2	2.23653e-60	1.61333	PCYT1B	8.78574e-29	2.55417
				TRIM14	2.27507e-60	4.0774	FAM229B	1.03304e-28	1.84843
				NUF2	3.7333e-60	2.56612	ZFP180	1.24477e-28	2.01282
				CEP55	6.77684e-60	3.31405	D630024D03RIK	1.27638e-28	2.89154
				MS4A4A	7.36371e-60	3.77144	6430590A07RIK	1.34853e-28	1.81778
				PARP2	1.56683e-59	1.66631	D19BWG1357E	1.53933e-28	1.64772
				CLSPN	1.57998e-59	3.07146	GPR37	1.55675e-28	1.9483
				BCL11A	2.05931e-59	4.66352	P2RX7	1.61848e-28	1.67549
				ETV6	3.7377e-59	2.37948	LOH12CR1	3.38967e-28	1.67444
				MYOF	4.99442e-59	2.00336	SLC6A1	3.46289e-28	2.1875
				KIF21B	5.2907e-59	2.99027	JMJD8	3.48374e-28	1.63564
				TRIP13	6.62564e-59	3.09645	GPR125	3.87288e-28	1.87037
				LRR1	8.36689e-59	2.62726	PLD2	4.11489e-28	1.74446
				ATAD2	2.34928e-58	2.73693	PDK4	4.69646e-28	2.86015
				TRIM30B	2.55353e-58	3.47371	TMEFF1	4.723e-28	2.19252
				GCSAM	1.25532e-57	4.72131	FAM174B	4.78335e-28	2.70926
				RAB39	4.24645e-57	3.92479	EMC9	4.83153e-28	1.60244
				PNPO	4.48493e-57	2.08037	SATB1	7.74462e-28	1.85416
				ARID3B	6.09744e-57	3.1788	APPBP2	8.39397e-28	1.58415
				KIF4	8.49263e-57	3.13764	GM13403	8.44473e-28	3.26145
				NOC2L	9.5103e-57	1.66726	LURAP1	8.55861e-28	1.56082
				COA4	1.13412e-56	1.76761	NMB	8.90513e-28	1.63424
				RASL2-9	1.26709e-56	3.72814	DAND5	1.0626e-27	1.88227
				HPS1	1.32794e-56	2.06405	DESI2	1.55311e-27	1.5029
				A530064D06RIK	1.34269e-56	3.09982	SS18	1.65777e-27	1.50256
				EPS8	1.4937e-56	1.79596	E130012A19RIK	1.84054e-27	2.50974
				OCEL1	1.62936e-56	1.8804	UBA3	1.90266e-27	1.54255
				DENND4B	1.6663e-56	2.42244	SALL2	2.23506e-27	2.05119
				CYP4F16	1.76257e-56	1.96656	FBRSL1	2.41657e-27	1.709
				SLC35C1	1.92543e-56	2.55945	NAPRT1	2.76335e-27	1.65903
				SLC12A6	2.67248e-56	2.30945	PARD6B	3.3974e-27	2.90592
				EFCAB4A	5.53843e-56	1.52634	RP24-202N2.2	3.72178e-27	3.44602
				DNAJB14	5.6803e-56	1.54726	TC2N	4.45085e-27	2.53636
				BUB1	6.32649e-56	3.06259	ARHGEF16	4.93294e-27	2.17611
				HELLS	6.47193e-56	2.44006	FSTL3	5.33084e-27	1.57379
				GM26520	6.61625e-56	3.49939	REEP6	6.15576e-27	2.42127
				ABCA9	1.01297e-55	2.10679	ZBTB38	6.75824e-27	1.53669
				HIST1H1E	1.46155e-55	2.87135	BRSK2	7.54667e-27	3.08186
				ADORA3	2.06184e-55	2.36498	MSANTD4	1.1116e-26	1.623
				OSBPL11	2.08953e-55	2.17872	FREM2	1.23692e-26	2.08156
				TRIM27	2.55364e-55	1.51382	SIL1	1.29633e-26	1.57637
				COA5	3.63544e-55	1.83282	IQCC	1.38874e-26	1.86509
				STAT4	9.18511e-55	4.43712	PCDHB9	1.94984e-26	2.3362
				CYB5R1	9.34096e-55	1.7373	ITSN1	2.0013e-26	1.54554
				PHLDB3	1.07283e-54	3.15814	CPT1A	2.06403e-26	1.61719
				GBA	1.79853e-54	1.58151	SNX15	2.13524e-26	1.58188
				ARAP3	2.28574e-54	2.56886	YIPF2	2.17831e-26	1.79156
				ALAS1	2.73726e-54	1.59698	HSPA4L	2.65761e-26	1.74274
				BATF2	2.74381e-54	2.77154	PRDM5	3.5206e-26	1.8585
				HTATIP2	3.9198e-54	1.69551	AI480526	3.61678e-26	1.82388
				D930015E06RIK	6.33002e-54	2.89738	SLC39A6	4.04345e-26	1.79605
				TPCN2	7.14109e-54	2.29193	PICK1	4.34628e-26	1.79906
				CLINT1	8.32264e-54	1.80743	CDH6	4.44604e-26	2.26371
				4933433G15RIK	8.69237e-54	3.50986	COL19A1	4.72139e-26	2.55719
				KIF22	1.0673e-53	2.60442	KAZALD1	4.77331e-26	1.78967
				ABCG3	1.55647e-53	3.14424	CASKIN1	5.37396e-26	2.66867
				2310001H17RIK	2.77122e-53	2.35705	ZFP37	6.03151e-26	2.04484
				RBKS	3.08145e-53	2.3214	DMWD	6.5505e-26	1.82369
				GALC	4.69931e-53	2.08142	DOCK1	7.13987e-26	1.62275
				CARD11	6.14136e-53	3.59371	SAMD4	7.80475e-26	1.64098
				SLC39A11	6.47452e-53	2.083	CDK5	7.94742e-26	1.58309
				KIF20B	9.42153e-53	2.58242	GRIFIN	8.9939e-26	2.43031
				CREB3L3	1.02176e-52	3.16815	PPAP2C	9.13889e-26	1.76336
				D6WSU163E	1.05089e-52	2.0049	GM26688	1.15448e-25	2.69311
				PPARG	1.10035e-52	3.04367	4632415L05RIK	1.19303e-25	2.14516
				SH3TC1	1.15026e-52	2.89471	ART4	1.50376e-25	1.87585
				HIVEP3	1.34689e-52	2.15694	2210017G18RIK	1.92928e-25	2.4129
				CXCR4	1.4712e-52	2.19151	CHDH	2.44097e-25	2.24809
				GM23722	1.81644e-52	3.42098	SRR	2.44683e-25	1.7408
				1190002F15RIK	2.06495e-52	2.63552	PLCH1	4.49663e-25	2.43825
				RRM2	2.26997e-52	4.72121	SPATS2L	4.49896e-25	1.66698
				SOWAHC	2.69268e-52	1.98098	GM4221	4.60558e-25	2.74679
				EEF2K	2.7529e-52	2.02497	ALCAM	5.44601e-25	1.75652
				POLR3C	3.01976e-52	1.64315	ALDH1A7	5.54986e-25	2.85423
				BCL3	3.412e-52	2.08509	DUSP4	6.33715e-25	2.01507
				GALNS	4.06949e-52	2.03897	MB21D2	7.64747e-25	2.16131
				4930430E12RIK	4.95577e-52	3.15363	METAP1D	7.75931e-25	1.67759
				B930036N10RIK	7.79013e-52	3.17789	SCRN2	7.80113e-25	1.80603
				ORAI2	9.51218e-52	2.93339	GM9905	1.01322e-24	2.35434
				ZFP120	1.08582e-51	1.8566	PPP2R5B	1.06271e-24	1.64643
				EME1	1.10641e-51	2.66825	ATXN2	1.08268e-24	1.71542
				4930589L23RIK	1.17828e-51	3.48915	WDR83	1.13998e-24	1.695
				ETHE1	1.30309e-51	1.56364	PRR5	1.45638e-24	1.52854
				GM13373	1.33446e-51	3.35037	IL1RAP	1.51834e-24	2.31084
				WDR41	2.58064e-51	1.9037	FBP2	1.79258e-24	2.64071
				C030034L19RIK	3.32696e-51	3.75299	PXMP4	1.82581e-24	1.50777
				EXO1	4.18558e-51	2.63236	HOMER3	1.92165e-24	1.6069
				H2-Q6	7.04358e-51	1.96872	1700084C01RIK	2.0095e-24	2.30118
				CNR2	1.11131e-50	3.34031	SYPL2	2.14507e-24	2.84147
				6330416G13RIK	1.55477e-50	2.00919	GM15640	2.15116e-24	2.40682
				ZBTB7B	1.74169e-50	2.01824	SHC3	2.41464e-24	2.60179
				PQLC2	2.82979e-50	2.01737	THTPA	2.64851e-24	2.08469
				RP24-108I6.2	3.1641e-50	3.13429	PLS1	3.2126e-24	2.83848
				ABCD1	3.45491e-50	1.82081	LRRN2	3.42908e-24	2.53482
				TMEM104	4.48309e-50	2.2769	SMG5	4.249e-24	1.85408
				MYBL2	8.10929e-50	2.85917	ARHGAP32	4.43265e-24	1.61739
				PRSS30	9.81461e-50	3.30951	LCMT1	4.57685e-24	1.51992
				GRAP2	1.02818e-49	2.89942	TOP2B	4.76537e-24	1.50117
				P2RX7	3.54011e-49	1.57142	9330151L19RIK	5.46824e-24	1.94803
				DLGAP5	7.57875e-49	2.57203	MKX	5.65015e-24	2.31144
				CD7	8.19505e-49	11.1872	LIN52	6.27364e-24	1.81992
				GM16372	9.70109e-49	3.31669	CIDEB	6.98677e-24	2.35876
				LACTB	9.83156e-49	1.643	METTL24	7.30376e-24	3.03229
				RMI2	1.36293e-48	2.72627	RAB3D	7.49677e-24	1.64227
				SKA3	1.50603e-48	2.74485	NFS1	7.8065e-24	1.58033
				MROH1	1.64216e-48	2.45453	ZFP608	8.40014e-24	1.98934
				LY6I	1.83987e-48	11.0081	VPS45	9.56524e-24	1.75647
				ADRBK2	1.86883e-48	3.27201	CXCR4	1.36726e-23	1.50438
				MTA3	2.04425e-48	1.695	ZFP664	1.37457e-23	1.50913
				GPR82	2.8172e-48	3.10581	ZZZ3	1.56141e-23	1.68237
				B4GALT6	2.93275e-48	1.73261	ACOT6	1.68369e-23	2.19475
				TBKBP1	3.74451e-48	2.2027	6530411M01RIK	2.21619e-23	2.54812
				ZFP90	5.28835e-48	2.12061	MYRF	2.39324e-23	2.54528
				THBS1	5.81737e-48	3.40543	FAM73A	2.56335e-23	2.14054
				INTS12	8.70885e-48	1.83752	1700008O03RIK	2.59915e-23	2.9626
				OCSTAMP	9.07501e-48	3.46356	LDHD	2.72261e-23	2.49101
				GM10036	9.13816e-48	1.55571	NMT2	3.59341e-23	1.69055
				CDC45	1.08905e-47	2.36688	A330048O09RIK	4.0782e-23	1.99058
				STAT1	2.04064e-47	1.51617	VEGFA	5.93899e-23	1.84431
				GSG2	3.03538e-47	2.7531	GEMIN8	6.14026e-23	1.92336
				PADI2	3.45873e-47	2.67329	PCDHB3	6.87127e-23	2.82844
				CSPRS	4.19852e-47	3.02748	ANKRD50	7.65607e-23	1.59146
				SHMT1	4.26858e-47	2.53457	NR6A1	8.26125e-23	2.44903
				DNMT1	4.61153e-47	1.85996	DNAJC24	9.51929e-23	1.50814
				NEK2	5.5499e-47	2.6561	GM16233	9.83204e-23	2.77031
				XLR4A	7.71304e-47	3.44895	DNAIC2	1.0124e-22	2.0668
				CCR7	8.4459e-47	16.5154	NCKAP5	1.10232e-22	2.21742
				SMC2	9.49527e-47	1.92084	ZFP523	1.18591e-22	1.68998
				SERPINB10	2.80941e-46	5.26725	TMEM98	1.39487e-22	1.72134
				SLFN5	4.95283e-46	1.89071	CBX4	1.45426e-22	1.76315
				CXCL9	5.90082e-46	6.74234	HOOK3	2.12954e-22	1.54546
				SPAG5	6.97687e-46	2.75845	RABGAP1	2.50574e-22	1.65417
				CKAP2	7.9919e-46	2.84797	VPS41	2.59235e-22	1.61016
				ZFP622	1.01929e-45	1.50634	PHKA1	2.6622e-22	2.21323
				ARHGAP30	1.03865e-45	3.13462	LRRC75B	2.84751e-22	2.78648
				MSRB1	1.14349e-45	1.69882	BDH1	2.86432e-22	2.16662
				ANKLE1	1.17205e-45	2.63937	GID4	2.89203e-22	1.64471
				TROAP	1.8993e-45	2.4209	NETO2	3.17036e-22	2.84613
				RBL1	1.91713e-45	2.37056	FMN2	3.67557e-22	2.1364
				XYLT2	2.87757e-45	1.76341	HIST3H2BA	5.03464e-22	1.65298
				TCOF1	9.58071e-45	1.65029	CSGALNACT1	5.15517e-22	1.78318
				DTX3L	1.20144e-44	1.99573	TMEM101	5.17413e-22	1.54648
				ILDR1	1.21439e-44	3.47809	FGF12	5.99227e-22	2.33113
				TNIP2	1.22047e-44	1.87323	2610307P16RIK	6.68906e-22	2.27786
				GM13248	1.5671e-44	3.10809	GPR137	8.30071e-22	1.55954
				TMEM170B	1.62751e-44	2.18869	CWH43	9.73463e-22	3.06623
				MYO7A	1.81319e-44	2.31711	SLC13A5	1.03649e-21	2.25813
				MOB3A	2.10347e-44	1.85585	PROM2	1.06776e-21	2.43916
				HDAC9	4.58435e-44	3.05289	FAM115A	1.08716e-21	1.50775
				CD226	5.44895e-44	3.16768	TMEM161A	1.26739e-21	1.50185
				PEAK1OS	5.8575e-44	2.88903	POLD2	1.31757e-21	1.51293
				ERMAP	6.4741e-44	3.37091	RUNDC3A	1.37466e-21	1.51632
				DRAM1	7.61693e-44	2.63616	LMX1B	1.51994e-21	2.45125
				TMEM52	7.73874e-44	2.81879	ZSCAN21	1.60265e-21	1.67391
				HIST1H2AE	8.95536e-44	3.02868	GM14662	1.91949e-21	2.4326
				GM16998	9.1342e-44	3.24831	CCDC60	2.06003e-21	2.29804
				GM20429	1.06198e-43	3.61781	ADAM17	2.21266e-21	1.63122
				MYL2	1.91463e-43	3.03729	1110038B12RIK	2.23287e-21	1.7102
				ATP6V0A1	2.05027e-43	1.75101	MZT2	2.60645e-21	1.51716
				ARID5A	2.20263e-43	1.56517	CLCN6	2.65184e-21	1.87737
				SNRNP25	3.3672e-43	1.5228	ANGPTL6	3.33363e-21	2.04501
				BRIP1	3.73673e-43	2.63235	TMSB15B1	3.72622e-21	2.38076
				5830432E09RIK	3.75392e-43	3.24725	KATNAL2	3.76936e-21	2.34984
				SLC4A7	4.36718e-43	1.99377	GGACT	4.08516e-21	1.57815
				GOLM1	1.01285e-42	2.05395	PCDHA10	4.16225e-21	2.14508
				CHN2	1.18e-42	1.95073	LRRC16A	5.39476e-21	1.69234
				DENND1A	1.20378e-42	2.10776	SLC37A4	5.54265e-21	1.80304
				ASB10	1.81912e-42	2.67089	TIMM8A1	6.31455e-21	1.91813
				GPR146	1.84788e-42	1.50962	ZMAT1	6.66633e-21	1.79536
				CCL22	3.07214e-42	15.5277	SLC39A1	7.3353e-21	1.50719
				TBC1D4	4.04613e-42	2.42299	HDDC2	7.64806e-21	1.55917
				RFC5	4.32562e-42	1.56273	SSPN	8.76442e-21	1.50704
				TCF19	6.37961e-42	2.33977	4732491K20RIK	8.82795e-21	2.23486
				MAP3K1	7.07974e-42	1.566	TLR3	8.85717e-21	1.75714
				GOT1	7.08765e-42	1.64561	POP4	8.92002e-21	1.59684
				FBXO5	9.09286e-42	2.34074	A930004D18RIK	9.33164e-21	2.11546
				ATF6	9.21221e-42	1.90341	CCPG1OS	1.07599e-20	1.73492
				SASS6	1.49511e-41	2.19758	INSL6	1.08315e-20	2.29689
				LSR	1.53118e-41	1.52959	IKZF2	1.08582e-20	1.78569
				HEATR5A	1.63247e-41	2.18053	THEM4	1.1615e-20	1.53813
				R3HCC1L	1.71521e-41	1.88776	KCNN2	1.32041e-20	2.46191
				SEPP1	1.85993e-41	1.94873	RP23-392G15.1	1.49156e-20	2.27266
				DENND2C	2.15246e-41	2.7935	PANX1	1.57841e-20	2.10946
				PKMYT1	2.31949e-41	1.92289	2020-09-10	1.87026e-20	1.54321
				NKG7	3.64941e-41	10.5821	ITGA2	1.87743e-20	2.48398
				PRKCH	4.86326e-41	1.74022	A330041J22RIK	1.8809e-20	2.46842
				SLC7A13	5.03879e-41	3.36284	CLCA2	1.91183e-20	3.07386
				GM21807	5.105e-41	3.15619	AQP5	2.8952e-20	2.54881
				SLC13A3	5.36946e-41	3.18598	GM26808	2.94724e-20	2.45047
				PSD4	5.41694e-41	2.1254	LEKR1	3.29192e-20	1.8808
				GM17056	7.78308e-41	2.358	ZCWPW1	3.75223e-20	2.08489
				TYMS	9.63828e-41	2.1133	ZFP30	3.76532e-20	1.82362
				NAGA	1.22728e-40	1.63625	GM11992	4.07902e-20	2.26855
				ARMC7	1.60706e-40	2.17298	PLXNB1	4.11684e-20	1.67264
				CD28	1.78996e-40	5.15108	ETFDH	4.32151e-20	1.535
				TPP2	2.4149e-40	1.56389	AMMECR1	4.7721e-20	2.01183
				SFT2D2	2.52927e-40	1.63445	PCDHB4	4.9459e-20	2.48476
				RNF141	2.59248e-40	1.63144	DNAJC6	4.98789e-20	2.35296
				SERPINA3G	3.15427e-40	5.68724	FAM168A	5.50052e-20	1.5295
				DGKD	4.61245e-40	1.88295	2810410L24RIK	5.8818e-20	2.47767
				SLC16A7	7.16473e-40	2.09799	NAT8L	6.25136e-20	2.44023
				HP	7.67449e-40	2.26768	MAP3K4	6.64967e-20	1.87208
				PLAGL2	1.02549e-39	2.11108	BMP1	7.1027e-20	1.53653
				HRH2	1.28112e-39	2.72306	LPHN2	7.65695e-20	1.68713
				DCP2	1.30448e-39	1.72656	RIMKLB	7.76635e-20	1.57299
				ECT2	1.48225e-39	2.74973	PORCN	1.2156e-19	1.64114
				NLRP1B	1.92022e-39	2.41426	DESI1	1.26129e-19	1.5645
				CCNE2	2.22317e-39	3.04596	TMEM139	1.26248e-19	2.37442
				CHTF18	2.71854e-39	2.43089	2610203C20RIK	1.36027e-19	1.79889
				PALD1	2.99579e-39	1.59066	TEX2	1.39641e-19	1.68907
				MTR	3.28087e-39	2.56488	LLGL1	1.59677e-19	1.64978
				REEP4	3.41838e-39	1.63822	DLG5	1.77141e-19	2.10083
				TMEM156	4.1825e-39	3.00202	SPIDR	1.85441e-19	2.27712
				FAM117B	6.12382e-39	1.89368	MMAB	2.45105e-19	1.81148
				2810408I11RIK	9.96959e-39	2.25602	RAB39B	3.53131e-19	2.42833
				NFATC1	2.01366e-38	2.02023	CTF1	3.69111e-19	1.80673
				JARID2	2.2149e-38	2.01654	PDZD8	3.73716e-19	1.64355
				DEPDC1A	2.30289e-38	2.48732	1110054M08RIK	3.84609e-19	1.57172
				PNP2	2.95893e-38	2.72047	CML1	4.45167e-19	1.6476
				A230046K03RIK	4.23289e-38	1.63541	BCL9	4.62363e-19	1.62313
				GBP8	4.28438e-38	2.82408	LRP2	4.81394e-19	2.17188
				TMEM71	4.31435e-38	2.12013	IQSEC1	5.30241e-19	1.54318
				CCDC69	4.34024e-38	2.28577	TRP63	5.32689e-19	2.36488
				SGOL2	4.59021e-38	2.33739	IRAK1BP1	5.98142e-19	1.53305
				GM7536	4.76117e-38	1.50963	SLC35E3	6.79212e-19	2.11849
				NFKB2	5.26388e-38	1.5899	1700003F12RIK	6.87433e-19	2.17495
				PDCD1LG2	7.44779e-38	2.98769	GM12976	7.16689e-19	2.68033
				PRIMPOL	7.5909e-38	2.66142	ZC3H7B	7.32972e-19	1.63748
				CCL17	1.07766e-37	29.675	RDH11	7.59624e-19	1.64251
				ATP6V0D2	1.08097e-37	3.52039	PRKD1	7.64848e-19	2.15244
				CDC20	1.1501e-37	2.84829	SYP	8.32354e-19	1.86826
				C1RL	1.38571e-37	2.25175	KCNE1L	9.02855e-19	2.04976
				BTBD19	1.5924e-37	2.28733	TMEM53	9.34342e-19	1.57442
				TRIM65	1.65692e-37	2.2632	ZHX2	9.56813e-19	1.86618
				VCAM1	1.67404e-37	2.72486	RNF208	9.57989e-19	2.36667
				HTR7	1.80859e-37	2.60036	A930001A20RIK	9.87885e-19	2.14241
				SNX24	2.10511e-37	1.64779	STX18	1.00566e-18	1.53163
				CTSG	2.38397e-37	29.6438	GDPD1	1.00985e-18	1.71875
				ASPM	2.38786e-37	2.714	GCAT	1.08477e-18	1.65956
				FMNL3	2.71263e-37	1.72627	ZFP809	1.17774e-18	1.88599
				HAUS4	3.41181e-37	1.62502	RASSF8	1.19112e-18	1.86232
				ACCS	3.54467e-37	2.11907	GGNBP1	1.23577e-18	1.84776
				H2AFX	3.74514e-37	2.25102	LMF1	1.26818e-18	1.52614
				GM11709	3.81579e-37	3.01931	TELO2	1.29899e-18	1.54675
				PDGFB	4.39177e-37	1.77531	RP23-13C17.6	1.36956e-18	1.95344
				TLR6	4.72499e-37	2.92306	ANKRD9	1.40697e-18	1.70398
				MAD2L1	6.80046e-37	1.74878	SNX27	1.5685e-18	1.51374
				FOXM1	7.03963e-37	2.2274	FANCE	1.6939e-18	1.5763
				A930006K02RIK	1.53303e-36	2.6608	KSR1	1.73409e-18	1.84049
				TYK2	2.04408e-36	2.24386	A530095I07RIK	1.78577e-18	2.89785
				ISY1	2.44738e-36	1.59883	TRIM35	1.78877e-18	1.52036
				CENPU	2.79826e-36	2.21464	CLPB	1.94435e-18	1.61751
				SLC36A3OS	4.699e-36	2.65218	JMY	3.06844e-18	1.81391
				ZMIZ2	5.58993e-36	1.56817	EVI5L	3.349e-18	1.9041
				B3GNT7	5.87253e-36	2.45051	CADPS2	4.87327e-18	2.41817
				CHAF1A	7.07943e-36	2.02215	ANKRD28	6.14069e-18	2.47104
				TBC1D5	8.51295e-36	2.06431	PCSK4	6.77743e-18	2.27602
				PIP5K1C	1.02433e-35	1.82714	NCAN	7.27212e-18	2.19412
				2310035C23RIK	1.75666e-35	1.68229	IQGAP2	7.98598e-18	1.69363
				RPUSD4	1.94576e-35	1.6921	UGT1A6A	8.04757e-18	2.29311
				MTSS1	2.17679e-35	1.76701	TRIM62	8.12872e-18	2.10725
				RP24-554B1.5	2.44269e-35	2.50772	NTNG1	9.23342e-18	1.67189
				AGO4	3.79441e-35	2.75038	DOK6	9.4992e-18	2.41916
				NLRC5	4.24335e-35	2.24603	1700019D03RIK	1.01333e-17	2.52129
				CDC25C	4.39965e-35	2.35053	TTC18	1.09039e-17	1.99977
				ADRB1	4.65841e-35	2.86958	ENOX1	1.09973e-17	2.81676
				DNAJC13	6.27893e-35	1.69464	UBA7	1.21318e-17	1.53681
				RAD54L	7.07752e-35	1.96438	ZCCHC3	1.25411e-17	1.64767
				PEAK1	7.12425e-35	1.5933	NT5C3B	1.49064e-17	1.56271
				MDGA1	9.07335e-35	2.79587	FBF1	1.66893e-17	1.84698
				NEURL2	1.09011e-34	1.95378	HIBCH	1.69633e-17	1.55049
				SAPCD2	1.10161e-34	2.31505	AGBL3	1.80034e-17	1.7258
				CABLES1	1.19455e-34	2.22015	ADAMTS18	1.84033e-17	2.23149
				TTK	1.44415e-34	2.40813	ZDHHC1	2.37519e-17	1.5952
				RBM38	1.54928e-34	1.89897	KCNIP3	2.46609e-17	1.57667
				ATMIN	1.76812e-34	1.94293	CEP19	2.47589e-17	1.53447
				CCNE1	1.84278e-34	2.89951	2810408A11RIK	2.5346e-17	2.31357
				ARHGAP27	1.8709e-34	2.07876	RP24-467O4.1	2.66884e-17	1.63335
				DISC1	3.05245e-34	1.9377	MPDZ	3.28783e-17	1.50959
				VAC14	4.0044e-34	1.70354	IFT74	3.55648e-17	1.50678
				SLC12A9	4.02157e-34	1.5024	CPA2	4.13278e-17	2.4148
				A530099J19RIK	4.60016e-34	2.51268	MAP4K5	4.75549e-17	1.73455
				ANKFY1	4.6109e-34	1.56199	BC065397	5.56135e-17	1.76054
				BCL2L14	4.74028e-34	4.73506	A930005H10RIK	6.73858e-17	1.55346
				TRIM12C	5.4424e-34	1.65005	HCN2	7.11393e-17	1.6374
				FAM60A	5.87441e-34	1.90105	FAM195A	8.35964e-17	1.52755
				SPIB	6.44963e-34	3.8425	HAUS2	8.96526e-17	1.75243
				WDR81	6.45925e-34	2.13322	RALGPS1	1.12997e-16	1.69935
				GM12708	7.36639e-34	2.66049	ARMCX6	1.34353e-16	1.70412
				AIM1	1.42287e-33	2.59826	BBS2	1.35027e-16	1.77907
				SPDL1	1.43089e-33	2.20033	SRPK3	1.4128e-16	1.99873
				DTL	1.50591e-33	2.19272	MRGPRF	1.42183e-16	1.72815
				USP15	1.60623e-33	1.56981	GM15663	1.42508e-16	1.96596
				ERO1LB	2.14419e-33	2.27822	FOXO4	1.67293e-16	1.8109
				PPP6R1	2.76627e-33	2.05706	INPP1	1.87622e-16	1.57793
				ST3GAL1	2.89103e-33	2.04938	FUBP3	1.92735e-16	1.52856
				CDCA7	5.6815e-33	1.89822	NOL4L	2.01847e-16	1.76387
				NDST2	1.07486e-32	1.92049	TROVE2	2.22512e-16	1.50331
				ERCC6L	1.16022e-32	2.1202	XRCC4	2.68204e-16	1.56847
				RFC4	1.2281e-32	1.52364	HAUS7	2.69724e-16	1.53411
				UGCG	1.49749e-32	1.94998	PCDH11X	2.7411e-16	3.01216
				OIP5	1.55571e-32	2.11918	TMEM117	2.83234e-16	2.16609
				GEMIN6	1.62891e-32	1.63178	ACACB	3.08036e-16	1.91402
				ADAM19	1.66189e-32	2.071	AI848285	3.86138e-16	1.91222
				GLRP1	1.66633e-32	2.50039	ABHD1	3.90879e-16	1.9052
				VCPKMT	1.84557e-32	1.56939	HSD17B14	3.93543e-16	2.27805
				ZDHHC14	1.89832e-32	1.89529	APPL2	4.17714e-16	1.52156
				HIST4H4	1.95721e-32	3.06463	F8A	4.43657e-16	1.66788
				NUFIP1	2.76965e-32	1.56909	OPLAH	5.48597e-16	1.85693
				CENPI	2.90014e-32	2.14989	PCDH8	5.63404e-16	2.51333
				BRCA1	3.16863e-32	2.19852	PDHX	6.0007e-16	1.5714
				3110043O21RIK	3.1785e-32	1.89917	ENKD1	6.21476e-16	1.93845
				1700023H06RIK	3.65224e-32	2.64437	WASF1	6.97084e-16	2.06523
				STARD8	5.66409e-32	1.5829	RAB26OS	7.18792e-16	1.771
				RREB1	6.11957e-32	1.7885	GM27477	7.95227e-16	1.51453
				CTDP1	6.65927e-32	1.82656	ZSWIM5	8.71508e-16	2.21872
				PDXK	7.01212e-32	1.68694	RP24-144C10.1	8.96916e-16	2.23668
				EZH2	9.32355e-32	1.56126	C2CD4D	1.22069e-15	1.85038
				HIST1H1D	1.00749e-31	2.32351	MYEF2	1.26777e-15	1.55351
				MID1	1.08374e-31	1.88068	GM26519	1.29104e-15	2.48059
				RRM1	1.29612e-31	1.51135	MEN1	1.49691e-15	1.5645
				RFFL	1.69565e-31	2.21312	GM5914	1.53527e-15	1.75937
				RAET1D	1.96536e-31	2.91492	GM14418	1.60586e-15	1.89892
				NOD2	2.12447e-31	2.44043	RMDN3	1.62102e-15	1.50961
				GM9530	2.34338e-31	2.65395	B3GAT1	1.6679e-15	2.58171
				RAB29	2.49117e-31	1.60755	DNAH7B	1.75509e-15	2.37012
				ARHGEF3	2.89135e-31	1.60663	4931429P17RIK	2.00506e-15	1.99122
				TNFAIP2	3.10086e-31	2.13434	NCDN	2.03421e-15	1.50295
				POT1B	3.33284e-31	1.98308	LPAR4	2.18957e-15	1.80787
				MAST3	3.38987e-31	1.95654	CXCL10	2.4626e-15	1.59062
				CYP2R1	4.09221e-31	2.44882	TBC1D19	2.53998e-15	1.53113
				E230013L22RIK	4.59456e-31	2.52807	FBXW17	2.76695e-15	1.60613
				ATP1A3	5.10023e-31	2.52957	SPDYA	3.46305e-15	2.27308
				PSME2B	5.56331e-31	1.5753	TAF1	3.58546e-15	1.59696
				HERC4	8.17958e-31	1.70724	S100A2	3.75307e-15	1.77663
				IQGAP3	9.0823e-31	2.16208	ERF	4.00904e-15	1.50398
				PLK4	9.16285e-31	1.86539	LRP11	4.66817e-15	2.00196
				MLXIP	9.68241e-31	2.11452	PARD3	5.21465e-15	1.67168
				ASCL2	9.73793e-31	2.60761	MMACHC	5.60373e-15	1.81505
				DENND2D	1.01962e-30	2.57698	RNF157	6.13308e-15	2.00327
				IGSF9	1.15806e-30	2.39542	CEP97	6.14685e-15	1.86359
				GM20513	1.37922e-30	2.65635	BMI1	7.2401e-15	1.54945
				STAMBPL1	1.45954e-30	2.19444	AGPAT1	7.32571e-15	1.66722
				SFMBT1	1.53309e-30	1.80507	ISOC2A	7.50078e-15	1.60335
				CACNA1S	1.58479e-30	3.28662	GM10125	7.55449e-15	1.71464
				CD209B	1.92319e-30	3.27115	AEBP2	7.8488e-15	1.59375
				ZCCHC6	2.02654e-30	1.53268	TACC2	7.93132e-15	1.54879
				IL1RN	2.79472e-30	1.62324	APEX1	8.81646e-15	1.51745
				MYCL	3.30522e-30	2.47004	RCC2	9.09066e-15	1.57172
				PFKFB3	3.81061e-30	1.8333	FLYWCH2	9.6416e-15	1.59894
				NLRC3	3.87104e-30	2.29218	GM9925	9.76862e-15	1.97557
				HEMGN	4.09555e-30	8.80267	STIM2	1.03604e-14	1.56672
				MXD1	5.07114e-30	1.84128	GM12052	1.04132e-14	2.27874
				5830444B04RIK	7.33073e-30	2.56747	BRI3BP	1.11073e-14	1.5028
				ENOX2	9.57236e-30	1.84379	KLK13	1.7298e-14	2.77892
				MANBA	1.64072e-29	1.86722	TNC	1.74241e-14	1.81721
				SIAH2	1.66295e-29	1.50995	CKM	1.78383e-14	2.33859
				TJP3	2.00301e-29	2.60025	TMEM27	1.79246e-14	1.86886
				ZSWIM6	2.2826e-29	1.67809	PPP1R16A	1.93407e-14	1.59818
				DDX60	3.34467e-29	1.83946	KIRREL	1.95098e-14	1.82231
				SNAP29	5.85008e-29	1.68102	RP23-222K15.31	2.0129e-14	1.88358
				GDAP10	5.87654e-29	2.12109	SLMO1	2.02966e-14	1.85332
				ACAP1	8.4008e-29	2.54036	GM12580	2.03343e-14	2.2988
				PLEKHM3	9.02249e-29	2.0792	WWOX	2.27165e-14	1.56129
				H2-T24	9.89723e-29	2.45298	GRK4	2.37343e-14	1.80393
				GP9	1.37369e-28	2.17796	KLHDC1	2.47271e-14	1.66503
				LRCH1	1.44102e-28	1.61031	MYOM3	2.47284e-14	1.70588
				HIVEP2	1.47781e-28	1.58179	VWA8	2.65712e-14	1.69679
				ZFP658	1.47786e-28	2.67514	PTPN4	2.93642e-14	1.83044
				RNF169	1.57416e-28	1.95179	TCAIM	3.04803e-14	1.77314
				ETV5	1.58574e-28	1.70478	A430035B10RIK	3.41824e-14	1.76459
				IL18RAP	1.69206e-28	2.66617	PCCB	3.74954e-14	1.5181
				USP3	1.82384e-28	1.53336	MUS81	4.07796e-14	1.55089
				CLDN13	1.86087e-28	5.45946	ARHGAP35	4.23324e-14	1.6114
				GM26667	1.99929e-28	2.62794	ZFPM2	4.26538e-14	2.0161
				ARRDC3	2.15026e-28	1.7327	IFT122	4.50151e-14	1.53811
				KLRB1F	2.40329e-28	2.80116	A930018P22RIK	4.57677e-14	2.08523
				GPR114	2.49536e-28	2.26109	GM8098	4.70661e-14	2.22276
				LPGAT1	2.54636e-28	1.6397	TTC23	4.85634e-14	1.63527
				MARCO	3.68874e-28	3.57631	FAIM2	5.22463e-14	1.63393
				ME2	4.28665e-28	1.5688	LHPP	5.29505e-14	1.65822
				NCCRP1	5.81727e-28	2.93072	MAMLD1	5.33409e-14	2.07467
				SYNJ2	6.15934e-28	2.39143	MAP9	5.72108e-14	2.08125
				2610318N02RIK	7.96202e-28	2.10186	DOS	6.41447e-14	1.65991
				FCHSD2	8.8579e-28	1.67097	GM15728	7.803e-14	2.044
				MYADM	9.66225e-28	1.69375	MIR1897	8.14367e-14	2.00504
				ZDHHC9	1.11576e-27	1.72203	OXTR	8.77252e-14	2.70846
				FAM49A	1.17853e-27	1.72621	SAMD5	9.99253e-14	2.13947
				TNNT1	1.48047e-27	2.06125	KIF5C	1.1356e-13	1.77978
				DNPH1	1.82016e-27	1.75968	CSTF2T	1.23388e-13	1.53463
				ULBP1	2.59945e-27	2.22991	FAM83F	1.26486e-13	1.7093
				CHEK2	3.10219e-27	1.71996	FGF11	1.35822e-13	1.81776
				ELANE	3.76297e-27	25.4151	PLEKHA5	1.64138e-13	2.09526
				VPS33A	3.77782e-27	1.50203	PCDHB12	1.72221e-13	2.06578
				RAB27A	4.00972e-27	2.16797	KIFC2	1.78049e-13	2.31742
				HS1BP3	6.05459e-27	1.94976	SWSAP1	1.85481e-13	1.70639
				TMPRSS4	7.48517e-27	1.93091	UNC79	1.94542e-13	2.56855
				LDLRAP1	7.7957e-27	1.52805	MTBP	2.04325e-13	1.83282
				CCDC93	7.97987e-27	1.94597	M5C1000I18RIK	2.25734e-13	1.89071
				SLC36A1	9.57368e-27	2.00053	KIF7	2.32799e-13	1.86416
				TARM1	1.08451e-26	2.47565	LZIC	2.32938e-13	1.55089
				PHF11C	1.18612e-26	2.57699	HUS1	2.75303e-13	1.76846
				NFE2	1.36815e-26	2.62004	GSTZ1	3.42566e-13	1.5864
				KPNA2	1.42781e-26	1.96359	RNF24	3.8083e-13	1.72871
				TLR11	1.56918e-26	2.02523	ZFP775	3.84498e-13	1.74236
				BC094916	1.92098e-26	2.35695	SETBP1	4.03684e-13	1.65378
				ZFP263	1.95696e-26	1.51461	ACY1	4.41776e-13	1.69313
				WDHD1	1.98605e-26	2.10679	ACTR6	4.86291e-13	1.51665
				GM6133	2.02729e-26	1.63896	CATSPER3	6.2667e-13	2.01138
				TLR8	2.21208e-26	2.53599	COBL	6.7477e-13	1.84981
				CBL	2.33806e-26	1.68827	RHBDF2	6.75301e-13	1.74305
				NBEAL2	2.63741e-26	2.08277	WDR34	7.15325e-13	1.73139
				PHKA2	2.77365e-26	1.67933	SNX22	7.77559e-13	1.71934
				TLCD2	2.9845e-26	1.63114	FAM135A	9.94712e-13	1.69045
				CCRN4L	2.99363e-26	2.33931	GM12224	1.09294e-12	2.16738
				CD3E	3.57196e-26	6.55808	VANGL2	1.13113e-12	1.62581
				MARVELD2	3.79311e-26	2.72733	TANC2	1.31485e-12	1.59728
				LSM11	4.0891e-26	1.80332	2310002F09RIK	1.3389e-12	2.51043
				CXCL3	4.34605e-26	2.93015	TLE3	1.34015e-12	1.65517
				NSL1	5.06e-26	1.99278	HIST2H2BE	1.37315e-12	1.61892
				CENPN	5.30065e-26	1.88158	POU3F4	1.38149e-12	1.78152
				MOGS	7.11605e-26	1.76411	3110045C21RIK	1.4187e-12	2.15105
				DYRK2	7.2837e-26	2.35199	NUMB	1.44229e-12	1.539
				ATP7A	8.86254e-26	1.79518	FAN1	1.60119e-12	1.84878
				4833407H14RIK	9.17987e-26	2.42931	SLC25A14	1.6186e-12	1.56767
				6030468B19RIK	1.00669e-25	1.95392	PTBP2	1.71278e-12	1.65822
				RMI1	1.15446e-25	1.55595	GM11650	1.74165e-12	1.70587
				CD274	1.3923e-25	2.15595	CARNS1	1.77814e-12	1.58512
				DNAJB13	1.44082e-25	2.27358	PAPLN	1.93937e-12	1.88953
				KCNE3	1.58905e-25	2.33123	GM17597	2.43477e-12	1.91613
				TSPO2	1.63906e-25	3.89413	9630013D21RIK	2.82437e-12	1.93766
				PRR5L	1.66488e-25	1.74494	EFR3B	3.07669e-12	1.62874
				MITF	1.9795e-25	1.69733	MGME1	3.09398e-12	1.52103
				CENPW	3.57147e-25	1.7215	WDR13	3.93972e-12	1.54987
				DDX43	4.49245e-25	2.01091	TRPT1	4.31404e-12	1.79579
				BC021614	5.93016e-25	1.85505	SETD7	4.34765e-12	1.66198
				PDZK1IP1	6.5156e-25	3.60679	GM26543	4.57647e-12	1.9632
				HPS4	6.65014e-25	1.59658	9130213A22RIK	4.96469e-12	2.07986
				TRIM41	6.88949e-25	1.54218	RN7SK	5.4908e-12	2.01628
				B3GALT4	8.22037e-25	1.71468	DNAJC12	5.58113e-12	1.62091
				GM20707	1.03769e-24	2.56533	HAPLN4	5.90184e-12	1.90449
				3300005D01RIK	1.118e-24	2.01221	2020-03-09	6.26663e-12	2.01652
				GM13205	1.39621e-24	2.39339	KIF13A	6.69119e-12	1.61003
				PALB2	2.12919e-24	2.15958	EGFEM1	7.11781e-12	2.53867
				4930579G24RIK	2.28697e-24	1.63496	LRRC73	7.40291e-12	1.86273
				CLEC4G	2.31004e-24	2.24213	BPIFB5	7.57749e-12	1.89794
				ISG20	3.19996e-24	2.44432	ALDH1L1	8.76979e-12	1.6077
				WDR3	3.26253e-24	1.56006	I830012O16RIK	9.05575e-12	1.53799
				CYP8B1	3.45282e-24	1.8604	A230107N01RIK	9.80783e-12	2.11632
				CDK2	3.46218e-24	1.52624	GM17251	1.06051e-11	1.72302
				KLRA17	4.3662e-24	3.39162	4930430F08RIK	1.08323e-11	1.63064
				SMAD7	4.56283e-24	1.52235	RGL3	1.12566e-11	1.59603
				DHX34	4.80116e-24	1.80448	PXDN	1.14289e-11	1.55794
				SLC13A2	5.1829e-24	2.18608	USP22	1.14561e-11	1.59046
				ZFP691	5.36019e-24	2.55387	ZBTB5	1.15393e-11	1.92163
				BC055324	5.55658e-24	2.12826	GM7854	1.17905e-11	1.91711
				GM20605	5.7567e-24	2.35249	NUPR1L	1.19943e-11	2.0219
				HIST1H4I	6.55548e-24	1.64325	HS2ST1	1.2365e-11	1.55003
				GPATCH3	7.18697e-24	1.85599	SCN8A	1.23665e-11	2.09901
				TRAF5	7.36196e-24	1.61712	LPAR3	1.26679e-11	1.63134
				AP5B1	8.30282e-24	2.1124	CIB2	1.61816e-11	1.50739
				IL1R2	8.32788e-24	2.77355	GM26890	1.63619e-11	1.67622
				CLEC4A4	1.12408e-23	2.00285	KCNA2	1.66949e-11	2.07772
				C330027C09RIK	1.20471e-23	2.04658	MCCC1	1.70598e-11	1.62775
				CAPN3	1.52303e-23	2.04142	BLOC1S5	1.713e-11	1.50016
				GNG10	1.56307e-23	1.70705	BC016548	1.73339e-11	1.67739
				PDCD1	1.66783e-23	2.28413	BRICD5	1.81783e-11	1.9434
				STIL	1.93219e-23	1.80768	TLL2	2.08538e-11	1.73554
				CD2	2.13953e-23	4.92689	HIST1H4J	2.32909e-11	2.03992
				BCL2L11	2.17786e-23	1.54589	PIWIL1	2.37832e-11	2.09232
				RB1	2.57273e-23	1.53872	GDF11	2.59583e-11	1.54014
				TRBC2	2.76141e-23	12.6538	ZFP870	2.65157e-11	1.63584
				ICOS	2.89383e-23	3.46941	ARHGEF28	3.22926e-11	1.75246
				FFAR2	3.27338e-23	3.04322	NTN3	3.30232e-11	1.8949
				SKP2	3.28291e-23	1.81297	ZFP612	3.82258e-11	2.12638
				GM16096	3.84281e-23	2.06492	VPS25	3.90873e-11	1.7266
				ITGA9	3.96266e-23	2.07612	KISS1R	4.05603e-11	1.93013
				CKS1B	4.1111e-23	1.79447	COL25A1	4.32748e-11	1.61225
				TRERF1	4.34849e-23	1.57346	GM19426	4.50502e-11	1.64698
				SLC45A4	5.42633e-23	1.91812	PEG10	4.60803e-11	1.7176
				EIF2AK2	5.45482e-23	1.5726	HIF3A	4.76012e-11	1.80029
				M1AP	5.52684e-23	2.09874	ZBTB12	4.91551e-11	1.69499
				CIT	6.46783e-23	1.87401	GM13483	4.95938e-11	2.17717
				KIF14	7.15597e-23	1.75472	LY6G6F	5.1201e-11	1.74646
				BBC3	7.36195e-23	1.79755	TACO1OS	5.26089e-11	2.00109
				CD3G	7.50645e-23	11.3763	SSH1	5.53358e-11	1.57265
				SLC9A7	8.90114e-23	2.37341	SHROOM3	6.28309e-11	1.54881
				PML	9.85877e-23	1.62514	WIZ	6.35914e-11	1.64506
				PRR11	1.15113e-22	2.14001	GM27403	6.36619e-11	1.79831
				TRIM10	1.15168e-22	3.73409	GM9869	6.48371e-11	2.01891
				4931440P22RIK	1.16443e-22	1.73557	A230060F14RIK	6.54094e-11	1.91303
				LDLRAD4	1.16921e-22	1.74789	DANCR	6.60271e-11	1.50786
				NR0B2	1.4783e-22	1.73525	ZFP553	7.10082e-11	1.62516
				IDUA	1.52456e-22	1.64658	COL11A2	8.27086e-11	2.09815
				AFP	1.68228e-22	1.98071	VASH1	8.37294e-11	2.01855
				ENO3	1.73364e-22	2.39979	MORN1	8.46813e-11	1.68772
				RPS18-PS3	2.03204e-22	1.6525	CRYZ	9.23197e-11	1.5838
				GM26542	2.03286e-22	2.48257	SLC46A1	9.90504e-11	1.57933
				GM13657	2.33019e-22	2.33571	MANEA	1.08979e-10	1.60723
				GM8817	2.33317e-22	2.17532	SDK2	1.16433e-10	1.52888
				CXCR6	2.51552e-22	8.83062	GM14419	1.16692e-10	1.68153
				APOL7C	2.88099e-22	4.53791	TMEM88B	1.17535e-10	2.09038
				N4BP1	2.89744e-22	1.54913	CD276	1.1985e-10	2.12353
				GM26857	2.92837e-22	2.34488	RIF1	1.50577e-10	1.50819
				9930111J21RIK1	3.49187e-22	2.25791	GM21967	1.60424e-10	1.6571
				CENPL	3.97123e-22	1.65742	ALKBH8	1.68702e-10	1.64262
				IL12B	4.0118e-22	7.17869	AQP3	1.7192e-10	1.96554
				H2-EB2	4.51061e-22	2.40021	BBS4	1.83445e-10	1.60752
				HAUS3	4.9744e-22	1.66595	PLCD4	1.88673e-10	1.61458
				CD300C	5.36456e-22	3.13059	2900076A07RIK	1.89629e-10	1.55465
				GM11707	7.21884e-22	2.09551	PERM1	2.09668e-10	1.68617
				ATXN3	8.80134e-22	1.64078	PIK3C2B	2.42818e-10	1.83294
				A930018M24RIK	9.09473e-22	2.36202	4930506C21RIK	2.57968e-10	2.04347
				NLRP1A	9.49637e-22	1.97285	PBX4	2.59021e-10	1.97639
				CTSW	1.13285e-21	5.707	PM20D1	2.83375e-10	1.85321
				ADAR	1.2014e-21	1.6523	STBD1	2.98386e-10	1.57373
				GM4944	1.49322e-21	1.77658	POC1A	3.01583e-10	2.07508
[truncated: 470 more rows]

## Sheet: markers expression
Gene	Mean (SGC)	Mean (mac)	mean (IG)	% cells (SGC)	% of cell (mac)	% of cell (IG)
Fabp7	11.52	3.91	9.97	93.9	49.76	90.16
Plp1	12.07	3.01	11.23	99.81	39.3	99.82
Cadh19	4.82	0.87	4.41	57.7	12.01	58.65
CD68	0.27	8.2	7.37	3.61	87.33	85.79
AIF1	0.22	8.34	7.75	2.87	86.62	89.07
Cx3cr1	0.19	5.77	6.02	2.52	65.58	73.22
Sox2	5.02	0.19	4.41	60.18	2.71	58.29
Dhh	6.15	0.36	4.93	71.31	5.13	64.12
Foxd3	1.96	0.088	2.28	24.85	1.22	32.24
