# Supplementary material for: Profiling sensory neuron microenvironment after peripheral and central axon injury reveals key pathways for neural repair
Source: eLife. 2021 Sep 29;10:e68457. doi: 10.7554/eLife.68457 (PMC8480984; doi:10.7554/eLife.68457)
Supplement: Figure 5—source data 1. [file elife-68457-fig5-data1.xlsx]

## Sheet: SGC markers
	Fabp7	Cdh19	Kcnj10	Glul
#cells	3278	1935	1485	2090
total	3460	3460	3460	3460
% of total	94.7399	55.9249	42.9191	60.4046

## Sheet: SGC subclusters
SGC clusters	% of cells		Cluster 1	Cluster 2	Cluster 3	Cluster 4	Astrocytes	nmSC(PNAS)80	mySC 99	4 common elements in "SGC1" and "Astrocytes":		3 common elements in "SGC2" and "Astrocytes":		77 common elements in "SGC3" and "Astrocytes":		23 common elements in "SGC4" and "Astrocytes":
1	30.78		POU3F1	GM13889	MT3	SCN7A	HGF	APOD	GATM	EZR		TRIM9		NRARP		C4B		18 common elements in "SGC4" and "nmSC":
2	29.57		EDNRB	CLEC14A	RP24-247B20.1	ANK3	GLI1	LUM	MBP	KLRI1		DDR2		PDPN		FXYD1		GSN
3	23.67		PLLP	DPH5	CTNND2	NRN1	AQP4	DCN	SOSTDC1	RARRES1		SORL1		FMO1		ENTPD2		MEG3	8 common elements in "SCG3" and "nmSC":
4	15.98		NKD1	FHDC1	NRARP	SBSPON	GLI2	SMOC2	PLP1	DDO				EEPD1		BHLHE40		ENTPD2	LUM
			PTMA	PGLYRP1	PDPN	CD9	BMPR1B	ANGPTL7	CNP					SLC4A4		NTRK3		MATN2	KCNK2
			SH3GL3	CD177	PGF	GFRA3	GLI3	GPC3	GPM6B					SLC7A2		EPHX2		VWA1	TRF
			SMIM5	SPINK2	TM7SF2	CADM2	LGR6	ITM2A	CD59A	1 common element in "SGC1" and "nmSC":				SFRP5		GFAP		RARRES2	APOD
			CLDN19	FLT1	JAM2	ALDH1A1	PLCD4	CCL11	ART3	EFEMP1				PLA2G7		FOS		COL3A1	CPXM1
			UCN2	CH25H	CHCHD10	C4B	PPP1R3C	COL15A1	MPZ					RDH5		CYR61		SPARC	DCN
			MPZ	SLPI	EPAS1	GSN	TNC	CD81	CADM1	1 common element in "SGC1" and "mySC":				ACSBG1		CHRDL1		CPE	ENPP2
			FAM53B	LRG1	FMO1	KCNA1	CCRL1	CP	KCNA1	MPZ				ALDOC		F3		COL1A1	CD34
			PDE10A	KCNMB4OS2	CDO1	IGFBP7	PLA2G3	MYOC	CADM4					AQP4		CLU		ITM2A
			SOX8	CLEC4E	GLUL	MEG3	SLC30A10	ENPP2	CMTM5	1 common element in "SCG3" and "mySC":				GJA1		LGI4		HSPG2
			BTG1	JPX	ZDHHC2	FXYD1	PTX3	CRISPLD2	SCN7A	APOE				HES5		GULP1		ISLR
			B230206H07RIK	CEP41	EEPD1	LGALS3	A2M	IL33	DBI					HEY2		ITGA6		COL1A2
			SOX4	GJB1	ACSS2	ENTPD2	ITIH3	VIT	GPR37L1	65 common elements in "SCG4" and "mySC":				ID4		NR4A2		MMP2
			3100002H09RIK	B3GAT2	SLC4A4	TXNIP	GCNT4	OSR2	FXYD3	SCN7A				FGFR1		SLC2A4		TMED2
			9530059O14RIK	MTHFD1L	CNTFR	RASSF4	MAMDC2	VWA1	SNCA	ANK3				DCLK1		LTBP1		CTSB
			SNX16	TREM1	PMEPA1	RASGEF1C	SLC14A1	CTSB	SOX10	NRN1				SLC1A4		SFRP1		MXRA8
			CDKN1C	NAPSA	IGFBP4	EMP1	ATP13A4	THBS4	ANK3	SBSPON				MLC1		LRRK2
			BTC	CYP2U1	SLC7A2	ATF3	SLC14A2	ABCA6	KCNA2	CD9				TMEM229A		OLFML1		1 common element in "SGC2" and "nmSC":
			NPPC	BC048403	ENHO	MRGPRF	GRM3	COL1A1	NCAM1	C4B				TLCD1		ATP1A2		SPP1
			ITIH5	AI848285	MVD	CDC42EP3	P4HA3	GSN	FXYD1	KCNA1				ADAMTS5		KCNN2
			BCAS1	GM5069	APOE	PDGFA	PAQR6	COL1A2	NRN1	FXYD1				HTRA1
			ACTG2	CX3CL1	SFRP5	FTH1	FGFR3		CRYAB	LGALS3				PTPRZ1
			GM6297	ZFP647	CSPG5	LPCAT2	EGFR	ABCA8A	APOE	ENTPD2				LCAT
			PRX	OBFC1	MFSD2A	C1RA	GDPD2	ECM1	PLEKHB1	ATF3				ALPL
			RPRML	CYBB	PLA2G7	VGLL3	NWD1	TRF	TSPAN15	FTH1				P4HA3
			GM26853	B230112J18RIK	CRABP1	KLF2	SLC4A4	MMP2	PRNP	CADM4				AGT
			SERPINB1A	SEMA3G	NSDHL	GTDC1	ITGA7	ABI3BP	STMN1	BHLHE40				CYP4F14
			1700040D17RIK	ZFP493	2310022B05RIK	ANTXR2	AQP9	SERPINH1	LGI4	MATN2				SH3PXD2B
			CXCL14	IFITM10	RSPO1	CADM4	ALDH1L1	SPP1	ASPA	CD59A				FABP7
			HIST1H4D	USP51	PTGDS	BHLHE40	ST6GALNAC5	RASGRP2	MAL	SNCA				SLC1A3
			FA2H	S100A9	BCAN	MATN2	CBS	KCNK2	SOCS3	B2M				MACF1
			SOX30	KDR	SDC3	CD59A	CYBRD1	MATN2	ARPC1B	PRNP				ITGA7
			CSRP2	4930506M07RIK	RDH5	RXRG	FMO1	CD63	PMP22	VWA1				CYP4F15
			HIST2H2BB	GRTP1	ACSBG1	NTNG1	PHKG1	COL3A1	CD9	KLF6				ETV4
			GM527	PPP4R4	ALDOC	SNCA	SLC6A11	LAPTM4A	CDH19	WWP1				SLC15A2
			ARHGAP19	NECAB1	CDC42EP2	B2M	OTX1	SDC2	FOS	CSRP1				FADS2
			STAC2	NFE2L3	AQP4	LGALS1	GM973	NUPR1	FABP5	RARRES2				SLC25A18
			GM15834	RP24-202N2.2	GPX1	PRNP	TTLL8	MEG3	CYR61	SOCS3				GDPD2
			GYPC	ALOX5AP	SNCG	VWA1	CTH	CCL7	SBSPON	BTG2				ALDH1L1
			CUX1	NKX1-2	CAR2	KLF6	CHRDL1	ENTPD2	PTN	FOSB				MAMDC2
			FBXO32	EFCAB2	SQLE	H2-D1	CCDC80	COX6C	H3F3B	H3F3B				ELOVL2
			EFEMP1	GM25177	GJA1	CYBA	SLC25A34	SEC11C	GAS7	PMP22				S1PR1
			NPB	GM16001	ACAT2	ITGB4	SORCS2	CPXM1	JUNB	GAS7				ECHDC2
			4930480K23RIK	CTHRC1	HES5	S100A11	CYP4F15	SPARC	JUN	CNP				GPC6
			GJC3	GM12224	GM14005	SERPING1	ENTPD2	CPE	TSC22D4	CDH19				VEGFA
			GALNT15	ATP6V1G2	HEY2	NTRK3	GRHL1	SELENOS	DUSP6	ART3				SLC13A3
			GM26584	BYSL	ID4	NRP2	5330437I02RIK	LAMA2	CEBPD	MBP				UPP1
			KIF26B	CCR1	IDI1	AHR	KCNN3	KDELR3	SDC4	SPARC				FOLH1
			RP23-45A13.4	DCLK3	VAMP5	MAG	CCDC37	RAMP2	WWP1	CPE				AW011738
			GM16833	SNHG7	FGFR1	OTUD1	DIO2	COPZ2	RGCC	JUN				PDGFRB
			NREP	HOXAAS3	HRSP12	WWP1	FZD10	RCN3	ATF3	JUNB				FGFBP3
			DPP4	RETNLG	DCLK1	H2-Q4	NAT8	HSPG2	CPE	FOS				ACSL6
			CPM	GM10658	CDH15	CSRP1	SOX9	MAGED2	TMEM176A	UBC				SORCS2
			CD79A	LST1	0610007P14RIK	EPHX2	FAM181A	OLFML3	NEAT1	PHLDA1				TEKT5
			METTL7A3	GM10419	GPRC5C	KCNJ12	CELSR1	MXRA8	VWA1	ZEB2				SLC6A11
			VMN1R58	GM609	DHCR7	ADAM23	SLC15A2	PRELP	SEMA3B	ASPA				GM11627
			CEP112OS1	1700086P04RIK	FBLN5	RARRES2	GM5089	EFEMP1	MT1	CADM1				SFXN5
			BTBD16	ZFP609	FBXO2	SOCS3	SLC7A2	ISLR	MARCKSL1	CYR61				CYBRD1
			MAB21L1	ATP10A	SLC1A4	BTG2	AIFM3	SPRY2	CNN3	ZFP36				NCAN
			CAR12	POLI	MLC1	FCGR2B	GLIS3	TCF4	CSRP1	F3				CALR4
			GM26766	DMC1	TMEM229A	FOSB	AI464131	CD302	CKB	AHNAK				RGMA
			OGDHL	2810417H13RIK	LSS	H3F3B	VNN1	SRPX	EGR1	TSPAN15				MYOM3
			TAS1R3	NFKBID	SC5D	COL3A1	KLRI1	MT-ATP6	ARPC1A	LGI4				TGFB2
			E530001K10RIK	PTGS2	PEX11A	ACVRL1	MYOM3	CYB5A	BTG2	TSC22D4				MAPK4
			C230004F18RIK	CDKL3	FHL1	GM9885	SLC7A10	MT-CYTB	EMP2	SAT1				VEPH1
			1300017J02RIK	CELF4	ENO1	FNDC1	SCTR	SELENOM	SPARC	ARPC1B				SLC1A2
			RP23-110B5.3	GM16537	HSD17B7	EPB4.1L4B	SLC39A12	COL6A1	IER2	MPZ				C2CD4B
			ICAM5	IKZF1	CRYM	PRSS23	MLC1	TUBA1A	SAT1	SDC4				GPAM
			GM9774	GM15852	CIB1	AHNAK2	PPP1R3G	RARRES2	LGALS3	MAL				KCNE1L
			PNMA1	TMEM198	SLC12A2	SCN1B	PIPOX	SELENOK	NDRG1	SOSTDC1				DDIT4L
			GSE1	9030617O03RIK	CYP51	L1CAM	FREM2	TMED2	KLF6	DUSP6				CIDEB
			SLAMF7	APLP1	TLCD1	PMP22	NOTCH3	CD34	C4B	EGR1				PLCD4
			CACNA2D3	GM17382	ADAMTS5	ARHGEF16	PAMR1	EBF1	UBC	STMN1				FREM2
			CPA3	TRIM9	HTRA1	HRCT1	EPHX2	SWI5	RARRES2	TMEM176A				FRAS1
			GFOD1	A330009N23RIK	LSAMP	GAS7	SLC1A3	KDELR2	LDHB	NEAT1
			GM26887	MMP8	PMVK	C1S1	PRDM16	HSPA5	SLC43A3	MARCKSL1
			COL7A1	STFA2L1	FDFT1	CNP	GM11627	CEBPD	VIM	DYNLRB1
			D930030I03RIK	ZMYND12	NKAIN4	TUBB2B	TRIM9		MATN2	TAX1BP3
			GM10615	HIST1H2AP	TSPAN13	FAM26E	FZD2		TAX1BP3
			ZFP869	SYBU	FBLN2	KLK8	2900052N01RIK		FOSB
			YBX1	RP24-531B21.1	SHISA4	CDH2	2610034M16RIK		ZFP36
			CD3G	PINX1	FAM171B	CSRNP1	GJA1		FTH1
			FAM174B	5033403F01RIK	LYRM4	LGI1	1700027L20RIK		ENTPD2
			SRRM3	2410018L13RIK	FDPS	GBP2	CRB2		BHLHE40
			GM15541	GM7353	HMGCR	BST2	SYPL2		MALAT1
			PRTN3	ANGPTL3	SCG5	DUSP26	1700084C01RIK		B2M
			MIR1192	GATA3	HMGCS1	MARCKS	VCAM1		UBB
			PKP2	RGS9	NT5DC2	IFIT3	TTPA		ZEB2
			HIST1H4J	LY6G	PTPRZ1	STBD1	PM20D1		TUBA1A
			TAL1	GM22299	CAMK2N1	LBH	ADHFE1		EIF1
			DCT	CCDC171	E130114P18RIK	TNFSF9	RORB		HMGB1
			FANCC	MATK	KCNN4	G0S2	2900005J15RIK		DYNLRB1
			KIF19A	DDX25	LCAT	CDH19	DAAM2		F3
			CCDC14	SPRY4	APOC1	CYS1	TMEM82		AHNAK
			KCNQ1OT1	1700056N10RIK	KCNJ10	FAM78B	RGS20		PHLDA1
			GSG2	GM20628	MYO10	SERPIND1	ABCD2		DUSP1
			STON1	AKAP17B	ST3GAL4	ADAM11	LRIG1
			FOXO6	GLRB	MVK	SEMA6D	GM266
			XLR3B	MPZL3	ALPL	FAM89A	SLC7A11
			WDR66	ANGPTL1	DDAH1	C3	CLDN10
			CHRM1	GM26778	P4HA3	ART3	FAM20A
			GM7120	GRIA4	AGT	GPNMB	RANBP3L
			YPEL2	AIRN	BAMBI	ZBP1	ELOVL2
			GM22743	HDC	CDH11	MBP	PALLD
			RNF207	LTB	CTSK	SPARC	SLC2A10
			BZW2	PHTF2	PTGES	CPE	IGSF1
			ZFP407	EPHB4	ACLY	DHRS3	AASS
			PLEKHA1	C5AR1	PHLDA2	ANGPTL2	SLC25A18
			ANO8	ARHGEF37	HMGN3	JUN	SFRP5
			NKAIN2	SLC39A14	ME1	PTK2	F3
			SH2D1B2	WASF3	MEST	EFHD1	FABP7
			RBM19	AOC2	CYP4F14	ANXA5	B230209K01RIK
			9330198N18RIK	ASNS	EHD3	TMEM140	FGFBP3
			TMIGD1	PBK	CRYBB1	IFITM3	EMP2
			HIST1H2AK	6030408B16RIK	HEYL	IFI27L2A	PDK4
			1500017E21RIK	PIM2	LIFR	GFAP	ACSBG1
			EZR	TNFRSF4	NTRK2	DEPTOR	KCNE1L
			AA474408	B230217O12RIK	SPON1	JUNB	NCAN
			RP23-179B10.2	BCAT1	CSDC2	TGFB1I1	IGFBP2
			TNFRSF26	UCHL4	CPQ	COL1A1	CD44
			GM20707	HOXA4	TEX40	OLFML2B	1500002O10RIK
			PIWIL1	SLC39A11	ADRA2C	RP24-131B6.1	GREB1
			ARHGEF28	CEACAM10	SFXN1	CHD5	GPC4
			NFKB2	HP	CDH1	RNASE4	HES5
			BAIAP2L2	S100A8	SH3PXD2B	FOS	SLC1A2
			HMGA1-RS1	SPINT1	SCGB1A1	MMP23	TLCD1
			WDR90	1100001G20RIK	GRAMD1B	NGFR	THBS1
			4731419I09RIK	A330074K22RIK	RLBP1	EHBP1	DZIP1L
			ATP2A3	OSBP2	HPDL	FXYD7	AI507597
			RNF128	CENPA	FNTB	LIMS2	LOC433374
			GM7628	BC025920	SPEG	S100A6	GFAP
			SIGLEC5	CCDC74A	FABP7	CHL1	EZR
			POLE	RBKS	LMO1	PCDH11X	LOXL1
			BFSP1	FMN2	VWC2	PQLC3	LIPG
			4930448N21RIK	IL1R2	SLC1A3	CLDN11	TST
			RAD51AP1	XPO5	SMIM1	CEBPB	PPAP2B
			GM15283	GM16386	MACF1	RAB32	VEPH1
			BC051077	GM5093	SLCO3A1	ANG	SLC13A5
			GM15879	4933427G17RIK	MIF	UBC	RFX4
			BC033916	FAM124A	KCTD1	MMP17	GRIN2C
			AMH	GM26237	AIF1L	THBD	SLC13A3
			FAM222A	KLHL40	AACS	TUBB2A	ELF5
			LRRC75AOS2	3110082I17RIK	IGFBP5	PLAT	FJX1
			LAMP5	IL1B	WFDC1	PHLDA1	FRAS1
			SOX5OS1	CD36	LECT1	FST	MEGF10
			GM16381	CYTH4	ID1	LHFPL2	SLC27A1
			CHIL3	CNTROB	ITGA7	PNRC1	2810055G20RIK
			HOXA6	ZBTB26	LUM	MKI67	LRRC23
			GM10447	EFCAB9	CRIP1	WBSCR17	PLA2G7
			GM24775	STK17B	RBP1	ZEB2	MFGE8
			GM16907	DDX11	COX7A1	METTL7A1	GABRB1
			HIST1H2AC	9930014A18RIK	RND2	ASPA	CCNO
			TNNI1	GM13205	IL25	NKD2	PAX6
			PKD1L3	GM16861	SOCS2	MGARP	RDH5
			UBE2CBP	GM22	DBNDD2	EGR2	DYNLRB2
			A530083I20RIK	9130019P16RIK	RTN1	IER5	CYP4F14
			GM15319	SGTB	PPP1R14B	PTPLAD2	HSD11B1
			A730085K08RIK	CDK19OS	CACNG4	IFI47	ADORA2B
			DNASE1L2	GM11274	LFNG	STK32A	ALPK3
			KLRI1	CYP3A13	FUOM	CADM1	GM17455
			HIST3H2BA	ZFP335OS	SMIM4	AKAP12	FOLH1
			GPAT2	XXYLT1	2020-09-04	ERGIC3	BTBD17
			NLRP1B	ARG2	TMEM121	RELN	VIT
			ABCA17	NCF4	PITPNC1	SGCD	ALPL
			NME8	XLR	F11R	SAP30BPOS	LTBP1
			SLC23A1	PARVB	TCEAL3	TCTEX1D4	LCAT
			GM15915	INPP5D	CYP4F15	H2-Q7	NGEF
			SRPK3	SLFN2	PTGFRN	SELM	GPAM
			E130309D14RIK	MAP6D1	1190002N15RIK	OXTR	AGT
			GM14798	LMX1B	ETV4	ADGB	MYLK2
			MED12	DEFB42	EHD1	PREX2	AW011738
			PPP1R1A	1810034E14RIK	NPL	RAB3B	OLFML1
			GM10785	ZFP626	FBXO44	CYR61	RAVER2
			A930015D03RIK	GM10655	CELSR2	ZFP36	ERBB2
			ZFP933	MPPED2	PANK3	HSD17B10	3930402G23RIK
			NOS1	NUDT12	KANK1	TALDO1	MUC1
			PCDH8	2810029C07RIK	PTPRG	CAPG	ARHGEF26
			EFNA5	1700003E16RIK	4931406C07RIK	RHOC	3110082D06RIK
			HELLS	GM10501	JAG1	IGSF21	DBX2
			GADD45B	GM11696	SLC15A2	EPB4.1L3	NAT1
			MOGAT1	E330017L17RIK	PCDH10	STARD13	HAPLN1
			ANKRD13B	CD1D1	MMD2	CHRDL1	4932438H23RIK
			GM26519	PCDH18	PEBP1	CHMP2A	AMOT
			GM11772	INHA	GSTM6	GM26532	AOX1
			SIK1	A430110L20RIK	FADS2	KLK13	CYP1B1
			B3GNT6	SLC52A3	AVPI1	DNM3	GGNBP1
			SPTBN4	RAB26	KCNK2	CXXC5	PRRX2
			D930048G16RIK	D630024D03RIK	ZFP60	MPP7	GJB6
			SCN4B	CACNA2D2	ROM1	CASP4	TSKU
			PRKAG3	GRIA2	RUNX1T1	B3GALT2	A930001A20RIK
			SLC44A3	GM26899	SLC25A18	GSTM5	MTMR11
			LGALS2	TLR13	PYGB	2310002F09RIK	PLCH1
			9230116N13RIK	GM14378	GDPD2	MAP1LC3B	UCP3
			DLK2	GM10110	TRP53INP2	F3	CCND2
			GM10369	HHATL	CD55	IFIT1	ACSF2
			PDE1C	PLXNA2	IL18	TMCC3	MAPK4
			4933406P04RIK	ZFPM2	STARD4	4833412C05RIK	NPHP3
			HBB-BS	TAF1A	MIA	ITM2A	ACSL6
			DFNA5	SPATA18	GM11837	AHNAK	SFXN5
			POU2F2	CCDC103	GM19705	RAB7	DDO
			IGSF9B	TCAIM	TPCN1	FLRT3	ITGA2
			PELI2	GM10642	DBP	GM13403	PTCH1
			CAMK1D	ZFP691	CGRRF1	CLU	DTNA
			6330403L08RIK	ZFP445	ALDH1L1	PIGZ	PTPN13
			A130057D12RIK	CCL6	MAMDC2	SMPD3	HTRA1
			PRDX6B	GM10083	ABAT	SERPINA3N	SPATA3
			PVT1	9330162012RIK	BSG	COL16A1	C4B
			RIT2	STX3	CHIL1	ATRAID	FRMPD1
			NUSAP1	MDGA1	GALNT18	RHOB	CAPSL
			FHL3	KIF23	KIT	FGL2	LRRC9
			GM21917	CCNB2	CASKIN2	PPFIBP2	SLC13A1
			SMOK3C	SPEF2	DPF3	PRKCQ	EGFL6
			GM25822	2020-03-03	SMCO4	TSPAN15	RASA2
			MMGT2	ZFP658	ELOVL2	SBNO2	MSX2
			PDGFC	GM14664	S1PR1	SEMA3E	GABRG1
			TNS4	LMO7	PHLPP1	RNF13	ATP1A2
			ELK4	GM996	SH3BGR	LGI4	RBPMS2
			GM24362	GM5900	CRLF1	TSC22D4	3110079O15RIK
			MFSD7C	GM10649	RPIA	ALDH2	LRRC38
			RRAGD	PRTG	PTP4A3	SAT1	TRIL
			PTPRN	CDK18	MTFP1	ETL4	4930579J09RIK
			CNIH2	KIF22	PTPRT	PSENEN	C030037D09RIK
			ZSCAN25	TMEM178B	IGFBP3	ARPC1B	D030047H15RIK
			GM4890	GM20683	ECHDC2	GM26569	SIX5
			OTUB2	4932435O22RIK	GPC6	ITGA4	CAR5B
			RLTPR	TLR12	ACOX1	PSMB8	9430041J12RIK
			GM21971	CCDC62	VEGFA	IQGAP2	ID4
			SNX30	KLRB1A	TTC38	PRRG4	SCARA3
			GM10643	HEBP2	UNC80	GAS2L3	ATP1B2
			TMEM116	MYO1G	USP2	H2-T23	A830093I24RIK
			FTX	DPF1	KCNJ16	IRF1	1700007K13RIK
			6720483E21RIK	IFITM6	CETN4	FADS1	1700003M07RIK
			GM12802	ALG13	VEGFB	GSDMD	BHLHE40
			A530072M11RIK	SAPCD2	NOL3	GULP1	ACOT11
			MAP4K1	FERMT3	KLHL13	LRRN2	IGDCC4
			FAM19A2	CD84	COL8A1	TSPO	MTAP7D3
			SLC35E2	ANKS6	COL14A1	SSR4	PPIL6
			GM16152	NCF2	PPARGC1A	FLNC	KLF15
			PRR22	WAS	SLC13A3	GNB2	TPBG
			ALDH5A1	PCDHB20	CRISPLD1	SHPK	PTPRZ1
			MRAP	SAA1	2020-09-11	ADRB2	SYNE1
			GM16638	9830147E19RIK	CLYBL	SOX17	G530011O06RIK
			DISC1	TNFRSF13B	TCF7L1	SEMA3C	FGFR1
			GM23887	A930006K02RIK	TMEM29	UBE2L6	VEGFA
			D330020A13RIK	SP140	SLC2A1	REM1	FXYD1
			GM26617	DOK2	LRP4	CPNE8	DMP1
			SMAD9	GM2415	ARVCF	GNB2L1	BDNF
			E130317F20RIK	ARHGAP27OS2	ABCG1	NFIX	LONRF3
			AMZ1	ZSWIM3	TMEM40	FOSL2	GM216
			1700023H06RIK	BCL2A1D	MTCL1	H2-K1	TRPS1
			F830016B08RIK	MGAT4A	ITSN1	TIMP2	LRRK2
			RBBP5	IL7R	ANKS1B	S100A10	UPP1
			GABRD	GPER1	TUBA1C	MPZ	ALPK1
			GM12580	TMEM45A	CAR13	SIPA1L2	WWC1
			TRIM17	LRP2	UPP1	CTSZ	ADRBK2
			GM14308	GM5884	FOLH1	FSTL1	NTRK3
			ABCC9	PTPN22	2210408F21RIK	AKR1A1	NHSL1
			9330104G04RIK	SCG2	SEMA4A	KCNA6	D930015M05RIK
			AV099323	CCNA2	GGACT	SDC4	IL17RD
			AA386476	GM15247	GSTA1	GBP5	SPRY2
			ESM1	MYCL	CXCR4	SIRT2	SLC1A4
			2310014L17RIK	SPC25	OSGIN2	CD151	4930417G10RIK
			KLRK1	RGS2	COL23A1	PCBP4	TRH
			2900026A02RIK	KCND3	4930444P10RIK	4930520O04RIK	MCC
			GAL3ST3	LCN2	CEND1	I830012O16RIK	GPC6
			DENND2C	CXCL2	LACC1	GBP7	LGR4
			GM12353	CNNM4	BC026585	ABCA8B	CAPN11
			RHOH	RP23-370J16.1	EVA1A	HSPG2	KCNN2
			NIPAL1	VSTM2A	NXN	MAL	PLAGL1
			RAPGEF5	MORN3	AW011738	PNP	CYR61
			1700011E24RIK	GM14286	PDGFRB	ANXA1	TCFAP2C
			PGAP3	2310010G23RIK	NFE2L3	CWH43	RSPH1
			SMIM13	PMEPA1OS	GRID1	ITPR1	ECHDC3
			OAS2	ISG20	ISOC2A	USE1	GABRA4
			GM26935	DDR2	0610040J01RIK	ANAPC11	SORL1
			A330102I10RIK	MDFI	ANK2	SLC43A1	PLSCR1
			LRCH2	GJB2	EXT1	CSMD1	5033404E19RIK
			CITED4	GM26873	TRF	TLE3	1600014C23RIK
			ELAVL2	5430416O09RIK	TMEM180	SLC35F1	PROCA1
			GM16091	D030025P21RIK	GSTT3	ISLR	DDIT4L
			LINCPINT	BARD1	HCN2	SOSTDC1	PCSK9
			CUEDC2	2310031A07RIK	GLRX	ATP8A2	EEPD1
			GM5602	2610305D13RIK	ST5	RGS3	TNFAIP8
			GM27253	PYCR1	PANK1	FAM47E	LRTM2
			GM15954	ABCC4	ASTN2	SERTAD1	SPARCL1
			GM9869	4930427A07RIK	FGFBP3	IDH3G	4932443I19RIK
			RNF150	SMAGP	RIPK4	AP2M1	LGI4
			RARRES1	CLEC4D	FRZB	BCAR3	ENKUR
			GM26682	CCNB1	ACSL6	1110004F10RIK	CML5
			MAP3K1	TRBC2	SORCS2	SYDE1	TGFB2
			WDR4	SORL1	TEKT5	JPH4	HHIPL1
			GGT5	CCDC69	LTBP2	DUSP6	IL33
			NANOS3	BOK	CTDSPL	UBE2D2A	TULP3
			TBX3OS1	FOXS1	CRABP2	SLC10A6	DCLK1
			SYTL3	TOP2A	SLC6A11	ITGA6	TMPRSS7
			POLR1B	MRVI1	ENTPD1	RIAN	COL4A5
			PTGER1	MXD3	KAZALD1	PRKCDBP	KCTD14
			SLC38A11	SMARCA1	GM11627	TMEM205	PAPSS2
			CYTH3	CD69	ARMCX6	DAZAP2	SNORA28
			THNSL1	EVI2A	APOD	LOXL2	HS3ST3B1
			BCR	UBE2C	NQO1	RND3	DNAIC1
			4932441J04RIK	IL1RN	SFXN5	RAB2A	RGS7
			MPPE1	HMMR	NRXN2	MMP19	POU3F2
			HBA-A2	ADRA1B	SMOC1	EGR1	GLDC
			ANKRD52	NUF2	FHDC1	PTRF	P4HA2
			SMTN	ARHGDIG	FAM69A	STMN1	CHST1
			SLC6A15	HMGCLL1	SEMA6A	TMEM234	HYAL1
			MBD4	CXCR6	TIFA	TRIM5	OLFML2A
			LINS	NCF1	SLC25A33	HSPA12B	DLK1
			PLXNC1	NPY	CYBRD1	RNF187	BOC
			RPS6KA5	BIRC5	HIST1H4I	TMEM71	RASL11A
			TPSAB1	APOA2	FAM107A	ADAP2OS	SYCP2
			9130020K20RIK	FAM64A	MKNK1	PLSCR4	SOX1
			SH3BGRL2	AURKB	ADCY2	VMN1R90	NCRNA00085
			GM8898	CDK1	FAIM2	FOXD2OS	4933409K07RIK
			GM16008	CDKN2A	A330048O09RIK	HFE	CD38
			4921531C22RIK	GM16283	CPXM1	KLF5	ECHDC2
			PANK4	SPP1	CPEB4	MAP3K8	NTSR2
			1110038B12RIK	BGLAP3	DCN	RHOU	DDR2
			E130215H24RIK	CENPF	APH1B	BBC3	SFRP1
			CLCA4	TWIST2	CTF1	ZFP703	3830431G21RIK
			2410080I02RIK	TESC	LIX1L	PTOV1	PDE9A
			NXNL2		SLCO1C1	SDF4	GLB1L
			FOCAD		THBS3	ASB2	SCG3
			TSACC		TYRP1	COL27A1	GM17660
			GM26522		TRAF4	OCIAD1	WNT7A
			ACOT10		ADAMTS15	NFATC2	CMYA5
			KCNH1		LPAR3	TXN2	AXL
			GM26776		SPHK1	NFKBIA	MMP14
			BC005561		SHF	NFIL3	TNFRSF19
			CDH4		ZFP663	NPR3	DGKB
			KCNA4		PHLDB2	SYNM	ACSS1
			TSPYL3		SLC23A2	BHLHE22	ASPG
			SLC41A2		KIF1C	TCN2	TEKT5
			KLHL3		AQP2	NR4A2	ALS2CL
			2700046G09RIK		BMP7	TMEM176A	NOTCH2
			CYB5RL		TM4SF1	VAT1L	P2RX6
			5730559C18RIK		NMNAT2	OASL2	ZNRF3
			1810011O10RIK		6430573F11RIK	COL20A1	ID3
			GM12522		COX4I2	MGLL	HEY2
			CBX2		TNXB	IL1RAP	SNED1
			C030034I22RIK		ETV5	GABRA3	CCDC121
			B3GALNT2		CCDC106	EIF3H	GM11128
			GM13010		FSTL3	CDC37	SNORA2B
			ZFP575		CDA	CXCL1	BAALC
			PCSK6		CAR14	EEF2	EPHB3
			2210008F06RIK		TMEM100	GGTA1	DHTKD1
			FXYD5		SALL2	PARP3	LIX1
			2010111I01RIK		GPR37	GSTM2	DDHD1
			GM16279		NCAN	LYSMD2	RGMA
			GM12744		TAGLN	SLC9A3R2	S1PR1
			BC068157		GAS6	SRRM2	WDR52
			CWF19L1		GRIFIN	CALR	ODZ3
			CLIP4		ANGPTL1	NUDC	SP6
			ZFP334		DYSF	IL34	FAM198A
			TUSC1		MMAB	COL1A2	GRM5
			DENND1C		COBL	ZFP36L1	GM11992
			GM13133		CALR4	ARL11	THBS4
			SYT4		NRCAM	CSNK1A1	WDR69
			IL1R1		CHD3	OTOR	2810030E01RIK
			GMCL1		RAB15	BNIP3L	ADAMTS6
			SLC5A2		RGMA	ATP8B1	C2CD4B
			GM26563		ZMAT3	CLIC1	HECTD2
			FAM228A		MYOM3	RER1	PDYN
			UPK1A		RDH10	PSME2	STON2
			XKR8		EPHX1	FKBP8	EVC
			ACAT3		HIP1	RSRP1	TOM1L1
			GM24959		TRIB2	MOCS2	SP5
			DARS2		SRXN1	RAB11B	NR4A2
			PGAP1		FARP1	NISCH	NDRG2
			RGS17		PLEKHG2	POLR2J	TIMP3
			SETD4		SULF1	NDUFS4	ALDOC
			ALG8		GM17750	NEK6	A430105I19RIK
			A730017C20RIK		BC028528	NEAT1	NR2E1
			AU021092		TGFB2	PSMC3	FGF1
			GM21781		SLC25A35	SELENBP1	GM2061
			CLEC12A		MAPK4	OPCML	HIF3A
			A430033K04RIK		IYD	RAB18	RARRES1
			SPATA5L1		SHROOM3	MCEE	PTAR1
			GM26982		PVRL1	PPP2R2B	MFAP3L
			BTBD10		GM20748	MID1IP1	GULP1
			HOMER2		RAPSN	VMP1	CCDC67
			RP23-451E8.1		TMEM56	LAYN	PRSS35
			GM11747		KBTBD11	TMEM160	PDPN
			1810019N24RIK		PDE3B	NR3C1	PPARA
			GBP4		KALRN	MMP2	SLC2A4
			B130034C11RIK		NBL1	TSEN34	GAS1
			SPAG4		SEC24C	SLC22A23	MALAT1
			1700028J19RIK		ENPP2	PARP14	CLU
			B230208H11RIK		NEFL	IRF7	RASGRP1
			CACNG7		VEPH1	GBP6	RHCG
			FAM189A2		IGFBP6	MARCKSL1	GPR156
			PTPRU		ENO1B	ENDOD1	SFRS18
			GM11266		PPP2R2C	ESYT1	ADCYAP1R1
			CLEC4A3		TNKS1BP1	H1F0	PER3
			MS4A7		UCHL1	SERINC1	PLN
			SNORA33		SLC24A3	SLC31A2	PLXNB1
			HAS2OS		NES	ECH1	CAR8
			ZFP146		EHF	GM15440	GLYCAM1
			ARHGEF40		PEAK1	1500009L16RIK	BAI3
			GM26830		TTC18	DACT3	EPB4.1L5
			SLC25A37		NRXN1	TRIM12A	PBXIP1
			SEZ6		SRGN	SORBS2	BDKRB2
			ARHGAP18		GALE	CDKN2C	GPR179
			DDC		CASKIN1	BCL2	GM9766
			DOPEY1		MAP2	SF3B2	FOS
			AI848285		ARRB1	BRK1	IRS2
			PRKAG2		FGF12	BCOR	DRP2
			PNMA2		LHPP	HSP90B1	PARD3B
			EXOSC2		TCEAL5	SLC2A4	TMEM229A
			CLEC4A1		SLC1A2	MYC	PAX4
			POGZ		C2CD4B	PIEZO2	EVC2
			PIRB		MEGF11	PCDH9	RNF215
			MAPT		KCNK3	HSPB1	GM10560
			NUPR1L		SHISA7	ABCA9	PDGFRB
			1810041L15RIK		RARB	SYF2	NDP
			CAPN9		RHOD	LTBP1	CML3
			URB1		STMN3	FOXD3	EXD1
			3010001F23RIK		PDGFRL	SNAPIN	SMYD1
			CHST15		GSG1L	1700023L04RIK	NPAS2
			HERC3		COL25A1	ATXN7L3B	PRODH
			GM16287		PCDHA10	TMED2	CYP7B1
			NTN5		1700023F06RIK	SEC11A	NPAS3
			DDO		LINGO1	CLCA2	MTL5
			MZB1		EPS8	TRMT112	FAM55D
			PRICKLE1		HPGD	PSMC1	MYH6
			MAPK8IP2		GPAM	PCBP1	FGD4
			RP24-155O13.4		KCNE1L	RSU1	NPFF
			C3AR1		ADORA1	PPL	EFNA4
			GPR157		MICAL2	CTSB	LXN
			A330021E22RIK		COL12A1	THRA	APPL2
			PCSK4		MPP2	NDUFV1	AK4
			SETMAR		ROPN1L	PHF11D	CALR4
			2610044O15RIK8		MDGA2	SIN3B	CAMK2G
			ZFP128		SHANK2	CCHCR1	D130040H23RIK
			PEO1		NUAK1	FERMT2	ADRA2A
			TMEM185B		LRRC42	COL5A1	SLC9A3R1
			KIF13B		1700001O22RIK	UNC50	KLF4
			ZFP850		DDIT4L	FAM134B	FGFR2
			MPP6		GM19426	SNTA1	GM12238
			PDE7B		ARHGAP28	CAMK2D	ETV4
			PRKCD		CIDEB	SFRP1	FAM59B
			RPUSD2		BC067074	H2-M3	RASL11B
			AMIGO3		TPD52L1	POLR1D	ABCB9
			GALNT7		PCP4	YBX3	CIDEB
			RGL2		PLCD4	FBXL2	DMD
			NSUN5		KCNK1	NFASC	POU3F4
			ANXA11		RORC	GAB1	2810459M11RIK
			ANKUB1		IL18BP	SSB	TEX9
			HBA-A1		MYO16	TNFAIP8L1	GLUD1
			PPP1R13L		ARHGAP23	JUND	GM10565
			GM26735		PARD6B	LRRK2	MGST1
			FAM83F		GUCY1A3	ANKRD44	MACF1
			SUGCT		SLC22A4	SNX17	NR4A3
			A230107N01RIK		BC048546	MXRA8	5930412G12RIK
			ASB5		SLC12A7	OLFML1	SNCAIP
			SHQ1		PIR	PAK3	AU021034
			GM26737		SSX2IP	FKBP4	TMEM200C
			LIN7A		ACKR3	LEF1	AK7
			1110035H17RIK		FAAH	AFAP1L1	NRARP
			GM26772		1700086O06RIK	DYNLRB1	FAM84A
			RHBDL3		FGFRL1	GIMAP5	CCDC3
			STAMOS		2010320O07RIK	GNB4	VAV3
			SKIL		AQP11	SYS1	NEK8
			1500004A13RIK		GM11713	MET	43352
			NIN		CHSY1	ITGA1	CNN1
			STK10		NHS	MAFF	NMB
			1110002L01RIK		SLC22A18	1100001G20RIK	GPT
			LRRC25		GNG3	PLCE1	FGD6
			4930570G19RIK		MEIG1	SPINT2	CECR2
			JMJD7		CTSH	ZFAND6	CSPP1
			KBTBD7		LRAT	VAV1	FADS2
			CORO6		PVALB	TAX1BP3	NCKAP5
			NPY1R		ZBTB18	SOCS1	SH3PXD2B
			GM4707		RMDN2	S1PR3	SLC6A1
			GM17608		EFCAB12	SH2D4A	FAM69C
			RTEL1		FREM2	PCMT1	C130071C03RIK
			PHF11B		FAM149A	TMEM106A	STK38L
			GM4353		NME5	A4GALT	GABBR2
			2700012I20RIK		FRAS1	PDGFD	PCDHGC5
			TRPC2		FUCA2	PPIP5K2	A930017M01RIK
			1810032O08RIK		FAM46C	GBP3	FGF2
			A930024E05RIK		SLC8A2	ATP1A2	ITGA6
			GM10125		TUBB6	SRSF3	ADAMTS5
			4632404H12RIK		PAPLN	TMEM123	LOC329427
			NEURL2		1810021B22RIK	ARF1	SOX2
			RANBP10		PTPN14	HMGCS2	KCNC4
			SLC26A7		TMEM35	NRP1	RASSF10
			PRSS53		SERPINF1	SMPDL3A	GM889
			ZFP280D		AK5	HDAC7	ZFP280C
			PYGO1		CD34	IRGM1	LENG8
			HPS1		CHST11	TXNDC17	AA387883
			PDE7A		UPP2	KCNN2	PLD2
			FREM1		PNPLA3	GJC1	DNALI1
			TRMT10A		4933407L21RIK	DOCK11	ARHGEF33
			CEACAM1		IFFO2	COL18A1	PTN
			ISL2		TRIM29	C2	1700019G17RIK
