# Supplementary material for: Profiling sensory neuron microenvironment after peripheral and central axon injury reveals key pathways for neural repair
Source: eLife. 2021 Sep 29;10:e68457. doi: 10.7554/eLife.68457 (PMC8480984; doi:10.7554/eLife.68457)
Supplement: Figure 6—source data 1. — GFAP image analysis in DRG sections. [file elife-68457-fig6-data1.xlsx]

## Sheet: SGC subtypes injury markers
	Cluster 1	Cluster 1 p-value	Cluster 1 fold change	Cluster 2	Cluster 2 p-value	Cluster 2 fold change	Cluster 3	Cluster 3 p-value	Cluster 3 fold change	Cluster 4	Cluster 4 p-value	Cluster 4 fold change	Cluster 5	Cluster 5 p-value	Cluster 5 fold change	Cluster 6	Cluster 6 p-value	Cluster 6 fold change	Cluster 7	Cluster 7 p-value	Cluster 7 fold change
1	HES5	0	6.76341	POU3F1	2.46016e-281	6.63078	FIBIN	1.04755e-28	1.51182	ALDH1A1	0	54.1572	MT-ND1	0	2.05439	BIN2	4.93477e-244	1.53295	HMGA2	0	287.481
2	PHLDA2	0	6.49208	PTMA	3.51372e-126	1.64338	A230065H16RIK	9.7983e-20	1.62076	GFRA3	0	45.4879	MT-ATP6	0	1.87839	1810011H11RIK	1.03111e-182	1.55157	SYT4	0	268.74
3	RP24-247B20.1	0	6.31395	RPLP0	5.09486e-111	1.56468	NDP	2.37103e-15	1.5147	NRN1	0	41.2667	MT-CYTB	2.06865e-268	1.85521	LPXN	2.59809e-163	1.52003	CLCF1	0	164.505
4	RSPO1	0	5.6346	CPE	1.46003e-87	1.63151	AI848285	2.57481e-15	1.63106	SCN7A	0	38.2773	MT-CO1	2.92416e-241	1.85866	CD40	6.34781e-138	1.68775	SHH	0	153.191
5	CDH15	0	5.2498	RPL3	1.44215e-85	1.53584	KLHL6	7.11641e-12	1.56135	RASSF4	0	26.331	MT-CO3	2.12407e-214	1.84297	CYP4F18	3.58223e-102	1.5868	GJB1	0	137.719
6	MT3	0	4.93659	NKD1	9.96535e-82	3.84546	EPHB1	3.83331e-11	1.53443	CADM2	0	25.6737	APOE	1.12421e-194	1.82429	TK1	3.21307e-96	1.87214	BOK	0	99.7459
7	CRYM	0	4.5608	RPS6	2.43804e-57	1.50722	SPINK2	1.34038e-09	1.82566	FCGR2B	0	24.1412	MT-CO2	1.10065e-178	1.86007	GSN	1.02829e-75	1.6563	PNOC	0	82.1385
8	GM14005	0	4.49066	EDNRB	1.76942e-54	1.72586	CH25H	1.92858e-09	1.83476	EMP1	0	13.1717	MT-ND4	1.46578e-172	1.92213	PTPN7	1.6803e-75	1.7578	FOSL1	0	68.7967
9	PGF	0	4.48932	SH3GL3	9.5693e-49	5.25663	MXD3	2.24056e-09	1.9777	SBSPON	0	12.7794	HMGCS1	4.07005e-77	2.10973	GM21975	2.13823e-69	1.8458	GDNF	0	67.676
10	AQP4	0	4.35614	BTG1	7.78656e-46	1.78842	HIST1H2AP	1.08683e-07	2.00228	RASGEF1C	0	11.9299	FABP7	5.63237e-75	1.95772	AURKB	2.78652e-47	1.54338	CGREF1	0	63.0311
11	NRARP	0	4.27863	PLLP	8.24155e-43	2.50183	MAP7D2	2.35598e-07	1.59041	ANK3	0	11.3844	SLC4A4	2.93547e-65	3.00368	H2-OA	4.0487e-45	1.83165	GLDN	0	52.7122
12	CDO1	0	4.22164	YBX1	6.54482e-40	1.82167	KIFC5B	4.11835e-07	1.52911	PDGFA	0	11.2661	SCD2	2.10886e-56	2.11926	TWIST2	1.78687e-44	1.52464	HMGA1	0	50.3636
13	AGT	0	3.67449	SNX20	4.24892e-39	1.51218	CDK1	4.39078e-07	1.83372	MRGPRF	0	10.5636	RP24-247B20.1	2.40044e-56	2.50417	CPE	2.89759e-40	1.58762	BTC	0	39.4343
14	CRABP1	0	3.64389	PDE10A	2.23096e-33	3.0956	USP51	9.52983e-07	1.74916	CDC42EP3	0	10.0873	FDPS	4.46449e-54	2.17772	UBE2C	3.10851e-40	1.53912	ST8SIA5	0	35.4201
15	CTNND2	0	3.58825	BCAS1	1.30781e-32	2.36079	OLFM2	2.57801e-06	1.70773	IGFBP7	0	9.77962	SLC7A2	8.03132e-52	3.24684	EDNRB	2.47829e-37	1.59603	LGR6	0	31.1016
16	MLC1	0	3.56479	RPS3A1	9.15021e-32	1.51708	NECAB1	5.00854e-06	1.53067	COL1A1	0	9.24315	BCAN	8.50066e-51	2.20251	GPR84	1.16159e-36	1.54314	PCOLCE2	0	29.6048
17	TM7SF2	0	3.5554	CLDN19	4.54962e-30	3.03136	VWF	7.17033e-06	1.57987	TXNIP	0	7.40697	MT3	9.01775e-51	2.14588	2010107E04RIK	1.65028e-34	1.50812	BTBD16	0	28.2601
18	EEPD1	0	3.53763	MPZ	8.16573e-26	1.52882	PBK	8.39556e-06	2.66688	C4B	0	7.3283	SLC12A2	1.93611e-48	2.94385	SIGLEC1	7.58243e-30	1.58256	NKAIN1	0	17.9117
19	CSPG5	0	3.53245	CDKN1C	3.85176e-24	5.35376	CDC25B	8.74902e-06	1.52682	SNCA	0	6.93533	SNCG	2.88618e-47	1.61665	SKA1	2.22158e-29	1.81789	ANKRD33B	5.62887e-305	34.5272
20	GLUL	0	3.2816	CSRP2	1.9004e-22	2.96	TK1	1.12099e-05	1.66806	MEG3	0	5.84452	FBLN5	2.85901e-46	1.97903	BANK1	2.66901e-25	1.64807	NGFR	7.01395e-303	35.4997
21	JAM2	0	3.24086	FAM53B	2.12137e-22	2.33325	CDCA3	1.49033e-05	1.74905	LGALS3	0	5.08555	ALDOC	5.52006e-46	2.01754	GM4955	1.57497e-22	1.6094	9530036O11RIK	1.60846e-290	9.18014
22	PLA2G7	0	3.23961	SMIM5	1.57861e-19	2.84954	CCNB2	2.01182e-05	1.67572	KCNA1	0	4.90184	ACSBG1	2.22029e-45	2.06511	COX7A2	1.90566e-22	1.51909	GM26894	1.6551e-287	18.0014
23	PDPN	0	3.14191	BZW2	6.60095e-19	2.44918	2810417H13RIK	4.62725e-05	1.52644	GSN	0	2.87636	PMEPA1	1.58816e-42	2.39216	FGR	7.39787e-21	1.50449	STEAP3	1.26025e-280	45.354
24	HEYL	0	3.133	CUX1	8.57231e-18	2.09725	C1QL1	0.000123713	1.53385	CYBA	1.43E-322	5.19161	ABCA8A	4.11443e-41	2.32191	CMKLR1	3.7575e-18	2.10086	GFRA1	7.92428e-274	26.5036
25	SNCG	0	3.06243	SOX4	8.43752e-17	2.2245	GRIA2	0.000214646	1.60043	LGALS1	2.92552922344E-313	3.2395	SFRP5	6.86716e-41	1.53539	CTNS	3.85449e-18	1.53845	FGF7	1.43848e-257	19.254
26	CHCHD10	0	3.05505	CDKN1A	1.675e-16	1.60992	LTB	0.000218282	1.71265	KLK8	2.4666717017441E-310	14.0095	CTNND2	4.68177e-39	2.42243	UQCR11	4.71283e-16	1.58515	GADD45B	2.73697e-254	29.8124
27	DDAH1	0	3.00122	PDGFC	4.2737e-16	2.23522	BIRC5	0.000450628	1.76986	TUBB2B	3.20304e-304	9.84562	SQLE	1.6128e-36	2.23069	ITIH5	6.78778e-16	1.62736	ATP6V0D2	1.08377e-253	15.737
28	SLC1A4	0	2.99695	CYTH4	1.16465e-14	1.75157	UBE2C	0.000486205	2.04722	C1RA	3.56209e-302	16.0285	ADAMTS5	1.59048e-35	2.57123	PPP1R1B	2.52377e-15	1.54015	SGK1	4.10352e-246	39.6479
29	ZDHHC2	0	2.98526	GJC3	1.14262e-13	1.68541	TOP2A	0.000646428	1.8307	ENTPD2	4.02446e-302	4.17313	SDC3	2.47867e-34	2.52724	NDUFA7	4.42233e-13	1.55313	DOK5	1.007e-245	28.1682
30	SLC7A2	0	2.92358	GYPC	5.46505e-13	2.30538	FAM64A	0.000825358	1.54906	MAG	7.65608e-295	12.9096	MT-ND2	9.68438e-34	1.66571	GFAP	2.89546e-12	2.40427	CXCL14	1.14639e-212	24.9761
31	EPAS1	0	2.79113	SNX16	9.77188e-13	1.86698	AREG	0.00222692	2.47183	S100A11	1.86867e-289	4.4735	EPAS1	8.23279e-33	2.33749	PIPOX	8.20336e-12	1.75299	4933408N05RIK	1.42183e-205	6.04867
32	LSS	0	2.78539	FA2H	5.21195e-12	2.12615	NPNT	0.0038143	1.55686	CADM4	7.0882e-285	5.12902	HES5	1.44311e-32	2.68491	FAM101A	1.19361e-10	1.68618	LRRFIP1	3.13228e-193	17.2518
33	MFSD2A	0	2.77219	PLEKHA1	2.8658e-11	1.92711	MIR1897	0.00554373	1.52468	LPCAT2	3.37041e-284	10.6991	CHCHD10	5.20788e-32	2.0605	BBOX1	1.24482e-10	1.63701	EPS8	8.71998e-186	22.4538
34	IGFBP4	0	2.72793	PIWIL1	7.57535e-11	2.85152	ABCB4	0.00601145	1.51129	FTH1	6.91793e-277	1.6808	GLUL	5.59127e-31	1.57202	NDUFA2	3.46676e-10	1.5735	TUBB2B	2.95325e-185	18.3677
35	FMO1	0	2.72027	SOX8	1.12193e-10	1.97193	GM1976	0.00640675	1.5183	ANTXR2	9.89574e-272	10.7047	NRARP	1.02849e-28	2.07962	COL9A2	5.59146e-08	1.62018	PPFIBP2	3.96277e-180	16.539
36	MVD	0	2.70919	YPEL2	1.62324e-10	2.28963	CTXN3	0.022391	1.50684	FNDC1	3.60336e-263	23.6877	CST3	1.6589e-28	1.63598	SOX3	1.14658e-07	1.64968	GPC1	6.32238e-172	17.1798
37	PTGDS	0	2.6422	PRKCD	2.91795e-10	1.87635	RBP7	0.0242407	1.78155	ACVRL1	5.07194e-260	10.2003	PTGFRN	2.59583e-27	3.04613	GAL	1.96884e-07	1.53256	CERK	6.94061e-164	14.7822
38	GPX1	0	2.62521	CEBPA	4.03606e-10	1.57894	GPIHBP1	0.0395057	1.68642	ITGB4	9.52219e-255	5.52746	MMD2	7.85922e-26	1.65421	SMIM5	1.33526e-06	2.0608	FAM150B	2.89188e-162	58.7819
39	SFRP5	0	2.61911	B230206H07RIK	6.22844e-10	2.47358	CXCR6	0.0573036	1.52747	ANGPTL2	1.57751e-251	6.69733	HMGCR	1.50822e-25	2.49885	GAPT	1.96265e-06	1.52511	SFN	5.63505e-155	38.741
40	SPON1	0	2.58632	ACTG2	6.84407e-10	2.61868	GYPA	0.161189	1.65194	PRSS23	1.84512e-247	4.39289	MLC1	5.66332e-25	2.54925	NPPC	6.64456e-06	2.00419	TTC9	4.95486e-152	14.2471
41	ACSBG1	0	2.47102	4930469K13RIK	7.06959e-10	2.4124	NPY	0.197073	1.53282	VGLL3	1.07596e-239	8.34348	MSMO1	1.13462e-23	1.85924	LECT1	1.24479e-05	1.52246	IL17B	4.83125e-148	29.008
42	ACSS2	0	2.44566	NAV1	2.02603e-09	1.83729	CCL21A	0.300602	1.69355	NTNG1	3.86657e-236	9.62471	CDH1	3.09705e-23	2.64721	CD177	1.57825e-05	1.83028	GM16316	3.27276e-147	23.2583
43	FHL1	0	2.41543	SMTN	3.35298e-09	2.14378	CCL5	0.314281	1.88305	TUBB2A	1.0875e-227	6.3806	FBLN2	2.66015e-22	1.83086	SERPINB8	3.23706e-05	1.75913	PLAUR	5.19919e-146	19.3345
44	TSPAN13	0	2.38339	DLEU2	5.84422e-09	1.84276	FABP4	0.451007	11.686	CD59A	7.64212e-224	3.02276	FMO1	7.65437e-22	2.07269	TDRP	3.93779e-05	1.95744	TMOD1	5.57663e-146	12.8053
45	ACAT2	0	2.35527	3100002H09RIK	8.83896e-09	2.55614	HBB-BT	0.65226	1.547	RXRG	1.06481e-223	3.8287	CYP51	1.40519e-21	1.99133	E2F8	4.24739e-05	1.57947	PDLIM1	1.8852e-144	17.0522
46	CNTFR	0	2.34533	NPB	9.73967e-09	2.33617				NTRK3	3.17731e-223	18.2527	PTPRZ1	6.1253e-21	2.22812	KCNH1	5.92801e-05	2.24871	PTRH1	1.24805e-142	13.5335
47	PEX11A	0	2.3272	NPPC	1.40217e-08	2.67027				B2M	8.69405e-213	2.08819	SCD1	1.0311e-20	2.0006	TEX26	7.1364e-05	1.7942	MAP6	3.34083e-138	10.185
48	FABP7	0	2.30604	CERS6	1.46117e-08	1.91587				AHNAK2	7.60192e-212	4.59065	ITGA7	1.98109e-19	2.33545	CEP85L	9.95464e-05	1.66541	GLIS1	3.69003e-136	7.06405
49	CDC42EP2	0	2.29475	MMGT2	1.56704e-08	1.88347				PMP22	1.35475e-208	3.69545	ADAMTS15	2.97287e-19	3.91965	CHST8	0.000135719	1.54954	HMGA1-RS1	3.38582e-133	12.6714
50	2310022B05RIK	0	2.28747	NIPAL1	2.66227e-08	2.30965				AHR	8.46442e-208	7.04907	IGFBP4	1.70759e-18	1.60974	GM5431	0.000154444	1.55139	UBASH3B	3.24778e-127	15.4033
51	FDPS	0	2.28564	SH2B2	2.91555e-08	1.59183				ATF3	5.38668e-206	10.776	CRYM	1.83068e-18	2.47663	SPRR1A	0.000220039	2.67381	UCN2	8.82541e-124	14.4683
52	HSD17B7	0	2.28458	EEF2	3.08143e-08	1.58342				SERPING1	3.0525e-205	4.94478	CDH11	5.39012e-18	2.32344	PTHLH	0.000229791	2.19336	TUBB3	5.36562e-122	29.3109
53	SLC4A4	0	2.27257	ARHGAP19	3.64739e-08	2.07401				FXYD7	2.41428e-202	4.77602	AQP4	8.81341e-18	2.88613	SNTB1	0.000232201	1.50299	NPTX2	3.70821e-120	22.5384
54	NSDHL	0	2.23285	SIGLEC5	1.28303e-07	2.05499				H2-D1	4.61329e-202	3.10982	SLC1A4	1.19541e-17	2.65306	LY6H	0.000245052	1.57127	TUBB2A	2.70066e-116	12.9263
55	ALDOC	0	2.23033	HBB-BS	2.47789e-07	3.1036				ADAM23	1.40665e-197	4.26147	PLA2G7	1.9221e-17	2.41292	SLC4A11	0.000274872	2.77049	CAV1	6.10243e-116	12.2741
56	ENHO	0	2.22269	EFEMP1	2.54695e-07	1.54008				KLF2	2.75652e-193	9.29902	HMGN3	2.10809e-17	2.03861	B3GAT1	0.000376621	2.29569	RUNX2OS1	6.65268e-113	14.0574
57	HMGCS1	0	2.21637	2010111I01RIK	3.07958e-07	1.71042				KCNJ12	4.52606e-191	19.0311	MT-ND3	2.17764e-17	1.72205	VSTM2B	0.000457742	2.81967	FOXQ1	2.46638e-112	18.84
58	CAR2	0	2.1909	KIF19A	3.44237e-07	1.89987				HRCT1	1.5546e-186	14.9846	FGFR1	8.04329e-17	1.96209	GM13111	0.000461875	1.59344	ASNS	3.71386e-110	12.8579
59	LYRM4	0	2.1908	HDC	5.93814e-07	1.78152				SCN1B	2.48659e-185	5.27716	ACLY	2.50865e-16	2.10624	PLCB1	0.000470674	1.57977	NPTX1	6.3698e-109	11.0012
60	SCG5	0	2.18963	FAM174B	7.24215e-07	2.21462				BHLHE40	8.64294e-185	5.98249	EEPD1	4.29448e-16	2.11432	ANKRD6	0.00050758	1.86931	TNFRSF12A	1.15393e-108	15.0525
61	P4HA3	0	2.14324	IL1R1	1.00667e-06	1.63205				BST2	9.16169e-185	4.99333	CNTFR	4.86114e-16	1.82217	CENPN	0.00054088	1.80205	NOV	1.12266e-106	16.0875
62	RDH5	0	2.13947	9530059O14RIK	1.49239e-06	2.12221				FAM26E	3.03172e-184	15.75	CXCR4	8.3527e-16	3.20095	MT2	0.00060042	1.64627	MYL1	3.08815e-104	15.374
63	FBLN5	0	2.11055	MCM7	2.16227e-06	1.69852				LIMS2	1.07489e-181	8.07559	VEGFA	2.61538e-15	3.92226	NNAT	0.000880508	1.54909	PADI2	4.05871e-104	12.0557
64	ID4	0	2.10732	ITGAL	2.18294e-06	1.50055				H2-Q4	8.44478e-181	4.43004	TMEM229A	7.26142e-15	2.13749	GDF15	0.00101097	2.07367	DOK4	1.74092e-103	18.3438
65	HRSP12	0	2.09204	ARHGEF28	4.62522e-06	1.75888				GTDC1	1.06377e-180	7.34721	SH3PXD2B	2.31312e-14	2.26035	TYRO3	0.00108123	1.56047	WFS1	3.07981e-102	19.6942
66	ADAMTS5	0	2.0713	AI848285	7.55466e-06	2.05593				COL3A1	5.21232e-180	4.15292	PTGDS	2.54673e-14	1.66949	CHEK2	0.00137683	1.61094	ADAMTSL1	1.5188e-100	17.7332
67	GJA1	0	2.05031	KLF4	8.19257e-06	1.61969				KLF6	1.03639e-178	4.75095	KIT	2.92522e-14	2.46251	ARHGEF28	0.00151558	1.56217	DUSP10	7.27743e-99	13.0859
68	PMEPA1	0	2.03971	CRYL1	8.49121e-06	1.6727				VWA1	1.62878e-177	2.25368	MT-ND5	3.32122e-14	1.71948	BCL6B	0.00160645	1.59674	MET	3.26025e-96	9.89309
69	HMGCR	0	2.02917	CALM2	1.42727e-05	1.5405				ADAM11	1.38166e-174	8.92579	MT-ATP8	6.01101e-14	1.61125	ARHGAP20	0.00175696	2.11854	FILIP1	1.67705e-94	12.3357
70	FAM171B	0	2.02128	HBA-A1	1.44512e-05	2.7779				MMP17	1.41252e-173	7.00596	GRAMD1B	6.28342e-14	2.44688	PCSK6	0.00198709	1.63883	ACOT7	6.72397e-94	8.74242
71	CAMK2N1	0	1.98411	GADD45B	1.89698e-05	1.66318				EFHD1	5.74543e-171	4.70255	KIF1B	7.70156e-14	2.08088	MFSD7C	0.00199902	1.86164	NPAS2	1.04062e-93	4.38404
72	IDI1	0	1.98382	1110038B12RIK	3.4451e-05	1.85987				ARHGEF16	1.07762e-168	8.76882	ID4	4.97764e-13	1.91377	KCNH2	0.00230075	1.59276	NRCAM	3.86637e-93	11.1856
73	BCAN	0	1.97917	STXBP6	4.95374e-05	1.59889				HSPB1	8.38233e-164	5.636	PXDN	5.04321e-13	2.7234	VASH1	0.0023343	2.29115	ASGR1	6.16091e-90	12.0147
74	TMEM229A	0	1.97329	LDLRAD3	6.47187e-05	1.70752				GM9885	8.2988e-162	14.5958	DCLK1	7.04038e-13	1.95301	MB21D2	0.00236547	1.63572	LGALS3	3.5532e-89	30.9401
75	BAMBI	0	1.96155	FXYD5	7.10553e-05	1.58993				FXYD1	1.0606e-159	1.879	NTRK2	2.33615e-12	1.84008	GM15063	0.00266703	1.80862	TEAD4	1.21808e-87	4.53633
76	SQLE	0	1.94067	GRIA2	9.26416e-05	2.40695				L1CAM	1.55074e-157	4.30633	PCDH10	2.60542e-12	2.29136	OVGP1	0.00323804	1.73954	NFASC	1.1989e-86	12.8381
77	MVK	0	1.93158	GM12207	0.000142614	1.83339				NGFR	5.36916e-152	4.87272	HEY2	3.06947e-12	2.10015	SLC35F4	0.00387071	1.62445	ARHGAP22	3.00266e-85	11.7513
78	DHCR7	0	1.90004	SERPINB1A	0.00018081	2.38645				OTUD1	1.78079e-150	6.96106	DYSF	3.19453e-12	2.58924	LRRC23	0.00390316	1.53926	SRXN1	4.25759e-85	8.91882
79	SC5D	0	1.88348	DEPDC7	0.000221212	1.74042				LBH	2.29761e-150	3.93889	ACSS2	3.4521e-12	1.98331	FAM71A	0.00466954	1.69341	C1QL3	5.89337e-85	11.9518
80	HEY2	0	1.8694	BTBD16	0.000237777	2.00726				EPHX2	9.21977e-148	7.96285	MTSS1L	4.71861e-12	2.20687	FOXP2	0.00487578	1.5543	TMEM202	2.37759e-82	9.31259
81	MEST	0	1.86376	BCL7A	0.000280164	1.58506				RARRES2	1.23411e-144	2.42339	SULF1	6.62234e-12	2.49888	ARHGEF19	0.00531498	1.53722	4931413I07RIK	6.72464e-79	11.5356
82	CYP51	0	1.84714	HSPA1A	0.000291954	1.75887				WWP1	1.18113e-141	6.20484	0610007P14RIK	1.1312e-11	2.09955	CAPN12	0.00550843	1.63985	TGFBI	4.50422e-78	17.95
83	APOE	0	1.84383	LRRC75A	0.000293641	1.84721				EPB4.1L4B	7.43892e-137	5.55977	IDI1	1.27643e-11	1.74673	GM16136	0.00601676	2.24204	ANKRD13B	1.62508e-77	8.38374
84	ENO1	0	1.84094	2410006H16RIK	0.000294032	1.61912				AEBP1	1.13105e-136	4.41471	ABCG3	2.00141e-11	2.06727	TSPAN2	0.00720721	1.67889	RAI14	4.60057e-76	14.4644
85	CDH11	0	1.83598	HBA-A2	0.000299788	3.48835				MATN2	1.35144e-133	2.57545	IGFBP5	2.37072e-11	2.12328	HIST2H3C2	0.00736881	1.68907	ECSCR	5.18285e-76	10.7416
86	0610007P14RIK	0	1.83293	TRBC1	0.000308051	1.59149				DHRS3	3.47575e-133	7.0975	LGR4	4.09503e-11	2.03087	NDP	0.00844609	1.7354	EVI2A	1.75439e-75	14.9535
87	SLC12A2	0	1.83276	EMID1	0.000317235	1.52063				ZBP1	1.01107e-131	8.19881	ELOVL5	6.37545e-11	1.83625	KCNA2	0.00984187	1.72867	GCH1	1.33374e-73	11.2484
88	CTSK	0	1.82819	NREP	0.000342655	1.6934				STBD1	3.79295e-130	7.3307	TEX40	8.91163e-11	1.91145	NREP	0.0124486	1.69221	KCNF1	1.71122e-73	2.71513
89	E130114P18RIK	0	1.80947	MFAP2	0.000371401	1.50858				CSRP1	3.13361e-128	2.35959	LSS	9.6265e-11	2.49356	HCN1	0.0133573	1.72188	ACSL5	1.39287e-71	6.08444
90	NKAIN4	0	1.79009	WASF1	0.000386514	1.88012				LGI1	5.42803e-127	5.59863	JAM2	1.3037e-10	1.89641	CCDC69	0.0144794	1.72715	GADD45A	2.4473e-71	9.3844
91	VAMP5	0	1.78915	ARHGAP11A	0.000395079	1.59885				RAB32	6.07292e-127	6.22342	ZDHHC2	1.3396e-10	1.9395	XYLT1	0.0153406	1.70935	2019-03-10	6.54732e-69	3.72186
92	SDC3	0	1.78639	PVT1	0.0004509	1.56827				RP24-131B6.1	1.04797e-126	14.2994	COL14A1	2.07601e-10	2.31892	BSPRY	0.0204928	1.86896	IGF2BP2	6.7432e-69	7.80595
93	ST3GAL4	0	1.7854	CAR12	0.000541848	2.07479				RELN	1.22316e-123	5.61226	NOTCH1	2.19311e-10	2.08004	TTC25	0.0211501	1.58032	SLC16A11	3.84248e-68	22.9533
94	FDFT1	0	1.7776	STARD5	0.000611357	1.69895				NRP2	1.43435e-117	4.74352	LECT1	3.89814e-10	1.73396	GM7120	0.021783	1.69212	STXBP6	5.3905e-68	5.98771
95	CIB1	0	1.76852	CXCL14	0.000671768	1.82104				ANXA5	2.43987e-117	2.4387	TPCN1	4.52318e-10	2.36047	GM23027	0.0219037	1.78115	EMP1	2.33233e-67	4.41174
96	DCLK1	0	1.75925	HBB-BT	0.000698164	2.61315				PTK2	9.71689e-117	3.58052	JAG1	5.91841e-10	2.67208	ICAM5	0.0219383	1.72528	MUSTN1	7.83438e-67	9.48126
97	LSAMP	0	1.74684	BTLA	0.000781892	1.55081				IFI27L2A	2.81198e-115	4.83848	PLXNB2	6.7644e-10	2.16711	DNASE1L3	0.0223375	1.89757	FGF5	1.06113e-66	9.87237
98	FAM213A	0	1.7346	PRSS12	0.000815067	1.57827				PLAT	5.85909e-114	3.44572	SLC1A2	1.39716e-09	2.53371	1700047K16RIK	0.0227141	1.5353	SLC17A8	4.03891e-66	8.33674
99	TLCD1	0	1.73237	S100A4	0.000933908	1.50139				GAS7	8.04503e-114	2.41713	MAGED1	1.53688e-09	1.90337	ZFP125	0.0234873	2.04716	STARD5	2.18155e-65	5.8578
100	LECT1	0	1.72592	B3GNT6	0.000954368	1.7942				NKD2	3.16172e-111	10.4835	MACF1	2.01132e-09	2.30132	4930578M01RIK	0.0250406	1.50301	CDT1	1.76593e-63	10.436
101	HMGN3	0	1.72459	MLIP	0.000972318	1.625				GPNMB	9.66144e-111	4.75144	DOT1L	2.5805e-09	2.7737	B430203G13RIK	0.0273786	1.68422	4930506M07RIK	2.78823e-63	7.37233
102	PMVK	0	1.71472	GM8730	0.00107897	1.61423				PRRG4	3.14645e-109	10.2705	ADCYAP1R1	3.32477e-09	3.12244	GM15648	0.0276187	2.00992	VASN	3.74959e-63	9.95245
103	FBXO2	0	1.70337	BC065397	0.00114649	1.67669				MMP23	1.42288e-106	11.8883	CPQ	4.10728e-09	1.88724	GM21781	0.0312342	1.81164	LIMS2	2.76292e-62	6.49618
104	CSDC2	0	1.68238	RPL10-PS3	0.00118039	1.67743				FAM78B	1.71707e-104	10.704	PCDHGA12	4.18231e-09	2.04865	GRIK1	0.0334007	1.6719	LIF	3.26733e-62	6.64777
105	NTRK2	0	1.68041	KCNE4	0.0016771	1.57358				CNP	1.82379e-104	1.80323	LRP1	5.29134e-09	1.83395	GM13625	0.0352028	1.88727	SLC11A1	3.80248e-61	15.3614
106	FGFR1	0	1.64588	2410080I02RIK	0.00186455	2.23372				GBP2	1.27607e-102	5.13749	SCIMP	5.53179e-09	1.91799	GM12224	0.0371903	1.54185	AGPAT4	4.25195e-61	9.29115
107	SHISA4	0	1.63314	CCND3	0.00228468	1.8826				IFITM3	8.95723e-102	2.39332	TYRP1	6.02851e-09	1.77585	PSD2	0.0375185	1.50008	TMEM179	4.7757e-61	15.2625
108	KCNN4	0	1.62533	FOXO6	0.00295785	1.96229				SEMA7A	1.64705e-101	9.66097	MILR1	8.63768e-09	1.73191	SYNE4	0.0378929	1.60838	PI4K2B	6.0531e-59	5.85372
109	TEX40	0	1.62194	FUT4	0.00341116	1.57601				S100A10	5.8045e-100	3.0673	ASTN2	8.70179e-09	2.39161	FAM83F	0.0429233	1.67297	AKR1B8	7.60357e-57	7.37708
110	ME1	0	1.61171	CDC45	0.00347328	1.70381				DNM3	6.06863e-100	6.17312	CDH15	1.24852e-08	2.5199	LYPD6	0.045864	1.94419	TUBB6	8.89853e-56	5.17656
111	PTPRZ1	0	1.6031	GPATCH4	0.00402526	1.64339				CYS1	1.85856e-99	6.18477	IFITM6	1.58701e-08	1.51279	UBXN11	0.0486482	1.55774	TIMP1	4.88748e-55	5.90317
112	SFXN1	0	1.60307	GM17638	0.00409017	1.54778				CHL1	3.28878e-98	3.00933	LRRC25	1.62338e-08	1.56787	VMN2R29	0.0521722	1.78777	ADAMTS4	5.24807e-55	9.58655
113	RSPH9	0	1.55495	DAB1	0.00460637	1.99103				C1S1	1.10181e-97	8.28622	SV2B	1.81433e-08	2.7392	AP3B2	0.054194	1.8149	LY6G6F	8.05716e-55	9.50439
114	ELOVL5	0	1.50012	BGN	0.00474401	1.50221				SYNM	1.19887e-97	8.05325	NKAIN4	2.07773e-08	1.72317	YPEL4	0.0548433	2.14862	EXOC3L4	1.95877e-54	8.51664
115	GPRC5C	4.9E-324	4.7607	FAP	0.00486303	1.82065				OLFML2B	3.66646e-96	3.40537	PGF	2.19981e-08	1.98761	RPGR	0.0553615	1.68265	EFCC1	2.52001e-54	5.31738
116	ACLY	4.9E-324	1.74935	1810011O10RIK	0.00504897	1.79186				C3	1.24254e-95	24.7236	TMEM245	2.31105e-08	2.29517	KLC3	0.0559621	1.52568	CADM3	1.2659e-53	9.44403
117	PMM1	1.0E-323	1.5158	PRX	0.00536968	1.67717				FOSB	4.08621e-94	8.15117	MAF	2.55915e-08	2.00151	CLDN11	0.0568724	1.66972	POLD4	3.13276e-53	5.52472
118	MSMO1	1.93E-322	1.62258	RIN2	0.00579188	1.61024				COL18A1	4.51164e-93	4.65475	APC2	3.09308e-08	2.39617	PNMA2	0.0589464	1.70084	CORO1C	5.84493e-53	5.50247
119	NT5DC2	1.242225E-317	4.25527	PALMD	0.00656617	2.01574				MARCKS	5.77623e-93	2.4031	GRAMD4	3.67998e-08	2.39327	GRIN2D	0.0606462	1.62778	UCHL1	1.83048e-52	6.83881
120	ALPL	1.42502501E-315	2.58745	DLK2	0.00685163	1.66275				FAM89A	2.4355e-92	8.33684	NSDHL	3.95366e-08	1.73894	GM23645	0.0628113	1.5035	DUSP5	2.39743e-52	8.02712
121	SH3PXD2B	7.122149786E-315	1.69597	RP23-45G16.6	0.00712353	1.88103				IGSF21	1.20989e-91	13.4294	SLC13A3	4.19001e-08	2.63632	XLR3B	0.0640051	1.71548	NSUN2	2.56704e-52	4.80025
122	KCTD1	6.8486581174E-314	1.73374	FXYD3	0.00719503	1.54568				SLC9A3R2	2.11808e-91	3.89359	ACAT2	4.35461e-08	1.93183	6030442K20RIK	0.0675722	1.70273	STX3	6.02998e-52	10.5738
123	RBP1	1.79608826508E-313	1.63995	MATK	0.00725227	1.53488				CAPG	5.08298e-91	2.3634	ITGAV	5.24685e-08	1.74663	6720483E21RIK	0.073644	1.68045	PDGFA	4.84569e-51	3.41371
124	CYP4F14	4.9497131769E-313	3.58041	CUEDC2	0.00773671	1.65591				S100A6	4.27771e-89	1.76164	ITIH3	6.84682e-08	2.47592	NYAP1	0.074096	1.50211	MRAS	9.67664e-51	6.41513
125	PEA15A	8.18264028516E-313	1.57366	PDE8A	0.0082317	1.60407				ANXA1	1.9341e-88	9.8581	FAT1	6.85867e-08	2.20897	MFSD3	0.0746444	1.79111	FRZB	3.95446e-50	7.99267
126	RLBP1	4.9228483622045E-311	2.04001	RNF128	0.00848584	1.88323				FST	7.2113e-88	10.0212	AATK	7.86676e-08	1.73688	GM4353	0.0767295	1.6034	MLLT11	3.9836e-49	6.45204
127	S100A1	0	1.52888	ATP2A3	0.00990215	1.59383				NR4A2	1.133e-87	5.31774	ITGA8	1.5793e-07	2.28833	ZMYND12	0.0775959	1.55992	CYB5R2	5.46018e-48	5.33817
128	CPQ	1.67371e-307	1.64193	ZFP869	0.0100693	1.80677				H2-Q7	1.16773e-87	5.71669	CLSTN1	1.79172e-07	1.8758	GM20522	0.0789394	1.61766	1110007C09RIK	1.91095e-47	4.16851
129	PON2	2.21137e-305	1.51165	1700023H06RIK	0.0104391	1.51334				IQGAP2	4.72311e-87	4.25759	OPLAH	2.07302e-07	2.28966	GM2885	0.081608	1.70264	UCK2	2.94128e-47	5.93347
130	CDH1	2.23109e-302	1.83516	EPHB1	0.0105063	2.00834				SEMA6D	4.76799e-87	5.44023	LAMC1	2.18332e-07	1.73416	PCDHB3	0.0835078	1.63638	SLIT2	3.0858e-46	7.27718
131	PTGES	2.99706e-298	2.49674	CHRM1	0.0106216	1.56453				TGFB1I1	6.92554e-85	4.37571	IRS1	2.44084e-07	2.73779	MYT1L	0.0904339	1.50674	CRABP2	5.09534e-46	23.0062
132	LSM6	2.65461e-295	1.50642	RPL13-PS3	0.0108836	1.54156				BTG2	5.95639e-84	5.92144	LIFR	2.51298e-07	2.06277	2810429I04RIK	0.100978	1.92594	NBL1	1.13015e-45	5.96979
133	CRYBB1	1.45099e-294	3.91228	LRRTM2	0.0121419	1.67172				CDH19	1.35081e-83	2.41112	ATP2A2	2.68163e-07	2.02611	GM26225	0.10339	1.51019	AHNAK2	1.55605e-45	4.24994
134	ITGA7	6.458e-292	1.64523	STAC2	0.0126356	1.72127				GFAP	5.42123e-82	3.55386	AGT	2.72266e-07	2.03894	RUNDC3A	0.103788	1.63369	ADA	1.87106e-45	8.74656
135	LCAT	8.9806e-291	2.28003	KLRB1A	0.0127958	1.95686				RNASE4	8.27464e-82	6.13572	FASN	3.43162e-07	1.98211	GM7628	0.105705	1.79536	HMOX1	2.13939e-45	6.20067
136	GRAMD1B	5.04841e-290	1.66575	SASS6	0.0131065	1.56545				CWH43	8.81562e-82	9.73398	ARHGEF6	3.57417e-07	2.06516	CKM	0.106384	1.58443	SRM	2.8497e-45	4.34288
137	GPM6A	1.43525e-289	1.79989	CAPN9	0.0133595	1.87359				F3	9.83041e-81	3.34299	NUAK1	3.72067e-07	2.50409	LRRC52	0.109084	1.52332	P2RY2	5.0335e-45	6.7802
138	TTYH1	4.81726e-289	1.52443	GM17056	0.0142768	1.65673				ARPC1B	1.31161e-80	1.51805	FDFT1	4.2723e-07	1.62715	AHCY	0.110783	1.51618	VAT1	7.40043e-45	4.93295
139	LIFR	8.83915e-285	1.97915	POLE2	0.0169637	1.65175				STK32A	1.70757e-80	7.33537	2810055G20RIK	5.2602e-07	1.73599	SNX22	0.112011	1.66474	EIF4EBP1	4.4982e-44	3.88737
140	CYP4F15	2.22217e-284	3.22867	PELI2	0.0214128	1.75163				ART3	2.38138e-79	1.76854	CSPG5	6.05706e-07	2.03869	WDR38	0.112859	1.62543	AEBP1	5.2083e-44	5.10011
141	GCSH	1.22643e-283	1.50748	TRMT10A	0.0214207	1.77709				IFIT3	1.42241e-77	4.98547	OLFML2A	6.44804e-07	1.89415	CDKL5	0.113832	1.55551	CRLF1	9.80835e-44	5.18679
142	SLC1A3	7.80051e-281	1.7956	EIF3M	0.0242611	1.57957				TSPO	1.66283e-77	2.45403	TMEM132A	6.84897e-07	2.03069	FAM185A	0.116187	1.62625	ME2	2.26874e-43	6.26777
143	MYO10	1.02476e-280	1.73181	PEO1	0.0251904	1.66036				CHD5	6.11914e-76	9.11345	CYP4F15	7.31522e-07	2.27239	AI317395	0.120451	1.53213	CRYAB	2.64278e-43	5.41596
144	GSTT1	1.66322e-280	1.53891	UCN2	0.0259987	2.01295				AKAP12	3.08379e-75	4.06553	LDLR	1.04354e-06	1.93352	FBXL7	0.122103	1.62837	BHLHE22	5.97772e-43	6.38417
145	2019-09-09	5.36855e-279	1.52096	CEACAM1	0.0273097	1.74234				HSPG2	5.22006e-74	2.88027	2310022B05RIK	1.40265e-06	1.71722	KLHL11	0.12517	1.68321	E2F1	2.00917e-42	7.09855
146	MIF	3.28888e-277	1.60208	GM15893	0.0322734	1.60613				YBX3	1.628e-73	2.82504	BAI3	1.65299e-06	2.00614	KIFC2	0.127288	1.54387	BCAT2	2.27912e-42	4.13046
147	APOC1	7.03343e-274	2.75721	STAMOS	0.0335998	1.70168				CXXC5	3.10164e-73	3.36356	TNXB	1.67079e-06	2.32527	HSD17B14	0.130705	1.51262	TFRC	2.80664e-42	6.21926
148	LUM	2.47989e-272	1.8026	BFSP1	0.0348444	1.58612				BHLHE22	4.43316e-73	8.80244	DCBLD2	1.69898e-06	2.29663	SUSD4	0.131402	1.62347	MTHFD1L	1.51367e-41	6.05213
149	IL25	1.1353e-271	3.69056	E130215H24RIK	0.0366379	1.80409				2310002F09RIK	1.13005e-72	10.6268	KCNJ10	2.16635e-06	1.86448	DUSP8	0.134623	1.50235	ANGPTL2	3.69957e-41	4.21959
150	RND2	2.19765e-269	1.70918	GM2000	0.0380299	1.53307				COL1A2	1.16702e-72	2.42124	PHLDA2	2.33176e-06	2.46279	3110057O12RIK	0.138972	1.63407	TPM1	5.25669e-41	4.53938
151	IGFBP5	1.60118e-268	1.90979	BMPER	0.0394669	1.83577				SOCS3	2.47151e-72	3.95175	INSIG1	2.3748e-06	1.80303	DNPH1	0.139771	1.67408	SEC1	5.27028e-41	9.1369
152	VWC2	3.48528e-267	2.06836	FAM222A	0.0408132	1.51556				PCDH11X	2.83918e-72	9.4462	SPON1	2.6219e-06	2.07316	ZFP445	0.141869	1.53858	ANXA3	1.33078e-40	7.56797
153	EHD3	8.13989e-266	1.81808	ANKRD13B	0.0431375	1.56547				CASP4	3.65748e-72	4.97941	COL5A3	2.66502e-06	1.99225	2210008F06RIK	0.146863	1.56425	TMEM59L	1.55922e-40	6.64929
154	PITPNC1	2.24062e-265	2.53239	KCNQ1OT1	0.0461995	1.63304				SLC10A6	8.73825e-72	9.9611	COL4A6	2.66787e-06	1.58999	4930563E22RIK	0.150884	1.57235	PLEKHA1	3.03425e-39	3.9655
155	CRIP1	3.64854e-265	1.72727	GM26724	0.0474387	1.61004				MGARP	1.9103e-71	11.1027	HEYL	3.06978e-06	2.04913	5033403F01RIK	0.151301	1.51731	RARS	1.76644e-38	4.02913
156	SMIM4	1.32056e-264	1.88478	CACNA1A	0.047809	1.69048				DEPTOR	2.14329e-71	3.5142	GPAM	3.74186e-06	2.37978	PELI3	0.153344	1.6069	MRPS18B	2.16341e-38	3.7795
157	1190002N15RIK	2.51101e-264	2.10922	MIR1931	0.0504812	1.53054				PPFIBP2	2.18927e-71	5.0189	LRRC4B	3.87612e-06	2.03585	1110035H17RIK	0.158994	1.71424	RUNX2	2.54337e-38	5.77129
158	EPB4.1L2	4.54967e-264	1.65364	CBX2	0.0513249	1.6474				TAGLN2	3.59873e-71	2.14799	SLC1A5	3.97965e-06	1.58321	6230400D17RIK	0.16421	1.57523	ANXA7	3.99398e-38	3.85609
159	SLCO3A1	8.98748e-263	1.73098	GM16152	0.0539056	1.64733				SERPIND1	4.95531e-71	10.3827	NRCAM	3.99365e-06	2.30399	FTX	0.165169	1.58704	SMURF1	4.01695e-38	5.2524
160	AIF1L	1.39884e-259	1.80557	FYN	0.0540957	1.63064				TMEM140	1.12733e-70	3.28573	SETD7	4.14865e-06	2.15799	IL12RB1	0.167393	1.63377	DYNC1LI1	4.7357e-38	4.13533
161	SPEG	5.18733e-253	2.27086	GM10371	0.0555224	1.72061				COL16A1	2.45862e-70	2.95006	MVD	4.19107e-06	1.72524	2610020H08RIK	0.167994	1.56875	SCLY	5.28751e-38	5.13473
162	ECHDC1	8.16753e-250	1.55229	DUSP15	0.0564415	1.72354				G0S2	4.56425e-70	4.09135	ITPR3	4.28428e-06	2.01355	UTP14B	0.173076	1.57267	TSPAN4	5.98342e-38	3.07081
163	F11R	3.49366e-249	2.44717	AATF	0.056925	1.52812				PROS1	4.60194e-69	3.05296	SLC6A11	5.13689e-06	2.41484	KISS1R	0.173281	1.70448	MBOAT1	6.62915e-38	5.95066
164	PTGFRN	8.57845e-249	1.72955	RIT2	0.0572929	2.12627				PRNP	1.59354e-68	1.67075	ABCA1	5.49685e-06	2.00874	INA	0.186609	1.7528	LGALS1	8.08528e-38	7.2421
165	LMO1	3.1899e-247	1.59494	DCT	0.0578009	1.52844				EGR2	1.93862e-67	4.73563	PDPN	5.72192e-06	1.84352	ZFP960	0.195395	1.64274	LRRC59	9.74098e-38	3.60731
166	FUOM	1.63851e-245	1.72614	ESPN	0.0580356	1.72546				MPZ	3.0172e-67	2.24343	PDGFRB	5.92082e-06	2.38942	GM13012	0.21026	1.54996	ECM1	1.06312e-37	7.09406
167	SOCS2	4.25336e-245	1.8239	HIST4H4	0.0611826	1.51724				WBSCR17	6.77355e-67	4.23229	ZFP663	6.66121e-06	3.2572	CRTAC1	0.210706	1.75247	NES	1.19129e-37	5.31071
168	ADRA2C	8.69471e-245	2.26622	KCNH1	0.063334	1.53963				DUSP26	1.3986e-66	3.82677	MFSD2A	6.93781e-06	1.91205	ATXN7L2	0.219285	1.6654	SEMA5A	2.42078e-37	9.50204
169	CACNG4	4.28453e-244	2.81293	GM27010	0.0684455	1.60437				TMEM71	7.42584e-66	7.45765	ADAMTS18	6.97467e-06	3.26759	LGI3	0.223868	1.63924	TRMT61A	9.78297e-37	4.95755
170	JAG1	6.37339e-244	2.2162	GM15537	0.070722	1.51699				COL5A1	1.18541e-65	4.35624	ETNK1	7.01204e-06	1.86593	E530011L22RIK	0.223897	1.5221	ATF3	1.59362e-36	2.55298
171	MTSS1L	9.85809e-244	1.54523	LY6D	0.0723578	2.04485				OXTR	1.21231e-65	10.1157	NPC1	7.02932e-06	1.84822	GM9888	0.233373	1.59919	SLC35F6	1.98234e-36	5.4905
172	WFDC1	1.36121e-242	2.8834	GLRB	0.0755211	1.65007				THBD	1.26012e-65	8.9906	DDHD1	8.02118e-06	1.86911	GM7334	0.235327	2.04931	LIPA	2.63936e-36	5.28097
173	PEBP1	2.59369e-242	1.7426	SEC1	0.0756454	1.52253				SAP30BPOS	2.02605e-64	8.60399	1700016P03RIK	8.04339e-06	2.00513	BC055324	0.238398	1.83935	RHOU	2.97791e-36	5.62008
174	CST3	1.20059e-240	1.60032	PDE1C	0.08077	1.5034				ISLR	2.39588e-64	3.36654	GPR56	8.10012e-06	1.88608	2700012I20RIK	0.239988	1.63202	PPA1	3.45444e-36	3.41654
175	ALDH9A1	3.25743e-240	1.56209	TMEM27	0.0843519	1.85386				STARD13	3.17367e-64	2.85569	MAN2B1	8.90046e-06	1.97307	GM26562	0.248935	1.50966	LPCAT2	4.56643e-36	3.2968
176	HPDL	7.6336e-234	3.2452	BLOC1S6OS	0.0873079	1.65864				CSRNP1	1.69828e-63	5.86913	ZSWIM5	9.17751e-06	2.78397	PCDHB7	0.249422	1.51115	MRTO4	1.48892e-35	3.49642
177	COX7A1	1.09442e-233	2.34401	METRNL	0.0903376	1.52505				GAS2L3	1.70919e-63	3.01442	DST	1.00771e-05	1.75047	BEAN1	0.251384	1.5652	CAV2	4.55619e-35	4.01606
178	FNTB	1.92433e-233	1.84419	GABRR2	0.0907647	1.5634				LRRN2	1.57976e-62	4.58579	DHCR7	1.03221e-05	1.85239	SNCB	0.256529	1.51566	NR2C2AP	6.84433e-35	3.80262
179	AACS	2.84034e-232	1.77482	GM6133	0.0916602	1.85509				PTRF	2.1054e-62	3.62889	NCKAP1	1.4166e-05	1.89072	PCDHB11	0.258942	1.56644	RP24-458J4.2	8.81704e-35	2.614
180	DBNDD2	5.45019e-232	2.04343	RPS12-PS3	0.0918562	1.51435				LGI4	5.27879e-62	2.13703	KANK1	1.68666e-05	1.95332	DLEU7	0.26655	1.55737	CAPN2	1.04235e-34	4.18305
181	DPF3	1.97829e-228	4.25035	HIRIP3	0.0922946	1.57936				TNFSF9	1.06299e-61	8.11581	HCN2	1.70588e-05	2.37411	WNT9A	0.266587	1.54026	APOH	1.12613e-34	7.21676
182	TMEM121	2.24631e-228	1.64786	GM22743	0.0942434	1.69122				CSMD1	1.52221e-61	2.72251	PKD1	1.80925e-05	2.0458	RIMS2	0.277632	1.58937	S100A10	1.25331e-34	4.64856
183	SLC25A18	8.89535e-227	4.00208	KIF26B	0.0978867	1.62098				FLRT3	3.21848e-61	3.92121	MICAL2	1.82955e-05	2.11946	MAP2K6	0.294898	1.76008	TRIM47	1.34809e-34	6.11916
184	SCGB1A1	9.20863e-226	2.68639	GM26916	0.105552	1.50521				4930520O04RIK	9.49052e-61	9.73062	LAIR1	1.8332e-05	2.08537	GM11127	0.299621	1.58104	LRRC75A	2.18941e-34	6.24532
185	ABAT	5.61701e-223	1.80897	RBM19	0.11194	1.74626				JUN	1.01221e-60	2.41758	STT3B	1.86785e-05	1.89566	MRM1	0.310112	1.60496	VAT1L	3.54474e-34	4.49789
186	ZFP60	6.20852e-223	1.95899	LGALS7	0.113591	1.54498				CYR61	1.46209e-60	4.23195	C130071C03RIK	1.91418e-05	2.02927	GM9755	0.311321	1.75977	9530059O14RIK	6.31725e-34	6.19343
187	PTPLAD1	9.5906e-221	1.65754	USP3	0.118047	1.50957				CDH2	1.75771e-60	3.51117	TBX3OS1	2.01615e-05	1.82706	C1QL1	0.342245	1.61318	PDLIM7	9.95089e-34	3.78254
188	LFNG	3.10229e-220	2.80281	HHIP	0.11964	1.55787				PQLC3	1.03071e-59	4.58012	CKAP2L	2.12998e-05	2.06466	HOXD9	0.348855	1.69807	PPAP2A	1.27555e-33	4.67001
189	MMD2	2.80559e-218	1.60526	CCDC80	0.127388	1.58662				MPP7	5.05023e-59	6.06369	MGAT3	2.22198e-05	1.93109	CHP2	0.349942	1.67001	GM16096	1.4478e-33	2.28766
190	TCEAL3	3.8984e-218	1.8219	GM12927	0.127487	1.59852				IFI47	2.40829e-58	5.49376	FAM171B	2.26276e-05	1.72133	RWDD2B	0.357048	1.5955	FXYD6	2.06596e-33	5.5068
191	MACF1	4.8873e-218	1.96661	D930030I03RIK	0.128177	1.53462				PMP2	3.72793e-57	9.31733	PAPLN	2.36252e-05	2.83159	TPBG	0.362691	1.59769	SHB	4.89278e-33	5.40582
192	RTN1	2.29933e-217	1.57602	A430106G13RIK	0.129779	1.51205				EPB4.1L3	2.88347e-56	6.03443	GPR156	2.60188e-05	1.84791	PAQR9	0.376379	1.51336	1600002K03RIK	5.66507e-33	3.8865
193	SMIM1	5.22163e-215	1.98589	1500012F01RIK	0.132358	1.52483				PTPLAD2	6.38976e-56	8.77973	CASKIN2	2.60543e-05	1.89302	NUDT15	0.382456	1.73191	NCEH1	6.07651e-33	5.81154
194	SLC15A2	3.10431e-213	2.10267	ARHGAP10	0.135785	1.53723				SPIDR	1.16291e-55	5.96229	CLU	2.88596e-05	2.13098	PPP1R13L	0.391854	1.60122	PNO1	6.34861e-33	3.36251
195	SRPX	4.04909e-213	1.54053	GM26511	0.135858	1.62202				IL34	2.81068e-55	3.55989	ENPP2	3.74697e-05	2.2385	PLCXD2	0.393188	1.53736	MFAP5	1.07999e-32	8.46843
196	EHD1	1.71616e-211	1.79936	CAB39L	0.136861	1.51395				PNRC1	2.94158e-55	2.85562	DHCR24	3.78134e-05	1.90615	RFFL	0.415477	1.56759	AK6	1.69344e-32	3.55422
197	GSTM6	1.93922e-211	2.03179	EIF3L	0.147029	1.51931				SHPK	3.44904e-55	2.38167	CAT	3.8765e-05	1.84499	CNBD2	0.416467	1.68758	EIF2S1	1.96766e-32	3.3568
198	PCDH10	9.49496e-210	1.64687	WDR66	0.151663	1.55508				LAYN	4.23306e-55	5.41917	GPR125	3.97431e-05	2.11342	AMPD2	0.416782	1.50137	SETD8	2.04083e-32	3.97278
199	FADS2	1.86449e-209	1.63356	HIST3H2BA	0.15281	1.56913				TMEM123	5.6268e-55	2.96903	CYP4F14	4.43854e-05	1.95138	PCED1A	0.422876	1.54817	GGCT	2.21301e-32	6.15342
200	PANK3	2.62934e-209	1.81741	HIST1H4J	0.155101	1.64634				ABLIM1	1.7632e-54	4.89874	MYO10	4.80677e-05	1.87586	C730034F03RIK	0.440097	1.70025	RNF125	2.75979e-32	6.57806
201	BSG	1.84514e-208	1.61963	MPP6	0.159807	1.85047				SGCD	2.53691e-53	4.88827	UNC80	4.95433e-05	2.29607	HOMER2	0.445086	1.64924	VAMP5	4.23095e-32	5.55129
202	SCD2	6.91118e-208	1.51892	BRWD3	0.161745	1.5115				CHRDL1	3.0003e-52	8.42408	NRBP2	5.23944e-05	2.0136	GM26826	0.445319	1.5363	MAP2K3	6.04718e-32	3.75264
203	NPL	1.4267e-205	2.8517	SNAP91	0.162311	1.77419				EHBP1	4.43965e-52	3.87106	ALPL	5.6445e-05	1.94543	PCDHB12	0.449942	1.55295	4930455G09RIK	7.25991e-32	3.19083
204	CHIL1	1.3574e-201	2.91284	2210008F06RIK	0.165448	1.51602				IFIT1	4.47209e-52	4.68998	TRIM2	5.74626e-05	1.72682	KIF21B	0.457239	1.58303	ATP6V1B2	1.01462e-31	5.2274
205	CELSR2	1.72321e-201	1.66932	RAMP3	0.178037	1.57492				ADGB	1.63678e-51	8.86993	BC035044	5.95089e-05	1.56515	KCND1	0.460091	1.523	NPL	1.31225e-31	4.69329
206	4931406C07RIK	4.77466e-200	1.56083	MAP3K1	0.180221	1.55514				ATP8B1	1.027e-49	6.99885	TM7SF2	5.98934e-05	1.71876	CACNA1H	0.469364	1.54859	4632428C04RIK	2.81972e-31	5.55068
207	TRP53INP2	1.95291e-198	1.97805	GM15559	0.181292	1.53661				SMPD3	1.11561e-49	8.52001	ARHGAP28	6.2672e-05	2.64601	ZFP458	0.477988	1.68935	ESD	9.44003e-31	5.78717
208	TCF7L1	3.58627e-198	2.32373	TMEM117	0.182531	1.92666				KLK13	1.1291e-49	8.36263	RSPO1	6.83153e-05	1.88889	SIRT5	0.483288	1.55576	GALE	1.41996e-30	4.58157
209	PARD6G	8.86849e-198	1.55148	MED12	0.184081	1.75901				KCNK13	5.91562e-49	3.37868	D930016D06RIK	7.06701e-05	2.28506	F2R	0.49458	1.54931	EML1	1.61687e-30	3.55081
210	MEGF10	4.14178e-197	1.53259	TMA16	0.194044	1.50591				H2-K1	6.52689e-49	2.31499	VLDLR	7.75552e-05	1.826	GM17690	0.501539	1.54666	PRR7	1.95925e-30	4.44852
211	2019-09-04	1.86822e-193	2.21383	HNRNPA1	0.200363	1.55173				GGTA1	6.86595e-49	3.73276	FZD9	8.00155e-05	1.61273	LAG3	0.504178	1.55899	IL4RA	2.27345e-30	7.4159
212	KANK1	2.70815e-192	1.80556	KLHDC8A	0.202633	1.71417				NFKBIA	7.37765e-48	3.0037	SLITRK2	8.00852e-05	2.11137	2500004C02RIK	0.522005	1.52508	RRAS2	2.54174e-30	5.07813
213	GM11837	1.90996e-191	1.52716	CYTH3	0.206301	1.53579				CXCL12	1.60139e-47	4.80127	GM9938	8.22988e-05	2.03256	GAP43	0.547348	1.70671	SPOCK1	3.04183e-30	6.03759
214	GM19705	9.36652e-191	2.87335	CEP83	0.213925	1.57293				CXCL14	1.89808e-47	2.78586	PREX1	8.25754e-05	1.98232	SNTG2	0.552742	1.6398	BCL2L1	5.57492e-30	3.68217
215	TTC38	2.03549e-190	2.43174	THTPA	0.227174	1.50472				SNTA1	2.68184e-47	2.49924	ABCA2	8.39975e-05	2.01429	GM10501	0.553778	1.5421	NHP2	5.73528e-30	3.06223
216	KIT	3.84165e-190	1.74936	MUSK	0.241398	1.60836				SORBS2	3.89808e-47	2.96693	SC5D	8.53089e-05	1.67123	GM17056	0.578788	1.81314	SLC41A2	1.53037e-29	5.36139
217	STARD4	1.315e-185	1.76208	CPA3	0.242776	2.86137				GBP7	9.41557e-47	3.53551	FCNA	8.60043e-05	1.57425	TSKU	0.581983	1.51368	IL6RA	1.62594e-29	4.91744
218	GDPD2	4.62441e-185	2.98848	SRPK3	0.244582	1.50774				4833412C05RIK	2.3693e-46	6.96998	ANKRD50	8.8944e-05	2.07267	MPZL3	0.592768	1.67071	EEF1E1	1.80446e-29	3.57604
219	FNDC4	1.3743e-184	1.56366	FAM214A	0.260781	1.69336				ITM2A	2.70947e-46	2.19282	LRP5	9.66337e-05	1.98057	RP23-32C18.5	0.595185	1.97706	HARS	3.12776e-29	3.33901
220	PTPRG	3.1315e-184	2.52921	GM10827	0.267679	1.56371				ETL4	4.11492e-46	7.88594	A330076H08RIK	9.93384e-05	1.90882	GM10800	0.598303	1.56065	STX11	3.49169e-29	5.38149
221	USP2	1.64163e-183	1.67759	MIR5136	0.272112	1.51927				ANXA3	8.59804e-46	6.27127	SLC27A1	0.000100047	1.67777	LRRC56	0.612	1.52144	TMEM189	3.50001e-29	4.90446
222	FBXO44	5.54149e-182	1.5246	GM12580	0.272454	1.60307				ITPR1	1.488e-45	6.17635	FRAS1	0.000100881	2.47975	PIGW	0.625642	1.50719	METTL1	3.85716e-29	3.69729
223	RUNX1T1	6.36447e-181	2.43409	HIST1H2BG	0.291844	1.51738				TLE3	1.71413e-45	3.36286	PLXND1	0.000100993	1.80259	SLC26A6	0.632758	1.50911	TXNRD1	5.77697e-29	3.69922
224	SCN3B	3.74302e-179	1.83124	GM21971	0.292335	1.52077				METTL7A1	1.14338e-44	3.78052	YBX2	0.000104442	2.13003	EVPL	0.684178	1.5059	TBC1D9	6.95321e-29	4.35779
225	COL14A1	4.11999e-171	2.38211	GM13075	0.294251	1.65203				NEK6	1.24413e-44	3.24989	MMP8	0.000106528	1.61624	SYNC	0.685717	1.56024	FKBP11	7.26611e-29	10.5683
226	ETV4	2.80037e-169	2.67427	SEZ6	0.296223	1.55682				EPHB2	2.7759e-44	5.91363	AOAH	0.000108644	1.57197	RCOR2	0.690931	1.77668	ECE2	1.32518e-28	4.69188
227	KCNK2	1.37286e-167	1.98076	GM9869	0.298709	1.64779				KITL	1.39319e-43	5.94744	PTPRG	0.000110566	2.30205	PCNA-PS2	0.709345	2.03533	TLL1	1.74677e-28	2.37009
228	ABCG1	7.79512e-167	2.02019	DFNA5	0.299406	1.70946				TMSB10	1.88569e-43	2.16391	LCN2	0.000115036	1.79088	2600006K01RIK	0.732039	1.52127	SGSM1	3.70214e-28	5.44987
229	PTP4A3	2.59388e-164	1.61429	MMP8	0.31378	1.5181				PARP14	2.38213e-43	3.07879	DDX17	0.000119348	1.80532	ITGA10	0.74868	1.52154	UAP1L1	6.19926e-28	3.46001
230	ID1	8.61966e-162	1.70174	FBL	0.31557	1.53726				RHOB	2.42754e-43	2.70922	LMOD1	0.000135809	1.53465	SLC8A1	0.748788	1.61528	POU3F1	1.01302e-27	2.56484
231	PPARGC1A	2.01273e-161	1.56905	GM12216	0.331596	1.77973				RGS3	9.10247e-43	4.41002	CPXM2	0.00013723	1.57931	WDFY2	0.749385	1.57932	TNNI1	1.58677e-27	5.21723
232	PTPRT	8.40742e-160	1.60212	NOL10	0.33283	1.65627				SAT1	2.32471e-42	1.87989	PRTG	0.000154633	1.74201	LY6G6E	0.767221	2.17121	ORAI2	2.41382e-27	6.23178
233	KLHL13	3.53749e-157	1.57869	SAG	0.336567	1.744				CEBPB	7.58827e-42	4.32041	ITPKB	0.000167978	1.92832	TMEM220	0.771441	1.55923	CSRP2	3.93248e-27	8.67038
234	CAR13	1.96715e-156	1.85282	MAGIX	0.345013	1.57712				SPATA13	9.23727e-42	3.03939	ATP1B2	0.000171303	1.6037	BC052040	0.77754	1.55105	OAF	4.97567e-27	4.43933
235	CXCR4	5.36822e-156	2.11943	WDR90	0.346465	1.51937				REM1	2.39924e-41	6.8423	SLC12A9	0.000172667	1.79931	POLE2	0.784529	1.54557	SNHG6	5.64054e-27	3.61196
236	VEGFA	9.5865e-154	2.67564	GM9945	0.348361	1.54409				CPNE8	5.81367e-41	3.09279	TTYH1	0.000173925	1.65078	RASL10B	0.818159	1.52064	CHN1	6.73555e-27	4.49517
237	BC026585	1.13891e-153	1.62094	NIM1K	0.356893	1.52716				COL20A1	6.39408e-41	8.22374	P4HA3	0.000178108	1.79596	MYCL	0.819302	1.54507	ZFP593	7.04573e-27	4.09521
238	CLYBL	3.10294e-153	1.68707	GM20661	0.359899	1.54464				ENDOD1	1.34297e-40	2.68224	LIPG	0.000200144	2.68121	MIR6236	0.829407	1.52782	RIOK3	9.58374e-27	2.86449
239	VEGFB	7.92336e-152	1.68186	HOMER2	0.367803	1.54669				RND3	2.17978e-40	2.82063	WFDC1	0.000207943	1.82476	A330009N23RIK	0.833946	1.50912	DEB1	9.88143e-27	3.82396
240	TYRP1	1.80446e-149	1.98933	RPSA-PS10	0.368062	1.53404				WFDC13	5.85585e-40	6.82123	AI464131	0.000213788	1.90195	TUBA8	0.836703	1.59739	ANPEP	1.04717e-26	8.16378
241	ITSN1	2.17604e-149	1.5401	E530001K10RIK	0.376238	1.64496				IL1RAP	6.10674e-40	3.98232	ATXN2	0.000228993	1.84711	ATAD2B	0.845474	1.50283	GARS	1.17511e-26	2.8811
242	MAMDC2	3.8147e-148	1.74273	RPS26-PS1	0.386428	1.50446				VMN1R90	6.6542e-40	4.48813	MPDZ	0.00023303	1.77726	HIST2H4	0.895333	1.51486	DYNLT1A	1.9588e-26	8.05854
243	GALNT18	4.20827e-148	2.37835	GM10621	0.388731	1.51736				MBP	7.85494e-40	1.72575	GRIK3	0.000243124	1.78864	FBXL16	0.936314	1.53835	HYAL2	2.03388e-26	3.36329
244	GPC6	7.87501e-148	1.77329	FAM189A2	0.395817	1.56393				GLDN	1.37055e-39	4.74503	1100001G20RIK	0.000254033	1.86943	PCDHB19	0.943948	1.52618	PFKP	2.69518e-26	4.54208
245	NFE2L3	1.37204e-147	2.06335	GM6297	0.408152	1.53704				GJC1	3.3262e-39	5.03457	GM14005	0.000254109	2.05745	C2CD5	0.95047	1.51176	CTTN	3.15671e-26	2.68179
246	PHLPP1	2.18083e-147	1.658	MTMR2	0.41568	1.59548				JUNB	4.05646e-39	3.41335	RETNLG	0.000256382	1.52024	CERCAM	0.950898	1.53046	SPHK1	3.96317e-26	4.55033
247	ROM1	1.6505e-146	1.54711	COL9A2	0.421376	1.54726				UBE2L6	1.03139e-38	3.36185	CPEB2	0.000259296	2.10881	GM22063	0.952209	1.55274	YRDC	4.05874e-26	3.55111
248	2210408F21RIK	4.72249e-144	1.83127	4930570G19RIK	0.434364	1.56872				GBP5	1.21184e-38	6.10547	FGFRL1	0.000273816	1.92288	GM10392	0.959033	1.52363	HSPD1	6.31333e-26	3.03366
249	TMEM29	4.60084e-143	1.56313	1010001B22RIK	0.437446	1.55412				SDC4	1.68327e-38	2.33673	CAMP	0.000274817	1.53673	ZFP597	0.966384	1.53349	NUP43	7.47507e-26	4.97434
250	S1PR1	2.82082e-142	2.09739	TMEM38B	0.447171	1.66323				FOS	4.4813e-38	3.29753	BC005537	0.000275866	1.82618	1810034E14RIK	0.983656	1.55521	TMEM150A	8.32408e-26	3.47329
251	CASKIN2	1.018e-141	1.60516	AARSD1	0.508034	1.55534				TNFAIP8L1	1.13283e-37	3.64217	CHST3	0.000281632	2.03329	RNF180	0.986625	1.63563	CD24A	8.34061e-26	6.59783
252	MTCL1	1.84744e-141	2.22915	ANKUB1	0.535655	1.52771				CABP1	1.80739e-37	4.69667	SLC45A4	0.000286212	2.2179	GM7535	0.993055	1.56766	FARSB	1.01869e-25	3.13979
253	ELOVL2	2.47086e-141	1.95237	RASSF3	0.54175	1.57021				DUSP6	2.14929e-37	3.03446	ARL5B	0.000319386	1.95683				GRWD1	1.90049e-25	3.53093
254	RPIA	1.92952e-140	1.71473	CD27	0.564774	1.6274				H2-T23	3.48572e-37	5.42476	TEK	0.000322206	1.59439				RHD	2.71941e-25	3.30543
255	CD55	2.60709e-139	3.11169	IMPDH2	0.568961	1.52535				NRP1	3.9044e-37	3.1061	1700026J14RIK	0.000343853	2.07174				ITGA5	2.82141e-25	5.63875
256	SULF1	5.93816e-138	1.90798	ZSCAN12	0.579133	1.51528				FRAT2	1.54972e-36	4.82314	PSD4	0.00035543	1.59656				TMEM251	3.05192e-25	3.3527
257	TUBA1C	2.57396e-137	2.68448	ALAS2	0.582712	1.5857				LITAF	1.8382e-36	2.34765	PIK3R4	0.000359515	2.11605				MMGT2	3.28127e-25	4.18482
258	SLC13A3	1.14601e-136	2.76208	TTC25	0.585858	1.62331				TPST1	1.94492e-36	2.73753	EFCAB12	0.000361316	2.1318				FSCN1	3.63991e-25	2.92755
259	SEMA4A	7.94319e-136	1.8982	SMC5	0.608755	1.55289				GM13403	4.8433e-36	5.00468	ENO4	0.000417429	1.81383				GNPNAT1	3.90271e-25	3.32964
260	TPCN1	7.97154e-136	1.6749	GM5428	0.61956	1.50787				PRKCQ	1.11101e-35	4.2838	PKD2	0.000456731	1.79891				CMTM3	4.46604e-25	3.09935
261	IGFBP3	5.62634e-134	1.86098	H19	0.649035	1.5178				CADM1	1.35815e-35	1.6992	ACSL6	0.000459842	2.24927				CFL2	7.87988e-25	2.93114
262	SH3BGR	1.0929e-132	2.63655	FANCC	0.657132	1.62225				GULP1	7.34557e-35	2.70282	SLC5A11	0.000474062	1.89089				ITGA2B	8.2415e-25	8.8163
263	UPP1	5.84608e-132	2.63225	SLC6A15	0.687284	1.63401				PSMB8	1.71761e-34	2.62016	DDR2	0.000509155	2.0823				DAP	1.51147e-24	2.16561
264	SLITRK2	9.3003e-132	1.56753	TPSB2	0.698411	9.93715				SLC35F1	1.75446e-34	2.39174	MAN1C1	0.000528487	2.05438				RPF2	1.65897e-24	3.47127
265	UNC80	1.30997e-130	1.89322	BDH1	0.701394	1.58422				LRRC8C	2.76315e-34	3.30738	ACOT11	0.000531717	1.9254				ETF1	1.82652e-24	2.97236
266	GSTA1	1.34505e-129	2.1773	4932438H23RIK	0.724509	1.91664				PHF11D	6.49181e-34	6.72417	RAD51AP2	0.000538861	2.28293				CD63	2.43668e-24	2.61886
267	TMEM40	4.79964e-129	2.46882	FBP2	0.727409	1.52668				PHLDA3	1.06393e-33	2.2074	PLCD4	0.000541678	2.47898				ENDOD1	2.76827e-24	3.72423
268	CDK6	5.75071e-129	1.77293	NUPR1L	0.733924	1.72192				GAP43	1.09411e-33	3.46828	HMHA1	0.000544556	1.85656				CHRNA1	2.95789e-24	11.8681
269	ACSL6	8.93261e-129	2.16799	EZR	0.754976	1.56436				LHFPL2	1.56025e-33	2.62525	CNOT1	0.000570079	1.80217				PTER	2.98644e-24	4.53382
270	SMCO4	3.43187e-128	1.57311	GM26205	0.779378	1.53944				SOSTDC1	1.7451e-33	1.68902	ZFP60	0.000571927	1.87015				CCT2	3.62104e-24	2.84482
271	2019-09-11	2.83729e-127	1.72328	FBP1	0.787165	1.53226				FLNC	1.79199e-33	5.51062	NFE2L3	0.000581958	2.00546				1700012B09RIK	4.12682e-24	4.72818
272	SRGN	6.96035e-126	1.7255	RN7SK	0.807327	1.64674				PLP2	1.816e-33	2.51842	EPB4.1L2	0.000590046	1.68228				PGM3	5.34884e-24	3.39236
273	KCNJ16	2.05554e-124	2.01694	LOH12CR1	0.82091	1.52103				SH2D4A	3.54381e-33	6.00049	SNED1	0.000594614	1.80421				SEC11C	6.03725e-24	5.14596
274	OSGIN2	2.27403e-124	1.65312	CMA1	0.937669	5.76042				RIAN	6.0033e-33	3.92867	KBTBD7	0.000600374	2.51433				WDR4	7.58627e-24	4.20701
275	PROCA1	2.28302e-124	1.64951	CHGB	0.965104	1.51964				FBXL2	8.094e-33	5.39121	BAI1	0.000606141	1.85846				PLLP	9.12098e-24	3.31516
276	CRISPLD1	2.93875e-124	2.97225	SEMA3D	0.968334	1.64874				NFASC	1.59729e-32	6.2426	TMEM259	0.000609009	1.80709				EIF2B3	1.02209e-23	3.50362
277	ECHDC2	9.12401e-124	1.59529							SLC43A1	2.73848e-32	5.95518	PLXNA1	0.000616151	1.95046				NUP37	1.05604e-23	4.34847
278	MIA	2.99491e-123	4.2843							C1QTNF1	4.61208e-32	4.30976	RDH5	0.000652239	1.61475				WDR46	1.54785e-23	2.91554
279	CTXN1	8.05518e-123	1.62079							AFAP1L1	5.94014e-32	5.62778	CLSTN3	0.000712691	1.84933				DPY19L1	1.62277e-23	3.61445
280	LRP4	1.2847e-122	2.23582							IRF7	7.05455e-32	4.8417	CLASP1	0.00072479	1.64185				NOP56	2.17399e-23	3.09795
281	ADAMTS15	5.3051e-122	2.67672							SNX7	1.04175e-31	2.66713	SRCIN1	0.00072662	2.07675				IL34	3.80545e-23	3.11279
282	MAPK4	4.93737e-121	2.13234							FSTL1	1.24754e-31	2.64412	P2RY14	0.000728714	1.5699				PLEKHO1	4.03629e-23	3.58065
283	GGACT	5.64586e-121	1.64286							TMOD1	1.71889e-31	3.77238	DOCK10	0.000769417	1.8384				KIF3C	5.33787e-23	4.15801
284	EXT1	2.00893e-119	1.65503							SEMA4F	1.81602e-31	5.10506	SMOC1	0.000824227	1.97889				SDF2L1	6.92046e-23	1.9072
285	MGAT3	9.62397e-119	1.56302							CAR10	2.92741e-31	5.6241	COLEC12	0.000851742	1.70175				SLC37A1	6.97769e-23	4.89693
286	CYBRD1	4.17838e-117	1.71428							B3GALT2	3.1156e-31	6.20272	SEC16B	0.000898002	1.70449				ITGA7	7.31315e-23	4.65529
287	MTFP1	4.13341e-116	1.57647							AKR1B8	3.91624e-31	4.21313	CD300LD	0.000907732	2.0087				DDX39	7.75341e-23	3.06114
288	ASTN2	1.34112e-115	1.723							RSU1	4.23922e-31	1.98267	MCEMP1	0.00096002	1.50865				AIMP2	8.35331e-23	2.92759
289	HCN2	1.19841e-114	2.54187							FAS	4.42013e-31	4.25538	STARD9	0.000983907	1.84801				PLP2	8.69465e-23	2.21578
290	ANK2	5.36297e-114	1.96118							SLC31A2	5.18413e-31	2.17063	RNF24	0.000985354	1.89765				STAM2	9.82809e-23	4.12442
291	NRXN2	4.27775e-112	4.32358							HSPB2	1.85582e-30	2.62372	PVRL1	0.000988231	1.98786				FRMD8	1.1009e-22	3.11447
292	GRID1	1.2788e-110	1.62254							PAX3	2.04734e-30	5.56041	PTPRF	0.00102108	1.60349				SERP2	1.13914e-22	4.5375
293	0610040J01RIK	1.40934e-110	1.56546							CLDN11	2.16326e-30	3.83587	SEMA4B	0.00105879	1.88149				TMEM40	1.2017e-22	5.02619
294	SLC25A33	1.45584e-110	1.70322							PREX2	5.05649e-30	2.46892	FLNA	0.00106768	1.61916				PRMT7	1.80038e-22	3.0525
295	SLC1A2	2.02339e-110	2.23492							ADAMTS2	6.30636e-30	4.5916	RNF138RT1	0.00108307	1.69708				SHROOM3	2.63828e-22	4.66135
296	CIB2	2.64428e-109	1.51237							JPH4	8.30051e-30	4.58633	PCNXL3	0.00110812	1.83902				ZNRF1	3.53604e-22	3.29606
297	FOLH1	5.97926e-109	1.7149							VAT1L	1.00885e-29	4.71238	LTBP2	0.00111453	2.51156				GSPT1	3.65005e-22	2.36138
298	TEKT5	1.08789e-108	1.98284							CLCA2	1.11054e-29	6.56919	KCNN4	0.00115158	1.69622				LTV1	4.12006e-22	3.24846
299	PLEKHG2	1.74874e-108	1.78074							H2-M3	1.52032e-29	3.57121	RAPSN	0.00117962	1.74128				RPS18-PS3	5.04361e-22	3.82315
300	TRF	1.79287e-108	1.89946							UCN2	2.20118e-29	3.21947	STK36	0.00119578	2.48724				5031439G07RIK	5.19406e-22	3.485
301	RIPK4	2.19198e-108	2.25974							SFRP1	3.46844e-29	2.74605	IRF2BP2	0.00120558	2.06225				FITM2	5.33913e-22	4.46759
302	EVA1A	1.14633e-107	1.79858							GBP6	5.12878e-29	4.03818	GPR171	0.00121707	1.67743				LAP3	5.5694e-22	2.96389
303	PANK1	1.80414e-107	1.58806							YWHAH	5.42752e-29	2.20943	CMTM4	0.00121847	1.67782				MLKL	5.57502e-22	7.32964
304	ALDH1L1	3.217e-107	2.30272							HES1	7.91052e-29	2.56994	ST5	0.00125478	1.78734				TPD52	1.19931e-21	1.9356
305	SFXN5	1.87907e-106	1.73153							AHNAK	1.51721e-28	2.23113	CD84	0.00126423	1.54304				ABHD5	1.52701e-21	2.4164
306	FHDC1	4.27791e-106	1.59258							SIPA1L2	1.82405e-28	3.21462	CKAP2	0.00129591	1.71518				RASSF1	1.57673e-21	3.42979
307	SMOC1	5.36097e-105	1.78785							FOXO1	2.8995e-28	2.49845	PCYT2	0.0013201	1.65481				RBM3	2.49154e-21	3.19998
308	KIF1C	1.65487e-102	1.6453							ASPA	3.51949e-28	1.65417	ANKRD17	0.00133636	1.78588				TCP1	2.99412e-21	2.1666
309	4930444P10RIK	2.90162e-102	3.22597							CADM3	4.63939e-28	3.66205	PLXNB1	0.00134437	1.84796				GM22	3.49585e-21	5.81807
310	SEMA6A	1.27411e-101	1.577							H2-Q6	4.9227e-28	5.23919	ABCA7	0.00134732	2.0501				FBL	3.82933e-21	2.24696
311	LPAR3	2.02289e-101	3.74933							PPIP5K2	5.21413e-28	3.94152	CCDC157	0.00138373	1.93115				PRKAR1B	3.90802e-21	5.56817
312	TIFA	2.34945e-101	1.93344							ITGA6	5.32271e-28	2.65123	TNS4	0.00139881	1.65714				APBA2	4.24553e-21	4.64907
313	TMEM180	2.84629e-101	1.78316							MET	5.79988e-28	5.0583	COL26A1	0.00141224	1.80854				LYAR	4.9728e-21	2.94044
314	FAM69A	5.19978e-101	1.61315							ITGA4	6.48719e-28	5.45131	ABCG1	0.00146679	2.07652				FBLIM1	5.99909e-21	9.58994
315	TMEM100	3.26839e-100	2.55856							CCDC109B	1.14787e-27	3.60948	SPINT2	0.00151387	1.70056				KCNAB1	6.19168e-21	5.82688
316	SLC6A11	5.74004e-100	2.14204							VCAM1	2.08131e-27	3.36456	ARVCF	0.00151565	1.65541				POMGNT1	6.71463e-21	3.07584
317	NUAK1	7.56611e-100	2.32707							FOXD2OS	2.99785e-27	4.05777	POU2F3	0.00152867	1.702				FDX1L	6.93815e-21	2.71839
318	ANKRD50	2.37111e-99	1.51147							GM26569	6.07016e-27	5.61766	2019-09-11	0.00156747	1.76437				TBCC	7.91259e-21	3.20767
319	ARMCX6	1.65154e-98	1.80613							COL5A2	1.54156e-26	2.36636	FZD6	0.00157626	2.71046				ATP1A1	7.93258e-21	2.81164
320	ZFP663	5.39917e-98	3.9413							TNFRSF12A	3.07676e-26	1.9317	NR6A1	0.00157767	2.26798				CCT3	8.66667e-21	2.59064
321	COX4I2	2.08074e-97	2.10524							HDAC7	3.21757e-26	4.4378	ELMO3	0.00158931	2.11799				TOMM20	1.31438e-20	3.38122
322	BMP7	3.08386e-97	1.96532							PNP	3.61903e-26	3.92724	CELSR2	0.00174977	1.7664				TXN1	1.60706e-20	3.29249
323	COL8A1	1.30957e-96	1.72423							FRMD5	3.90799e-26	4.30347	RP23-329F7.2	0.00184204	1.56557				FADS3	1.6439e-20	3.00479
324	ACVR2A	1.98384e-96	1.68355							FOSL2	7.94695e-26	3.93151	PAG1	0.00185839	2.00177				YARS	1.81694e-20	3.06129
325	NUDT14	2.38115e-96	1.55488							TIMP1	8.57459e-26	2.67455	SCN4B	0.00197187	1.62201				YWHAH	1.87681e-20	2.30943
326	RAB15	3.2864e-96	3.6302							LOXL2	1.12593e-25	4.52219	GMPR	0.00198597	1.76491				TMEM120A	2.09526e-20	2.70007
327	CALR4	4.60439e-96	2.47135							PCOLCE	1.93068e-25	2.39394	FOXK1	0.00198848	1.88645				MYO1B	2.30649e-20	4.67008
328	LACC1	7.52898e-96	1.5485							TPD52	2.52538e-25	2.23892	CRISPLD1	0.0019929	2.50784				CCT4	2.80925e-20	2.01219
329	CTF1	3.85222e-95	2.14519							VMP1	3.53014e-25	3.19254	LPHN1	0.00200866	2.08677				MINA	3.08207e-20	3.55331
330	ADCY2	1.04085e-94	1.77703							NPR3	3.67124e-25	5.27717	5330434G04RIK	0.00202675	2.03878				TOMM40	3.184e-20	2.31069
331	AW011738	2.10746e-94	2.42636							DOCK11	3.73327e-25	4.57375	NLRP1B	0.00202916	1.67531				RRP7A	3.22121e-20	2.69001
332	A330048O09RIK	6.14212e-94	3.1795							UTRN	7.56841e-25	2.27598	IGF1	0.00208696	1.74484				FYB	3.36133e-20	3.03089
333	FAM107A	1.84251e-93	1.59617							ZFP36L1	1.01503e-24	2.46135	WTIP	0.0020915	1.77166				NME1	3.42529e-20	2.92032
334	ANKS1B	2.74795e-92	1.54914							ZFYVE28	1.07395e-24	4.73584	IGDCC4	0.00214379	2.49612				NEDD4L	3.82151e-20	4.6125
335	SLC25A13	3.10177e-92	1.93723							PIEZO2	1.96053e-24	4.63464	ABLIM2	0.00215843	2.41849				PVT1	4.00496e-20	5.99869
336	ADAMTS17	1.11662e-91	1.50931							GM26532	2.34469e-24	3.91984	FAM120A	0.00219545	1.75506				ARHGDIG	4.85127e-20	6.7114
337	TMEM56	1.33059e-91	1.86257							MAL	3.24386e-24	1.78415	PCX	0.00220058	1.78232				NPM3	5.11856e-20	2.8381
338	ENTPD1	1.82753e-91	1.67681							HSPA12B	5.30418e-24	5.18162	POSTN	0.00229565	1.62278				EIF4A1	5.40688e-20	3.99276
339	ETV5	6.76239e-91	1.71116							BAIAP2	6.27883e-24	2.25177	MEGF10	0.00230154	1.73				CLN5	5.93303e-20	2.81911
340	GJB2	6.34931e-90	2.8223							PCDH9	1.02788e-23	2.80884	PDE3B	0.00230866	1.93293				KLK10	6.36226e-20	5.4851
341	GSTT3	2.06869e-89	1.70542							ARRDC4	1.41634e-23	4.25605	PTPN13	0.00235307	1.87744				TBL3	7.68318e-20	3.36848
342	CTDSPL	5.96804e-89	1.6019							CCDC113	1.59283e-23	2.20099	MT-ND4L	0.00238519	1.62545				NOP58	8.36887e-20	2.98305
343	PDGFRB	7.35936e-89	1.83427							MKI67	1.64383e-23	6.51679	GM26853	0.00239807	2.69398				ADAM9	9.22709e-20	2.62259
344	RAB21	1.29014e-88	1.50761							BCL2L1	1.86636e-23	2.66852	CPEB4	0.00243006	2.05715				KPNB1	9.23282e-20	2.59352
345	RAPSN	1.4385e-88	2.60284							IFITM2	1.88143e-23	1.79958	PFKFB2	0.00246827	2.05839				LYPLA2	1.00189e-19	2.79535
346	EHF	3.21335e-86	3.11681							HBEGF	2.14529e-23	2.31708	GDF11	0.00252785	2.00064				WDR12	1.03355e-19	3.0594
347	RGMA	5.94513e-86	1.69584							EIF4E3	2.22006e-23	2.9632	MAP4K1	0.00258042	2.29472				RNF181	1.14815e-19	2.97432
348	UNC119	7.66687e-86	1.53286							TMCC3	2.65814e-23	5.16062	PARM1	0.00258741	1.75323				NUTF2	1.17992e-19	3.42901
349	DYSF	1.19863e-85	1.53061							NFIL3	3.14514e-23	4.2994	GJA1	0.00263245	1.68259				TBRG1	1.76231e-19	1.97934
350	TMEFF1	2.67806e-85	1.80345							ADRB2	3.17142e-23	4.16051	LPHN2	0.00266501	2.11318				RRP12	1.86073e-19	5.97957
351	CEND1	1.47664e-84	2.61984							ZFP36	3.39503e-23	3.39519	SLC22A18	0.0026679	1.82657				RELT	1.86103e-19	3.91407
352	LTBP2	2.37193e-84	2.46943							HSPA1L	3.49841e-23	4.44845	SPRY3	0.00266885	1.80401				FBXL2	2.04924e-19	3.27961
353	RDH10	5.5152e-84	1.58222							IER5	3.75247e-23	3.19508	ZZEF1	0.00269843	1.7937				MCFD2	2.1428e-19	2.37995
354	THBS3	1.51001e-82	1.73136							GBP3	4.85664e-23	2.96261	NYNRIN	0.00270781	1.88852				BLOC1S2	2.17153e-19	2.07739
355	SLC24A3	4.63012e-82	1.89621							MBNL2	5.25945e-23	2.01442	BVES	0.0027535	1.98068				MECR	2.39231e-19	3.26548
356	KALRN	3.54057e-81	2.34443							SBNO2	7.82644e-23	5.16446	KIDINS220	0.00275594	1.8066				LMNA	2.45243e-19	2.97291
357	FRZB	6.40762e-81	2.48181							C2	8.10779e-23	3.95631	BC067074	0.00276671	2.0893				ARHGAP10	2.66773e-19	4.18863
358	RASSF2	8.554e-79	1.51735							OLFML1	8.63282e-23	2.69151	SLC25A18	0.00280433	2.0392				FAM102A	4.46272e-19	4.88087
359	MSRB2	2.14801e-78	1.6058							LPCAT1	8.95219e-23	2.75883	GM26648	0.00286121	2.30156				TMSB10	4.78917e-19	3.53072
360	SV2B	4.6562e-77	1.6713							MAP6	1.12045e-22	2.99381	CACNG4	0.0028969	1.96711				VARS	4.85467e-19	2.91235
361	KCNIP3	4.97664e-77	1.57352							GM15440	1.35844e-22	3.6707	NR1D2	0.00305447	2.06016				EFHD1	5.01013e-19	1.94457
362	SYNPO	1.23609e-76	1.61502							NOV	2.34923e-22	4.44115	MAN2A2	0.00314757	1.72047				ANXA2	5.2098e-19	4.16986
363	SPP1	1.428e-76	1.60381							AQP5	3.3737e-22	4.69813	TC2N	0.0031573	2.18256				GM12530	5.22974e-19	4.15507
364	FARP1	2.41832e-76	1.73931							ITGA1	3.69175e-22	3.59431	CCR5	0.00321376	1.58734				PA2G4	5.29197e-19	2.40065
365	FUCA2	3.82763e-76	2.22225							NFIX	3.69847e-22	3.01848	2019-03-06	0.00331377	1.87446				CCT7	7.77806e-19	2.57247
366	GPR37	6.94354e-75	1.84697							PDP1	4.92071e-22	3.4251	CLCN5	0.00333406	2.06369				ELOVL7	8.4074e-19	5.20268
367	CIDEB	1.45834e-74	3.23569							GPC1	5.04003e-22	3.28223	HSBP1L1	0.00336811	2.0251				TRIOBP	8.45539e-19	2.62261
368	UHMK1	3.2451e-74	1.54486							GALNT6	5.84799e-22	2.79867	TBC1D10A	0.00344759	1.64815				GSS	9.01928e-19	2.95092
369	PVRL1	4.72054e-74	2.11							IIGP1	6.1445e-22	4.08739	SORCS1	0.00356919	1.73262				THOP1	9.12596e-19	2.92087
370	TRIB2	6.06302e-74	1.71069							ISYNA1	6.87707e-22	2.45061	EXTL3	0.00357084	1.70797				NTN5	1.25776e-18	4.09569
371	ANGPTL1	6.2591e-74	1.67503							BCAR3	7.29264e-22	3.42295	TRAF3	0.00360059	2.06157				PUS1	1.25975e-18	3.02231
372	MAP2	3.78591e-73	1.71128							PRDM8	1.60716e-21	3.53387	DENND4B	0.00360225	2.09902				SLC25A43	1.26721e-18	5.72125
373	NCAN	4.44268e-72	3.13149							RHOU	2.35637e-21	4.79318	LATS1	0.00362418	2.01511				NUP50	1.34757e-18	3.236
374	BC028528	1.76614e-71	2.08229							SELM	3.38998e-21	1.64497	PANK3	0.00362492	1.68603				EIF3B	1.52961e-18	2.19423
375	NEBL	6.3392e-71	1.50381							FOXD3	4.00494e-21	2.26035	SLC16A6	0.00367214	1.56092				GNL3	1.72196e-18	2.66319
376	BC067074	1.14655e-70	2.00122							COL6A1	9.74882e-21	3.40835	LPAR3	0.00368466	2.28742				DDA1	1.80737e-18	2.61231
377	CPXM1	1.41977e-70	1.80123							TNFSF11	1.0866e-20	3.28183	PKDREJ	0.00373777	2.48329				RRP15	2.1892e-18	3.25815
378	IYD	1.63003e-70	3.42956							GABRA3	1.33448e-20	4.61099	TBX2	0.00376302	1.80631				ABCB9	2.8919e-18	3.01279
379	FAIM2	4.4049e-70	2.15106							MAMSTR	1.79726e-20	3.41324	CDS2	0.00396533	1.87262				GOLT1B	3.24076e-18	3.24902
380	SALL2	1.62016e-69	1.67557							TGM1	2.22144e-20	3.2513	2310058D17RIK	0.00402724	1.77161				RSL1D1	3.39469e-18	2.3685
381	PHLDB2	2.25769e-69	1.53826							JUND	3.0357e-20	1.87186	FABP3	0.00403397	2.43632				ADPGK	3.6556e-18	3.42978
382	GRIFIN	2.32964e-69	3.96463							ESYT1	3.40799e-20	3.69389	SLC9A1	0.00411207	1.925				BZW1	3.72937e-18	1.92315
383	MDGA2	4.82297e-69	2.06612							RAB3B	4.56637e-20	3.09838	SYT1	0.00411439	2.29107				HN1L	3.73914e-18	3.53272
384	SHANK2	1.99438e-68	2.00667							ZEB2	4.57614e-20	1.71547	SMAD7	0.00412411	1.54539				WARS	4.92402e-18	3.10575
385	COL25A1	2.01859e-68	3.01939							SRGAP2	4.58646e-20	2.91131	PHLPP1	0.00419775	1.78022				NOL12	4.95922e-18	2.46164
386	CCDC106	2.83435e-68	2.1128							LTBP1	5.09566e-20	3.87163	NT5DC2	0.00428968	1.68935				PRDX1	5.04292e-18	3.48648
387	MMAB	1.4262e-67	1.55152							UBC	5.91517e-20	1.74847	RNF213	0.00438984	1.59278				MESDC1	5.28211e-18	3.10675
388	SLC22A18	1.19701e-66	2.86626							RP24-159O13.1	6.82015e-20	3.34441	DOCK3	0.00439039	1.80598				SRP54B	5.36483e-18	1.87812
389	SLC25A35	2.07609e-66	1.5752							FGL2	7.58428e-20	3.10448	PCSK5	0.00445058	1.67415				CCT5	5.64677e-18	2.06407
390	PBX3	7.2172e-66	1.52587							TVP23A	1.0174e-19	3.38189	ARHGAP27OS2	0.00447355	2.18776				WSB2	5.74622e-18	2.44057
391	TAGLN	1.13918e-65	1.58788							CLU	1.16515e-19	3.18934	DLG3	0.00462397	2.05477				YKT6	6.35081e-18	2.76082
392	HIST1H4I	1.25822e-65	1.66655							COL27A1	1.36298e-19	2.01465	ITGB3	0.00463991	1.78712				PITHD1	7.30335e-18	2.79203
393	RIN3	1.61334e-65	1.60697							ZFP536	1.38596e-19	2.41668	DNAJC6	0.00467158	1.87726				ODC1	8.08932e-18	2.77078
394	FGFRL1	1.19065e-64	1.72971							SERTAD1	2.37747e-19	2.71486	UTP20	0.00471762	1.98525				CHCHD4	1.04877e-17	2.23379
395	NMNAT2	1.19226e-64	2.45311							PLSCR2	3.05098e-19	2.434	GFPT1	0.00475585	1.74027				ARRDC4	1.17609e-17	3.67479
396	GM20748	1.42226e-64	1.77768							FZD1	3.06756e-19	2.81652	MFAP3L	0.00488241	1.70529				TRIB3	1.24953e-17	9.77173
397	NQO1	1.47116e-64	1.52157							IL10RB	3.49385e-19	2.20212	ADCY2	0.00490771	2.06522				SLC9A3R2	1.28217e-17	2.6876
398	FGF12	2.89755e-64	2.08189							SERPINA3N	3.84165e-19	2.10105	PTGES	0.00501121	1.78557				ACOT9	1.30854e-17	1.8665
399	MYO16	5.65433e-64	1.95356							PPP1R18	4.08472e-19	2.09347	NCOA6	0.00506014	1.66027				HSPE1	1.41957e-17	2.94645
400	GM11627	1.98991e-63	2.61451							GSDMD	4.14491e-19	3.94273	BAMBI	0.00516432	1.56126				GMFB	1.42701e-17	2.11128
401	PFKFB3	2.74191e-63	1.75682							SCARB2	4.38623e-19	2.23832	E2F2	0.00524616	1.63405				RNF128	1.6276e-17	3.70873
402	PDE3B	2.34358e-62	1.72707							ACSL5	5.31667e-19	2.82652	EMR1	0.00533486	1.80721				PLK3	1.7662e-17	4.81704
403	CPEB4	2.60426e-62	1.79428							CYP2C44	6.23338e-19	4.18518	NTM	0.00534729	1.83436				RRP9	1.8107e-17	2.98116
404	A730049H05RIK	9.04611e-62	3.30466							H2-T22	6.50477e-19	2.56668	1300017J02RIK	0.00536287	1.78573				TXNDC17	1.83864e-17	2.81598
405	COLGALT2	2.90372e-61	1.95746							MSN	8.07409e-19	2.08898	CXXC4	0.00536892	1.81137				NCMAP	1.95076e-17	5.15697
406	ENPP2	7.13357e-61	1.69226							PROKR1	8.75055e-19	3.99045	FAM193B	0.00554231	1.99309				GM11732	1.96699e-17	1.70374
407	GPAM	7.30676e-61	1.74029							MGLL	9.62695e-19	2.08887	DOCK7	0.00565099	1.67499				SDC1	2.11212e-17	3.17054
408	TGFB2	1.05854e-60	1.71358							FKBP5	1.17703e-18	2.57538	DIP2A	0.00578147	1.80303				CCT6A	2.20303e-17	3.06033
409	GM17750	1.23228e-60	2.52018							ASPH	1.35284e-18	2.34374	CLCN7	0.00582816	1.831				VGF	2.21962e-17	8.59774
410	TTYH3	1.89128e-60	1.58065							4930523C07RIK	1.62926e-18	2.85928	SOBP	0.00590731	2.2626				ZFAND5	2.26191e-17	2.4241
411	KAZALD1	2.23585e-60	1.5279							PPIC	1.66728e-18	2.2982	1110037F02RIK	0.00603443	1.86542				SQSTM1	2.39975e-17	3.46981
412	CHSY1	9.94711e-60	1.9103							EIF4EBP1	1.86981e-18	2.23156	4930518I15RIK	0.00603601	2.35243				CCDC40	2.50584e-17	3.93231
413	KCNE1L	4.93652e-59	1.95929							I830012O16RIK	1.87418e-18	3.25001	RASGRP4	0.00622344	1.61054				NME2	2.52915e-17	1.76623
414	DDR2	1.35187e-58	1.77009							SHROOM1	2.00315e-18	4.13195	RASA2	0.00629284	1.71813				SMIM3	2.56985e-17	3.38983
415	SRCIN1	2.09223e-58	1.54883							PIGZ	2.24584e-18	4.20978	CORO6	0.00630405	2.31764				GRPEL1	2.59553e-17	2.03308
416	HPGD	4.7097e-58	2.31496							OASL2	2.86358e-18	3.11062	ADAMTS3	0.00637578	2.49164				CRELD2	2.77081e-17	2.58778
417	WDR11	6.05659e-58	1.58713							SYDE1	2.98322e-18	3.00055	ELOVL2	0.00641794	1.91204				RPP40	2.85674e-17	3.47873
418	ADORA1	4.95174e-57	2.62103							PFKP	3.7457e-18	3.01608	TTC38	0.00675637	1.76372				PLOD3	3.164e-17	2.64539
419	EPS8	8.40034e-57	1.662							GNB4	5.16108e-18	2.55125	NID1	0.00675705	1.66786				MKRN1	3.2325e-17	1.79187
420	STK38L	1.97798e-56	1.52832							CRISPLD2	5.20617e-18	3.14636	GPR126	0.00679016	1.61005				SERPINB6A	3.25699e-17	2.24178
421	PCYT1B	3.8644e-56	1.82703							AMOTL2	6.39243e-18	2.72391	PRRC2A	0.00701443	1.63581				NCLN	3.53994e-17	2.37189
422	CIART	6.73304e-56	1.90966							PDGFB	6.45311e-18	4.13476	TTLL4	0.00708446	2.0371				BYSL	3.70028e-17	3.01081
423	MPP2	7.70101e-56	1.98574							ETS1	9.47298e-18	3.53861	COL22A1	0.00715756	1.84582				HSPBP1	3.81183e-17	2.45782
424	SLCO1C1	1.19943e-55	2.85182							IRGM1	1.22117e-17	3.19098	HSD17B7	0.00727559	1.75421				USO1	4.11583e-17	2.8422
425	LIPG	7.47599e-55	3.13296							IRF1	1.42847e-17	2.92413	ARMC4	0.00739508	1.64875				KTI12	4.33632e-17	2.88109
426	TCEAL5	9.14315e-55	1.75691							FAM47E	1.46997e-17	4.35215	ATP7A	0.00741493	1.79129				NIP7	5.55849e-17	2.21687
427	PLCD4	1.08575e-54	1.86368							SLC22A23	1.59279e-17	2.99932	SNX25	0.00759235	2.37411				PUSL1	5.96921e-17	2.71675
428	NTM	4.11448e-54	2.39722							PLCE1	1.84158e-17	2.22655	ZCCHC12	0.00760167	1.86723				NFKB2	6.67716e-17	2.56072
429	KCNK3	1.74389e-53	1.75743							PAK3	2.10581e-17	4.05314	PDE2A	0.00764176	1.59262				BTBD19	7.01021e-17	7.29669
430	SHISA7	2.22841e-53	1.86531							LAMA5	2.85093e-17	3.59859	RNASE6	0.00764516	1.65373				GNB2L1	7.18268e-17	2.8044
431	PCDHA10	3.36371e-53	1.59413							CAPN2	2.9028e-17	2.19478	SLCO3A1	0.00767859	1.70475				HSP90AA1	8.0204e-17	3.02959
432	6430573F11RIK	1.90554e-52	2.26893							HMGB2	3.97679e-17	2.34631	AOC2	0.0077232	1.56018				DGAT2	8.29046e-17	5.0434
433	SHROOM3	3.94993e-52	1.7822							FAM20A	4.43988e-17	3.54629	SZT2	0.00772941	1.94537				ACTG1	8.82779e-17	2.6804
434	MYOM3	3.97372e-52	2.77244							NPDC1	4.9996e-17	1.73906	PYGB	0.00805825	1.68897				PSMD14	8.9032e-17	1.9822
435	SMIM3	5.80373e-52	1.55634							CXCL1	6.21171e-17	6.02975	B3GALT5	0.00809475	2.01067				SLC6A6	9.16828e-17	2.38071
436	PPP2R2C	9.38755e-52	1.51633							SLIT2	6.24565e-17	3.5124	AGO3	0.00831296	1.94151				EIF2S2	9.3897e-17	2.48193
437	NAT8L	5.37125e-51	1.50125							2200002D01RIK	6.44416e-17	3.81741	NDST1	0.00841335	1.84062				THYN1	9.79254e-17	2.21531
438	EPHX1	6.47358e-51	1.78319							FAM105A	6.53878e-17	5.50785	TRRAP	0.00846344	1.71515				SCRN1	1.01271e-16	2.35923
439	RASL11A	6.93459e-51	1.54109							SEMA3C	9.42538e-17	2.71099	PLCH1	0.00849837	2.1744				MTHFD2	1.13026e-16	4.29269
440	PDGFRL	7.15459e-51	1.65978							KLF15	1.12974e-16	2.29438	SCRIB	0.00862432	1.85903				KPNA3	1.17013e-16	3.01329
441	GM19426	7.46904e-51	1.70984							IL15	1.21292e-16	3.92235	PEAR1	0.00871138	1.98279				UCHL3	1.23751e-16	2.17995
442	PTPN3	1.12288e-50	1.692							ATP8A2	1.21743e-16	2.69699	UBR5	0.00875552	1.66687				RAN	1.28455e-16	3.02776
443	1700023F06RIK	1.15183e-50	2.38694							MMP2	1.40772e-16	3.46024	EDIL3	0.00877033	1.65494				CD44	1.31807e-16	2.50553
444	COBL	1.15655e-49	1.62745							C1RL	1.57083e-16	4.24197	KLHL42	0.00889937	1.9074				BCAP29	1.51053e-16	2.31206
445	TMEM229B	3.89113e-49	2.35402							ARID5A	1.6555e-16	3.56311	SH3PXD2A	0.00893628	1.55439				APOOL	1.74734e-16	1.98316
446	CDA	1.58959e-48	2.09511							HOXD3OS1	1.65888e-16	4.04094	VSTM2A	0.00895487	1.83835				SURF2	1.78668e-16	2.32067
447	HAPLN1	1.6052e-48	2.40767							PIM3	1.85701e-16	2.67485	PDE5A	0.00906856	1.70988				PSMC6	1.79033e-16	1.87647
448	TM4SF1	1.28698e-47	1.65972							NFATC2	1.87856e-16	4.20744	PARP8	0.00921583	1.53048				CDV3	1.90143e-16	2.21795
449	SLC12A7	2.40751e-47	1.58013							1110007C09RIK	2.0619e-16	1.91636	MPEG1	0.00923126	1.54873				RELN	1.9914e-16	2.43268
450	FAM46C	7.40187e-47	1.8733							GM13470	2.91984e-16	3.82209	DPY19L4	0.00927804	1.84636				SMYD5	2.20751e-16	3.72562
451	PCP4	3.38173e-46	2.11032							MCAM	3.00042e-16	2.07987	CROT	0.00929205	1.6851				RPL9-PS6	2.28838e-16	2.32358
452	ROPN1L	1.00299e-45	1.93793							CLEC11A	3.04957e-16	3.19779	PRKAR1B	0.0093212	1.5638				RGS16	2.31221e-16	5.04398
453	NEFL	1.44728e-45	2.00461							2410004P03RIK	3.2464e-16	1.52892	LCLAT1	0.00933632	1.88879				DBN1	2.39119e-16	2.91239
454	IL18BP	1.75037e-45	1.64215							GIPC2	3.37986e-16	4.13683	HVCN1	0.00944447	1.62523				TIMM17A	2.6196e-16	2.37387
455	FREM2	5.9223e-45	1.71526							DACT3	5.40935e-16	3.49763	KIF1C	0.00952115	1.75862				MAST2	3.39283e-16	2.90387
456	B3GNT4	1.37957e-44	2.59959							THSD7A	7.1556e-16	3.60781	PPP1R15B	0.00962548	1.78485				B4GALNT1	3.81136e-16	4.52912
457	NOTCH3	1.56731e-44	1.84309							PCSK2	7.52118e-16	2.9145	GALNT18	0.00975031	1.90724				TIMM10	3.87186e-16	2.1564
458	ENO1B	3.15582e-44	1.58293							2900041M22RIK	7.6566e-16	3.04362	HID1	0.00975678	1.70296				SLC25A24	3.90216e-16	3.8414
459	ADHFE1	4.26093e-44	1.65936							SH3BP2	8.50728e-16	4.3282	NPL	0.00986535	1.59411				COL18A1	4.20613e-16	2.13966
460	FAM149A	5.02315e-44	1.51161							FAM26F	8.67007e-16	9.3225	DGKQ	0.0100511	2.02815				NUBP1	4.44663e-16	2.06382
461	GUCY1A3	9.65691e-44	2.13783							HFE	1.31497e-15	2.77042	ARRB1	0.0100629	1.68478				TMEM180	4.54671e-16	2.86833
462	AQP11	1.71463e-43	1.93802							LRRFIP1	1.32409e-15	3.26088	TRP53INP2	0.0102883	1.65115				C1QBP	4.57889e-16	1.98388
463	GPER1	2.34185e-43	1.91443							ANKRD44	1.66328e-15	2.83381	HBA-A1	0.0103277	1.62607				ATP6V1H	4.59886e-16	2.49226
464	MPV17L	9.54057e-43	1.52211							HSPA1A	1.75146e-15	1.92209	PHLDB2	0.0103474	1.90971				SLC7A5	5.06533e-16	4.42601
465	LRAT	1.27491e-42	2.26054							USP18	2.22926e-15	3.30272	NLRP3	0.0105048	2.22364				TNNC1	5.48466e-16	5.04834
466	TTC18	1.4553e-42	2.16744							FKBP7	2.59413e-15	2.25747	MAPK4	0.0107608	2.11307				BRMS1	5.50433e-16	2.2167
467	KCNC3	2.94327e-42	1.6728							FBXO27	3.21074e-15	3.5181	TRAK2	0.0108096	1.94086				CAPG	5.79483e-16	2.08187
468	RHOD	3.04417e-42	1.93281							SPPL3	3.22238e-15	2.25062	USP24	0.0108665	1.67168				CCT8	6.61645e-16	2.1488
469	TPMT	1.14076e-41	1.53034							HEG1	3.50255e-15	3.29769	CCDC160	0.0109456	1.71989				HIST1H2AG	6.76573e-16	1.59324
470	ARHGAP28	1.21721e-41	2.4257							GM13031	4.30613e-15	3.73819	SLC22A17	0.0110634	1.57307				SEMA7A	7.4191e-16	4.37827
471	GUCY1B3	1.74607e-41	1.59409							ABCA8B	4.51068e-15	2.07938	MEGF8	0.0110718	1.86989				PALM2	7.8263e-16	5.22831
472	ILDR2	2.06663e-41	2.20157							FRMD3	4.62553e-15	3.24408	EIF4G1	0.0111376	1.627				TPST2	7.84189e-16	2.27886
473	DDIT4L	4.67243e-41	1.95019							TNFAIP6	5.0651e-15	2.75403	LGALS4	0.0112048	2.26417				CLDN19	1.04335e-15	3.19835
474	PEG10	1.5907e-40	1.68642							NRM	5.92266e-15	2.78273	MSI2	0.0112452	1.66249				AP1S1	1.05038e-15	2.19031
475	VEPH1	5.10761e-40	2.7338							BCL2	6.99785e-15	2.03124	ZFP217	0.0112787	2.06188				ATXN10	1.05328e-15	2.66928
476	MEGF11	6.3637e-40	1.87347							AI854703	7.45742e-15	3.70026	PER2	0.0113165	2.28236				COLGALT1	1.0605e-15	2.06328
477	ELOVL7	9.01369e-40	1.96566							APOL6	7.84878e-15	5.0344	CASKIN1	0.0114779	1.89979				FAM20C	1.10871e-15	2.88058
478	GM684	2.4025e-39	1.84558							CHMP4C	8.66579e-15	3.17127	LMTK2	0.0116114	2.04667				FAM49B	1.13e-15	1.82591
479	EFCAB12	3.77573e-39	1.55622							SLFN8	9.17482e-15	4.00484	CLUH	0.0116269	1.67056				GSTP2	1.39129e-15	3.3904
480	NME5	6.46993e-39	1.61248							IRGM2	1.02298e-14	2.88391	ARHGAP29	0.0117117	1.79692				GM7536	1.4096e-15	2.37738
481	SLCO1A5	1.08352e-38	1.75759							TMEM106A	1.12657e-14	3.22123	GPR179	0.0119129	1.70202				ADRM1	1.412e-15	2.16262
482	CASKIN1	1.96414e-38	1.60745							CDKN2C	1.14687e-14	2.09319	UPK1A	0.0119399	2.24777				MRPL33	1.49427e-15	2.04685
483	ACKR3	2.49763e-38	1.5531							MAP3K4	1.18859e-14	2.56255	UBR3	0.0119437	1.78725				PSMC2	1.62623e-15	2.01083
484	CITED1	3.29683e-38	1.50028							ADAM19	1.18918e-14	3.4515	PYDC4	0.0121206	1.78982				GM10020	1.72455e-15	1.85572
485	C2CD4B	3.85079e-38	3.3605							RARG	1.26036e-14	2.47733	UBE2U	0.0122172	1.66407				SURF4	1.85945e-15	1.85534
486	SDSL	4.11335e-38	1.90858							TMEM176A	1.39876e-14	1.96103	TTYH3	0.01224	1.74208				NOP9	1.9233e-15	2.4824
487	HOXB8	9.19763e-38	1.50043							SHB	1.47029e-14	3.42829	PLA2G3	0.012263	1.76302				ETS1	1.95308e-15	3.37919
488	AQP2	4.00337e-37	2.29164							TAX1BP3	1.49352e-14	1.57946	CIPC	0.0123644	1.62609				CMBL	2.23004e-15	2.5053
489	TPD52L1	4.06719e-37	2.07452							PDE1A	1.63042e-14	2.04721	BC028528	0.0125585	2.13562				TFG	2.28614e-15	2.19151
490	ZBTB10	4.11941e-37	1.55709							IL4RA	1.63845e-14	3.54091	XKR6	0.0126195	2.22681				ATAD3A	2.52927e-15	2.72956
491	FRAS1	8.94783e-37	1.78601							BICC1	1.71776e-14	2.94445	FADS6	0.0128679	1.60268				SUPT3	2.57233e-15	2.51884
492	COL4A4	1.0233e-36	1.54198							B3GNT9	2.05634e-14	3.23357	ME1	0.0129521	1.52276				PLBD2	2.63626e-15	2.54504
493	LRRN1	4.54846e-36	1.81639							ADAM22	2.27598e-14	3.35288	MPP2	0.013022	1.92241				TRNP1	2.686e-15	4.22447
494	ACACB	5.70811e-36	1.53076							OPCML	2.57547e-14	3.34456	AREL1	0.0130309	1.95652				TXNDC5	2.75563e-15	1.90725
495	ARHGAP27	1.83422e-35	1.93853							ADAMTS20	2.61481e-14	2.74901	NGP	0.0132158	1.64409				LEPROTL1	2.91797e-15	1.76048
496	ACP5	4.05913e-35	2.08595							CYB5R1	3.60267e-14	3.1857	DCUN1D4	0.0132902	1.93139				DISP1	2.95984e-15	3.202
497	PLA2G5	7.85922e-35	2.59123							GSTM2	4.14819e-14	3.29189	SASH1	0.0136494	1.66467				CHAC1	3.04389e-15	4.91698
498	PLCH1	1.04883e-34	2.06444							SLITRK6	4.65834e-14	3.91277	GRIK5	0.0136628	1.78013				BOP1	3.27152e-15	2.39288
499	YJEFN3	1.41852e-34	1.50559							ZFP281	5.39572e-14	2.60637	PFN4	0.013785	1.69498				SPIDR	3.43455e-15	3.76853
500	AMOT	1.68898e-34	1.5137							MICALL2	6.08465e-14	2.75581	MT-ND6	0.014037	1.96695				DHX34	3.4468e-15	3.80391
501	ELL2	2.80056e-34	1.51814							TUBB4A	6.86259e-14	2.11512	PPP1R3C	0.0141646	1.65189				TSPAN17	3.71182e-15	2.25124
502	2010007H06RIK	3.25221e-34	1.73135							GLT8D2	7.46507e-14	3.65176	SLC12A7	0.0142941	1.77125				DBNL	3.8543e-15	2.00459
503	PAPLN	4.78298e-34	2.20425							SERPINH1	8.42765e-14	1.80563	2610507B11RIK	0.0143547	1.7353				THOC5	3.97892e-15	2.32606
504	PRICKLE2	7.07893e-34	1.55961							2010204K13RIK	8.77658e-14	2.43756	USP9X	0.0144976	1.67016				B4GALT5	4.39303e-15	4.90119
505	CHST11	1.11481e-33	1.90271							CD97	1.12074e-13	2.77968	XPO1	0.0145672	1.72661				RPL12	4.95769e-15	2.77855
506	PARD6B	2.15671e-33	1.73204							KCTD11	1.22401e-13	2.40601	MIA	0.0145769	1.76716				PBDC1	5.07882e-15	1.99398
507	RORC	2.62108e-33	1.82425							COMT	1.25245e-13	1.83736	ZFP329	0.0146711	1.71569				MYOF	5.16076e-15	4.62959
508	MCC	1.45162e-32	1.56329							FLOT1	1.36976e-13	1.97628	ELF4	0.0148136	1.53608				NUDT22	5.30634e-15	2.9062
509	SLC25A34	6.24512e-32	2.47186							9130008F23RIK	1.40002e-13	3.64315	RARRES1	0.015007	1.51817				NXPH3	5.34152e-15	7.91119
510	INSL6	9.16634e-32	1.66465							BCOR	1.62958e-13	3.25471	ITPR2	0.0150952	1.86664				IER5	5.59771e-15	2.23652
511	SLC8A2	9.56364e-32	2.34892							SIAH1A	2.48916e-13	2.3788	FGG	0.0152154	1.51281				NAT9	5.91731e-15	2.60423
512	ARC	3.90946e-31	2.07956							PDGFD	2.62603e-13	3.87677	RAB3GAP2	0.0152745	1.8994				TATDN1	6.01888e-15	2.97467
513	MAPK10	4.25195e-31	1.77856							BTC	2.65883e-13	3.06694	PNPLA6	0.0152787	1.79225				1110046J04RIK	7.24283e-15	3.23663
514	SLC2A9	1.47162e-30	1.75452							NR3C1	3.30928e-13	2.36962	TLX2	0.0155496	1.69187				POLR1E	7.91241e-15	3.0607
515	GM11713	1.97964e-30	1.8046							IER5L	3.35166e-13	2.37817	VEPH1	0.0157599	2.41897				AKR1B3	8.39769e-15	2.80105
516	2010320O07RIK	2.86569e-30	1.62377							TRIM30A	4.25929e-13	4.47058	TMC7	0.0158374	1.68208				RIN1	8.88888e-15	2.77917
517	AASS	2.93076e-30	2.31808							EPHA2	4.82307e-13	3.57149	OCIAD2	0.0158475	1.52721				GM807	8.89314e-15	2.2008
518	D330050G23RIK	3.20361e-30	1.52605							CRTAP	5.18352e-13	2.36804	GM22714	0.0160667	2.05299				NCS1	9.16511e-15	5.68395
519	GSG1L	3.51551e-30	2.62058							STX11	5.39087e-13	3.63259	ZBTB10	0.0160967	1.76212				TIMM50	9.50344e-15	1.92492
520	TAGLN3	6.77639e-30	1.81685							ACOT9	5.45081e-13	2.04483	CRAMP1L	0.0161637	2.11826				PSMC1	9.67106e-15	1.93963
521	NOS3	1.44725e-29	1.59056							TBC1D16	5.87145e-13	3.61732	PVALB	0.0162337	1.72267				MRPL46	1.00714e-14	2.09988
522	MAST4	2.30501e-29	1.61327							SEMA3F	6.26746e-13	3.54842	DIRAS1	0.016359	1.80444				WDR1	1.00943e-14	1.69295
523	RAVER2	2.56738e-29	2.24312							TRAF5	6.5262e-13	3.72048	5430417L22RIK	0.0164647	1.65095				N6AMT2	1.03231e-14	2.09096
524	ADAMTS18	2.76875e-29	2.06097							MMP19	6.79766e-13	4.42995	NOTCH3	0.0165264	1.58778				CLN8	1.12773e-14	2.52746
525	CCDC60	3.33194e-29	1.71667							LRRK2	8.75787e-13	3.49622	PCDH19	0.0169393	1.75664				TTC12	1.16771e-14	3.27083
526	CHDH	6.5797e-29	1.66143							CCHCR1	9.66917e-13	3.00047	FBLN1	0.0172807	1.70493				EBNA1BP2	1.20471e-14	2.15752
527	GM17025	1.28306e-28	1.95657							1810043G02RIK	9.88457e-13	2.18453	COL7A1	0.0173802	2.2148				DDX21	1.28054e-14	2.96136
528	TRIM29	2.43649e-28	2.46205							SCN9A	1.31214e-12	3.21908	CD46	0.0174887	1.95246				PGS1	1.30321e-14	1.96163
529	TGFA	4.34073e-28	1.73159							SEMA3E	1.34467e-12	2.88206	GNA12	0.0174987	1.70469				TUBA1C	1.33576e-14	3.87594
530	HECTD2	5.88355e-28	1.52954							HYI	1.67837e-12	2.07017	CCNT2	0.0175355	1.5073				IFT43	1.35163e-14	2.01382
531	TC2N	7.18303e-28	1.76227							ARFGAP3	1.77214e-12	2.48171	LRRN1	0.0175954	2.27284				BOLA2	1.43732e-14	1.53753
532	NRTN	7.18735e-28	1.66929							SPON2	1.88622e-12	3.81247	KIF3B	0.017901	1.7276				CSTB	1.45173e-14	2.45151
533	PSRC1	2.84889e-27	1.7454							DNAJB3	1.90698e-12	3.13412	ZFP423	0.0179285	1.86548				GABARAPL1	1.45886e-14	2.69465
534	NRXN1	3.19973e-27	1.79007							AXL	1.94154e-12	2.0765	TIAM2	0.0180553	2.08356				ACTN4	1.47294e-14	1.91238
535	FGD2	1.05146e-26	1.76799							1700007G11RIK	2.43e-12	1.71685	ZFP711	0.01821	1.97436				SNRPA1	1.55128e-14	2.33812
536	S100A2	2.51002e-26	2.26292							ST3GAL1	2.51725e-12	3.3255	PTPLAD1	0.0182198	1.70641				RGS19	1.61414e-14	2.54917
537	4933407L21RIK	1.07261e-25	1.51116							ECM2	2.83709e-12	2.73261	SEC14L1	0.0182307	1.65947				CHPF2	1.61887e-14	2.3427
538	3300002I08RIK	1.64413e-25	1.77481							MAPK12	3.02878e-12	3.48264	PGBD1	0.0183617	1.82452				TUBB5	1.6528e-14	2.61229
539	PERM1	3.30753e-25	2.20193							KCNQ5	3.17148e-12	2.94335	ADRA2C	0.018508	1.74772				CAST	1.65346e-14	3.24608
540	LRRC27	3.5055e-25	1.77442							IGLON5	3.42514e-12	2.69332	ADAMTS9	0.0187693	2.17728				CAMK2B	1.93211e-14	4.5223
541	GM15640	5.57874e-25	1.92075							CNN2	3.67052e-12	2.31672	CYFIP1	0.0190409	1.57217				UBL4	1.95985e-14	2.03497
542	RAB33A	2.33445e-24	2.12469							PPL	5.18705e-12	3.0739	USP6NL	0.0191417	1.83758				SSSCA1	1.96514e-14	1.91157
543	FAM84B	3.67386e-24	1.69232							A530095I07RIK	5.70843e-12	3.14763	S1PR1	0.0192479	2.06167				TTLL9	1.96814e-14	2.12145
544	CYP46A1	5.01118e-24	1.59525							NID2	1.04038e-11	2.22463	PTPN3	0.0193918	1.94389				RPS26-PS1	2.03538e-14	2.63601
545	PNPLA3	5.60022e-24	1.83449							SELENBP1	1.08634e-11	2.3574	WDR6	0.0193973	1.75745				AFAP1L1	2.32664e-14	3.50602
546	CUBN	6.00386e-24	1.51592							PLA2R1	1.13057e-11	4.25208	POM121	0.0198224	1.61678				FAM83F	2.33993e-14	3.65805
547	EFNB3	6.95783e-24	1.55233							LRRTM4	1.27332e-11	3.0255	PLAGL1	0.0198303	1.65245				CHRDL1	2.46892e-14	3.29852
548	SLC2A6	8.77347e-24	1.87618							IL17RD	1.33514e-11	3.3324	EGLN1	0.0198411	1.61198				TRMT1	2.92104e-14	1.83801
549	WWC1	2.28464e-23	1.90534							PARP3	1.35275e-11	2.3236	PLEKHN1	0.020176	1.67414				EIF5A	2.92714e-14	2.74706
550	ARHGAP27OS2	2.8705e-23	1.85822							MILL2	1.64974e-11	3.47894	GM15270	0.0203359	1.71946				ADO	3.16653e-14	2.56195
551	NABP1	4.47145e-23	1.58824							SIPA1	2.16869e-11	2.14522	PATE2	0.0204899	2.0667				EIF1A	3.36891e-14	1.83809
552	FAM124A	5.62289e-23	1.61057							MLIP	2.30215e-11	2.45804	BRD1	0.0208997	1.7424				TEX2	3.71444e-14	3.10114
553	ETNPPL	1.17852e-22	1.77158							ARHGEF25	2.31266e-11	2.26402	4930402H24RIK	0.0209113	1.6544				PARP3	3.82987e-14	2.13264
554	ADCYAP1R1	1.24815e-22	1.75302							1700023L04RIK	2.31347e-11	1.85127	DCLK2	0.020927	1.83258				SSR3	3.99894e-14	1.72089
555	CAR3	1.58377e-22	2.54317							MYC	2.80788e-11	2.90274	GM15764	0.0210152	1.63769				WDR18	4.14483e-14	2.20965
556	C130021I20RIK	1.7441e-22	1.58207							MFSD6	3.01345e-11	2.62305	CLEC3B	0.0213497	1.90221				GALNS	4.2228e-14	3.59007
557	GAB3	2.91166e-22	1.63968							TMEM88B	3.07311e-11	3.22272	2900026A02RIK	0.0214622	1.82683				CYSTM1	4.58953e-14	2.85386
558	SULT4A1	2.92833e-22	1.51508							TLE6	3.21186e-11	3.14051	GAS6	0.0214824	1.52805				SMYD2	4.62895e-14	1.71769
559	IGDCC4	3.29479e-22	1.63416							PAMR1	3.26186e-11	1.70962	GREB1	0.0220235	1.82741				GTF2F2	5.024e-14	2.25079
560	GM17501	3.97177e-22	1.73856							MCTP1	3.3348e-11	2.96595	ZFP219	0.0221649	1.61699				TSR1	5.11893e-14	3.11183
561	CPLX1	4.23348e-22	1.73711							FSTL3	3.39361e-11	2.2757	NCK2	0.0222945	2.14555				VMP1	5.16775e-14	1.73123
562	A930001A20RIK	6.74505e-22	1.98771							OTOR	3.47755e-11	4.05011	CFP	0.0224052	1.53071				MAP7D1	5.68923e-14	2.08835
563	MORN5	9.75366e-22	2.04703							CLVS1	3.55408e-11	5.03199	EPHX1	0.0224659	1.73277				XRCC5	5.74091e-14	2.48059
564	D630024D03RIK	1.31916e-21	1.73363							DLC1	3.96037e-11	2.30971	9030612E09RIK	0.0225113	1.59767				TRAPPC1	6.00915e-14	1.56823
565	MKLN1OS	2.44237e-21	1.52381							XAF1	4.00033e-11	2.09868	CDC14A	0.0229057	1.86193				POLR2H	6.16314e-14	2.1078
566	EGFL6	4.35341e-21	1.68085							ARHGEF3	4.53517e-11	2.78442	ASCC2	0.022923	1.59564				RPL36AL	6.62754e-14	2.21468
567	E2F3	1.70535e-20	1.65858							CTNNA2	4.6241e-11	2.87577	ZCCHC24	0.0231151	1.64372				DNTTIP1	6.83789e-14	2.23866
568	CXXC4	2.13338e-20	1.95059							SPSB1	4.68554e-11	3.16088	DTX4	0.023374	1.60866				SLC38A7	6.91728e-14	3.13435
569	1700001L19RIK	3.02161e-20	1.63513							FSCN1	4.79871e-11	1.83176	ADCY5	0.0233795	1.78059				PSMD3	6.9368e-14	1.96919
570	BC048546	4.04624e-20	1.73423							TGTP2	5.44721e-11	3.05088	DNAJC16	0.0234023	1.69799				SNX7	7.01863e-14	1.87707
571	A330041J22RIK	4.47174e-20	1.54817							IGTP	5.69928e-11	2.61747	PPP1R1C	0.0238072	1.89955				BAZ1A	7.53876e-14	6.08073
572	ELAVL3	6.92676e-20	1.87136							MACROD2	6.46293e-11	2.11431	CUL9	0.0238206	1.72024				AP3B2	7.73472e-14	3.20885
573	PRRX2	1.308e-19	1.61888							SLC25A43	6.49983e-11	3.34258	RFTN1	0.0239488	1.52016				APPBP2OS	7.77678e-14	3.48252
574	GM11650	1.611e-19	1.94							TNS1	8.13712e-11	2.40478	LRP2	0.0245963	1.84843				GSTP1	8.10041e-14	3.40766
575	PVALB	2.84817e-19	2.42908							HDAC5	1.01442e-10	2.37317	NBAS	0.0246031	1.83469				A430108G06RIK	8.23123e-14	2.33787
576	PROM2	4.71639e-19	1.53798							SOX6	1.11041e-10	2.4681	APH1B	0.0247973	1.76879				BAG3	8.40267e-14	2.31516
577	1700040L02RIK	4.79185e-19	1.98278							GM12530	1.21237e-10	3.43496	PLA1A	0.0251622	1.5159				PVR	8.45729e-14	2.39181
578	FHIT	5.80159e-19	1.62456							GAB1	1.23623e-10	2.37717	SCARA5	0.0253114	1.79768				DERA	9.18509e-14	3.02693
579	GM1992	6.56476e-19	1.56023							MAP3K8	1.34809e-10	3.50735	RIIAD1	0.0253531	2.03548				MLIP	9.19197e-14	2.53989
580	DTX1	1.06046e-18	1.64061							NFKBIZ	1.38865e-10	3.07194	SREBF2	0.0254483	1.73472				MCTS1	9.85538e-14	1.52201
581	THRB	1.43636e-18	1.52774							PSMB10	1.50288e-10	2.0761	EDNRA	0.0257737	2.01632				IMPDH2	1.05658e-13	1.81528
582	NEFM	1.52324e-18	1.60788							GM22	1.65409e-10	2.72122	MYT1	0.0259736	1.51143				APRT	1.11711e-13	1.8462
583	ROBO2	1.70133e-18	1.79745							RALBP1	1.7466e-10	2.05462	MAMDC2	0.0260384	1.62606				DHPS	1.14576e-13	1.98073
584	TRP63	1.73667e-18	1.53							METTL24	2.18792e-10	3.13346	MTTP	0.0261836	1.81597				EIF6	1.25094e-13	1.882
585	GM16070	4.35045e-18	1.95121							RAD18	2.27684e-10	3.14205	QK	0.026595	1.54616				NIFK	1.26642e-13	2.41676
586	IP6K3	6.22139e-18	1.84557							FKBP9	2.33408e-10	1.91333	MYH14	0.0266353	1.64136				UBE2G2	1.30421e-13	2.06033
587	ARHGEF15	6.23444e-18	1.6143							SLAMF8	2.39109e-10	2.93076	PCDHB10	0.0272641	1.7775				2019-09-03	1.31933e-13	3.76169
588	TMEM44	6.27465e-18	1.83654							CYP7B1	2.94598e-10	2.13474	EFR3B	0.0279087	1.75783				BICD2	1.34528e-13	2.45656
589	F630040K05RIK	1.17098e-17	1.90695							RECK	2.99564e-10	2.572	RP24-439I22.1	0.0285253	2.00743				PCNX	1.35494e-13	2.86112
590	ZSWIM5	1.26908e-17	1.55638							TRIM5	3.01936e-10	3.84072	DYNC2H1	0.0287982	1.6372				NME6	1.53323e-13	2.33417
591	TWIST1	4.60329e-17	1.67563							APP	3.14647e-10	1.66822	RASSF5	0.0291103	1.57448				FAM53B	1.61401e-13	2.23143
592	EHHADH	5.02043e-17	1.52346							ADK	4.52313e-10	1.92044	HOTAIRM1	0.0293016	1.74593				SACS	1.67171e-13	4.40492
593	COL19A1	5.90497e-17	1.56165							MAFK	4.84326e-10	2.94672	GPR37	0.0296558	2.00149				CYP20A1	1.7384e-13	1.95963
594	HMGCLL1	6.44528e-17	1.81902							PLSCR4	5.16482e-10	1.88922	WNK2	0.0298244	1.69052				RPL29	1.79383e-13	2.50539
595	TLDC2	7.81918e-17	1.91958							PAPPA	5.38352e-10	3.01659	MTMR12	0.0298588	1.92078				PSMD12	1.80015e-13	1.89981
596	DNAH8	7.9755e-17	1.8792							DOCK5	5.95564e-10	3.38153	HC	0.0299422	1.58901				CCDC134	1.81577e-13	2.81891
597	GRAMD2	1.36812e-16	1.737							TEKT2	7.00371e-10	3.70014	DMXL1	0.0300729	1.6591				RABGEF1	2.01585e-13	2.94598
598	GPR162	1.57999e-16	1.63401							ERBB2	7.07313e-10	2.261	SLC35E1	0.0302082	1.62107				REEP5	2.05253e-13	2.02976
599	DCTD	1.58077e-16	1.52205							HTR1B	7.40154e-10	2.59982	TSPAN13	0.0303694	1.6288				MRPL34	2.14518e-13	1.74928
600	COL4A5	2.16948e-16	1.5716							SLC1A5	7.56342e-10	1.98471	SLC8A2	0.0304921	1.94701				TMEM214	2.18217e-13	2.20434
601	DNAIC1	2.88365e-16	1.77102							OSBPL5	7.74443e-10	2.53607	GM26563	0.0305981	1.69999				CERS2	2.27724e-13	2.5975
602	RP23-392G15.1	4.85868e-16	1.51502							LRRN3	8.28491e-10	2.2764	PCDHB2	0.0307558	1.75443				OLA1	2.40809e-13	1.70801
603	AGBL2	5.05257e-16	1.66333							BACH1	8.82132e-10	2.29334	EMC1	0.0309138	1.69301				DOHH	2.73022e-13	1.78416
604	MED9OS	6.55616e-16	1.58013							CNKSR2	9.24181e-10	2.5053	SLCO1C1	0.0311663	2.18129				PPP1R16B	3.11402e-13	4.0942
605	ATP6V1C2	2.70443e-15	1.72639							APOBEC3	9.3417e-10	2.6633	FEM1B	0.0319516	1.72434				UTP18	3.20058e-13	2.48403
606	LCTL	2.93777e-15	1.77605							PRIM1	9.70882e-10	2.62419	CEP72	0.0319872	1.50284				OMP	3.34604e-13	3.49767
607	SHC2	3.46261e-15	1.77857							NEAT1	1.03869e-09	1.75204	NDNF	0.0323716	1.78613				EXOC1	3.37869e-13	2.33003
608	DISP2	8.75098e-15	1.74644							SMYD2	1.04868e-09	1.99842	ATP9B	0.0331485	1.71394				SLC35D2	3.49911e-13	3.24773
609	TEKT1	9.27393e-15	1.84179							RASA4	1.12157e-09	3.23606	FNBP1L	0.0335371	1.79507				RPS26	3.51884e-13	2.46378
610	GM12522	9.42723e-15	1.51484							DUOXA1	1.17914e-09	2.49551	GJB6	0.0338509	1.60466				PFN1	3.52665e-13	2.56181
611	GM7854	9.6005e-15	1.65195							GBP9	1.26715e-09	3.1198	PPARGC1A	0.034052	1.72069				CAPZB	3.57415e-13	2.097
612	CLEC2L	1.09208e-14	1.70722							LTBP4	1.50727e-09	2.28423	APOC1	0.0342044	1.56916				COMMD4	3.61865e-13	1.88565
613	PKDREJ	1.58585e-14	1.62985							CDKN1A	1.61006e-09	1.83137	ZFP516	0.0342432	1.63621				CPEB1	3.7812e-13	3.21396
614	FMO4	2.06272e-14	1.82539							ADAMTSL5	1.69137e-09	2.02373	USP54	0.0342462	1.92174				MT3	4.02212e-13	5.13668
615	D630033O11RIK	2.49496e-14	1.55761							HTRA3	1.73462e-09	2.33842	GTF2I	0.0342464	1.60969				CNIH4	4.02347e-13	1.70178
616	RERG	3.22848e-14	1.62636							CHST13	1.87426e-09	2.55077	ZFP653	0.0342689	1.69296				SLC2A6	4.06769e-13	3.7918
617	GM11127	3.74498e-14	1.69956							C1QL3	2.03917e-09	3.09311	SPG11	0.03432	1.6249				GTPBP8	4.14677e-13	3.62343
618	TTLL7	3.80814e-14	1.56833							CAPN1	2.12529e-09	2.21678	WNK4	0.0343976	1.74732				XIRP1	4.16694e-13	1.58586
619	MSC	3.98208e-14	1.7704							PGM2L1	2.15001e-09	3.36341	SH3BGRL2	0.0345459	1.81201				WDR36	4.42435e-13	3.70336
620	2610305D13RIK	4.13531e-14	1.59817							SFRP5	2.15348e-09	1.61538	RNF38	0.0346409	1.6864				RPS18	4.56494e-13	2.30998
621	TCHH	5.70471e-14	1.50722							5730508B09RIK	2.17283e-09	2.80876	GM23722	0.0348005	2.11611				RANGRF	4.83234e-13	2.47533
622	ZFP827	6.25347e-14	1.65715							IRF8	2.20993e-09	3.0696	GM13305	0.0348608	1.59501				IPO4	4.88548e-13	2.26418
623	THRSP	9.099e-14	1.52764							VEGFC	2.2902e-09	2.13294	FZD2	0.0349042	1.56936				PSMG2	4.94812e-13	1.82571
624	BC016548	1.36637e-13	1.71301							DHX58	2.55422e-09	2.84895	PPP2R3A	0.0349996	1.6564				INF2	5.07004e-13	2.89144
625	SNCB	1.61798e-13	1.59211							APOD	2.82877e-09	1.52134	FAM199X	0.0351703	1.66197				EIF1AX	5.16992e-13	1.59398
626	ELFN1	2.55632e-13	1.66933							UBD	2.88865e-09	6.47011	CENPP	0.0352568	1.56111				TSPAN32	5.4748e-13	4.79525
627	CCDC67	3.16956e-13	1.62843							ASAP2	3.19073e-09	2.27162	ARHGAP26	0.0354133	1.94279				ALG3	5.49961e-13	2.38737
628	LRRC9	3.38651e-13	1.717							THBS2	3.87544e-09	2.23563	CELSR1	0.0354336	1.75711				GCLM	5.915e-13	2.4508
629	2810433D01RIK	4.0911e-13	1.65181							ZBTB16	3.94333e-09	2.21719	SEMA3G	0.0356952	1.85522				NOC2L	6.00022e-13	2.42826
630	TMEM139	4.52603e-13	1.53671							RRAD	3.98939e-09	2.84159	TOM1L2	0.035983	1.69415				RPS8	6.00058e-13	2.30455
631	CAR8	5.46812e-13	1.67364							LPAR4	4.12792e-09	2.53815	NEO1	0.0359832	1.79395				MRPL15	6.04038e-13	2.10625
632	RHCG	5.80026e-13	1.59517							SOCS1	4.24653e-09	3.20197	THRB	0.0364456	2.14404				VPS35	6.09848e-13	1.68671
633	SORL1	6.84429e-13	1.79426							RAB38	4.47999e-09	2.28499	IDS	0.0368161	1.77747				PDRG1	6.40694e-13	1.85712
634	GM11827	7.38091e-13	1.85553							BBC3	4.67946e-09	3.08574	LRAT	0.0369564	2.12019				MT2	6.42541e-13	3.58087
635	4933406I18RIK	7.80854e-13	1.6808							CKAP4	4.81787e-09	1.97832	A230107N01RIK	0.037299	1.50462				SLC11A2	6.51219e-13	2.66673
636	VSTM2A	8.56842e-13	1.51675							GM16701	5.06435e-09	2.9657	WNT5A	0.0374288	1.66282				PPP2R1B	6.8553e-13	2.91404
637	M5C1000I18RIK	9.87684e-13	1.58256							SIX1	5.83378e-09	2.33583	KCNJ16	0.0376576	1.9083				TNFRSF23	6.92809e-13	3.81877
638	TIAM2	1.48483e-12	1.57159							RP23-20G7.7	5.85167e-09	3.10654	PMAIP1	0.0378462	1.62297				MYO1D	7.32827e-13	6.40642
639	ATP10B	2.34071e-12	1.63311							GPT2	6.37446e-09	1.84064	COL2A1	0.0383676	1.67047				GFER	7.96991e-13	2.0711
640	CRYBA4	2.63744e-12	1.54513							CDC42EP5	6.71287e-09	2.08389	GM24620	0.0384679	1.53476				ERBB4	8.17437e-13	3.73755
641	CPNE4	3.02377e-12	1.65194							FBLN7	7.946e-09	2.33109	AASS	0.0397028	2.13867				NPM1	8.35688e-13	2.53169
642	6430562O15RIK	3.59492e-12	1.51777							GPRIN3	8.30494e-09	2.20363	ANAPC1	0.0397902	1.70657				FAM136A	8.38086e-13	2.14223
643	B3GALT5	3.76053e-12	1.66052							EGFEM1	8.60124e-09	3.0414	IL17RB	0.0398721	1.97368				EPT1	8.56887e-13	2.83011
644	A930012L18RIK	4.16027e-12	1.67186							BCHE	8.67528e-09	2.79174	CYBRD1	0.0399876	1.63373				GSR	8.75214e-13	2.02445
645	RIIAD1	4.57311e-12	1.79587							PPP1R12B	9.35532e-09	2.44576	VSNL1	0.0401065	1.70151				GAS2	9.35273e-13	2.94025
646	DACH1	5.35259e-12	1.58934							HOXD4	1.02089e-08	3.00797	SLC9A8	0.0406381	1.78523				EMILIN1	9.41779e-13	3.82888
647	USH1G	1.42302e-11	1.55219							ASB2	1.0385e-08	2.61246	MTCL1	0.0408682	1.9108				HYPK	9.4245e-13	1.60412
648	D930028M14RIK	1.42888e-11	1.62564							TMEM43	1.05392e-08	2.10415	RPTOR	0.0410271	1.78208				PARVB	9.59525e-13	4.95303
649	AGER	2.36666e-11	1.54963							XKR4	1.07265e-08	2.77044	SLC1A3	0.0410455	1.66915				AKT1S1	9.6014e-13	1.90311
650	1110017D15RIK	2.54705e-11	1.71197							SDC1	1.07701e-08	2.09672	SGSH	0.0410549	1.56139				ADAMTSL2	9.6327e-13	2.49384
651	D030025P21RIK	4.77352e-11	1.64451							ACTN3	1.08847e-08	3.07706	INTS6	0.041057	1.83276				MANF	9.63437e-13	2.37623
652	GSTA2	5.46274e-11	1.52484							SLC44A1	1.10199e-08	1.58728	HPCA	0.0412912	1.52724				KPNA2	9.85038e-13	2.83137
653	DYNLRB2	7.41067e-11	1.64101							STXBP6	1.21352e-08	2.52779	COL4A5	0.0416411	1.91819				GM128	1.02464e-12	1.94648
654	FLRT1	1.41966e-10	1.55812							MEGF6	1.29117e-08	2.63293	GM17501	0.0418156	1.90039				DDX10	1.03061e-12	3.42945
655	RNF32	1.45749e-10	1.6687							MCFD2	1.30575e-08	2.10668	EML5	0.0419444	2.12125				TPM4	1.03142e-12	1.70688
656	NSUN7	2.42994e-10	1.51135							CTTN	1.32395e-08	1.82665	SUCO	0.0420468	1.69514				ATP6V1E1	1.04702e-12	2.0364
657	PLIN1	3.41131e-10	1.55374							FAM213B	1.34081e-08	2.08159	PPP1R12C	0.0421177	1.585				KATNBL1	1.07192e-12	2.45323
658	STK33	3.64697e-10	1.59002							TBRG1	1.35604e-08	1.86636	MANBA	0.0429507	1.85463				AK5	1.09624e-12	3.46727
659	DCAF12L1	4.96811e-10	1.58883							SGCE	1.38484e-08	1.90482	TMEM127	0.0431264	1.61986				ATP2B1	1.11184e-12	2.2925
660	MISP	5.43609e-10	1.53842							BCL3	1.41164e-08	2.69257	GTF3C1	0.0431402	1.66043				POLR3D	1.11535e-12	2.60321
661	GM13496	6.88454e-10	1.55121							XBP1	1.42986e-08	1.86507	GRAMD1C	0.0431843	1.89409				CLDN14	1.13792e-12	2.88166
662	GAREML	1.31478e-09	1.56293							HOXD8	1.45179e-08	2.62126	FARP1	0.0437235	1.77388				BC027582	1.16942e-12	2.5654
663	NECAB3	1.38284e-09	1.60711							CCDC37	1.4943e-08	2.75555	SORCS2	0.0439787	1.54016				C2CD2L	1.22817e-12	2.57388
664	POU3F3OS	1.97935e-09	1.58037							GM14488	1.50865e-08	2.75653	THBS3	0.0440147	1.60375				MED22	1.2305e-12	2.37882
665	RGS7	2.33856e-09	1.52124							KLF5	1.53249e-08	2.55981	ENPP1	0.0442807	1.55889				RPL7A	1.24156e-12	2.33747
666	GM4876	2.72784e-09	1.5023							PDLIM2	1.62639e-08	2.42376	TLN2	0.044373	1.55774				CENPT	1.24311e-12	2.58109
667	SLC18A2	1.60365e-08	1.58039							SLC2A4	1.72803e-08	2.96579	USP35	0.0446098	1.52813				FTL1	1.37596e-12	2.07401
668	TESC	3.4123e-08	1.50925							KCNN2	1.92615e-08	2.38984	ABL1	0.0447404	1.61984				REXO2	1.57726e-12	1.84147
669	SERPINB5	6.02537e-08	1.5362							ANG	1.97719e-08	2.9393	SHROOM3	0.0450755	1.91491				SPTLC2	1.58302e-12	1.97705
670	4932443I19RIK	3.53047e-06	1.60947							PSMB9	2.31049e-08	2.38496	RHPN2	0.0456069	1.94183				PLEKHA8	1.62872e-12	2.7484
671	CALB1	0.000111952	1.56895							DEFB25	2.3413e-08	1.69127	DAAM2	0.0461762	1.61601				GNL2	1.69258e-12	2.11404
672	VPREB3	0.717764	1.72333							LGALS9	2.36898e-08	2.7185	GPC6	0.0465097	1.75583				SLC52A2	1.72037e-12	2.60567
673										COL28A1	2.38687e-08	1.93209	NF1	0.0466161	1.64523				GM5428	1.80506e-12	1.94319
674										GM14636	2.48399e-08	3.18748	LRSAM1	0.046664	1.80543				ARMC6	1.81812e-12	2.64926
675										GM11110	2.51002e-08	2.71168	STMN2	0.0466905	1.85669				SMN1	1.94913e-12	2.04158
676										SERINC3	2.5702e-08	1.84472	RHOQ	0.0467064	1.85751				DCTPP1	1.95695e-12	1.84617
677										JADE2	2.61986e-08	2.71654	RIPK4	0.0468755	1.87974				AK1	1.96381e-12	1.79849
678										ARSI	2.86998e-08	2.14489	MLXIP	0.0471246	1.77561				RPS10-PS1	1.97714e-12	1.89927
679										RTN2	3.06712e-08	2.68019	LTC4S	0.0471838	1.67368				ARHGDIA	1.97894e-12	1.84576
680										GM15764	3.2822e-08	2.39621	ADAMTS10	0.0472126	1.75442				GMPPB	2.03048e-12	2.22671
681										MLKL	3.34119e-08	3.05202	STXBP5	0.0475842	1.78554				NRAS	2.06638e-12	1.65305
682										DNASE1L1	3.42114e-08	2.39258	ZMYM2	0.0478747	1.71585				MLEC	2.26925e-12	1.88602
683										CMPK2	3.54079e-08	2.90399	MARK1	0.0479631	1.55296				RPS3	2.28263e-12	2.37659
684										DTX3L	3.70404e-08	2.83798	FSBP	0.0483953	1.65485				PPP1R14B	2.30792e-12	1.94747
685										MYOF	3.8824e-08	3.45935	CCDC37	0.048474	1.58631				PSMD2	2.31526e-12	1.54079
686										BATF2	4.03484e-08	2.78896	NUP153	0.0485117	1.74399				PDLIM2	2.32734e-12	2.87663
687										MAFF	4.1649e-08	2.74072	PRICKLE2	0.0485182	1.89229				NUDT21	2.41375e-12	1.57926
688										KLK10	4.24045e-08	2.70584	MYO9B	0.0487162	1.6267				RPS2	2.42079e-12	2.41178
689										BCAR1	4.76262e-08	2.34199	LRRC16A	0.0488434	1.70012				PSMA4	2.43753e-12	1.79067
690										CYSTM1	5.27362e-08	2.38856	GM21781	0.0490418	1.70879				NARS	2.57158e-12	1.70606
691										KLF9	5.49978e-08	1.79574	ADRA2A	0.0490849	1.53655				CBFB	2.58356e-12	1.88846
692										D430036J16RIK	5.67553e-08	2.32777	NPY	0.049187	2.49359				UXS1	2.58585e-12	2.14486
693										SERPINB6A	6.01027e-08	2.09398	PLBD1	0.0493876	1.62654				DRP2	2.68744e-12	4.62695
694										DAGLA	6.94222e-08	2.76951	CASC5	0.0494154	1.51187				KLRB1A	2.75192e-12	2.58036
695										P2RY2	7.56467e-08	2.09388	CNTN1	0.0494887	1.69128				EEF1G	2.85049e-12	2.24925
696										4732491K20RIK	7.63636e-08	2.45062	ZIC4	0.0495093	1.71886				PSMA5	2.86581e-12	1.52335
697										PPP2R2B	7.85294e-08	2.14875	CHST11	0.049633	2.01906				2810004N23RIK	2.879e-12	2.17265
698										PLEKHA5	7.96431e-08	2.42565	GPRC5C	0.0496468	1.83619				NUP62	2.92819e-12	2.58332
699										TFAP4	8.46838e-08	2.39504	FHL1	0.05004	1.66401				BRIX1	3.08308e-12	2.41719
700										GM10638	9.61309e-08	2.89984	PHKB	0.0501046	1.65175				PMP2	3.2183e-12	4.36143
701										TRIP10	1.10682e-07	2.25791	TTC18	0.050136	1.77003				BAX	3.22976e-12	1.66803
702										KDELR3	1.14782e-07	1.98232	TRPV4	0.0502104	1.73808				A430105I19RIK	3.23567e-12	4.23087
703										DBN1	1.17883e-07	2.00064	GM16973	0.0504109	1.8032				AP2A2	3.29665e-12	2.01769
704										S100A8	1.23766e-07	1.82104	ZCCHC14	0.0504227	1.64969				SERINC5	3.33593e-12	2.01565
705										TNIP2	1.24729e-07	2.37786	FREM2	0.0506243	1.90913				DUSP19	3.34258e-12	2.30952
706										TMEM237	1.25108e-07	1.87478	SMIM1	0.0507401	1.64019				AEN	3.35152e-12	2.11807
707										RAB3D	1.39851e-07	1.97325	ATXN7	0.0508361	1.67183				PROSC	3.48821e-12	2.12551
708										KLF10	1.43956e-07	2.29695	5730405O15RIK	0.0510617	1.71432				TMEM126A	3.50988e-12	1.50963
709										CAV3	1.51422e-07	1.97713	OSBP	0.0515277	1.6236				CHCHD1	3.53683e-12	1.63434
710										SH3YL1	1.64966e-07	2.4729	FBXL19	0.0516289	1.95326				RPL27	3.63972e-12	1.98175
711										TMCC2	1.73088e-07	2.57997	EIF2AK4	0.0516491	1.99105				RCAN2	3.86727e-12	2.48539
712										H2-DMA	1.97997e-07	2.43076	LGR5	0.0523116	1.69498				HSPA8	3.99569e-12	2.31197
713										RSRP1	1.98232e-07	1.50792	NRTN	0.052509	1.94017				TMEM206	4.00878e-12	2.48939
714										LMNA	2.00042e-07	1.66607	B3GNT4	0.0529354	1.69053				FAM129B	4.08002e-12	2.11006
715										PRR5	2.22892e-07	2.27571	ZFP740	0.053009	1.78059				GAR1	4.31649e-12	1.925
716										PITPNM2	2.30468e-07	2.76682	SEMA4A	0.0530304	1.72489				SYTL2	4.32715e-12	4.34589
717										TRIM12A	2.34649e-07	2.60721	AU040320	0.0531962	1.78279				PDIA6	4.4311e-12	2.60962
718										APBA2	2.36703e-07	2.39572	TIMP4	0.0533933	1.50726				CTPS	4.52882e-12	3.08491
719										DRAM1	2.37703e-07	2.8207	RGMA	0.0539284	1.5727				LACTB	4.83633e-12	2.54273
720										MRPL33	2.44263e-07	1.66476	GM27184	0.0540313	1.65272				S100A6	4.96151e-12	2.20583
721										CMBL	2.45256e-07	2.60119	KHDRBS2	0.0543784	1.53333				IL10RB	4.99372e-12	1.68511
722										COL4A2	2.55293e-07	1.96057	CAR1	0.054615	1.53768				RPS12-PS3	5.08141e-12	1.85155
723										IRF9	2.77404e-07	2.08119	SAMD1	0.0556763	1.61404				VDAC2	5.13537e-12	2.33194
724										MYL12A	2.80389e-07	1.6328	INTS1	0.0557634	1.53441				SLC6A8	5.14366e-12	1.93227
725										IL16	2.90794e-07	2.87153	CLCN6	0.0558533	1.66173				RPL5	5.30899e-12	2.41703
726										RTP4	3.55109e-07	2.11038	USP19	0.0567005	1.70398				1700007G11RIK	5.72836e-12	5.29096
727										MTURN	3.74251e-07	2.5381	PRKACB	0.056994	1.64773				CD97	5.89787e-12	2.86028
728										ATOH8	3.98971e-07	2.56319	SLC1A1	0.0573916	1.61544				IVNS1ABP	6.15208e-12	1.80228
729										TMEM45A	4.00078e-07	2.61669	SETD1A	0.057436	1.81143				RPS12	6.36488e-12	2.16984
730										RGS8	4.05808e-07	1.50488	GM4189	0.0579068	2.07422				MRPL57	6.76481e-12	1.77206
731										SAA1	4.20195e-07	2.0109	1190002N15RIK	0.0584034	1.63336				EDEM2	7.18021e-12	1.76388
732										FOXP1	4.39974e-07	2.05251	ZFX	0.0589438	1.68455				DDX56	7.54852e-12	2.07037
733										IER3	4.46458e-07	2.40062	IGFBP3	0.0593737	1.78525				AKAP6	8.07537e-12	2.20577
734										COL4A1	4.64902e-07	2.02402	TTR	0.0596936	1.77363				CLVS1	8.36694e-12	3.55412
735										MBOAT1	4.71488e-07	2.76275	KCNJ13	0.0598976	1.51545				SEC61A1	8.91424e-12	1.86818
736										6330416G13RIK	4.72518e-07	2.64273	FMNL2	0.0599438	1.72128				USP50	9.442e-12	1.69204
737										POC1A	4.8217e-07	2.31054	RORC	0.0601024	1.83352				TMEM74	9.79805e-12	6.17136
738										EFS	4.98036e-07	1.90857	MDGA2	0.0605831	1.88749				PHB	9.90549e-12	1.90699
739										SESN1	5.20927e-07	2.06701	DNAJC27	0.0611333	1.60817				COPS5	1.01459e-11	1.56317
740										RAI2	5.31537e-07	2.2644	BRSK2	0.0614488	1.71735				RBM34	1.01587e-11	1.95821
741										WDR66	5.35489e-07	2.2608	MAST3	0.0614871	1.62318				AK2	1.07563e-11	2.07496
742										NEDD4L	5.45411e-07	2.71772	ASPM	0.0615765	2.02778				RPSA-PS10	1.07657e-11	2.05232
743										FAM132A	5.53481e-07	1.75329	ATP11A	0.0620275	1.57399				TNFAIP8L1	1.09256e-11	1.52598
744										NTN1	5.9471e-07	2.60434	FANCA	0.0624962	1.57627				MGAT4B	1.10546e-11	1.95515
745										2010005H15RIK	6.05274e-07	2.95263	MICALL1	0.0626115	1.60106				CHID1	1.12517e-11	1.95954
746										PRX	6.32325e-07	2.12363	MAP3K5	0.0628668	1.52483				EIF4E2	1.13375e-11	1.78351
747										IFIT2	6.67117e-07	2.71521	MDK	0.0630825	1.63644				TXNDC9	1.14073e-11	1.66391
748										KRT23	6.81813e-07	2.26361	SHISA7	0.0632434	2.01146				NAE1	1.14594e-11	2.09263
749										CXCL9	7.42555e-07	7.95251	AMPD2	0.0635242	1.63528				YWHAG	1.15999e-11	1.89575
750										IRF2	7.73666e-07	2.05038	MYO16	0.0636435	1.99135				DIMT1	1.17515e-11	2.63073
751										SH2D3C	7.74139e-07	2.99588	CYP26B1	0.0640658	1.67345				EHD4	1.22128e-11	2.12433
752										GM16168	9.47901e-07	2.12048	TSPYL3	0.0641884	1.68295				UBE2F	1.30088e-11	1.96041
753										PLEKHO1	1.02473e-06	1.91209	RALGAPA2	0.064517	1.54258				MRPS22	1.32157e-11	2.28045
754										PHLDB3	1.07592e-06	2.62558	PLEKHG2	0.0647132	1.73859				WDR77	1.36479e-11	2.33334
755										ARHGAP31	1.0966e-06	1.9584	ELAVL2	0.0648366	1.88716				UMPS	1.38268e-11	2.54302
756										PLOD3	1.1251e-06	1.83682	AW011738	0.0652217	1.60507				GOSR2	1.54608e-11	1.93077
757										DHRS7	1.13027e-06	1.9145	PLCXD3	0.0652659	1.52155				DUSP14	1.56342e-11	2.80045
758										DAP	1.13633e-06	1.81711	ERBB2IP	0.0654934	1.7035				ADAMTSL5	1.73059e-11	2.43322
759										TMEM221	1.36338e-06	2.67725	LY6C2	0.0655845	1.57555				EFHD2	1.81199e-11	2.09602
760										APOL9A	1.3717e-06	1.64397	ZXDB	0.0656247	1.85351				D17WSU104E	1.84024e-11	1.74768
761										KCNA6	1.38074e-06	1.62079	LMLN	0.0659802	1.72266				PRMT1	1.89354e-11	1.52324
762										FBXO24	1.41383e-06	2.10589	ASIC1	0.0665644	1.52859				DRG1	1.99995e-11	1.73365
763										CMTM7	1.42799e-06	1.99558	SLC9A6	0.0668426	1.76864				RPSA	2.25861e-11	2.25174
764										SLC2A3	1.46057e-06	2.57173	MID1	0.0669324	1.57659				NUFIP1	2.32776e-11	2.43848
765										FMO5	1.46349e-06	2.35324	PICALM	0.0676817	1.56195				ZPR1	2.35866e-11	1.94942
766										METTL20	1.47767e-06	2.50824	GM19705	0.0678125	1.86954				SPRYD4	2.4204e-11	2.71409
767										IFRD1	1.49086e-06	1.79368	MEGF11	0.0683409	2.18167				COBLL1	2.42672e-11	2.52559
768										PNP2	1.53371e-06	2.28126	NBEAL2	0.068489	1.86825				MYO5A	2.51468e-11	2.77942
769										1810062G17RIK	1.75403e-06	2.6912	FMO2	0.0686848	1.50743				PTTG1IP	2.56128e-11	4.06003
770										2019-03-04	1.7641e-06	1.69733	ADCY6	0.0689197	1.77766				RTKN	2.58343e-11	1.72502
771										FGF5	1.87443e-06	2.48793	TMEM56	0.0689707	1.94189				2310058D17RIK	2.68373e-11	2.35552
772										CAMKK2	1.89035e-06	2.26924	CLDN15	0.0693359	1.53883				MMADHC	2.69287e-11	1.72467
773										GM15234	2.03303e-06	2.23847	TMEM229B	0.0695111	1.67895				SCO2	2.72003e-11	2.7508
774										IER2	2.17139e-06	2.53157	D15ERTD621E	0.0699115	1.63602				AP1M1	2.81422e-11	1.83765
775										CTNND1	2.18425e-06	2.18811	COL19A1	0.070312	1.60615				TMEM19	2.8895e-11	1.91124
776										GNAI1	2.21562e-06	2.08098	GM14286	0.0707414	1.6267				PDE8B	3.03211e-11	4.14101
777										DDX60	2.25968e-06	2.94235	SDK1	0.0708286	1.93309				HSPA5	3.09042e-11	3.04139
778										TMEM154	2.33724e-06	2.40413	COX4I2	0.0712852	1.66677				SLMO2	3.45446e-11	1.75151
779										HN1	2.41378e-06	1.86686	BRPF1	0.071402	1.58612				MYO1E	3.47115e-11	2.40292
780										TGM2	2.49786e-06	3.12802	PCDHB9	0.0727385	1.67331				RALA	3.50634e-11	1.68106
781										RHBDF2	2.53071e-06	2.0966	HHAT	0.0734085	1.56486				RPL17	3.53171e-11	2.21092
782										RBPMS	2.75548e-06	2.33878	MYZAP	0.0735761	1.65925				MVP	3.6122e-11	1.71958
783										E230001N04RIK	2.89713e-06	2.44888	AW549877	0.0742668	1.71696				NUDCD1	3.71458e-11	3.96958
784										BMP2K	2.94199e-06	3.06155	ETV6	0.0748461	1.59994				IMP4	3.77398e-11	1.69256
785										ATL1	2.94687e-06	2.19311	1700109H08RIK	0.0754093	1.50692				SPECC1	3.89749e-11	2.10381
786										TNFSF12	2.97052e-06	1.92639	SMG1	0.0754355	1.72046				TRMT10C	3.92572e-11	2.06699
787										AKAP2	2.9783e-06	2.0511	UHRF1BP1	0.076148	1.79859				PRMT3	4.01747e-11	2.05695
788										MVB12B	3.17052e-06	1.85317	STEAP2	0.0764063	1.66692				SSR4	4.01872e-11	1.67752
789										LOXL1	3.33509e-06	2.12873	LRIG2	0.0765946	1.90156				CARS	4.09436e-11	2.06248
790										NME4	3.35784e-06	2.64689	ADORA1	0.0766242	1.83159				ACSL1	4.15442e-11	3.00127
791										TXNDC5	3.70709e-06	1.75724	PM20D1	0.0766275	1.84025				SLC7A1	4.31274e-11	5.04422
792										TJP2	3.94592e-06	2.67295	NSMAF	0.0768877	1.62614				PFDN4	4.44624e-11	1.54967
793										RGS16	4.24501e-06	3.08127	DYNC1H1	0.0773727	1.67584				PREB	4.50089e-11	1.84377
794										SFXN3	4.30712e-06	1.83139	SGMS2	0.0788108	1.83167				RPP25	4.53609e-11	3.4409
795										1700113H08RIK	4.71591e-06	2.1827	ADAMTS7	0.0788549	1.76307				CKS1B	4.66307e-11	2.70446
796										PEX5L	4.83706e-06	1.8045	CADPS	0.0792981	1.5388				RPS27L	5.00778e-11	2.01467
797										PPP2R2A	4.96888e-06	1.69937	CNTNAP1	0.0795423	1.54768				DNAJB2	5.14042e-11	2.33753
798										NAPEPLD	5.09422e-06	2.26078	XLR4B	0.0800162	1.62654				TACO1	5.53699e-11	3.7181
799										DGAT2	5.42868e-06	1.71678	GM17597	0.0801342	1.65302				COX17	5.96957e-11	1.6373
800										KIF5A	5.62706e-06	2.53368	ZFP335	0.0815093	1.77206				RPL10-PS3	6.02724e-11	1.93971
801										NUAK2	5.78614e-06	2.89509	VWA8	0.0818354	1.63575				RANBP1	6.05595e-11	1.98808
802										DNPH1	5.96375e-06	2.45923	AVL9	0.0821247	1.7037				RNF126	6.08533e-11	2.10357
803										CD200	6.07708e-06	1.50089	GPR137B-PS	0.0827638	1.59433				KNOP1	6.14642e-11	2.07902
804										RIPK2	6.41814e-06	2.14239	ABCD3	0.0828289	1.54622				LY96	6.21068e-11	2.55296
805										GSE1	6.4691e-06	2.20274	4931429P17RIK	0.0832396	1.80287				2410131K14RIK	6.39159e-11	2.59345
806										MOB3B	6.60131e-06	2.36876	PDE4C	0.0841152	1.74834				GEMIN6	6.43638e-11	2.37273
807										AIDA	6.7479e-06	2.10147	BZRAP1	0.0845113	1.50927				LSM8	6.57247e-11	1.60674
808										AATK	6.9433e-06	1.62856	LEMD3	0.084542	1.71703				FURIN	6.71982e-11	2.58743
809										MYO1C	8.13103e-06	2.3202	GM23887	0.0850102	1.63162				TAGLN	7.10725e-11	3.31511
810										1500015O10RIK	8.22351e-06	1.65738	ERAP1	0.0851569	1.55412				VAMP8	7.24894e-11	2.40769
811										ASPHD2	8.71291e-06	2.2013	ISL1	0.0851949	1.80998				POLR1D	7.28806e-11	1.839
812										B4GALT1	9.26618e-06	2.78412	SGSM2	0.0852252	1.50733				IARS	7.49966e-11	2.38331
813										PLEKHF2	9.44118e-06	2.08105	SAP130	0.0854411	1.5225				SERBP1	7.67739e-11	2.11574
814										TNFAIP8	9.47012e-06	2.02417	ARFGEF1	0.08547	1.62205				NUPR1	8.0951e-11	4.5547
815										SYNE1	9.49907e-06	2.24209	PRKDC	0.0855865	1.52057				CIAPIN1	8.30342e-11	1.88852
816										LPGAT1	1.00467e-05	2.19157	GRID1	0.0865836	1.69133				D430019H16RIK	8.42181e-11	2.80162
817										SRGAP1	1.04276e-05	2.4686	KCNIP3	0.0874222	1.56933				STX12	8.60337e-11	2.05354
818										1700025G04RIK	1.07189e-05	1.73606	SPP1	0.0875867	2.1603				ZFP57	8.69664e-11	3.22445
819										GRB14	1.07618e-05	1.80364	PLEKHA8	0.0876168	1.61618				CYCS	9.02609e-11	1.85017
820										TUBB3	1.13848e-05	2.30629	TTPA	0.0877417	1.93885				TIAL1	9.36019e-11	1.80558
821										S100A9	1.16427e-05	1.6917	COX7A1	0.0877645	1.72108				FAM207A	9.4105e-11	2.14008
822										CACNA2D1	1.22408e-05	2.77537	KLHL3	0.0885802	1.59225				NOP16	9.57604e-11	1.97388
823										EYA4	1.2667e-05	1.75453	DOCK6	0.0886401	1.54762				TXNL4A	1.00154e-10	1.78228
824										STARD5	1.30038e-05	1.79017	PITPNC1	0.0886677	1.74415				RPL6	1.0307e-10	2.05602
825										BC005764	1.36104e-05	2.76705	DPF3	0.0888536	1.81195				HSPA4	1.0337e-10	1.82761
826										PTEN	1.42136e-05	1.88568	HIPK1	0.089168	1.58368				CHMP6	1.04185e-10	1.67215
827										ADAM33	1.48074e-05	1.78973	PLA2G4A	0.0893537	1.79255				SCFD1	1.06269e-10	1.70552
828										ARHGEF19	1.61001e-05	2.04087	TLCD1	0.0897448	1.59279				ADCY1	1.0712e-10	3.00599
829										COLGALT1	1.63325e-05	1.79798	TMTC4	0.0897919	1.76692				PSMC4	1.12679e-10	1.5105
830										CD274	1.64392e-05	2.55521	GM26981	0.0898399	1.79417				KDM7A	1.13353e-10	2.21842
831										DMTN	1.65999e-05	2.28958	NAAA	0.0904318	1.56091				DLAT	1.15279e-10	1.64971
832										ARRDC1	1.69999e-05	2.31227	GM15821	0.0909487	1.60576				RPS20	1.24281e-10	2.12765
833										PRR5L	1.79231e-05	2.45101	GM26566	0.0913695	1.57267				GPR137B	1.26216e-10	3.18238
834										ARSK	1.80429e-05	2.1645	GM16352	0.0915495	1.51341				ATP6V0D1	1.2742e-10	1.59699
835										CAMK2B	1.87449e-05	2.13946	ANK2	0.0919888	1.78708				FUBP1	1.306e-10	1.65865
836										CLEC2D	1.95999e-05	2.90369	NIPAL3	0.0923191	1.57354				IKBKG	1.31236e-10	3.01451
837										PXK	2.03582e-05	2.04184	CD48	0.0926864	1.51047				GPR176	1.32859e-10	2.48346
838										TENM1	2.05335e-05	2.03559	MOGAT1	0.092755	1.66019				MAK16	1.36766e-10	2.14281
839										MIR17HG	2.09193e-05	2.39294	SLC41A1	0.0927703	1.57087				RPL27A	1.41361e-10	1.93523
840										KLF4	2.2384e-05	2.38808	TBX6	0.092891	1.60076				RPL23	1.43338e-10	2.15946
841										ARTN	2.28991e-05	1.74911	PEAK1	0.0929837	1.58229				HSPA9	1.52589e-10	1.79658
842										SCARF2	2.29226e-05	2.30329	PLEKHA7	0.093034	1.52814				ZBTB8OS	1.52819e-10	2.02141
843										CFL2	2.40939e-05	1.68048	EPS15	0.0936964	1.62874				ADSL	1.55326e-10	1.90165
844										GCNT2	2.48834e-05	2.27214	PFKFB3	0.0946146	1.90601				ATP6AP2	1.5997e-10	2.0037
845										EGR1	2.6262e-05	2.61653	DDX26B	0.0946309	2.03697				SGSM3	1.64186e-10	2.18883
846										HAP1	3.1582e-05	1.92072	IPO9	0.0947166	1.57089				SMG9	1.66083e-10	1.91742
847										CCDC80	3.29548e-05	1.96631	4930403O15RIK	0.0951218	1.89815				SERPINB6B	1.72001e-10	2.26085
848										OSMR	3.34257e-05	2.78379	KBTBD8	0.0952579	1.61152				NMT1	1.74429e-10	1.51578
849										PTER	3.39909e-05	2.18994	UNC13D	0.0953083	1.73008				CLIC1	1.81197e-10	2.03517
850										RASSF1	3.42014e-05	1.91972	SNX19	0.0955689	1.63859				2019-09-09	1.84185e-10	1.74329
851										DSE	3.43303e-05	2.9984	BAHD1	0.0956136	1.66964				MED8	1.86658e-10	1.73446
852										PARP16	3.44613e-05	2.2581	FGFR3	0.0968906	2.06379				SLC25A51	1.92422e-10	1.57895
853										METRNL	3.75078e-05	1.67054	PRPH	0.097159	1.78372				RPL32	1.93067e-10	2.05173
854										EDA	4.2812e-05	2.66465	NCKAP5L	0.0971637	1.91303				RPL22	1.96178e-10	1.87145
855										A4GALT	4.47087e-05	3.50911	GCNT1	0.0973397	1.50794				FTSJ3	2.00135e-10	1.90402
856										D630003M21RIK	4.47417e-05	2.94367	ST6GALNAC2	0.0983138	1.5605				6330403L08RIK	2.0362e-10	3.83251
857										CHST8	4.49554e-05	1.95692	SFT2D2	0.0986002	1.53918				GM16174	2.08402e-10	4.35008
858										DPEP1	4.50125e-05	2.32824	SMEK1	0.0986228	1.64277				ABCA1	2.12887e-10	2.16625
859										G6B	4.56709e-05	1.85557	HUWE1	0.0986942	1.60102				ADH7	2.13065e-10	3.1174
860										IGSF10	4.57272e-05	2.68388	MTM1	0.0987466	1.64569				BANF1	2.15013e-10	1.71372
861										GM5532	4.92532e-05	1.77314	FAM73A	0.0990286	1.61634				PSMD6	2.16925e-10	1.5615
862										ZFP703	5.09902e-05	2.107	ATP13A1	0.0991324	1.60581				FBXO6	2.17167e-10	1.66955
863										TTC9	5.15313e-05	1.84028	CLEC14A	0.0994553	1.63705				FARSA	2.20406e-10	1.75475
864										PDE8A	5.2033e-05	2.03286	VPS13D	0.0997987	1.51757				EEF1B2	2.28746e-10	1.84159
865										TRIM35	5.87942e-05	1.88052	MPP5	0.10007	1.56394				VCP	2.37643e-10	2.01424
866										REEP5	6.08214e-05	1.66466	PYROXD2	0.100622	1.56368				AVPI1	2.42704e-10	1.83202
867										SIRPA	6.15573e-05	2.03995	SLC24A3	0.100843	1.61606				SEH1L	2.43382e-10	2.05011
868										P4HB	6.18867e-05	1.73084	TLR4	0.101056	1.91913				CASQ1	2.60673e-10	3.80408
869										FGF2	6.33915e-05	2.45945	GM4353	0.101552	1.85059				RPL4	2.6777e-10	2.11963
870										GDA	6.5119e-05	2.75649	SALL2	0.101794	1.68863				DCAF13	2.68851e-10	1.93685
871										IMPDH2	6.74926e-05	1.5677	NOVA1	0.102428	1.71016				EXOSC1	2.72215e-10	1.86982
872										NOD1	6.79182e-05	2.24851	ZDHHC5	0.102585	1.51636				ELOVL1	2.75717e-10	2.11576
873										H2-Q10	7.04677e-05	2.30546	PLA2G5	0.103482	1.73831				TPM3	2.85001e-10	1.83565
874										ISG20	7.86985e-05	1.91508	NEK9	0.104437	1.50995				RRS1	2.87003e-10	2.04266
875										MAST2	7.88647e-05	1.96847	EXT1	0.104903	1.58653				TXNL1	2.93043e-10	1.72129
876										XDH	7.91775e-05	2.71037	MAP3K7	0.104909	1.57679				FAM96B	3.05466e-10	1.83276
877										RCN3	8.0197e-05	1.69907	ILDR2	0.105132	1.56846				BPNT1	3.09738e-10	2.05503
878										NMI	8.29266e-05	2.03939	CD27	0.105566	2.19548				GM10116	3.2127e-10	1.74296
879										ENPP4	8.30126e-05	2.1696	PALD1	0.105741	1.71024				COQ4	3.24968e-10	1.82812
880										LGR6	8.39971e-05	2.27113	ZFP507	0.105905	1.86438				PTCD3	3.37134e-10	2.50715
881										FOXD2	8.42283e-05	2.60176	SLC14A1	0.106276	1.51453				KCTD13	3.39186e-10	1.83183
882										PLXDC2	8.64326e-05	1.75166	AMY1	0.107765	1.92819				KLHDC2	3.4607e-10	1.52501
883										SHANK1	8.65613e-05	2.05812	ARHGEF33	0.107766	1.50779				RABIF	3.47848e-10	1.77523
884										CABP4	8.69002e-05	1.546	DVL1	0.108412	1.64736				PLEC	3.58744e-10	1.72427
885										CAPNS1	9.025e-05	1.54953	F8	0.108412	1.68647				ELP5	3.61764e-10	1.73167
886										FAM111A	9.18964e-05	2.84222	ZFP691	0.108453	2.2638				LRRFIP2	3.78508e-10	2.57229
887										B3GNT8	9.36957e-05	2.04452	GM13139	0.108711	1.58347				CLTB	4.04447e-10	2.08073
888										SORD	9.46985e-05	2.10224	NUP98	0.108996	1.68922				TTL	4.05709e-10	2.16754
889										TVP23BOS	9.62497e-05	2.36116	SLC38A11	0.10944	1.69315				ATF4	4.21361e-10	2.30544
890										KRT1	9.63685e-05	1.89324	GM17388	0.109498	1.66239				RPL31	4.25255e-10	2.00966
891										EPHB6	9.82141e-05	1.96371	EDEM3	0.109543	1.70959				NEK6	4.34439e-10	1.96277
892										SMPD5	0.000100854	2.28194	RBL2	0.109935	1.53174				NCL	4.38239e-10	2.2803
893										ABCA9	0.000101443	2.4625	ACSS1	0.109992	1.5722				MAGOHB	4.59951e-10	1.86276
894										MAPK9	0.000110099	2.19997	2500004C02RIK	0.109995	1.83236				MAG	4.6112e-10	1.85531
895										GALM	0.000112549	2.13087	SUZ12	0.110068	1.64311				SH3BGRL3	4.67045e-10	1.69913
896										NCLN	0.0001155	1.91093	GM17750	0.112163	1.79887				TSFM	4.90154e-10	1.77277
897										AP1S2	0.000116105	2.12025	SLC7A6	0.112667	1.75211				CHST11	4.97433e-10	4.65138
898										ATP9A	0.000122575	2.0117	PEG10	0.113211	1.63634				TARS	5.02597e-10	1.78555
899										ESPL1	0.000122889	2.35506	ANGEL1	0.113703	1.62592				GM10073	5.19907e-10	1.80113
900										MAF1	0.000123257	1.95786	GM20444	0.113924	1.57316				RPL19	5.24831e-10	1.97414
901										MAGEB16	0.000123995	2.31811	PHLPP2	0.114147	1.68269				RPS6	5.34384e-10	1.96782
902										NINJ1	0.0001248	1.68561	PLEKHA6	0.114481	1.68265				MTAP	5.41919e-10	2.17696
903										S1PR3	0.000128115	2.00447	ERBB4	0.11449	1.63572				MYCN	5.44532e-10	3.64303
904										NUDT4	0.000132055	1.78935	COLGALT2	0.114874	1.87592				EEF1A1	5.45643e-10	1.86886
905										ARL10	0.000138305	2.31358	IREB2	0.115428	1.59678				OSTF1	5.47209e-10	1.52918
906										CDC42SE1	0.000138576	1.74566	RREB1	0.115943	1.5427				STK39	5.47314e-10	2.0782
907										APLF	0.000144075	2.30919	GM26669	0.116541	1.52291				RPL13A-PS1	5.49398e-10	3.5584
908										GM26867	0.000159471	1.83753	FOLH1	0.116701	1.72545				ACBD3	5.60952e-10	1.90691
909										GK5	0.000162486	2.3401	USP31	0.117059	1.74806				GM9844	5.67486e-10	3.27005
910										PLN	0.00016614	1.78416	PCLO	0.117447	1.73467				UBE2N	5.70059e-10	1.92517
911										SLFN9	0.00016727	1.87212	SPRED3	0.117669	1.84774				LAMTOR3	5.72854e-10	1.58586
912										WNT5B	0.000170549	2.64245	TBC1D2B	0.117933	1.57811				DPP3	6.28105e-10	1.87571
913										IGF2BP2	0.000177326	2.53805	ERN1	0.11835	1.56794				MRPL12	6.33725e-10	1.68291
914										CEBPE	0.000177995	1.68533	LRPPRC	0.11915	1.59053				ABTB2	6.56696e-10	2.87551
915										ZFP110	0.000182773	2.32135	A830010M20RIK	0.119597	1.94584				EHBP1L1	6.57816e-10	2.4903
916										LAPTM4B	0.000186373	1.76851	GM9825	0.120454	2.01015				DNAJB3	6.82454e-10	3.52761
917										CSTAD	0.000188265	2.02818	DNAH7B	0.120866	1.735				HYOU1	6.90902e-10	3.0712
918										CYP2D22	0.000188524	2.20625	NWD1	0.120892	1.69964				WDR5	7.08766e-10	2.77831
919										PYCR1	0.000191625	1.91567	ZFP704	0.120948	1.63893				ABHD12	7.4542e-10	1.84997
920										GAL3ST1	0.000192085	1.71568	ZFP710	0.121218	1.59084				PHB2	7.72347e-10	1.60886
921										9130017K11RIK	0.000198178	1.74868	RDH10	0.121306	1.52879				RPS11	7.91706e-10	1.97054
922										IVNS1ABP	0.00020124	1.63064	SAMSN1	0.12169	1.61013				METTL22	8.10851e-10	2.35213
923										SOX11	0.000206516	1.78261	GPR133	0.122018	1.50409				PLA2G7	8.15715e-10	2.34831
924										HS3ST3A1	0.000206954	2.06598	CAR8	0.123995	1.726				RRAGC	8.15767e-10	1.71482
925										ATP2C1	0.000207078	2.03115	AFTPH	0.124432	1.53442				MOSPD1	8.74943e-10	1.56783
926										IFITM7	0.000207251	2.2118	CTDSPL	0.126031	1.60348				1700123M08RIK	8.91999e-10	3.86306
927										CCNJL	0.000217586	2.17084	SCD3	0.126464	1.61197				DUSP22	9.21856e-10	2.05482
928										DISP1	0.000228676	2.81137	NEURL4	0.127313	1.84528				RFX1	9.2646e-10	3.088
929										NFKB2	0.000232251	1.83977	SCAP	0.128107	1.55377				LSM2	9.54117e-10	1.65019
930										5830415F09RIK	0.000232261	2.39848	GLCCI1	0.12816	1.91911				TRAF2	1.00453e-09	2.14423
931										STAT2	0.00023312	2.10107	HOXB3	0.128578	1.65897				BIN3	1.03826e-09	1.66452
932										CD302	0.000246647	2.07669	POU6F1	0.129138	1.61658				CCNE2	1.04934e-09	6.29566
933										ZFAND4	0.000249421	2.44773	PSD3	0.129222	1.56015				PARL	1.07533e-09	1.56685
934										SLC25A24	0.000262553	2.60553	TTC9B	0.13062	1.57946				NAA25	1.0909e-09	2.30064
935										GPX7	0.000267914	1.66162	ERMP1	0.130848	1.60194				BC024978	1.11398e-09	3.38647
936										KCNH2	0.000274307	1.97184	PPP1R9A	0.131807	1.66175				RPLP1	1.12292e-09	2.10229
937										NR2F2	0.00027962	1.79024	CD69	0.132214	1.54571				VCAN	1.14289e-09	4.03185
938										IL6ST	0.0002908	1.91866	NAV3	0.133073	1.60396				RPL14	1.14385e-09	1.82414
939										ZFP395	0.000300915	2.18494	TRIP12	0.133092	1.59823				CTSD	1.14734e-09	3.3556
940										ZFP90	0.00030709	2.24115	IBA57	0.133239	1.84431				GART	1.21726e-09	1.83907
941										BOC	0.000309402	1.81323	LTF	0.133528	2.04274				UFM1	1.30735e-09	1.63557
942										LY6G6F	0.000313926	2.26257	USP7	0.133764	1.66324				PMM2	1.31853e-09	2.19905
943										FRMD8	0.000321726	1.73901	DCAF12L1	0.134116	1.64411				ANXA4	1.35395e-09	1.66608
944										TRIM3	0.000328712	2.09169	AP1G1	0.134739	1.8037				KAZN	1.37825e-09	3.50552
945										SAMD14	0.000333921	1.97184	KIF7	0.134815	2.11455				SAC3D1	1.40905e-09	1.68529
946										IRS2	0.00034436	2.07048	LAMA4	0.135463	1.61794				IL1RAP	1.44358e-09	2.02835
947										WRN	0.000347702	2.24349	AGRN	0.13581	1.51191				PRMT5	1.45955e-09	1.6146
948										CIITA	0.00036028	1.66594	ZFP641	0.135813	1.77392				NOP10	1.52051e-09	1.76942
949										TSC22D3	0.00036611	1.80806	F830016B08RIK	0.136521	1.69316				CPSF3L	1.56803e-09	1.71795
950										CREB3L1	0.000366379	2.0052	CYLD	0.136968	1.76451				TOR2A	1.57058e-09	1.78335
951										ACSL1	0.000375681	2.52728	GM16279	0.137633	2.12361				ABCE1	1.61418e-09	1.88543
952										PLAC9A	0.000396266	2.2703	WDR36	0.137896	1.66681				SCPEP1	1.62264e-09	1.91391
953										MAN1B1	0.000397492	2.00362	FAM168B	0.138351	1.51629				SPCS3	1.63487e-09	1.64212
954										KLHL8	0.000398386	2.10963	SRC	0.139103	1.64512				MPHOSPH10	1.66425e-09	1.81591
955										TTYH2	0.000407508	2.16364	SOS1	0.141313	1.56886				CSNK1D	1.67338e-09	1.59713
956										CHST14	0.000421522	1.94282	SUFU	0.14194	1.88884				TTC27	1.68988e-09	2.44124
957										4931413I07RIK	0.000447868	1.84378	GM26814	0.142151	1.72745				PEAK1	1.71065e-09	2.97698
958										ANKS1	0.000452862	1.83537	HOXB6	0.142653	1.54156				TAGLN3	1.7131e-09	4.4981
959										CEP170B	0.000463291	2.28504	BC034090	0.144127	1.50147				EIF3G	1.74099e-09	1.76349
960										LYPD6B	0.000482381	2.42833	ZFHX4	0.144572	1.53881				LARS	1.75465e-09	1.76177
961										RARA	0.000487833	1.7105	NLGN1	0.14469	1.58509				SRSF2	1.82613e-09	1.8904
962										CDK18	0.000488858	1.83227	ZBTB18	0.144886	1.73527				ARF4	1.82671e-09	1.81712
963										FIGN	0.000488916	1.68762	ELK4	0.145067	1.55724				RPS17	1.85535e-09	2.0432
964										GBP4	0.000491065	2.4961	KIF21B	0.145523	1.66811				CCDC115	1.88778e-09	1.77195
965										PLOD1	0.000492181	1.64161	FBXO2	0.146137	1.5071				KDR	1.89116e-09	3.87956
966										TRIM14	0.000499288	2.05926	SMURF2	0.148546	1.5923				GTF2H1	1.89813e-09	1.77082
967										SLITRK5	0.000507783	1.99348	DPP8	0.148646	1.67435				LSM7	1.89868e-09	1.58752
968										TGFBR3	0.000517132	1.92437	DPYSL5	0.148858	1.58646				MRPL45	1.95924e-09	1.71486
969										KCNU1	0.000521273	2.10503	LLGL1	0.148891	1.61045				WDR43	1.97147e-09	2.54772
970										FRMD4A	0.000540797	1.83673	AGPAT5	0.148906	1.58522				NANS	1.98504e-09	1.52412
971										PDLIM1	0.000549591	2.47775	PCDH18	0.149379	1.70603				GM15417	2.02083e-09	1.82681
972										MTHFS	0.000553622	1.97014	NPTN	0.151057	1.70588				AHSA2	2.02786e-09	1.9089
973										EEF2K	0.000561423	1.94302	CHSY1	0.151071	1.6044				ACYP1	2.09955e-09	1.82023
974										FAM189B	0.000561955	2.05433	PAN3	0.152465	1.79404				RPS3A1	2.14492e-09	1.96608
975										THAP2	0.000574106	2.01117	TMEM82	0.152818	1.66563				SNAPC2	2.22591e-09	1.78453
976										ABCB1B	0.000586644	2.17823	SLX4	0.153143	1.92439				UTP11L	2.24536e-09	1.54551
977										MLLT3	0.000590182	1.96703	ELOVL6	0.15343	1.61548				RPS10	2.26008e-09	2.00571
978										MIR1931	0.000594298	2.19148	CHDH	0.153568	1.87067				SFXN3	2.36994e-09	1.50831
979										PADI2	0.000610929	2.19872	AFF4	0.154695	1.52552				SHQ1	2.37675e-09	3.30392
980										RP23-281H4.7	0.00062133	2.09019	2610305D13RIK	0.154701	1.944				WISP1	2.39074e-09	3.73813
981										PCDH1	0.000629523	2.04002	RAB33A	0.15501	1.68732				RENBP	2.44691e-09	2.01815
982										CRYGN	0.000691878	1.61839	1700017B05RIK	0.155171	1.59819				IFRD2	2.47875e-09	2.10204
983										LIPC	0.00069895	1.5603	CTIF	0.155623	1.71671				EMC4	2.65077e-09	1.79319
984										KCNA2	0.000700289	2.29618	ANK1	0.1562	2.07696				USP14	2.69045e-09	1.84262
985										RFTN2	0.000712731	1.71239	ULK2	0.156292	1.56574				UBE2E1	2.74138e-09	1.7211
986										RDH12	0.000720854	2.13828	NCKAP5	0.156423	1.69643				MRPL37	2.75065e-09	1.8018
987										SLC2A10	0.000722827	2.34686	CTF1	0.156813	1.66279				NEXN	2.76296e-09	3.88807
988										ZBED5	0.000723329	2.2792	ZAK	0.157599	1.62346				EEF2	2.82706e-09	2.03577
989										GNG8	0.000723396	2.17612	SLC6A1	0.15834	1.72435				CNPY3	2.83918e-09	1.54486
990										DNAIC2	0.00075858	1.95952	IQSEC1	0.159576	1.62704				RPL24	2.84149e-09	1.85599
991										STAMBP	0.000762565	1.87416	CMTR2	0.159869	1.52505				ITPK1	2.89626e-09	1.62663
992										DUSP23	0.00077893	1.98686	RAB8B	0.160453	1.56328				BIN1	2.90806e-09	1.72006
993										JUP	0.000786456	2.04464	LRP1B	0.161922	1.69641				ARL1	3.08458e-09	1.61788
994										TRIOBP	0.000792292	1.80963	BC016548	0.162003	1.65016				SLC35E4	3.08531e-09	1.87037
995										THAP3	0.000800665	1.7968	DYRK1A	0.162051	1.61997				MAPK1IP1L	3.09912e-09	2.14255
996										BMP1	0.000803897	1.71966	MAGI3	0.16212	1.69734				GM13205	3.1347e-09	2.78795
997										RFXANK	0.000818451	1.98309	PAPD7	0.162562	1.65289				OPN3	3.2247e-09	3.56472
998										D16ERTD472E	0.000823982	2.2543	DDR1	0.162619	1.57635				PLXNA1	3.27643e-09	2.71202
999										NFKBIB	0.000863005	1.81731	VPS54	0.162647	1.72612				SCARB2	3.3405e-09	1.62814
1000										PARP9	0.00091157	2.02035	AA474408	0.162719	1.92767				HEXA	3.39487e-09	1.81264
1001										TAP1	0.000966552	2.04337	RPAP1	0.164263	1.66141				MAPK8IP1	3.39908e-09	1.9624
1002										ACOT10	0.000984662	2.12689	NHS	0.164524	1.66097				CDSN	3.47749e-09	2.08084
1003										DYNLRB1	0.000990232	1.83582	PATL1	0.164825	1.51836				USP15	3.59027e-09	2.26692
1004										SH3GLB1	0.000995156	1.72938	GM1661	0.165043	1.64217				BZW2	3.60231e-09	1.88902
1005										GM13157	0.000999032	2.19343	SCN3B	0.165684	1.60511				RPS7	3.64751e-09	1.97736
1006										2810474O19RIK	0.00101368	2.05751	AACS	0.166085	1.52417				TMEM70	3.68323e-09	1.70618
1007										ZBTB38	0.00102043	1.84023	CTRL	0.166324	1.55225				RPL38	3.73505e-09	1.91304
1008										CAST	0.00103983	1.97955	TMEM45B	0.167381	1.52177				FAM214B	3.75342e-09	2.43659
1009										WNT10A	0.00107435	2.13647	CHEK1	0.168109	1.57545				NASP	3.79221e-09	2.20918
1010										A330017A19RIK	0.00109473	1.94699	CDH13	0.16815	1.51243				PHLDA3	3.83278e-09	1.5655
1011										4930599N23RIK	0.0010996	2.0924	AGBL2	0.169228	1.59692				COA5	3.90877e-09	2.10119
1012										MX1	0.0010999	2.20781	TSPYL4	0.169486	1.55797				LYRM1	4.03921e-09	2.42102
1013										GM26802	0.00110643	2.28781	SH3BP4	0.169564	1.71582				GNG2	4.05134e-09	1.88975
1014										RWDD2A	0.00111422	2.30319	ABCA4	0.169778	1.53889				GM16141	4.18565e-09	2.08443
1015										MARVELD1	0.00113686	1.79617	TTC17	0.170371	1.68691				TMEM117	4.2656e-09	3.07694
1016										UNC5B	0.00114601	1.6732	PPP1R3B	0.170672	1.67401				SAA2	4.43349e-09	2.81322
1017										RASGEF1B	0.00116241	2.36718	DLG4	0.171531	1.58009				AR	4.43603e-09	2.19247
1018										ARHGEF10	0.00117205	1.73731	PDE11A	0.172106	1.52308				UBE2M	4.43882e-09	1.83955
1019										TCP11L2	0.00119732	1.82664	DPY19L1	0.172275	1.53401				DHRS3	4.48226e-09	1.54082
1020										HIP1R	0.00126032	2.30133	TSPAN3	0.172956	1.53838				HECW2	4.74431e-09	2.7183
1021										PRRG1	0.00128098	1.95811	SETDB1	0.173666	1.52254				SLC16A13	4.77915e-09	2.61796
1022										LIPA	0.00129838	2.12079	GM13830	0.175335	1.80532				RPS5	4.80847e-09	1.81035
1023										TERF1	0.00130216	1.97804	GM16794	0.17573	1.54924				OSBPL5	4.86418e-09	2.01353
1024										LEPREL1	0.00130893	2.28631	CCDC146	0.176224	1.56693				ALKBH3	5.00668e-09	1.88193
1025										TMEM109	0.00134543	1.76347	SHANK2	0.177635	1.96406				PSMB5	5.10227e-09	1.88005
1026										VRK2	0.00134988	2.15513	TMEM100	0.178164	1.65173				HAT1	5.1331e-09	2.14583
1027										RPS6KC1	0.00143099	2.2839	PLEKHM1	0.17873	1.54305				TIMM13	5.20612e-09	1.72597
1028										SLC44A2	0.00143308	1.78359	ZFP518B	0.178741	1.92504				UBE2J1	5.39237e-09	2.17039
1029										P4HA1	0.00146027	1.89785	TMIGD1	0.179962	1.5129				GLA	5.46348e-09	2.76232
1030										MMP15	0.00148922	1.82454	MME	0.179963	1.6904				RWDD4A	5.73379e-09	1.57197
1031										B230344G16RIK	0.00149747	2.15419	S100PBP	0.180099	1.58252				TMEM199	5.91325e-09	1.50839
1032										SLC25A32	0.00163057	2.15707	SP1	0.180414	1.6055				SLC22A23	5.96946e-09	1.82201
1033										TMEM200A	0.00165917	1.67718	GRIN1	0.180706	1.62701				SPC24	5.97998e-09	4.56234
1034										MAPK14	0.00174751	1.90897	SCG3	0.183182	1.54713				JAGN1	6.32383e-09	1.63054
1035										ECE2	0.00175537	2.08035	ZNF512B	0.183797	1.56445				INO80E	6.45402e-09	1.76983
1036										SERPINA3F	0.0017607	2.16512	RP23-218F13.7	0.184461	1.51331				RPL18	6.5232e-09	2.02282
1037										MIRG	0.00176105	1.88284	CHIL1	0.184796	1.72843				CDC34	6.64098e-09	1.96004
1038										LDLRAD4	0.00176189	2.49609	TMEM2	0.185183	1.80816				1810055G02RIK	6.70876e-09	1.78062
1039										GM17315	0.00177064	1.84324	SOCS7	0.185656	1.51548				PCMT1	6.74744e-09	1.69168
1040										ADRBK2	0.00179918	1.92604	9930014A18RIK	0.186305	1.93121				GM10146	6.964e-09	2.98523
1041										DNAJC12	0.00185153	1.85852	GFM2	0.186348	1.73958				SNHG3	6.99635e-09	1.51372
1042										TAF5	0.00185789	2.04381	GM4221	0.186793	1.78649				RET	7.04744e-09	4.64254
1043										SLC48A1	0.00188646	1.90421	IRAK2	0.187337	1.51709				TPCN2	7.04802e-09	3.05344
1044										MTPAP	0.00191576	2.02447	MVK	0.187392	1.62955				ACAP2	7.12373e-09	1.70044
1045										AA467197	0.00193927	2.2222	ATP6V0A1	0.187674	1.52323				NUDT9	7.21904e-09	1.94383
1046										CSGALNACT2	0.00195054	2.26267	F11R	0.188453	1.54925				TBC1D15	7.2847e-09	1.73068
1047										RACGAP1	0.00196284	2.25894	AMPD3	0.18936	1.51141				PPID	7.48474e-09	1.69007
1048										EML1	0.00197743	1.94907	PER1	0.189409	1.50053				LAYN	7.52911e-09	2.33592
1049										2810430I11RIK	0.00199224	1.71091	CLTC	0.189514	1.5571				EIF3D	7.53933e-09	1.65703
1050										COL6A2	0.00204903	2.12889	UBE2H	0.191266	1.54407				RPS2-PS6	7.60462e-09	3.35155
1051										GPLD1	0.00209101	2.01698	LPIN2	0.191626	1.61402				A530013C23RIK	7.71181e-09	1.9331
1052										RP23-281H4.6	0.00212629	1.9323	DHRS13	0.192399	1.59228				MORF4L2	7.86417e-09	1.7071
1053										TSPAN4	0.00213483	1.62795	TRIM36	0.194133	1.53411				GALK2	7.92988e-09	2.31018
1054										HERPUD1	0.00214796	1.73895	RBM12B2	0.194962	1.79441				PRPF31	8.00097e-09	1.77308
1055										FAM49A	0.00214924	2.05062	WWC1	0.195605	1.68655				NAV1	8.3211e-09	2.02377
1056										AGPAT4	0.00220431	1.78995	CSMD2	0.195616	1.75466				RPL7	8.90814e-09	1.83857
1057										SEPN1	0.00223185	1.91915	RCC2	0.196184	1.55633				HSPH1	8.96436e-09	2.20213
1058										CCDC136	0.00224662	2.17209	GM15551	0.196805	1.73657				TCEB1	9.06287e-09	1.54758
1059										FAM161A	0.00227207	2.15363	MTX3	0.198422	1.63948				PODNL1	9.44851e-09	2.09752
1060										PRRT1	0.00228475	2.04243	CCDC148	0.198481	1.66968				RRP1B	9.50818e-09	2.87908
1061										SPATA6	0.00238813	1.76578	FNIP2	0.198773	1.50547				TTC39C	9.61326e-09	3.48813
1062										GM13404	0.0023882	1.70692	GM15851	0.199512	1.54456				DPH5	9.66233e-09	1.87587
1063										TMEM255A	0.0023997	1.50536	FHOD3	0.199668	1.53462				SYNCRIP	9.73688e-09	1.77904
1064										CRTAC1	0.00243713	2.0394	CALR4	0.199943	1.76207				SYNJ2	9.78308e-09	2.86417
1065										HIST1H1D	0.00244444	1.50213	GM17066	0.203489	1.96658				SLC25A5	9.78528e-09	1.84747
1066										GM26525	0.00246067	1.65608	DNAIC1	0.203942	1.84658				RPL13A	1.01245e-08	1.76325
1067										KLC3	0.00251744	1.90688	BCORL1	0.204153	1.63797				RPL10	1.03366e-08	1.77478
1068										NUDT13	0.00255272	1.93454	DSN1	0.204964	1.55971				GDI2	1.09072e-08	1.52244
1069										PRKG1	0.0025617	2.10141	CAMK2D	0.206792	1.52115				PINX1	1.09314e-08	1.99751
1070										NEGR1	0.00256787	1.86368	OSBPL8	0.207001	1.69208				RTN4	1.09483e-08	2.11426
1071										GM4951	0.00261552	1.87013	ARID1B	0.207016	1.57925				DENR	1.10477e-08	1.64871
1072										TLN1	0.00265384	2.01195	PCP4	0.20726	1.64813				HDAC5	1.12617e-08	1.60071
1073										SLC29A1	0.00271648	1.84909	IGKV14-111	0.207515	1.66389				AARS	1.13966e-08	1.58063
1074										ATP13A3	0.00276691	2.20184	OCRL	0.20816	1.511				SNRPD1	1.15339e-08	1.53581
1075										GPR133	0.00279814	1.93267	POMT2	0.208272	1.67478				PRKG2	1.18326e-08	2.94665
1076										FGF13	0.00280067	1.79397	TMEM194B	0.209412	1.57141				POLR2L	1.22296e-08	1.63094
1077										CBX7	0.00281484	1.87633	HDAC4	0.21005	1.6108				EIF3I	1.23243e-08	1.56501
1078										ARRDC3	0.00290537	2.58052	MTERF1A	0.2109	1.59278				HSF2BP	1.25424e-08	3.25251
1079										WEE1	0.00291349	2.09008	ZFP160	0.211348	1.62969				TNFAIP8	1.25457e-08	1.96809
1080										CALHM2	0.00292495	1.89264	RIMS1	0.211623	1.63643				2200002D01RIK	1.26825e-08	4.44416
1081										PCBD1	0.00293461	2.15193	DHRSX	0.212075	1.54407				RPS19BP1	1.30082e-08	1.76772
1082										DHRS1	0.00299699	1.73871	GM17705	0.2121	1.60985				HGS	1.31006e-08	1.77899
1083										FGFBP1	0.00300323	1.98821	GM5093	0.212263	1.82764				RPL28	1.33762e-08	1.86893
1084										ELL	0.00301442	1.92778	BIRC3	0.214949	1.53748				SHC1	1.34149e-08	1.86474
1085										FHL4	0.0031347	1.85855	FZD8	0.21555	1.62552				FAM210A	1.35948e-08	2.28546
1086										MGMT	0.00316745	2.58487	LACC1	0.217131	1.81706				FAM111A	1.3936e-08	4.25876
1087										RNF125	0.00324926	2.19002	MAOB	0.218422	1.68095				VDAC3	1.39697e-08	1.69615
1088										TBC1D17	0.00329746	1.77005	5730480H06RIK	0.219807	1.71861				GTF2F1	1.45484e-08	1.57261
1089										SLC29A3	0.00330062	2.06531	KIF13A	0.220255	1.62956				SCUBE1	1.5407e-08	3.71784
1090										TLCD2	0.00332802	2.15131	NANOS3	0.222336	1.7318				RPL10A	1.55254e-08	1.98238
1091										ARL4D	0.0033697	1.66753	PLD1	0.222702	1.5456				EIF5	1.5569e-08	1.53238
1092										FAM131C	0.00337869	1.7195	MAML1	0.223384	1.61518				PUS7	1.56537e-08	3.18963
1093										6330403L08RIK	0.00339077	1.88254	DENND1B	0.223443	1.69836				DNAH2OS	1.58171e-08	5.07841
1094										ABCG2	0.00339695	2.17271	GALNT3	0.223504	1.75594				RMND1	1.59727e-08	2.33128
1095										GGA2	0.0034634	1.93818	CD38	0.223886	1.58931				ARL2	1.59951e-08	1.5785
1096										TMEM19	0.00346697	1.92564	SLC5A3	0.224275	1.74844				EIF3J1	1.61808e-08	1.57925
1097										GM26652	0.00357639	1.67928	SH3BGR	0.225377	1.77581				DMTN	1.62604e-08	1.95803
1098										1700123I01RIK	0.00360984	1.71793	ST8SIA4	0.225969	1.68877				GM9493	1.63417e-08	1.78246
1099										F830016B08RIK	0.0036387	1.63719	CLYBL	0.22642	1.57361				RPS28	1.6556e-08	1.67399
1100										AK1	0.00366426	1.8128	SSH2	0.226579	1.51727				PAM16	1.719e-08	1.5198
1101										1200007C13RIK	0.00366817	1.70188	IYD	0.229503	1.84475				CDK17	1.72084e-08	1.81007
1102										AGRN	0.00366865	1.82569	A330048O09RIK	0.230088	1.71497				FAM57A	1.72811e-08	3.35981
1103										SEMA4D	0.00370834	2.35721	TMEM136	0.230188	1.78299				E130309D02RIK	1.80257e-08	2.09622
1104										ZFP455	0.00383598	2.23074	HMCN1	0.230466	1.83941				VKORC1L1	1.81959e-08	2.42936
1105										MMP16	0.00388472	1.88955	ZFP618	0.230918	1.74029				ATXN1	1.82502e-08	2.37233
1106										NUP37	0.00393669	2.01057	CCDC88A	0.231878	1.52473				CCDC86	1.90711e-08	1.84967
1107										SQSTM1	0.00394815	1.83047	RP24-62C22.1	0.233177	1.50849				ITGA11	1.99177e-08	2.78711
1108										BACE2	0.00398334	1.82073	SLC4A1	0.233189	1.70538				MYO1C	2.00814e-08	2.42058
1109										GM9796	0.00401994	1.79596	GRIFIN	0.234187	1.53614				PRRC1	2.01007e-08	2.31298
1110										3632451O06RIK	0.00402039	1.62644	CAMSAP1	0.234594	1.56038				NRADD	2.02803e-08	1.71109
1111										LASP1	0.00405946	1.85689	A330021E22RIK	0.235346	1.60049				PSME3	2.03401e-08	1.68454
1112										MFGE8	0.00407719	1.71397	WFDC17	0.235547	1.54425				NOB1	2.07002e-08	1.83158
1113										HDX	0.00409907	2.08363	ABCA3	0.235734	1.50309				HCN1	2.0944e-08	3.5227
1114										A830019P07RIK	0.00420407	1.98203	PMVK	0.240223	1.58667				MARS	2.11799e-08	1.60314
1115										TFRC	0.00422255	1.98842	SLC16A1	0.242009	1.58101				PQLC1	2.12814e-08	2.4022
1116										GCNT1	0.0042705	2.17924	COL25A1	0.242176	1.84568				UCKL1	2.30499e-08	1.82696
1117										RELB	0.00433332	1.87744	ZFP354C	0.242187	1.74107				MLX	2.30917e-08	1.58571
1118										NKAIN2	0.00434612	1.77298	ECE1	0.24333	1.56986				HRAS	2.33018e-08	2.00651
1119										DNAJB1	0.00447919	2.06731	AFF1	0.243661	1.82801				MFSD5	2.34407e-08	1.66757
1120										LRRC8E	0.00450437	2.17975	GRIN3A	0.244054	1.82217				ZFP668	2.48636e-08	2.2835
1121										FAM57A	0.00452506	2.02051	TMEM81	0.244336	1.66656				RASL10A	2.53464e-08	2.26033
1122										DDX20	0.00467144	2.04311	PLA2G6	0.244356	1.75574				BDH1	2.55221e-08	2.10206
1123										PARP10	0.00469772	1.97169	KLHL21	0.246528	1.56533				BACE2	2.5613e-08	2.78019
1124										SPRY2	0.00474967	2.40361	CLEC16A	0.247041	1.53481				ASNSD1	2.56262e-08	2.04047
1125										MESDC1	0.00481766	1.81207	KCNA4	0.247477	1.68637				MRPL40	2.58237e-08	1.67016
1126										PLEKHG1	0.00484004	1.95249	RPS6KA3	0.247611	1.53223				PFKFB4	2.61791e-08	3.41071
1127										ZFP575	0.0048686	1.92245	GDPD2	0.248055	1.65343				PDE8A	2.67418e-08	2.29548
1128										TRAF2	0.00503071	1.79086	TMEM29	0.251903	1.60806				AFG3L2	2.70057e-08	1.78461
1129										GM15598	0.00522264	1.94873	0610009E02RIK	0.252702	1.5436				EIF3E	2.7714e-08	1.5198
1130										TRAM2	0.00541619	2.22774	KCND1	0.252882	1.61058				EIF2B1	2.84734e-08	1.98977
1131										5330426P16RIK	0.00542972	2.26004	ZFP772	0.253336	1.98902				TACSTD2	3.01471e-08	1.91186
1132										RADIL	0.00563899	1.92325	ZPBP	0.253451	1.63551				ILF2	3.04804e-08	1.53529
1133										MB21D1	0.00569613	1.85449	PLOD2	0.254039	1.66307				RNF141	3.21825e-08	1.89396
1134										TGFB1	0.00574229	1.79841	GM14391	0.25432	1.77309				GHDC	3.23317e-08	1.83574
1135										MAN1A	0.00583811	2.80625	DDO	0.25452	1.51897				EZR	3.26009e-08	1.96411
1136										MXD4	0.00589503	1.67961	CLCN2	0.255175	1.54936				GAPDH	3.31412e-08	1.93871
1137										SLC2A12	0.00592236	2.14657	COL23A1	0.256932	1.59762				SHKBP1	3.31729e-08	2.03166
1138										GM15535	0.00599423	2.17765	LARP4	0.257101	1.55643				CTU2	3.43885e-08	2.18479
1139										1500009L16RIK	0.00600209	2.7518	MAPK1IP1L	0.257278	1.50932				RPL8	3.44132e-08	1.79882
1140										CMYA5	0.00602734	1.99067	GSAP	0.257593	1.61053				FKBP1A	3.46278e-08	1.76884
1141										ITGAV	0.00615472	1.80443	CDC42BPG	0.258715	1.69923				PCNA	3.47719e-08	1.50941
1142										ST6GALNAC5	0.00617001	2.51915	SENP1	0.261852	1.56088				GM3550	3.64913e-08	3.05974
1143										AGAP1	0.00623327	1.82679	EIF4G3	0.262323	1.64897				PACS2	3.68417e-08	1.5838
1144										RP24-167M10.2	0.00624172	1.99307	GM26584	0.26455	1.54416				SPP1	3.81998e-08	2.95151
1145										MST1R	0.00637146	1.66779	PPP6R3	0.265098	1.67007				RPL39	3.82544e-08	1.77164
1146										TRIM30D	0.00641736	1.64754	SUGP2	0.266053	1.5196				NACA	3.86552e-08	1.77601
1147										NLRC5	0.00644884	2.2001	2410089E03RIK	0.267094	1.66033				PLK2	3.94879e-08	2.45615
1148										GTPBP8	0.00645045	1.97016	RP23-402K24.5	0.267724	1.54057				IQSEC3	4.16644e-08	1.91508
1149										WDR47	0.00659923	2.17066	FAM19A1	0.268811	1.51879				HSPB2	4.22962e-08	1.96713
1150										BIRC2	0.00660164	2.0872	SLC4A7	0.269999	1.51459				SLC27A4	4.26763e-08	2.01817
1151										STK32C	0.0066337	2.07387	TEX2	0.271771	1.5733				PRKRIP1	4.32701e-08	1.79793
1152										TACR2	0.00667753	2.13298	1810041L15RIK	0.27234	1.64681				MIR22HG	4.40632e-08	2.18871
1153										LIMK1	0.00668993	1.80318	KCNC3	0.272377	1.518				SLC35B4	4.47209e-08	2.07306
1154										RBP4	0.00669264	1.96531	GNMT	0.272414	2.64781				HOXA4	4.48461e-08	2.58084
1155										PKP2	0.00674631	1.85573	LRRC16B	0.272932	1.80502				RPS15A	4.49963e-08	1.77996
1156										LEPREL2	0.00686414	1.82246	TTPAL	0.274214	1.55066				NCBP1	4.5611e-08	2.28267
1157										C030005K06RIK	0.00698255	1.6888	LENG8	0.274527	1.56535				PPP2R3C	4.56536e-08	1.75701
1158										NAT8L	0.00700607	2.36934	SLC15A2	0.274759	1.66898				SERGEF	4.71049e-08	2.22785
1159										FLNA	0.00705056	1.51218	MCM3AP	0.275309	1.50264				ACTR1A	4.80895e-08	1.5292
1160										SAMD9L	0.00707386	2.19192	DOCK4	0.276421	1.54942				QSOX2	4.81953e-08	2.55261
1161										FKBP10	0.00708867	1.63179	RBM46	0.276448	1.57256				D19BWG1357E	4.85043e-08	1.64819
1162										FAM72A	0.00720398	2.11345	RIMS3	0.277488	1.98914				BHLHE41	4.89817e-08	2.52331
1163										4632428N05RIK	0.0072642	2.04658	LTN1	0.277784	1.59716				RPL35	5.06387e-08	1.77143
1164										CDK2AP2	0.00730889	1.64419	NMNAT2	0.280333	1.62567				FGFBP3	5.35848e-08	1.87026
1165										C77080	0.0073798	2.01914	TTBK2	0.2815	1.62003				CRELD1	5.40335e-08	1.51075
1166										SLC43A3	0.00740448	1.66177	ANXA11	0.281613	1.64429				RPL7L1	5.48209e-08	1.73497
1167										WNT9A	0.00751182	1.91169	CAND1	0.282219	1.58527				BC106179	5.51938e-08	2.83159
1168										RP24-326K11.2	0.00755527	1.87791	D630024D03RIK	0.28271	1.56343				GFM1	5.54e-08	2.00889
1169										CFB	0.00762031	1.74358	ZFP169	0.283266	1.52773				TRMT6	5.56377e-08	2.00782
1170										VAV2	0.00769993	2.28839	DTNA	0.28564	1.51255				RBM38	5.58582e-08	2.39893
1171										PNPLA7	0.0077628	2.17623	GM11747	0.286688	1.52268				GIPC1	5.72738e-08	1.5555
1172										CREB3L2	0.00802424	1.75934	PRSS53	0.286729	1.58507				BC027231	5.87984e-08	3.4295
1173										GM14446	0.00807431	1.94352	2510016G02RIK	0.288525	1.57965				CCR1	6.10877e-08	1.73499
1174										TSPYL1	0.00819311	1.88919	CD55	0.289688	1.75337				UFSP2	6.13236e-08	1.65325
1175										1190002F15RIK	0.00820095	2.12151	MYOC	0.289944	1.54737				ZFP622	6.35644e-08	1.66449
1176										LEFTY1	0.00822101	2.04918	ZFP871	0.290913	1.50766				CNIH1	6.75752e-08	1.64274
1177										GRN	0.00826187	1.59576	AVIL	0.291094	1.54449				ACTR1B	6.76735e-08	1.64376
1178										4933426M11RIK	0.00826569	2.1302	GUCY2G	0.291808	1.66233				DPYSL3	6.91938e-08	1.95173
1179										LRRC20	0.00834054	1.87515	TRAPPC8	0.292444	1.5804				RPS14	7.02095e-08	1.64829
1180										JMJD1C	0.00843079	2.01099	SNX33	0.294849	1.55527				PSMD1	7.2213e-08	1.53532
1181										ALDH1A7	0.00847591	2.34753	SMARCA1	0.295722	1.82728				TAF12	7.26738e-08	1.52082
1182										PTPRJ	0.00857916	1.90603	PPP1R26	0.29714	1.54446				PSMC3	7.31181e-08	1.72631
1183										LRRC52	0.00866134	1.85477	SYNPO	0.297929	1.61683				KPNA4	7.36028e-08	1.75285
1184										PCDH7	0.00866777	2.07977	CCDC151	0.298429	1.66953				TES	7.42067e-08	5.34561
1185										SOX8	0.00886643	1.70762	RTN1	0.298706	1.53754				UQCRC1	7.42366e-08	1.60312
1186										HILPDA	0.0089152	2.01463	GPR143	0.299449	1.54511				CPA2	7.43571e-08	2.65563
1187										CBLC	0.00893181	1.65519	FNDC7	0.299936	1.56044				RPL13	7.43615e-08	1.5385
1188										KLF8	0.00895834	1.95803	GM12258	0.300972	1.72958				NUP35	7.56382e-08	1.88843
1189										5830444B04RIK	0.00904283	1.99492	ZFP407	0.302298	1.52706				FEN1	7.64497e-08	2.85793
1190										HIF3A	0.00922278	2.09627	KPNB1	0.302819	1.5256				PGK1	7.65178e-08	1.5484
1191										FXYD6	0.00942131	1.76681	IDE	0.305102	1.50824				DUS2	7.85335e-08	1.98335
1192										BTRC	0.00946823	1.85115	A930024E05RIK	0.307479	1.53922				GM13251	8.37961e-08	2.9624
1193										RRAS	0.00968787	1.71418	ARHGEF4	0.307739	1.50321				POU2F3	8.49891e-08	1.51569
1194										RASL12	0.00983416	2.15181	SLC26A2	0.308289	1.63356				SSRP1	8.5226e-08	1.51883
1195										CELF2	0.0102051	1.72175	MED14	0.308367	1.73821				DCTD	8.70505e-08	3.44447
1196										OSBPL3	0.010259	1.74819	SETX	0.308905	1.52654				PSMA1	9.17247e-08	1.64631
1197										RNF19A	0.0102825	1.96813	KMT2C	0.30896	1.51926				STK17B	9.2323e-08	2.74257
1198										B830012L14RIK	0.0103286	1.61483	SMCR8	0.309019	1.73181				NUP85	9.24127e-08	2.11243
1199										TMPRSS5	0.0104919	1.68921	GDAP1	0.30908	1.69666				SYT13	9.30265e-08	1.5691
1200										PRICKLE3	0.0105586	1.96198	GM20204	0.310061	1.59703				RPS19	9.36349e-08	1.74025
1201										SMC6	0.010603	1.83021	PODXL	0.310105	1.9352				ERO1L	9.36913e-08	1.93362
1202										USP27X	0.0107011	2.04002	MPRIP	0.310551	1.50982				NDUFAB1	9.50867e-08	1.59011
1203										ITPRIPL2	0.0107082	1.95844	CCL7	0.311158	1.53532				GMPR2	9.5286e-08	1.88571
1204										5031414D18RIK	0.0108816	2.01004	WFIKKN2	0.311273	1.59226				ATP6V1D	9.67372e-08	1.59841
1205										WDR59	0.0109472	2.003	MLLT4	0.314602	1.82796				DPAGT1	9.67997e-08	1.92123
1206										MNDA	0.0109736	1.50163	SLC36A1	0.315941	1.56443				ATF1	9.94238e-08	1.91605
1207										EXOG	0.0112448	1.8792	TECPR2	0.316142	1.55633				HMCES	9.98275e-08	2.0825
1208										RTKN	0.0113568	1.55998	USP32	0.316198	1.6277				APEX1	1.00272e-07	1.66824
1209										B3GALNT1	0.0114109	2.04544	PGAP1	0.316551	1.59706				CCDC101	1.00812e-07	1.69155
1210										GM527	0.0114116	1.77724	FAT4	0.317124	1.70575				SEC23IP	1.01387e-07	2.27381
1211										3110009E18RIK	0.0114407	1.95306	STARD4	0.318242	1.51984				AP1S2	1.05925e-07	1.95069
1212										MGAT2	0.0114789	1.71133	TBC1D24	0.318346	1.71048				FH1	1.06816e-07	1.55295
1213										XRRA1	0.0115007	1.66399	GM20417	0.318363	1.59647				COL7A1	1.06969e-07	2.77836
1214										ZFP125	0.0115305	1.83216	FAM213A	0.319275	1.63977				ADSS	1.10787e-07	1.77232
1215										WFDC17	0.0118553	2.09387	CXCR2	0.321014	1.60942				MAGOH	1.11733e-07	1.56606
1216										B3GALT1	0.0120455	1.59102	TAGLN3	0.321027	1.59461				MAPK11	1.13381e-07	4.56222
1217										ATP2B4	0.0121092	1.70872	MIOS	0.321659	1.65112				RCL1	1.13544e-07	1.54642
1218										A830009L08RIK	0.0122021	1.89184	HIPK3	0.322369	1.52674				RSLCAN18	1.14247e-07	1.67229
1219										PELO	0.0124193	1.81814	RPN1	0.322533	1.54317				MINPP1	1.17437e-07	1.53238
1220										PRPS2	0.0125324	1.93473	TMEM168	0.322556	1.63898				1810059H22RIK	1.18176e-07	5.26995
1221										GNG4	0.012642	1.7051	PAQR9	0.322848	1.55892				CCDC43	1.20142e-07	1.94207
1222										ZFP39	0.0128338	2.38245	PHXR4	0.323748	1.51118				NFKBIB	1.22579e-07	1.53433
1223										SHISA5	0.0129099	1.51601	SLC52A3	0.323967	2.02053				PPP1R2	1.24036e-07	1.66395
1224										BRINP1	0.013101	1.53833	JPH3	0.324777	1.59488				GM21967	1.24087e-07	2.70413
1225										RGS2	0.0131994	1.68049	PIKFYVE	0.325179	1.63636				PRSS36	1.27224e-07	2.88284
1226										SHQ1	0.0134013	1.92258	ROBO2	0.32521	1.71392				ARPC1A	1.33859e-07	1.97275
1227										SFRP2	0.0134771	2.22893	INTS2	0.329161	1.63015				RPL36A	1.34532e-07	1.58064
1228										JADE3	0.0135574	2.08831	GUCY1B3	0.329582	1.52446				TPT1	1.35754e-07	1.76558
1229										CD276	0.0135774	2.09379	SLC4A3	0.329635	1.62354				TGDS	1.36285e-07	1.89767
1230										DPYSL2	0.0136056	1.67516	PIRT	0.329979	1.64636				MRPS10	1.3809e-07	1.54351
1231										P4HA2	0.0141089	1.67179	PRR14L	0.332383	1.67242				FAF1	1.38466e-07	1.5791
1232										CTSO	0.0143209	1.70274	CSF1	0.332611	1.5338				ERDR1	1.38496e-07	1.75122
1233										MTUS1	0.0144615	1.88681	INPP5A	0.333975	1.5386				SRSF3	1.39905e-07	1.59906
1234										FLT3L	0.0147235	1.88946	DNAJB12	0.334821	1.57699				ARHGAP24	1.42316e-07	1.77879
1235										CCL2	0.0147673	6.40608	SS18L1	0.335503	2.13824				DTNBP1	1.42787e-07	1.56224
1236										TUFT1	0.0147806	1.67051	CHIC1	0.336056	1.58925				EYA3	1.43164e-07	2.88863
1237										DUSP7	0.0149602	2.05678	COG3	0.336217	1.59231				ARPC2	1.44051e-07	1.55038
1238										TRIM59	0.0149928	1.83093	SCN8A	0.337682	1.5219				RPLP2	1.46178e-07	1.74521
1239										ZUFSP	0.0150307	2.21297	ZDHHC21	0.339377	1.52237				GPRC5B	1.4635e-07	1.78517
1240										PDIA5	0.0150558	2.5523	PIGM	0.341378	1.58871				BC003965	1.47684e-07	1.77974
1241										MFSD10	0.015188	1.71515	GPM6A	0.342278	1.50258				RPS13	1.49285e-07	1.8918
1242										VSTM2B	0.0152657	1.79365	LARP4B	0.343246	1.5179				PGAM5	1.50214e-07	2.21329
1243										ARNTL	0.015414	1.95521	HYOU1	0.344084	1.83468				OTUD7B	1.54e-07	1.88172
1244										ARHGDIA	0.015802	1.5103	NCAN	0.344889	1.74196				BID	1.55819e-07	3.81019
1245										PRKCE	0.0158577	1.91726	MIB1	0.345271	1.59958				WDR95	1.56112e-07	2.85816
1246										CATSPERG1	0.0158927	1.60463	DHX35	0.34543	1.57209				RAB22A	1.57002e-07	1.5062
1247										TMEM39A	0.0159055	1.75024	PITPNM1	0.345731	1.52761				MED19	1.5861e-07	1.83994
1248										SH3TC1	0.0163073	1.76044	ALDH5A1	0.345739	1.57098				SHMT2	1.59043e-07	1.82444
1249										MBNL1	0.0163771	1.94262	ANGPTL1	0.346535	1.80639				HCCS	1.61278e-07	1.56577
1250										SECISBP2L	0.0172062	1.52802	WDR11	0.348422	1.67559				GALNT10	1.63691e-07	2.54398
1251										CELF5	0.0172179	1.94347	FUOM	0.348917	1.50803				POP4	1.6437e-07	1.69718
1252										A430105I19RIK	0.0174954	2.0482	SYT11	0.35027	1.57255				LACTB2	1.6544e-07	1.93085
1253										CLCA1	0.0177174	2.15895	MGST2	0.350491	1.74661				AATF	1.67031e-07	2.14402
1254										CDC14B	0.0178334	2.03457	TBC1D8	0.351253	1.67107				RBMXL1	1.69997e-07	1.83719
1255										HAUS3	0.0180996	2.16301	AHDC1	0.351328	1.56064				RPL9	1.70829e-07	1.71203
1256										ZC3H12C	0.0181742	2.02242	DHX33	0.351506	1.55233				3110040N11RIK	1.75087e-07	1.87538
1257										DUSP8	0.0183352	1.6448	BCL6	0.353427	2.04205				POLR3G	1.76325e-07	2.18189
1258										2010002M12RIK	0.0184351	1.62085	TNFRSF19	0.357236	1.54671				AGPAT2	1.80838e-07	1.62495
1259										CDKN2B	0.0185759	1.71632	A330023F24RIK	0.358509	1.56659				MSL3	1.80916e-07	1.72296
1260										XYLB	0.0187517	1.68138	CARF	0.361891	1.75645				FBXL13	1.87525e-07	1.54274
1261										CXCL2	0.0189859	1.53238	RRP12	0.362513	1.64871				THUMPD3	1.88868e-07	1.70031
1262										TMEM202	0.0190666	1.92363	SPRY4	0.364203	1.72282				UST	1.90905e-07	1.94827
1263										RHOJ	0.0191945	1.78412	ATR	0.365647	1.6322				MRRF	1.93888e-07	2.10987
1264										NCOA3	0.0192743	2.02277	PTPN21	0.368796	1.51336				GM8394	1.94127e-07	3.14467
1265										TRIM12C	0.0192918	1.88459	PRKAA2	0.369552	1.52001				APEX2	1.9701e-07	2.17414
1266										CROCC	0.0193813	1.69045	TNKS1BP1	0.372944	1.54338				COMTD1	2.00208e-07	1.66228
1267										PRRC1	0.0194954	1.78548	HDAC6	0.373097	1.52714				CAP1	2.0045e-07	1.54244
1268										SNRPB	0.0198352	1.52242	PRKAB2	0.376258	1.63372				FAM173B	2.03827e-07	1.72218
1269										TRPV2	0.0201245	2.00583	FGL1	0.377327	1.53431				A430005L14RIK	2.11238e-07	1.59501
1270										SLC6A9	0.0203278	1.83155	PAQR8	0.379511	1.6392				RUSC2	2.11478e-07	2.51155
1271										NR4A1	0.0204406	1.67043	BOC	0.37972	1.88955				RASAL2	2.12843e-07	1.68897
1272										TRIM34A	0.0208609	2.18104	IRGQ	0.379979	1.50862				NDUFAF4	2.14423e-07	1.82864
1273										RHBDF1	0.0209673	1.54754	LEPR	0.380287	1.51574				ZNHIT3	2.15052e-07	1.61922
1274										GM27022	0.0210007	1.77433	FOXRED2	0.381503	1.54372				NTMT1	2.17221e-07	1.7646
1275										CTPS2	0.0210195	1.77554	WHRN	0.382166	1.58202				AP3S2	2.22526e-07	2.32249
1276										PRDX4	0.0211436	1.71832	FAM208A	0.382586	1.5443				RPL37A	2.2965e-07	1.66816
1277										TMEM214	0.0212942	1.6861	EHF	0.383221	1.69392				BRI3	2.33648e-07	1.63841
1278										PDK4	0.0214893	2.28902	GM26682	0.383507	1.52298				RPL15	2.35856e-07	1.80832
1279										HIST1H2BJ	0.0215471	1.66128	GALNT15	0.383636	1.91734				PRKCA	2.36083e-07	1.74444
1280										RHEBL1	0.0217348	1.96351	N28178	0.383693	1.55989				CNIH3	2.50987e-07	1.90917
1281										ARHGAP20	0.021791	1.92607	6720427I07RIK	0.384674	1.82242				PIGU	2.60019e-07	1.63133
1282										ARHGAP15	0.0219853	2.33553	GM10676	0.388026	1.61181				RASIP1	2.6002e-07	2.66619
1283										SDR42E1	0.0220256	2.10428	DICER1	0.388609	1.50497				IPO5	2.60326e-07	1.67577
1284										RAD50	0.0220622	1.83736	ARHGEF11	0.390177	1.6532				PPP5C	2.60344e-07	1.66702
1285										SCAF11	0.0223931	1.56329	YES1	0.391345	1.73196				ZC3H8	2.63457e-07	2.87122
1286										HAUS5	0.0227078	1.73511	ARID2	0.393612	1.57771				TIMM44	2.70445e-07	1.60373
1287										GRIK1	0.0227406	1.64842	RNF144A	0.394489	1.81763				TUBA8	2.74923e-07	2.45143
1288										S1PR2	0.022874	1.76909	RICTOR	0.395262	1.51887				ATG5	2.76427e-07	1.57665
1289										PRRG3	0.0229408	1.98597	TRIB2	0.396147	1.64541				KARS	2.80401e-07	1.66571
1290										SAPCD1	0.0231919	1.54495	PYGL	0.396241	1.51111				OBFC1	2.87496e-07	1.6406
1291										LGMN	0.0233174	1.63386	GM20528	0.396547	1.53767				MBNL3	2.87817e-07	1.55703
1292										RP24-62C22.1	0.0234164	1.5408	GHITM	0.397225	1.51327				MTMR2	2.88583e-07	1.61713
1293										GTPBP3	0.0239955	1.84641	FRZB	0.399458	1.82355				SIGLECH	2.90859e-07	2.27026
1294										RCAN2	0.0241738	1.52539	ATXN7L3	0.400769	1.50143				FAM210B	2.909e-07	2.52969
1295										GM11520	0.0242634	1.55129	GM14443	0.401961	1.72523				RPS27A	2.95315e-07	1.70507
1296										GFPT2	0.0253446	1.82351	SUGCT	0.402012	1.69299				DGKA	2.95914e-07	1.58817
1297										REEP1	0.0254048	1.90143	PYGO1	0.40215	1.50255				RPS23	2.97333e-07	1.61001
1298										RB1CC1	0.0257926	1.82505	TMEM204	0.405447	1.54414				ANAPC4	3.00668e-07	1.54361
1299										ADAMTSL1	0.0260347	1.71306	RP23-21N15.3	0.406696	1.59311				PRMT2	3.04607e-07	1.58793
1300										FIGNL1	0.0263533	2.00772	ARAP2	0.407396	1.56411				SOCS1	3.05217e-07	2.16601
1301										COG7	0.0264237	1.72735	CACUL1	0.407487	1.64471				PAPD4	3.09232e-07	1.73122
1302										GM10644	0.0266478	1.91205	GM26543	0.407741	1.558				COPRS	3.09956e-07	1.84388
1303										RAC3	0.026779	2.12603	HSD17B12	0.408948	1.52285				NIF3L1	3.14654e-07	1.92161
1304										CALU	0.0269049	1.56853	GPKOW	0.409273	1.54394				INPP5F	3.16619e-07	1.73357
1305										WDR3	0.0269267	1.93896	RIMKLB	0.409758	1.5696				SLC39A13	3.24437e-07	1.55243
1306										GM26620	0.0270886	1.70792	GM14168	0.410222	1.52669				TCF7	3.29252e-07	2.49284
1307										ANXA6	0.0274482	1.65056	FAM107A	0.414505	1.55288				SMS	3.33855e-07	2.10701
1308										FNDC3B	0.0274916	1.94076	ATP2B1	0.415103	1.51097				RPL36	3.34791e-07	1.63713
1309										ZC3H12A	0.0275618	2.03936	MDM4	0.415589	1.5116				MTFR1	3.36369e-07	2.30757
1310										PCSK6	0.0277641	1.73171	ZFP334	0.418629	1.63739				CXADR	3.38262e-07	1.60885
1311										NFATC1	0.0282271	1.91278	NOVA2	0.420064	1.53846				AFF3	3.3851e-07	2.87518
1312										PKN1	0.0283255	1.74667	1010001B22RIK	0.420586	1.54589				1700056E22RIK	3.38988e-07	2.94056
1313										ACVR2B	0.0285486	1.88952	HBA-A2	0.420609	2.08888				BCCIP	3.42915e-07	1.63157
1314										H2-DMB1	0.0286552	1.84654	IGHA	0.420714	1.76033				HYAL1	3.47063e-07	2.43433
1315										GCC1	0.0287016	1.98613	AOX1	0.420781	1.75023				TNFAIP2	3.58176e-07	4.05947
1316										FAM109B	0.0287682	1.93362	KANSL1L	0.421966	1.50273				DLGAP5	3.61971e-07	3.04256
1317										GNGT2	0.0289746	1.90576	B230322F03RIK	0.423373	1.58345				TMEM183A	3.63412e-07	1.62495
1318										GM22951	0.0295831	1.70524	SOGA1	0.426065	1.57084				NOMO1	3.70809e-07	1.9424
1319										MINPP1	0.029905	1.72406	IGSF9	0.426398	1.55172				TSSC1	3.81026e-07	1.51047
1320										GM13251	0.0304647	2.00737	SEMA4G	0.427633	1.57846				USP5	3.8881e-07	1.57125
1321										SACS	0.0307816	2.03148	MTMR1	0.427973	1.56911				NLE1	3.91524e-07	2.3915
1322										H2-AB1	0.0313341	2.49438	ABI2	0.428964	1.53917				GM2000	3.94023e-07	1.50298
1323										TSPAN11	0.0320599	1.54372	IL1RAPL1	0.430082	1.59296				MRPL16	3.95297e-07	1.87066
1324										D130040H23RIK	0.0320972	1.85903	PBX4	0.431047	1.5403				CAPNS1	4.07947e-07	1.55023
1325										DGUOK	0.0322253	1.68396	ZFPM1	0.431682	1.66489				ATIC	4.10341e-07	1.62761
1326										PPP1R14A	0.0328744	1.57144	FYCO1	0.432063	1.50776				STAT6	4.13018e-07	2.04283
1327										ICAM1	0.033024	2.81816	PIGG	0.432891	1.77752				PPAN	4.14604e-07	1.98633
1328										MYO5A	0.0333406	1.81016	ACACB	0.435611	1.50199				PEX11G	4.29633e-07	1.89084
1329										NNMT	0.0336455	2.24106	FGF12	0.435893	1.673				CMSS1	4.30211e-07	2.13085
1330										ZFP212	0.0345361	1.72328	ELOVL7	0.439356	1.53224				EPB4.1L1	4.33534e-07	2.94172
1331										PLEKHA2	0.0345705	2.01311	PDE7A	0.440929	1.54568				RPL22L1	4.42654e-07	1.55698
1332										D930015E06RIK	0.0346785	1.64791	EPS8	0.442347	1.50851				PAGR1A	4.4398e-07	1.61869
1333										PHF13	0.0349517	2.00891	GM4924	0.442554	1.65604				1700007L15RIK	4.4407e-07	2.77455
1334										9530082P21RIK	0.0351645	1.84631	ZBED4	0.443152	1.65674				ATP13A1	4.45634e-07	1.66016
1335										RASSF7	0.0351816	2.14433	LDOC1L	0.444205	1.61967				RPL11	4.47797e-07	1.60787
1336										ARXES1	0.0355076	1.69074	GM15743	0.444484	1.50189				WDR74	4.49436e-07	1.56617
1337										PIK3IP1	0.0358647	1.63176	B230216N24RIK	0.444993	1.57931				TALDO1	4.60192e-07	1.99435
1338										LYNX1	0.0361075	2.00108	D130020L05RIK	0.446382	1.75153				RPS21	4.61938e-07	1.61401
1339										TSPAN2	0.0361545	1.98738	EHD3	0.447689	1.59937				KCMF1	4.62166e-07	1.7096
1340										9130019O22RIK	0.0363375	1.95313	NHSL1	0.447942	1.79894				CDKN2AIPNL	4.76364e-07	2.00323
1341										PIM1	0.0370859	2.01238	CYFIP2	0.450132	1.70054				EXOC6	4.91054e-07	2.93562
1342										ARHGAP6	0.0374159	2.67471	LRRK1	0.455443	1.54282				MCPH1	4.93601e-07	2.9083
1343										NUP62	0.0375915	1.87296	UNC13A	0.456808	1.67566				CRAT	5.13702e-07	1.8573
1344										HIST1H3A	0.0377014	1.65742	ACVR2A	0.459733	1.59252				PREP	5.17405e-07	2.2163
1345										SORCS2	0.0377552	1.82332	SYNGAP1	0.460927	1.57679				TBRG4	5.18385e-07	3.21631
1346										RNASEH2B	0.0377555	1.64138	RP23-402K24.2	0.468431	1.93603				PKM	5.21268e-07	1.55202
1347										BCL7A	0.0381521	1.67631	GRINA	0.470921	1.58838				LYVE1	5.2504e-07	4.43891
1348										TNK1	0.0382206	1.50863	FCGR3	0.474387	1.50721				GM17511	5.40107e-07	2.15432
1349										ZFP119B	0.0387561	1.94574	GM16287	0.474947	1.81894				C1QTNF3	5.41648e-07	2.09097
1350										RND1	0.0389336	1.51161	CSTF2	0.475032	1.53227				NR1H3	5.42782e-07	2.34347
1351										RNF165	0.0392228	1.72122	SOWAHC	0.475076	1.67173				LTBP3	5.61767e-07	1.87011
1352										PFKFB4	0.039266	1.69505	PCDHB16	0.475305	1.82609				MTHFD1	5.81338e-07	1.65493
1353										ZFP563	0.0393521	1.99488	CTTNBP2	0.47958	1.5816				GTF2H4	5.85193e-07	2.0288
1354										SMAD7	0.0393569	1.73988	OSM	0.479808	1.53803				RPL3	5.89195e-07	1.54228
1355										RNF213	0.0396017	2.17272	GATA2	0.480429	1.63455				PLEKHA3	5.99684e-07	1.89586
1356										APAF1	0.0396097	2.02896	REPS2	0.48414	1.71037				GTPBP4	6.02139e-07	1.64941
1357										ARSA	0.0397679	1.89375	ADAMTSL4	0.484745	1.55252				GRK6	6.17096e-07	1.71777
1358										PLAC9B	0.0400675	2.08426	TCF7L1	0.485036	1.53978				ANKRD13A	6.2104e-07	1.95756
1359										EIF5	0.0407612	1.52132	SULT4A1	0.488586	1.68108				ZWINT	6.36244e-07	1.54877
1360										ZKSCAN7	0.0409074	1.59324	ECHDC1	0.489464	1.533				SGPL1	6.41123e-07	1.6354
1361										SPDYA	0.0409921	1.92992	UHMK1	0.490015	1.5777				RCAN1	6.43307e-07	1.65814
1362										KCTD9	0.0410872	1.72163	HOXB5OS	0.490641	1.70741				RBM14	6.43672e-07	1.83236
1363										GM17484	0.0411238	1.83218	CACNG7	0.494872	1.77203				REXO4	6.44597e-07	1.68479
1364										GM22513	0.0422046	1.65881	2010007H06RIK	0.495118	1.56894				EGFL7	6.58729e-07	1.98236
1365										SMC4	0.042254	1.67693	ZFP654	0.497983	1.50458				TJP2	6.69795e-07	4.01603
1366										GM20633	0.0426257	1.85549	USP37	0.498592	1.55758				EEF1D	6.76238e-07	1.52257
1367										DEK	0.0427883	1.53637	GM22613	0.502685	1.53849				GM10516	6.81565e-07	4.28444
1368										SPICE1	0.0428412	1.95233	RP23-392G15.1	0.504017	1.67712				LRG1	6.82016e-07	1.6339
1369										INPP4A	0.0429796	1.84006	RP23-32A8.1	0.506996	1.71624				SIGMAR1	6.87456e-07	1.5014
1370										NCOR1	0.0444294	1.55013	NPFF	0.511313	1.50094				ARV1	6.99629e-07	3.27281
1371										NAP1L5	0.0444523	1.51495	ACVR1B	0.511663	1.65086				CDC25A	7.03976e-07	3.11427
1372										CD300LF	0.044775	1.55972	MS4A7	0.512515	1.52895				LETM1	7.05055e-07	1.59762
1373										GM12052	0.0450885	2.26403	FGD5	0.513021	1.63929				3110009E18RIK	7.30448e-07	1.91744
1374										GM12963	0.0454364	1.79863	PPP1R9B	0.514658	1.53112				TMEM43	7.38663e-07	1.73374
1375										GAL3ST4	0.0455178	1.62934	JARID2	0.515481	1.54509				CUL2	7.40599e-07	1.93443
1376										TRIB3	0.04582	1.84786	TRF	0.517631	1.54181				ABR	7.41974e-07	2.50139
1377										PLCD3	0.0459641	1.7216	2010005H15RIK	0.519981	1.58481				SYT6	7.53283e-07	4.10044
1378										WSB1	0.0464302	1.87734	GM17334	0.521954	1.53615				NUP93	7.70919e-07	2.49593
1379										ELDR	0.0467042	1.8496	BBS9	0.523359	1.58157				ZFP770	7.87632e-07	2.56332
1380										ZFP639	0.0471288	1.88968	MAP2	0.527873	1.57153				GAA	7.90411e-07	1.73678
1381										LRCH4	0.0472073	2.252	HERC2	0.529362	1.51333				DCTN2	8.09609e-07	1.63142
1382										HTT	0.0482065	1.9345	SLC35E2	0.530335	1.62706				FXR1	8.43552e-07	1.51863
1383										NOD2	0.0485234	1.57549	ZFP236	0.533114	1.50498				SLC36A1	8.50668e-07	3.07181
1384										DPP9	0.0493505	1.81986	ACAP1	0.536272	1.63597				ZDHHC18	8.73154e-07	1.6722
1385										1700109H08RIK	0.0501248	1.56821	GTF3C4	0.542011	1.50488				CHST2	8.80269e-07	3.36876
1386										PKMYT1	0.0502248	1.73651	NEFL	0.544876	1.57149				GBA	8.92992e-07	1.60071
1387										RFX2	0.0503676	1.57705	PAN2	0.546506	1.65068				NAV2	8.94894e-07	1.79864
1388										NAGA	0.0504444	1.77192	SCRG1	0.546529	1.67535				SNX8	8.98802e-07	2.13733
1389										INTS7	0.0504761	1.68945	5330439K02RIK	0.548409	1.69554				GPN1	9.07158e-07	1.66278
1390										GLE1	0.0506122	1.62872	ACRBP	0.549581	1.64097				RPL37	9.25507e-07	1.58125
1391										B3GNT1	0.0507734	1.67357	ACSS3	0.549785	1.51247				FLAD1	9.29497e-07	1.53505
1392										WASF2	0.0509304	1.52872	DRP2	0.56475	1.60696				TMEM200C	9.41712e-07	2.03964
1393										BAZ1A	0.0510353	1.80294	TGFA	0.567801	1.56211				GM16104	9.47641e-07	2.32389
1394										TNIK	0.0510776	1.59724	NOS3	0.567867	1.50383				APOL9A	9.58273e-07	2.50074
1395										RTN4RL2	0.0513461	1.56734	HNMT	0.568511	1.59959				BTF3	9.74634e-07	1.65338
1396										PEG12	0.0518709	1.60645	4833417C18RIK	0.569636	1.89261				GTF3C3	9.76872e-07	2.36637
1397										PTGR1	0.0523913	1.69435	NCOA4	0.570497	1.61211				CCL25	9.80557e-07	1.99929
1398										IFNGR1	0.0525282	1.53903	ATXN1	0.575038	1.59118				KCNK1	1.02539e-06	1.71798
1399										CERS1	0.0527023	1.74271	HUNK	0.576697	1.55011				ZCCHC4	1.03588e-06	2.33646
1400										MAMLD1	0.0527745	2.09614	CPEB3	0.578828	1.62488				CCNE1	1.09857e-06	3.857
1401										OAS1A	0.0529397	1.86983	GM10010	0.578932	1.57868				SAP30L	1.10975e-06	1.70887
1402										SMG8	0.0531074	1.93811	ACSL3	0.583127	1.57941				CHD1	1.11887e-06	1.72226
1403										LEO1	0.0531595	1.74658	2019-03-08	0.585661	1.52413				MAOA	1.16769e-06	1.72033
1404										HELZ2	0.0533364	2.23969	ASH1L	0.589131	1.60333				TSEN2	1.19138e-06	1.5009
1405										GNS	0.05371	1.56319	SOX6OS	0.590864	1.61686				OGN	1.25313e-06	1.76574
1406										TMEM53	0.0539407	1.53918	YTHDF3	0.5952	1.54779				HBEGF	1.27228e-06	2.25866
1407										CCDC50	0.0539755	1.81594	TSPYL5	0.603763	1.53015				IRGQ	1.27452e-06	2.74843
1408										STK24	0.054312	1.88102	TSPAN18	0.604275	1.55533				MTG1	1.29622e-06	1.78412
1409										ZFP324	0.054797	1.91779	SH3RF3	0.606101	1.6302				COL5A2	1.30291e-06	1.7549
1410										ZFP143	0.0548497	1.82072	NPHP4	0.616573	1.51914				ANXA5	1.3077e-06	1.74224
1411										ZFP119A	0.0549525	2.08907	SMAD5	0.621316	1.53664				RRP8	1.30784e-06	1.574
1412										CENPL	0.0550535	1.99959	LCOR	0.621553	1.56266				DUS1L	1.32712e-06	1.70484
1413										PIGV	0.0555452	1.83438	DDC	0.627273	1.59745				HADHA	1.33332e-06	1.62129
1414										NFKB1	0.0561005	1.82913	NLGN2	0.627741	1.55026				TAF5L	1.33416e-06	2.50276
1415										5430427O19RIK	0.0572824	1.79648	TRIO	0.631526	1.59439				SERHL	1.36656e-06	1.50302
1416										TBXA2R	0.0577262	1.86981	DLG1	0.632131	1.54668				MT1	1.37169e-06	1.92537
1417										ZFP52	0.0580712	2.05057	FAM179B	0.637953	1.55264				RPL26	1.37684e-06	1.6474
1418										CISH	0.058474	2.0831	LCP1	0.645037	1.52308				CHCHD5	1.39927e-06	1.71163
1419										MED13L	0.0587461	1.73278	GM25822	0.652758	1.50252				CENPN	1.40486e-06	3.44491
1420										ZRANB3	0.0589119	1.93681	GALC	0.653705	1.54674				GM9803	1.42868e-06	1.8285
1421										TXNDC12	0.0590343	1.62711	ARHGEF15	0.654101	1.9422				SNUPN	1.45284e-06	1.8245
1422										CLIP1	0.0591012	1.84548	FAM167B	0.654675	1.83426				SF3A2	1.46108e-06	1.6799
1423										SLC16A2	0.0592057	1.75399	DACH1	0.657615	1.54588				RNF7	1.47406e-06	1.78118
1424										SEH1L	0.0592696	1.68158	ABCC1	0.658045	1.5432				TTLL12	1.52575e-06	2.09432
1425										ZFP51	0.0597182	1.82153	C920021L13RIK	0.659389	1.66087				ACPP	1.52797e-06	3.01625
1426										NUFIP1	0.0601126	1.8421	RASSF2	0.659579	1.57519				WDR63	1.56186e-06	3.32303
1427										PLXNA4	0.0603177	1.78944	FBXL14	0.668629	1.56483				PGAM2	1.60357e-06	1.5271
1428										ARRDC2	0.0603428	1.89077	ULK4	0.674341	1.54045				RBM15B	1.65133e-06	2.19467
1429										CCNO	0.0611808	1.59115	SPATA33	0.680796	1.61874				DHRS13	1.67131e-06	2.7637
1430										DNAJB4	0.0619532	1.84749	TUSC5	0.682405	1.56163				NOA1	1.68317e-06	1.71416
1431										1110046J04RIK	0.0621045	1.79666	SLC26A8	0.683405	1.57185				LNP	1.69718e-06	1.77448
1432										AI838599	0.0621151	2.32286	TRP63	0.691127	1.53858				RNF139	1.71058e-06	1.91533
1433										BIRC3	0.0626344	1.9206	4933408B17RIK	0.691364	1.56045				TRIM30B	1.71609e-06	1.93834
1434										CHST12	0.0632732	1.65141	SLC47A1	0.693659	1.68675				THBS2	1.7493e-06	3.42925
1435										ZFP61	0.0637951	1.80636	CPNE4	0.69941	1.52461				RPS25	1.75679e-06	1.60454
1436										ZFP948	0.064211	1.82606	TSIX	0.699677	2.04097				NOLC1	1.76652e-06	1.62663
1437										KAT5	0.0642408	1.51198	SYPL2	0.70345	1.58606				WISP2	1.80521e-06	3.01865
1438										SFI1	0.0650197	2.06405	ATP8A1	0.705563	1.57469				SLC33A1	1.81076e-06	1.76381
1439										USP24	0.0653973	1.74192	EIF2AK3	0.712291	1.58822				NMD3	1.81381e-06	1.61396
1440										ELOVL4	0.0660247	1.72661	IGKC	0.714675	1.53445				EMILIN2	1.85473e-06	3.83981
1441										GNAL	0.0660907	1.61167	GM15972	0.716577	1.70242				RASGEF1A	1.88607e-06	2.7511
1442										ADD1	0.0674002	1.61111	SIPA1L3	0.726399	1.55357				RPS15	1.90718e-06	1.66136
1443										NEXN	0.0674642	1.83469	ALS2CL	0.733673	1.62587				FEM1A	1.92009e-06	1.80947
1444										GM16352	0.0679103	1.72053	RAI14	0.735563	1.50189				RPLP0	1.99443e-06	1.56237
1445										TSPYL3	0.0686182	1.84781	SEMA5A	0.739569	1.62362				PKNOX1	2.00003e-06	1.81061
1446										PDCD2	0.0691242	1.7209	GPR157	0.742614	1.54505				USP39	2.00293e-06	2.16955
1447										ZFP959	0.0696073	1.77552	PROM2	0.743905	1.59669				MTRF1	2.04808e-06	2.61523
1448										RNPEPL1	0.0698324	1.69416	IGF2	0.751212	1.5219				RPS4X	2.10895e-06	1.5326
1449										GADD45A	0.0699668	2.38135	METRN	0.751844	1.50365				TARS2	2.11131e-06	1.83327
1450										OLIG1	0.0701242	2.18258	MAPK8IP3	0.755955	1.57713				SH3BP2	2.13626e-06	2.49498
1451										E130102H24RIK	0.070271	1.77351	ETV3	0.756741	1.53374				RPS9	2.1384e-06	1.56551
1452										FMNL3	0.0708231	1.61869	MIR5136	0.766694	1.69047				1810011O10RIK	2.16147e-06	2.60453
1453										CMPK1	0.0708667	1.54813	ADCY10	0.767563	1.58124				SMPD1	2.19174e-06	1.54378
1454										AKAP9	0.0709756	1.72285	LONRF2	0.769013	1.6701				NEDD1	2.24289e-06	1.7938
1455										GM20939	0.0710218	1.64998	KRT28	0.775417	1.52431				SF3B3	2.27461e-06	1.58925
1456										GPATCH1	0.0714553	1.67322	NHSL2	0.777856	1.54469				CIRH1A	2.30466e-06	1.5903
1457										ACKR1	0.0718863	1.57713	COL6A3	0.778089	1.50387				HEATR5A	2.42731e-06	1.82224
1458										TRAF3IP2	0.0725339	1.87593	3110045C21RIK	0.779179	1.69192				1810009A15RIK	2.45256e-06	2.12551
1459										NSG1	0.0729514	1.51239	RDH13	0.781569	1.54007				THAP4	2.49059e-06	1.90804
1460										9330175E14RIK	0.0731622	1.64272	CACNB4	0.7817	1.70583				CFLAR	2.5105e-06	1.55818
1461										PPRC1	0.0737888	1.75514	REEP6	0.789312	1.55822				RPS16	2.51691e-06	1.54752
1462										MAP2K3	0.0740372	1.71874	ATP11B	0.789701	1.51322				DTWD1	2.52161e-06	2.85601
1463										SCN2A1	0.0742422	1.58409	NPR1	0.795361	1.61933				TMEM87B	2.56156e-06	1.77472
1464										SLC2A13	0.0751498	2.34722	PKP4	0.796676	1.53125				S100A16	2.58225e-06	1.6315
1465										DYRK2	0.075174	1.51921	2310001H17RIK	0.801129	2.37367				RPL21	2.58568e-06	1.54467
1466										PADI1	0.0753276	1.62757	FHDC1	0.801301	1.60445				PTPRM	2.66181e-06	2.33171
1467										ITGA2	0.0754167	1.69017	PNMA2	0.802928	1.77323				TDRKH	2.66762e-06	1.53322
1468										TPPP3	0.0761907	1.52407	CHST15	0.814939	1.80114				GM6133	2.6732e-06	2.43202
1469										HERC3	0.076212	1.51258	CETN2	0.824324	1.51314				ARPP21	2.7412e-06	1.54643
1470										HPS6	0.0763423	1.73935	RTEL1	0.826772	1.61376				GM14548	2.75409e-06	2.90114
1471										GM9920	0.0764699	1.80802	FIRRE	0.837613	1.5718				PANX1	2.88208e-06	1.67726
1472										ZFP874A	0.0766441	1.6737	MEX3C	0.838498	1.50121				TEX264	2.91189e-06	1.96184
1473										APOBR	0.076824	1.93546	LONRF1	0.83942	1.54765				CALM1	2.93157e-06	1.69202
1474										FNIP2	0.0769908	1.85499	CCDC149	0.843375	1.53011				GM4799	3.03578e-06	3.53475
1475										SEMA6C	0.0771339	2.04313	GM26610	0.845553	1.50048				VPS37A	3.10523e-06	1.79873
1476										ZFP773	0.077186	1.93222	TNPO2	0.847365	1.5007				PKP2	3.20571e-06	2.42401
1477										TNFRSF1A	0.0775565	1.76543	GM10126	0.852944	1.51726				TAMM41	3.28222e-06	1.90822
1478										GM26533	0.0776644	1.78373	PNPLA3	0.853358	1.52135				HSPBAP1	3.30243e-06	2.60274
1479										RSAD2	0.0777927	2.74595	SNHG9	0.858923	1.60268				B3GALT6	3.30793e-06	1.79021
1480										CACNA1H	0.0779959	1.64406	FPGT	0.859231	1.56453				PAK3	3.34275e-06	2.38466
1481										9030624G23RIK	0.0783107	1.53289	THSD1	0.872745	1.62276				PPAT	3.36479e-06	1.86217
1482										EXT2	0.0785031	1.57486	MAST4	0.886752	1.72698				DDX28	3.38329e-06	2.59725
1483										CCDC77	0.0791512	1.92222	D430041D05RIK	0.890484	1.71003				PDSS1	3.42213e-06	2.19903
1484										ROCK2	0.0795845	1.96762	XPNPEP3	0.899542	1.55742				ZFAND2A	3.43607e-06	2.0194
1485										9430065F17RIK	0.0797208	1.72927	NOTCH2	0.908905	1.66238				OTOP1	3.53499e-06	2.03461
1486										A330040F15RIK	0.0798606	1.5013	GLS	0.909175	1.54655				BAIAP2	3.62273e-06	1.84735
1487										2700062C07RIK	0.0799654	1.78683	ACKR3	0.913605	1.66512				SLC39A6	3.68736e-06	1.59041
1488										ERBB3	0.0800932	1.62489	C2CD4B	0.914462	1.61559				AP2M1	3.78394e-06	1.54575
1489										ILK	0.0803788	1.52059	UBE2V1	0.917491	1.52014				CCDC167	3.78818e-06	2.25235
1490										TGTP1	0.0804785	1.56231	PKN3	0.921416	1.54393				ASB6	3.82834e-06	1.85223
1491										ST8SIA4	0.0809753	1.52064	SYNGR1	0.926663	1.5036				RPS24	3.92571e-06	1.56959
1492										FUT10	0.0809983	1.79069	H19	0.928414	1.50219				TMED9	3.99058e-06	1.68261
1493										ZSCAN29	0.081483	1.8309	MRC1	0.930161	1.52597				DDX41	4.01311e-06	1.5354
1494										ING3	0.081689	1.75945	DENND4A	0.93381	1.58588				THNSL1	4.04374e-06	2.85943
1495										TOR3A	0.0821289	1.72359	A930005H10RIK	0.934733	1.52444				LRP2BP	4.16442e-06	1.63276
1496										MAGED2	0.0822084	1.7144	2210017G18RIK	0.948256	1.66585				PMPCB	4.17473e-06	1.54954
1497										CASP7	0.083096	1.74467	GM27031	0.953837	1.51802				AGPAT9	4.17957e-06	2.04895
1498										PTPRM	0.0834971	2.10721	COX5A	0.954339	1.5257				ATP6V0B	4.38704e-06	1.68172
1499										ERF	0.0842241	1.70566	HECA	0.957257	1.69085				DCAF10	4.42367e-06	1.68398
1500										CCDC160	0.0847676	2.09841	SMIM4	0.963721	1.51184				E030037K01RIK	4.4492e-06	2.15844
1501										SIK2	0.0848654	1.75	LRCH2	0.969721	1.61726				CALR	4.49595e-06	1.84384
1502										RAC1	0.0853855	1.55999	SEC61A1	0.977638	1.51879				FAM98A	4.53933e-06	2.27932
1503										THOC7	0.0855762	1.56467	CYP2E1	0.979396	1.57146				MCTS2	4.60107e-06	1.65238
1504										LBR	0.085973	1.85016	ACE2	0.981885	1.65594				1700037H04RIK	4.64844e-06	1.53499
1505										AI504432	0.0870407	1.55069	KMT2D	0.986928	1.55211				B3GAT3	4.67662e-06	1.56536
1506										GM12688	0.087672	1.77048							DUSP4	4.67891e-06	1.90038
1507										DGKA	0.0885997	1.65828							PSMB4	4.82211e-06	1.59407
1508										HDAC9	0.0894989	1.89756							DNAJA3	4.92804e-06	1.73618
1509										PVT1	0.0896298	1.58372							CEP76	4.94762e-06	2.99297
1510										PAFAH1B3	0.0917381	1.84789							CRCP	4.95978e-06	1.59169
1511										TRAFD1	0.0936336	1.70948							UTP23	5.01543e-06	2.22656
1512										GOLGA7B	0.0936635	1.69204							MDH2	5.03824e-06	1.6272
1513										SKI	0.0945776	1.71978							DDAH1	5.17295e-06	1.66877
1514										HK2	0.0948507	2.00399							RBKS	5.19853e-06	2.42257
1515										PDLIM4	0.0950892	1.5572							GPRC5A	5.29403e-06	1.63231
1516										CRLF1	0.0953714	1.5131							PHKG1	5.3058e-06	1.90175
1517										SH3D21	0.0955264	1.6196							POR	5.33284e-06	1.97267
1518										NTN4	0.0962347	2.12486							GPR107	5.36031e-06	1.58033
1519										RBM11	0.0967446	1.57172							NKIRAS2	5.3867e-06	1.76548
1520										MAP2K3OS	0.0967884	1.80448							D10WSU102E	5.40471e-06	1.73003
1521										GM15270	0.0968225	1.82206							WBSCR22	5.42239e-06	1.51631
1522										2610002M06RIK	0.0969818	1.8221							CLNS1A	5.43134e-06	1.69201
1523										ZSCAN20	0.0970531	1.90367							NLN	5.46112e-06	1.92739
1524										ZFP830	0.0975126	1.73353							TAF1A	5.51816e-06	1.88473
1525										RNF19B	0.098569	1.80478							EAF1	5.57828e-06	1.82788
1526										GLG1	0.0987267	1.81533							GM11974	5.73799e-06	1.89883
1527										ZMYM1	0.0989515	1.9139							CCDC51	5.90729e-06	2.24179
1528										MDM1	0.100143	1.8852							HS1BP3	5.95486e-06	1.79315
1529										GUCA1A	0.100713	1.80191							GCAT	6.02619e-06	1.69719
1530										BIK	0.101186	2.01489							TBCA	6.04055e-06	1.55059
1531										FAM118A	0.101325	1.70755							LENG1	6.21241e-06	1.74412
1532										ELMO1	0.101462	1.77185							TRIM27	6.27301e-06	1.53347
1533										PODXL2	0.101679	1.83451							ADCK4	6.36968e-06	1.60913
1534										EXOSC8	0.101718	1.63423							HSP90AB1	6.44133e-06	1.7799
1535										ITPRIPL1	0.102269	2.15538							ATP6V0A2	6.52368e-06	2.00457
1536										2310030G06RIK	0.102943	1.59345							CDC45	6.52569e-06	2.893
1537										MIF4GD	0.103113	1.6426							CNOT11	6.56103e-06	1.72973
1538										IGF2BP3	0.103404	1.84725							YDJC	6.60344e-06	2.76404
1539										CCL5	0.103444	1.79242							RTN4R	6.72317e-06	1.59725
1540										CASP2	0.104265	1.78935							GPATCH4	6.74925e-06	2.01217
1541										ETAA1	0.104633	1.73418							TLCD2	6.82601e-06	2.14142
1542										NXPE4	0.105234	1.73675							DDX49	6.90656e-06	1.63189
1543										DGKG	0.107628	1.55212							PIM3	6.94311e-06	2.07279
1544										COMMD2	0.108286	1.53517							UBA6	7.10524e-06	2.18654
1545										BATF	0.109924	1.59543							DCLK3	7.34503e-06	2.0125
1546										GM19684	0.110466	1.78586							INTS5	7.49494e-06	2.14803
1547										IL17RC	0.11064	1.63041							SHMT1	7.54069e-06	2.90422
1548										BRIP1OS	0.111046	1.73634							TOMM70A	7.54183e-06	1.97729
1549										ITPK1	0.111247	1.63425							MRPL1	7.6769e-06	1.76689
1550										TINF2	0.111415	1.71496							RPP38	7.86317e-06	1.95551
1551										AMER1	0.111761	1.84527							2210404O09RIK	7.87038e-06	2.41059
1552										PRMT6	0.112217	1.73131							PWP1	8.17892e-06	1.83611
1553										RP24-240G4.2	0.112231	1.7248							RPL23A	8.40336e-06	1.55752
1554										PECR	0.11353	1.72081							DEGS1	8.55979e-06	1.59768
1555										P2RY1	0.113572	1.69514							CDK7	8.58078e-06	1.51186
1556										LMTK3	0.1137	1.77776							MTMR9	8.9137e-06	1.78718
1557										MYBL1	0.114299	1.70305							RFC3	8.92973e-06	1.91711
1558										ENOX2	0.114526	1.97411							SLAIN2	9.04621e-06	1.89898
1559										B3GNT2	0.11458	1.89671							CACNG1	9.13415e-06	4.82598
1560										ABCA6	0.114819	1.62477							VAC14	9.28588e-06	3.43236
1561										TRPM7	0.115183	1.52255							SURF6	9.42458e-06	1.76103
1562										ARHGAP24	0.115504	1.72846							RUVBL2	9.44148e-06	1.78247
1563										DTWD1	0.115618	1.78664							GNB4	9.57407e-06	1.50089
1564										TRIM47	0.116138	1.83522							NME4	9.68615e-06	1.59844
1565										NR1H3	0.116796	1.78646							TIMD4	9.75088e-06	1.92151
1566										SLC6A6	0.117111	1.57388							TPX2	9.95864e-06	2.54139
1567										DENND6A	0.117629	2.02543							EXOC5	9.98026e-06	1.66494
1568										RAPGEFL1	0.118859	1.70733							DCLK1	1.01193e-05	1.60863
1569										TRPC1	0.119184	1.58111							SENP3	1.01993e-05	1.84324
1570										ABT1	0.119314	1.74839							COA4	1.02255e-05	2.30822
1571										SLC22A15	0.119412	1.64398							CLSTN1	1.03066e-05	1.56042
1572										4930470G03RIK	0.119584	1.60123							CLTA	1.04312e-05	1.51181
1573										SUN2	0.120265	1.64997							SNRNP35	1.04313e-05	1.94902
1574										POT1A	0.121568	1.71764							ST6GALNAC4	1.0578e-05	2.45451
1575										NDOR1	0.122142	1.72059							CACNA1D	1.05786e-05	2.29361
1576										MAP1LC3A	0.122317	1.70442							TANC2	1.09195e-05	1.54133
1577										ARHGEF17	0.123991	1.74922							TSIX	1.11039e-05	1.5164
1578										DSCR3	0.124427	1.66145							D430041D05RIK	1.16435e-05	2.05347
1579										GM10874	0.125418	1.71315							GM10603	1.20468e-05	2.40562
1580										RIPK1	0.12609	1.71916							EBF3	1.21984e-05	2.39451
1581										2019-03-03	0.126691	1.55846							TTC13	1.22867e-05	1.67666
1582										FANCF	0.126894	2.08996							IQCK	1.23834e-05	2.38041
1583										NLRC3	0.127022	1.67276							IL1F9	1.25601e-05	1.92106
1584										TNFAIP3	0.127646	1.70303							RNF19B	1.28327e-05	1.94806
1585										UBE2QL1	0.128738	1.73232							IMPDH1	1.29227e-05	2.28345
1586										TFR2	0.128889	1.62798							CCDC58	1.29871e-05	1.78393
1587										SMAD1	0.128896	1.72013							SH3YL1	1.30405e-05	2.0454
1588										GM9949	0.129321	1.65152							RPL27-PS3	1.32064e-05	1.55982
1589										CBX4	0.12944	1.67393							BC100451	1.32821e-05	3.15946
1590										ST3GAL2	0.130163	1.84666							PNPT1	1.33265e-05	1.71402
1591										1700123M08RIK	0.130545	1.71727							PIGW	1.38588e-05	3.29961
1592										LRCH1	0.131497	1.78393							TMEM120B	1.4494e-05	1.67852
1593										BC053749	0.131977	1.64923							AP5Z1	1.45391e-05	2.12196
1594										MTHFR	0.132908	1.93203							LANCL2	1.48027e-05	2.37101
1595										CDCA4	0.132917	1.69504							AUNIP	1.49222e-05	4.75838
1596										TEAD3	0.133533	1.59311							NOL8	1.50249e-05	1.95989
1597										GHR	0.133792	1.7808							MAP4K3	1.56437e-05	1.91231
1598										MKX	0.133866	1.71137							NOX4	1.59452e-05	3.05387
1599										TRMT12	0.135938	1.90567							HEATR2	1.64615e-05	2.16045
1600										ZFP367	0.13632	1.92226							NOL9	1.65061e-05	2.38332
1601										RELA	0.136364	1.69241							TSSK6	1.66468e-05	2.49502
1602										GM26582	0.136885	1.8428							MMGT1	1.66519e-05	1.85013
1603										LIMD1	0.136936	1.52633							TIMELESS	1.69825e-05	2.29857
1604										SIVA1	0.137098	1.62299							GINS2	1.70436e-05	3.26525
1605										LYL1	0.137752	1.52326							PSMF1	1.76125e-05	1.51605
1606										ROBO4	0.137992	1.6103							RTCA	1.7934e-05	1.50352
1607										GPR153	0.138861	1.86783							PACRGL	1.81312e-05	1.76371
1608										NUP155	0.139716	1.83009							CKS2	1.81977e-05	2.00567
1609										KANK2	0.140469	1.76748							KLHL2	1.84487e-05	2.35054
1610										PARP12	0.140853	1.72633							PTPN23	1.84664e-05	1.76005
1611										GM21092	0.142468	1.51777							CCNYL1	1.86368e-05	2.16163
1612										RFC4	0.142855	1.70881							RPL34	1.88473e-05	1.51788
1613										RNU12	0.144048	1.83763							ATF6	1.94829e-05	2.01853
1614										RASSF8	0.144335	1.73779							CABP1	1.9988e-05	2.60786
1615										NXPE3	0.145254	1.60432							KAT2A	2.00993e-05	1.58777
1616										DFFB	0.14548	1.65207							JADE3	2.01959e-05	2.06289
1617										MAML3	0.145629	1.69168							GGA1	2.14978e-05	1.52384
1618										TNC	0.146069	1.83247							ECT2	2.18455e-05	2.87417
1619										4921524J17RIK	0.147415	1.62654							LILRA6	2.24708e-05	1.90578
1620										POLA2	0.147491	1.71772							HAUS3	2.28704e-05	2.04651
1621										LIG1	0.147751	1.77991							FAM72A	2.34402e-05	4.3715
1622										TSSK4	0.148001	1.57431							PAPSS2	2.37683e-05	3.15399
1623										BEST1	0.149152	1.97005							KPNA1	2.39801e-05	1.62019
1624										ASF1B	0.150653	1.6707							UBE2S	2.41262e-05	1.50173
1625										DENND2C	0.150922	1.58757							PPHLN1	2.46742e-05	1.7537
1626										GM26621	0.151059	1.52649							1700001G11RIK	2.54101e-05	2.052
1627										ZBTB44	0.152179	2.02671							FLYWCH1	2.54124e-05	1.58408
1628										GINS3	0.155377	1.61798							WNT10A	2.54298e-05	3.14118
1629										ITGA5	0.156887	2.11132							ATG4C	2.54737e-05	2.18691
1630										CBR3	0.157814	1.7097							MRGPRE	2.64552e-05	1.77974
1631										ARHGEF2	0.157975	2.00632							SMC2	2.65575e-05	1.70316
1632										SNHG1	0.15901	1.50117							NPLOC4	2.65981e-05	1.79283
1633										MVP	0.15927	1.65021							OCEL1	2.66188e-05	1.7711
1634										OAF	0.15947	1.59904							TUBA1B	2.66233e-05	1.52124
1635										ZFP949	0.160419	1.78489							HPS6	2.69761e-05	1.97381
1636										TRABD2B	0.16092	1.56871							TCTE3	2.71036e-05	2.20567
1637										TBC1D7	0.161024	1.76193							ASAH1	2.71145e-05	1.51703
1638										CDK17	0.161214	1.74039							ZFP239	2.76218e-05	2.22956
1639										GMIP	0.161936	2.20725							ARHGEF7	2.79952e-05	1.54196
1640										IRAK3	0.162277	2.06854							PRRG2	2.80027e-05	1.77024
1641										TFPI	0.162376	2.78617							CABLES2	2.82358e-05	2.8875
1642										ZC3H7A	0.16267	1.53096							CD82	2.82509e-05	1.71531
1643										HIST1H4C	0.163672	1.6019							EIF4E3	2.84144e-05	1.6405
1644										KIZ	0.163939	1.69186							RPL30	2.91209e-05	1.56365
1645										GPC3	0.164158	1.84272							NOP14	2.91514e-05	1.79064
1646										ZFP64	0.164632	1.61703							DPY19L3	2.94515e-05	1.98778
1647										DGCR14	0.165129	1.62337							RNF113A1	2.95112e-05	1.73661
1648										SULF2	0.165404	1.65554							DOT1L	2.95689e-05	1.78589
1649										IL13RA1	0.165439	1.71109							HPS4	2.95814e-05	1.91793
1650										MLXIP	0.166185	1.82148							DTX2	2.95817e-05	1.50736
1651										IL1B	0.166992	1.50768							E430025E21RIK	2.98527e-05	1.86817
1652										CNN1	0.167149	1.56983							CDC7	2.99263e-05	2.94342
1653										TCOF1	0.16726	1.69943							1700037C18RIK	3.1486e-05	1.93212
1654										ZYX	0.168405	1.64197							ICAM4	3.15484e-05	2.58817
1655										ADCK2	0.16848	1.64664							FASTKD2	3.16861e-05	2.06907
1656										EPSTI1	0.168591	1.64202							LSM12	3.23443e-05	1.63979
1657										POSTN	0.169251	1.58597							DSCC1	3.26363e-05	2.15347
1658										PWWP2B	0.169254	1.6721							CTSB	3.55276e-05	2.07109
1659										TRPM4	0.169298	1.87841							ANAPC7	3.61031e-05	1.6879
1660										APPL1	0.169453	1.69104							C130036L24RIK	3.64005e-05	2.66011
1661										CGGBP1	0.170088	1.52295							CCDC109B	3.65276e-05	2.27427
1662										UEVLD	0.170338	1.77249							ALKBH6	3.6738e-05	1.60066
1663										2510009E07RIK	0.170719	1.50265							SCX	3.71872e-05	2.59694
1664										JAK1	0.171375	1.53767							SNAP29	3.75463e-05	1.56739
1665										CP	0.17141	1.75321							ORMDL1	3.79109e-05	1.64171
1666										KIF18A	0.171572	1.69023							A530095I07RIK	3.97323e-05	1.70026
1667										GM23864	0.172209	1.76538							FSTL3	4.0913e-05	1.87578
1668										GM16174	0.173486	1.53578							MRPL10	4.13701e-05	1.56454
1669										COL9A3	0.175716	1.6478							NADK2	4.388e-05	1.68681
1670										ANKRD27	0.177886	1.85278							IL11	4.3969e-05	2.3267
1671										LMO4	0.178075	1.63534							SLC5A6	4.47799e-05	2.12725
1672										MTMR14	0.178766	1.72888							LRRK2	4.49196e-05	2.44847
1673										CLDN12	0.17914	1.97162							MRI1	4.50765e-05	1.52593
1674										OS9	0.180829	1.61833							4930513N10RIK	4.76393e-05	1.89775
1675										PML	0.181311	1.68216							ERLIN2	4.77745e-05	1.75543
1676										ITPKC	0.181894	1.79369							HSP90B1	4.83637e-05	1.62475
1677										PON3	0.182562	1.50061							ATP6V1G1	5.28163e-05	1.50295
1678										GM4117	0.182666	1.55915							ELAC2	5.31339e-05	1.73618
1679										MAGI1	0.182972	1.53229							C230052I12RIK	5.33106e-05	2.47081
1680										ZFP354A	0.183982	1.81891							STAMBPL1	5.3337e-05	1.94035
1681										RP23-464D14.3	0.184718	1.5199							HILPDA	5.4112e-05	1.64076
1682										CLP1	0.185245	1.63734							PHLDB3	5.43507e-05	2.08188
1683										ZFP53	0.18527	1.93716							CKLF	5.44332e-05	1.96096
1684										PTGS2	0.185358	1.78752							RALGAPB	5.59566e-05	1.67686
1685										HOXC10	0.185424	1.55538							LYRM7	5.63896e-05	2.6973
1686										PROSER2	0.185642	1.84943							SMARCAL1	5.68546e-05	2.32912
1687										4930481A15RIK	0.186372	1.64852							TFB1M	5.71177e-05	2.10024
1688										SYNE3	0.186639	1.81053							PLCB1	5.88487e-05	2.22254
1689										CDKN2D	0.186894	1.80932							TBCE	5.89373e-05	1.6556
1690										B3GLCT	0.187063	1.77358							PDIA5	5.91454e-05	3.43632
1691										ASCC3	0.187263	1.7176							IRG1	5.94057e-05	3.73363
1692										SAMHD1	0.188114	1.95798							AI115009	5.95842e-05	1.63318
1693										ZFP943	0.18988	1.8038							3110002H16RIK	5.97024e-05	1.7778
1694										ISG15	0.189954	1.91803							SLC15A4	6.11201e-05	1.67203
1695										E030042O20RIK	0.191035	1.58807							ASCC2	6.24128e-05	1.58405
1696										FGF1	0.191241	1.6757							CD79A	6.24465e-05	2.7497
1697										ZFP429	0.192261	1.52793							ATRN	6.35923e-05	1.50877
1698										RP2H	0.192992	1.63231							SLAMF8	6.47702e-05	1.83715
1699										UHRF2	0.193202	1.63888							RNF149	6.48833e-05	1.68971
1700										ZFP874B	0.193303	1.97752							S1PR2	6.52301e-05	1.59572
1701										LRRTM3	0.193628	1.52682							MICAL2	6.56619e-05	1.88872
1702										4930579G24RIK	0.194449	1.84067							PRPF3	6.90194e-05	2.16433
1703										YDJC	0.194492	1.57874							BRICD5	6.95154e-05	2.02189
1704										ZBTB34	0.19596	2.10637							HTRA3	7.27087e-05	1.50061
1705										FOXN3	0.196984	1.68353							CLUH	7.34842e-05	2.08145
1706										ZXDC	0.197108	1.87162							RCOR2	7.39751e-05	2.31486
1707										AATF	0.197294	1.67658							PPP1R7	7.53674e-05	1.54177
1708										GPR108	0.197838	1.52324							MRPS2	7.58378e-05	1.79865
1709										ECM1	0.198744	1.68277							SIRPB1C	7.6675e-05	2.17873
1710										LDLRAD3	0.200331	1.58166							ADSSL1	7.67449e-05	1.59873
1711										TMEM263	0.201505	1.52129							ZAP70	7.80114e-05	2.39731
1712										ZFP472	0.20233	1.63758							NEK2	7.95769e-05	4.59752
1713										TDP1	0.203437	1.57949							2510039O18RIK	8.13068e-05	1.55758
1714										VOPP1	0.204747	1.8279							GNPAT	8.36923e-05	1.66694
1715										CDC42SE2	0.205069	1.51274							BCAR1	8.41099e-05	1.57836
1716										4430402I18RIK	0.205193	1.60812							SPATA5	8.44955e-05	2.34216
1717										CDK20	0.205737	1.73124							G6PDX	8.51335e-05	1.90165
1718										PVR	0.206049	1.61814							STFA2L1	8.81396e-05	4.8853
1719										ZFP300	0.206306	1.51929							GLT28D2	8.93426e-05	2.20377
1720										TUBD1	0.206905	1.75088							TNFSF13OS	8.97222e-05	3.39019
1721										MYO18A	0.207874	1.59496							SPHKAP	9.32951e-05	3.81361
1722										FPGS	0.208504	1.57267							PRPF6	9.57391e-05	1.56252
1723										SYT6	0.209012	1.50514							UTP6	9.66012e-05	1.53458
1724										OSER1	0.209227	1.66036							SUGP2	9.70711e-05	1.94817
1725										TCF19	0.20938	1.6436							MRE11A	9.75775e-05	1.5147
1726										STIM1	0.210474	1.76296							4930515G01RIK	9.80328e-05	2.99997
1727										1700021K19RIK	0.210935	1.67449							TEX30	9.90425e-05	1.55694
1728										INSR	0.211006	2.05938							GOSR1	9.96858e-05	1.65441
1729										SBSN	0.213093	1.99034							GPHA2	0.00010149	1.52288
1730										VSIG10L	0.213894	1.61515							TIMM8A1	0.000101655	1.86031
1731										LOXL3	0.215195	1.7335							RPL7A-PS3	0.000102316	1.52696
1732										TLR2	0.216269	1.84378							CCDC142	0.000103687	2.37604
1733										CERCAM	0.217529	1.66618							1110008L16RIK	0.000104727	1.88335
1734										OASL1	0.217567	1.7643							CUL4B	0.000107148	1.7212
1735										PLIN2	0.217829	1.65127							2810417H13RIK	0.000107899	5.35638
1736										CPD	0.217964	1.88241							DPP9	0.000109913	2.03095
1737										PSME1	0.218028	1.59898							BTG3	0.000111085	2.15804
1738										RAB29	0.218296	1.71461							KLHDC4	0.00011134	1.70656
1739										MAP4K5	0.21869	1.7091							TRIM16	0.000111478	2.11498
1740										METTL13	0.218863	1.71873							CDR2	0.00011427	2.90087
1741										STAT6	0.219025	1.7936							NOL6	0.000116693	1.5261
1742										OLFM1	0.219642	1.58325							TBC1D1	0.000118214	3.44538
1743										PALLD	0.220019	1.71722							LRTM2	0.000118885	2.28289
1744										FBXO32	0.221737	1.6677							SLC8B1	0.00011954	1.61875
1745										PLAUR	0.222197	1.87914							UBTD1	0.000119595	2.00542
1746										PEG3	0.222722	1.81731							ABL2	0.000120435	1.72223
1747										CSF1	0.222903	1.7							ZFP639	0.000126241	1.5602
1748										LRP12	0.223146	1.89248							TYMS	0.000131017	1.65786
1749										CTC1	0.223539	1.84966							GM17484	0.000132089	4.34614
1750										ZFP775	0.22356	1.73186							GM26951	0.000132348	1.94761
1751										GM26722	0.223957	1.5282							DPH2	0.000136698	2.02005
1752										CBX8	0.224766	1.60617							CAR5A	0.000137778	1.965
1753										WDR91	0.224937	1.6462							INIP	0.000140064	1.72757
1754										PCGF5	0.225594	1.69823							WDR70	0.000142124	1.57356
1755										MYD88	0.226316	1.86432							PIR	0.000143553	2.16572
1756										CLEC4N	0.227005	1.56547							MAPKAPK2	0.000144837	1.54624
1757										PLOD2	0.227434	1.75094							WHSC1	0.00014669	1.63017
1758										CCDC71	0.22797	1.70031							SNHG1	0.000151998	1.5834
1759										TSPYL4	0.22853	1.55091							ALG8	0.000156926	1.7923
1760										MTA3	0.230085	1.87654							ZFP185	0.000159192	2.93199
1761										INTS12	0.230374	1.83047							SLC30A7	0.000160041	1.71944
1762										GALNT4	0.23114	1.83706							SCRN3	0.000160097	1.50651
1763										BMF	0.231618	1.72816							ZFP64	0.000161557	1.65525
1764										ZFP873	0.232516	1.57638							MEMO1	0.000166152	1.62078
1765										FBXO6	0.233279	1.65659							CXCL3	0.000166686	1.83514
1766										B230319C09RIK	0.234968	1.56202							STAM	0.000168759	1.53332
1767										RASSF5	0.235256	1.54696							TBC1D22A	0.000176215	1.81019
1768										BB218582	0.235676	1.52666							SEC23A	0.000177924	1.50917
1769										THOC3	0.237014	1.52054							RP24-159O13.1	0.000184337	1.82579
1770										ZFP747	0.237483	1.59943							1700112J16RIK	0.000184559	2.73394
1771										MUM1L1	0.2382	1.63475							INADL	0.000189555	2.31442
1772										ME3	0.238279	1.80502							RMI2	0.000191503	3.24004
1773										ITGA3	0.238477	1.86931							8030462N17RIK	0.000192764	2.07503
1774										0610038B21RIK	0.23857	1.50896							ASPN	0.000198614	2.34588
1775										HSPBAP1	0.238848	1.56295							SGIP1	0.000198976	3.37769
1776										CNTF	0.239115	1.91595							PDCD11	0.000200377	1.5637
1777										PTBP3	0.239549	1.63261							NIPAL1	0.000202463	2.15465
1778										HARBI1	0.240141	1.60649							GPALPP1	0.000202532	1.90417
1779										PILRA	0.241317	1.68705							RPA2	0.000204947	1.84544
1780										9130230N09RIK	0.241416	1.58216							TFB2M	0.000205827	1.69546
1781										DUSP5	0.242481	1.8646							PLA2G6	0.000207303	1.55051
1782										NOL9	0.242801	1.62052							GM10709	0.000207855	3.17714
1783										ATF5	0.243328	1.59316							XRCC3	0.000210375	3.75271
1784										PPP4R1	0.243569	1.51963							NUP54	0.000212373	1.85538
1785										SNORA68	0.243919	1.50092							DPF1	0.000212658	5.12488
1786										GM7120	0.245045	1.50839							ARFGEF2	0.00021301	2.56437
1787										USP38	0.245652	1.50299							DYM	0.000217907	1.69021
1788										PDDC1	0.246736	1.56873							D6WSU163E	0.000225945	2.47809
1789										AVEN	0.247481	1.5632							INPP5A	0.000231379	1.82599
1790										MYO1D	0.248457	1.7743							PEMT	0.000233043	2.19824
1791										MOGS	0.24876	1.65228							GM16192	0.000236882	2.73497
1792										AA415398	0.249167	1.97259							GM21887	0.00024504	1.98755
1793										MOCS3	0.249498	1.81049							SECISBP2	0.000245854	1.51312
1794										DNAJB5	0.250003	1.73817							SYT2	0.000250453	1.51958
1795										FAM222A	0.250173	1.63286							LXN	0.000251369	1.8693
1796										PIEZO1	0.250194	2.23554							GYK	0.00025362	1.64413
1797										FZD7	0.250345	2.16897							TSR2	0.000263702	1.57048
1798										ANTXR1	0.250702	1.73985							OSGIN1	0.000264955	1.5986
1799										STX1B	0.250981	1.70876							ZFP598	0.000265567	1.77228
1800										METTL4	0.251226	1.74967							LDHD	0.000267035	1.75983
1801										TRPC4AP	0.252114	1.65914							RFC4	0.000282662	1.87249
1802										PDE4B	0.259372	2.01072							AP3D1	0.000290693	1.50437
1803										ZFP738	0.259685	2.08711							KRI1	0.000291674	2.32598
1804										PRICKLE1	0.261034	1.76961							B3GALNT2	0.000297333	1.6977
1805										LRRC75A	0.26108	1.50666							DYNLT1B	0.000301045	1.89214
1806										TMEM91	0.261291	1.61006							SCFD2	0.000308758	1.87633
1807										2900011O08RIK	0.262209	1.79799							FAM171A2	0.000313843	1.51167
1808										RBM15	0.26233	2.10427							CACNB4	0.000315385	2.40057
1809										FBXO30	0.262452	1.88578							SLC36A3OS	0.000315412	1.52155
1810										TBC1D2B	0.2625	1.92848							JSRP1	0.000315893	8.62065
1811										DOK6	0.263161	1.59059							NOL3	0.000318412	1.52056
1812										DBR1	0.263205	1.76794							EXOSC3	0.000319491	1.5896
1813										GPC4	0.263645	1.604							GM4070	0.000320251	2.48207
1814										TRMT5	0.263927	1.69286							GM26610	0.000322888	2.29684
1815										ANXA4	0.265136	1.67687							CACNA2D2	0.000326167	2.3931
1816										SSPN	0.266053	1.69372							SH2B1	0.000327736	1.57135
1817										ZFP954	0.2662	1.82841							SPATS1	0.000328622	3.29248
1818										DDX31	0.267317	1.77812							A230028O05RIK	0.00032969	1.75257
1819										RETNLG	0.268989	1.69057							1600012H06RIK	0.000331039	1.541
1820										2610002J02RIK	0.26911	1.54326							MTA3	0.000342994	1.70381
1821										MEOX1	0.269139	1.51267							COL8A2	0.000350083	1.54619
1822										NCAPH2	0.269778	1.53442							RPUSD4	0.00035011	1.76429
1823										TBP	0.270601	1.69265							CDCA3	0.000360776	2.22024
1824										RP23-402K24.6	0.270894	1.50455							PGBD1	0.000361956	1.69447
1825										ZFP667	0.27149	1.75598							USP31	0.000362016	3.21751
1826										5830428H23RIK	0.273141	1.50538							FABP5	0.00037891	1.65448
1827										TSC22D2	0.274287	1.55062							GM14002	0.000384582	1.53246
1828										ERLIN1	0.274411	1.87108							ARID5A	0.000389867	1.86494
1829										IKZF5	0.274443	1.56681							PRRG4	0.000404301	1.58969
1830										NRBF2	0.275525	1.58727							TBC1D22B	0.000422855	3.57133
1831										ZFP960	0.27755	1.68928							ZDHHC21	0.000431797	1.74568
1832										ZBTB42	0.280041	1.59934							RASL2-9	0.000431974	3.1636
1833										IMPDH1	0.28088	1.62204							RAI1	0.000436924	1.62999
1834										HIST4H4	0.281204	1.70362							TRAM2	0.000439339	1.68844
1835										ZC3H6	0.281913	1.64858							OMA1	0.000443292	1.59449
1836										CBX2	0.282997	1.54069							GPR150	0.00044339	1.57595
1837										ZFP764	0.283038	1.58293							LY6G6D	0.00044655	2.30272
1838										GM10369	0.284082	1.6214							TMEM69	0.000446754	2.01819
1839										CRTC2	0.284722	1.57919							PQLC2	0.000453503	1.84798
1840										SERGEF	0.285509	1.61038							FBXO28	0.000469301	1.57478
1841										SUPT7L	0.286606	1.76877							IL12RB1	0.000481485	1.52094
1842										ARCN1	0.287238	1.54432							RFC5	0.000492789	1.97435
1843										CCL12	0.287754	1.61677							ZBTB17	0.000499252	2.14164
1844										NHS	0.287876	1.9338							SCO1	0.000501066	2.10279
1845										NYAP1	0.290338	1.59664							4930503L19RIK	0.000502751	1.93066
1846										PTPRF	0.290467	1.67125							WDR59	0.000502948	2.01639
1847										ZFP85	0.29203	1.62072							SMUG1	0.000503762	1.75135
1848										SNX10	0.292266	1.52454							C78339	0.000515129	1.6177
1849										FEM1C	0.292282	1.58724							GHR	0.000522529	1.63026
1850										ZFP282	0.292687	1.68827							PIWIL4	0.000522978	2.84963
1851										GDF9	0.294095	1.66675							AMOTL1	0.000524558	1.61037
1852										E430018J23RIK	0.294547	1.6716							CDK2	0.000528596	2.00315
1853										3110007F17RIK	0.29456	1.75504							CIPC	0.000538544	1.50796
1854										ZFP72	0.294599	1.65159							METTL4	0.000539315	2.78412
1855										ATF7IP	0.294931	1.50473							ANO6	0.000540188	1.64754
1856										DUSP1	0.295568	2.25548							PCGF6	0.000551015	1.61314
1857										THAP4	0.296495	1.66975							ZMYND19	0.000563701	1.99205
1858										FOXM1	0.296811	1.65743							NARS2	0.000577028	2.0158
1859										TAF1C	0.298295	1.86569							CMYA5	0.000590812	1.70167
1860										ADAT2	0.298603	1.77072							MAPK6	0.000600117	1.89657
1861										LSM10	0.298855	1.5059							PIGF	0.000607841	1.53151
1862										GM27253	0.300267	1.50714							MASTL	0.000612454	1.79569
1863										DENND3	0.300597	1.60272							OAS3	0.000615441	2.22439
1864										M6PR	0.300723	1.53505							GM14295	0.000616944	1.64126
1865										FRMD6	0.302273	1.56129							OLFR212	0.000617144	2.27263
1866										RCOR2	0.302302	1.5393							GM9396	0.000623664	1.90258
1867										CLCC1	0.303639	1.50137							1110002L01RIK	0.000625023	1.93722
1868										ISPD	0.303962	1.69891							PWP2	0.000635086	2.5565
1869										CCL8	0.304484	1.57919							ALG9	0.000636425	1.66164
1870										TTC7	0.305036	1.58971							HINFP	0.000637133	1.71185
1871										FAM134C	0.306639	1.65278							ZFP429	0.000647684	2.04182
1872										NEK1	0.307795	1.54475							GM15675	0.000654342	2.40671
1873										5430435G22RIK	0.30835	1.50968							PROSCOS	0.000656007	1.56061
1874										TCEANC	0.30984	1.91267							CD68	0.000662241	2.70019
1875										RAB42	0.311011	1.66397							MAPKAPK3	0.000667203	1.51341
1876										INPP5A	0.311397	1.75526							CYB561D1	0.000667524	1.95394
1877										TRP53I13	0.311561	1.60994							KLC2	0.000667771	1.95132
1878										TMEM189	0.311575	1.71152							AURKA	0.000672229	2.26039
1879										DAPK1	0.312094	1.62812							MMP2	0.000690459	2.18119
1880										BEND4	0.312231	1.6833							SNX11	0.000694992	1.55747
1881										LIMS1	0.313903	1.66439							PLEKHO2	0.000699968	1.81504
1882										LIPO1	0.31409	1.67434							CPSF4	0.000724163	1.57795
1883										RBFOX2	0.314442	1.70701							MCM5	0.000732268	2.86427
1884										REL	0.314455	1.76934							CLDN12	0.000748023	1.77711
1885										ZFP956	0.315788	1.5433							GABARAP	0.00075108	1.54954
1886										VPS13C	0.318946	1.72283							CDCA7	0.00075784	2.21132
1887										ZFP719	0.319069	1.53435							E2F3	0.000767394	1.65352
1888										TMEM141	0.319872	1.52985							TUBD1	0.000789892	1.8933
1889										PIP4K2A	0.320065	1.76192							GM5483	0.000792513	4.74889
1890										SNX21	0.320083	1.72497							RQCD1	0.000792941	1.63986
1891										RCOR3	0.320814	1.54335							POLRMT	0.000794328	1.53513
1892										LYST	0.321541	1.70337							INTS3	0.000806479	2.63821
1893										CMIP	0.321588	1.767							2210008F06RIK	0.000845082	1.9892
1894										PMS2	0.32177	1.6567							C330011M18RIK	0.000855565	1.54183
1895										POC1B	0.322411	1.65267							ZW10	0.000857035	2.07002
1896										AGO4	0.322554	1.79044							PCGF1	0.000873989	1.81174
1897										TIGD3	0.322717	1.51149							ANKRD49	0.000877261	1.78357
1898										TULP2	0.322925	1.75158							C1GALT1	0.000883888	1.66808
1899										CGNL1	0.324089	1.67901							NUDT1	0.000886432	1.75864
1900										PTTG1	0.325245	1.57662							PRKCDBP	0.000889014	1.83749
1901										CHIC2	0.327276	1.66262							GM26205	0.0009151	2.06719
1902										CEP95	0.327351	1.65015							NFATC2IP	0.000917047	2.7651
1903										SLC19A2	0.327609	1.71471							GM15706	0.000942662	1.69623
1904										SEMA4C	0.327713	1.50061							LARGE	0.00094484	1.54429
1905										RNF113A1	0.328576	1.62187							FHL3	0.000956856	2.65863
1906										NUBP1	0.329047	1.6093							SLCO4A1	0.000961843	1.80457
1907										RAPGEF4	0.329177	1.62555							D630003M21RIK	0.000975305	2.88094
1908										PRKD2	0.329369	1.68662							MMS22L	0.000976218	3.54261
1909										MCL1	0.329565	1.75449							FAM43A	0.000977931	2.81207
1910										GM10561	0.330396	1.56272							ZFP566	0.000982596	2.09535
1911										LRRC28	0.33183	1.60828							PIGA	0.00101431	1.54395
1912										MAP3K3	0.332093	1.6676							TBC1D5	0.00102711	1.959
1913										TGFBR2	0.332518	1.86488							MOGS	0.00102833	2.03962
1914										MUM1	0.333634	1.51422							SLC25A37	0.00103878	1.95531
1915										PRKAA1	0.334254	1.52836							PTGER4	0.00103956	3.17563
1916										LNPEP	0.334998	1.72238							GM2885	0.00104815	2.26564
1917										IGF1R	0.339392	1.83305							TFDP1	0.00105016	2.77685
1918										AFAP1L2	0.339611	1.52408							AARS2	0.00105114	1.50511
1919										EMB	0.34113	1.54526							RADIL	0.00105167	1.8228
1920										GIT2	0.341397	1.5083							ZFP930	0.00105744	2.0011
1921										TNFRSF1B	0.341952	1.72822							RBP4	0.00107037	1.81667
1922										ZBTB25	0.342028	1.56301							FAM203A	0.00108131	1.89679
1923										SLC25A28	0.342632	1.57165							ATP6V0C	0.00110075	1.56577
1924										ANKRD39	0.343545	1.61079							PPRC1	0.00111095	2.36676
1925										ARL4C	0.344118	1.84753							GM12927	0.0011257	2.98103
1926										HEBP1	0.344139	1.88689							SLC9A9	0.00113604	1.51595
1927										SNORA31	0.344877	1.51833							OIP5	0.00114179	4.25078
1928										NUP43	0.344982	1.63505							ARL6IP5	0.00114297	1.50711
1929										FOXC1	0.346637	1.5116							GPN2	0.00115293	1.50918
1930										P2RX5	0.346674	1.8409							FICD	0.00115482	1.68765
1931										STAT1	0.346843	1.54593							ANGPTL4	0.00117396	2.61566
1932										FILIP1L	0.347789	1.73166							GM12592	0.00118828	2.34506
1933										RALGAPA2	0.348448	1.85507							1810034E14RIK	0.00121128	1.55282
1934										HACE1	0.350939	1.70055							XXYLT1	0.00122107	2.05828
1935										SERF1	0.351058	1.50948							MTRR	0.00122605	1.86994
1936										CCPG1	0.352569	1.59718							UBQLN4	0.00124371	1.61886
1937										TMEM8B	0.352745	1.75554							RNASEH1	0.00124776	1.73947
1938										ADCK3	0.353046	1.5948							SFT2D3	0.00124903	1.68918
1939										MAD2L2	0.35442	1.637							TMEM62	0.00125423	1.58862
1940										KLHL29	0.3553	1.56083							ALG13	0.0012599	1.88115
1941										PSD3	0.355765	1.72761							TMA16	0.00127412	1.72822
1942										GTF2IRD1	0.356329	1.78912							GM17518	0.0013281	1.78778
1943										GPATCH8	0.356892	1.51132							GRHL1	0.00133694	2.4597
1944										DNTTIP2	0.35781	1.64196							VPS39	0.00135941	1.9318
1945										FKBP11	0.359232	1.8407							KMT2D	0.00136319	1.59597
1946										PHYKPL	0.359483	1.72426							NPRL3	0.00140472	1.62386
1947										APBA1	0.360185	1.64337							SPSB1	0.00142845	1.57481
1948										CORO1C	0.360909	1.6851							5430416O09RIK	0.00143387	1.55877
1949										GM13111	0.361075	1.54063							HOPX	0.00145436	1.81703
1950										PANX1	0.361428	1.55768							ADAMTS14	0.00150472	1.70338
1951										USP25	0.361775	1.51902							RAD51AP1	0.00154527	2.02954
1952										RHOD	0.362262	1.51998							5830415F09RIK	0.00155523	1.69069
1953										CHRAC1	0.362588	1.52929							UHRF1	0.00156665	2.88268
1954										4632427E13RIK	0.363226	1.58761							SERPINE1	0.00157941	4.76073
1955										NXF2	0.363473	1.50477							ZBED4	0.0017021	2.59862
1956										TMEM63A	0.365969	1.57773							FIGNL1	0.00170852	2.05563
1957										TMEM159	0.366013	1.55173							NUP205	0.00172386	1.57782
1958										PARVAOS	0.36661	1.63259							GM16537	0.00177496	2.56602
1959										ELK3	0.367148	2.26674							C330018D20RIK	0.001792	1.52767
1960										KLF3	0.368486	1.82342							MCM3	0.00179263	1.71229
1961										MAP3K6	0.36864	1.57565							VASH2	0.00182715	1.63901
1962										GM10544	0.370903	1.56688							NOC3L	0.00184744	2.38344
1963										BLZF1	0.371531	1.5168							MYC	0.00186134	1.55039
1964										CCDC18	0.371748	1.60433							MCM10	0.0018778	1.55137
1965										TNRC6C	0.373174	1.52515							AAK1	0.00189038	2.275
1966										2700016F22RIK	0.374382	1.64325							C230062I16RIK	0.00190247	3.1934
1967										NAGPA	0.375412	1.55195							IFRD1	0.00193518	1.61651
1968										GNAQ	0.376153	1.65747							ARMC3	0.00199025	1.78912
1969										TRUB2	0.377191	1.50515							MIPOL1	0.00203606	1.7596
1970										ESCO1	0.377912	1.52851							DNAJC21	0.00204773	1.60421
1971										D8ERTD82E	0.378842	1.65614							GM13470	0.00206987	2.29312
1972										FBN1	0.380141	1.67224							TNNT3	0.00207883	1.89659
1973										KIF20B	0.381024	1.56861							SLC41A3	0.00208041	1.97178
1974										CYP4V3	0.381961	1.50078							WIPF3	0.00210591	1.53774
1975										NEDD1	0.382526	1.7267							NFKBIE	0.00210883	2.0002
1976										G2E3	0.384403	1.54247							KNSTRN	0.0021288	1.97965
1977										GM12840	0.384408	2.27606							RNF217	0.00215064	1.57202
1978										ERI1	0.386124	1.68098							COPS7B	0.00216426	1.6897
1979										AI837181	0.387358	1.60265							PLAGL1	0.00217442	2.44887
1980										UPRT	0.387511	1.60786							GM17541	0.00217786	2.75004
1981										ING5	0.388547	1.59865							FLNC	0.00217927	1.77121
1982										CTDSP2	0.389137	1.63156							PTGR1	0.00224654	2.14418
1983										THNSL1	0.389527	1.57283							ZMYM3	0.00225141	1.50101
1984										ZDHHC9	0.391418	1.63184							SUSD2	0.00225371	1.5496
1985										PET112	0.393711	1.66383							MSRA	0.00229336	1.6729
1986										GM4262	0.39679	1.57382							PIK3R4	0.00230925	1.52666
1987										CD99	0.397464	1.66695							A730017L22RIK	0.0023252	1.69216
1988										NT5DC3	0.398824	1.58134							GNAT2	0.00234791	2.34109
1989										PDE12	0.400311	1.53902							MDN1	0.00241608	1.52994
1990										ARNT	0.400892	1.60752							FPGS	0.00243055	1.83871
1991										POMT1	0.402589	1.72604							0610009E02RIK	0.00243067	2.52326
1992										PLCG1	0.403128	1.81125							SRFBP1	0.00243769	1.7079
1993										CDA	0.40417	1.8292							TMEM104	0.0024728	1.74811
1994										EMILIN1	0.404878	1.54274							SIRT6	0.00257	1.69489
1995										USP49	0.40509	1.8185							SERAC1	0.0026176	1.59406
1996										TAP2	0.407076	1.77206							ARHGAP19	0.00264778	1.66674
1997										SMARCAL1	0.410305	1.54833							TSSK4	0.00276534	2.18571
1998										UNG	0.411392	1.57964							SH2D6	0.00281063	1.50586
1999										PARD3	0.413346	1.50357							IL1RL2	0.00285586	2.38835
[truncated: 614 more rows]

## Sheet: DEG SGC clusters
Feature ID	P-value (DRC*1 vs. NAI*1)	FDR step up (DRC*1 vs. NAI*1)	Fold change (DRC*1 vs. NAI*1)			Feature ID	P-value (SCI*1 vs. NAI*1)	FDR step up (SCI*1vs. NAI*1)	Fold change (SCI*1 vs. NAI*1)			Feature ID	P-value (SNC*1 vs. NAI*1)	FDR step up (SNC*hg19 vs. NAI*hg19)	Ratio (SNC*1 vs. NAI*1)	Fold change (SNC*1 vs. NAI*1)			Feature ID	P-value (DRC*2 vs. NAI*2)	FDR step up (DRC*2 vs. NAI*2)	Fold change (DRC*2 vs. NAI*2)			Feature ID	P-value (SCI*2 vs. NAI*2)	FDR step up (SCI*variant_database;dbSNP_144 vs. NAI*variant_database;dbSNP_144)	Fold change (SCI*2 vs. NAI*2)			Feature ID	P-value (SNC*v2 vs. NAI*2)	FDR step up (SNC*2 vs. NAI*2)	Fold change (SNC*2 vs. NAI*2)			Feature ID	P-value (DRC*g3 vs. NAI*3)	FDR step up (DRC*3 vs. NAI*3)	Fold change (DRC*3 vs. NAI*3)			Feature ID	P-value (SCI*3 vs. NAI*3)	FDR step up (SCI*3 vs. NAI*3)	Fold change (SCI*3 vs. NAI*3)			Feature ID
GFAP	1.09705e-11	1.73086e-10	25.8766			EAF2	0.00315449	0.0316693	4.32144			PEAK1	0.00237538	0.0203794	27.4992	27.4992			PEAK1	1.29607e-27	3.50812e-26	17.1072			MANF	4.64158e-05	0.000909257	3.33032			PEAK1	1.57614e-11	2.10009e-10	13.953			PEAK1	1.29476e-12	2.37911e-11	15.8341			C1S1	0.00143659	0.0168559	3.38011			UBE2E3
SAA1	1.21111e-130	8.02128e-129	7.06047			GRIA2	0.000324777	0.00417957	3.58087			LY6D	0.00274521	0.023033	25.5925	25.5925			C1QL1	2.48229e-12	4.32391e-11	8.63124			H2-Q7	0.0004255	0.00714342	3.14268			SLC1A2	3.09277e-07	3.11534e-06	4.45063			C1QTNF1	2.66511e-11	4.56324e-10	6.54295			GM11571	1.27258e-09	3.16937e-08	3.25583			PEAK1
SLC4A11	0.00298426	0.0187247	5.01667			GAMT	0	0	3.22934			KLRA7	2.07973e-16	4.52509e-15	21.4678	21.4678			STBD1	1.68526e-06	1.97587e-05	6.17055			POLR1D	0.0021669	0.0294584	3.13363			TBCB	1.42271e-39	3.16799e-38	4.18035			GAMT	0	0	6.05068			MFAP1A	1.38009e-26	5.14505e-25	3.20343			SPRR1A
GPM6B	0	0	5.00609			B230369F24RIK	0.00216185	0.0229123	3.19699			MS4A4B	0.00519712	0.0402093	20.1314	20.1314			C1QTNF1	0.00353789	0.0220962	4.64368			MICAL2	0.000592332	0.00960534	3.05394			CRYM	1.74134e-15	2.6525e-14	3.87583			KLF9	4.75049e-61	2.231e-59	5.88403			GBP4	0.00015198	0.00224536	3.18792			ST13
PLP1	0	0	4.53059			GIMAP8	1.47892e-07	2.94498e-06	3.12215			KLHDC8A	2.81022e-18	6.48935e-17	15.6822	15.6822			GAMT	0	0	4.48161			GAMT	8.87459e-200	1.10663e-197	2.88374			POLR1D	1.44081e-11	1.9226e-10	3.81713			FSTL4	2.48476e-28	7.36509e-27	5.58624			GAMT	5.35759e-271	6.63497e-269	2.87027			CENPF
IL33	1.45999e-13	2.5334e-12	4.19416			FMNL3	3.27951e-259	3.63784e-257	3.06862			ST13	0.000150386	0.00170051	14.5218	14.5218			MXRA8	1.64599e-39	5.56281e-38	3.96511			MFAP1A	5.35272e-05	0.00103955	2.72054			ACE	2.05857e-09	2.42167e-08	3.65796			C1S1	5.28248e-06	5.78864e-05	5.44026			CIART	4.35493e-07	9.14535e-06	2.84464			XLR4B
MMD2	1.03077e-31	2.8985e-30	4.07775			GM10603	0.00113248	0.0127737	2.99423			KLK1	4.0558e-22	1.03286e-20	13.3522	13.3522			ACE	3.05757e-10	4.75766e-09	3.90997			FMNL3	1.16875e-134	1.09493e-132	2.71303			ARHGAP20	0.00492283	0.0239209	3.49532			FMNL3	0	0	5.30248			H2-Q7	0.00111865	0.0135475	2.79435			ZFP869
ALDOC	7.65018e-13	1.29274e-11	4.01734			RFTN1	1.17104e-05	0.000196233	2.89764			CD8B1	8.26485e-06	0.00010882	13.3219	13.3219			BICD1	1.03372e-34	3.19499e-33	3.83521			GM11571	1.81901e-05	0.000377607	2.7034			RBPMS	2.24641e-05	0.000183706	3.43736			CHCHD2	7.48766e-12	1.326e-10	5.06067			MXRA8	1.26182e-31	4.89593e-30	2.75997			HNRNPA0
PAQR6	2.20684e-22	5.07658e-21	3.98918			LYPD2	1.7791e-05	0.000290849	2.88474			GPX3	3.34148e-05	0.00041325	13.1952	13.1952			KLF9	1.77969e-99	1.07982e-97	3.71492			GM26851	0.00022639	0.00399742	2.63608			RIMS2	0.00014289	0.00102809	3.28458			MXRA8	1.91532e-47	7.85283e-46	4.97425			MARCKSL1	6.09185e-18	2.02104e-16	2.63561			THBS1
MBP	1.93908e-18	4.06734e-17	3.75484			DFNB59	0.00210299	0.0223409	2.62752			OCM	0.000879299	0.00847474	12.2458	12.2458			RPL8	3.32538e-05	0.000326241	3.70632			GM14548	4.3771e-08	1.16385e-06	2.52343			TRIM17	0.000151931	0.00108653	3.28411			FST	2.07936e-14	4.14977e-13	4.59987			MS4A6D	4.98371e-09	1.19987e-07	2.62207			ACTR3B
6030408B16RIK	4.06046e-42	1.35206e-40	3.68996			GM26851	0.000283177	0.00369417	2.60658			C130026I21RIK	0.000404873	0.00417123	11.7156	11.7156			STK32B	1.67922e-58	7.06094e-57	3.57378			BASP1	3.89387e-05	0.000773389	2.51247			5930403N24RIK	0.000925633	0.00553269	3.28384			BICD1	4.74154e-42	1.82408e-40	4.53705			FMNL3	3.90774e-169	3.38066e-167	2.60069			C130050O18RIK
PDGFRA	9.47919e-24	2.26113e-22	3.66235			MFAP1A	0.00158303	0.0173327	2.4865			RNASE6	3.61744e-10	6.38117e-09	11.3378	11.3378			ASTL	1.67276e-16	3.35312e-15	3.56758			STARD3	5.05194e-08	1.33544e-06	2.47146			2810021J22RIK	0.00519405	0.0250036	3.11144			ZBTB32	0.00696212	0.0385905	4.40545			FBXL21	9.12828e-05	0.00140467	2.47248			SPSB1
CMTM5	1.51623e-20	3.35146e-19	3.61337			GM14548	8.98773e-14	2.46223e-12	2.43154			KLRA6	5.71383e-16	1.2299e-14	10.546	10.546			SLC6A8	5.41868e-29	1.52372e-27	3.54941			MXRA8	1.36419e-16	4.77098e-15	2.44501			RNF32	0.000469702	0.00300413	3.09723			ASTL	2.25335e-29	6.85905e-28	4.39581			PIGO	0.00209073	0.0232344	2.41993			MKI67
FBLN5	4.15387e-35	1.23733e-33	3.41514			GM11571	1.15674e-05	0.000194197	2.41074			GPR6	1.55423e-16	3.40217e-15	9.59585	9.59585			MFAP1A	3.06232e-23	7.37281e-22	3.4212			MS4A6D	6.69942e-06	0.000147005	2.35509			DNAH8	0.00461849	0.0226429	3.06241			UBE2E3	1.11164e-05	0.000116858	4.22027			MANSC4	1.27068e-10	3.32011e-09	2.40551			ADCY1
LRRTM2	4.85704e-05	0.00044339	3.36702			MS4A6D	9.27519e-09	2.01085e-07	2.37974			ZEB2	3.19489e-12	6.15195e-11	8.91769	8.91769			SLC1A2	0.0022614	0.0151607	3.40529			SORL1	0.00103939	0.0157134	2.31726			GM14548	4.98515e-22	8.84558e-21	3.0196			ACE	1.87812e-29	5.7362e-28	4.14502			PMP22	8.21537e-11	2.17485e-09	2.39612			GGT1
CCL8	1.23228e-52	4.72054e-51	3.22135			LTF	4.73087e-06	8.26845e-05	2.36877			TUBB2B	1.54318e-05	0.000197468	8.87847	8.87847			TBCB	1.83784e-108	1.18256e-106	3.38971			SLC6A8	6.47523e-13	2.06488e-11	2.24502			RMND5B	7.30746e-20	1.24413e-18	2.93271			CEACAM16	3.73572e-05	0.000363343	4.03685			CHCHD2	4.08651e-12	1.1527e-10	2.37835			ZFP128
GSN	7.09043e-97	3.98143e-95	3.19593			NACC2	5.69341e-37	2.24765e-35	2.33467			TARM1	4.70825e-14	9.5867e-13	8.7999	8.7999			POLR1D	5.26123e-16	1.04307e-14	3.37064			PDF	0.00236477	0.0317663	2.20527			NCS1	0.00711014	0.0327872	2.85931			RPL8	1.60411e-20	3.85179e-19	4.02509			GM12802	0.000978229	0.012065	2.27115			ZFAND4
HMGCS2	1.1268e-07	1.3766e-06	3.16497			SLC6A8	1.48006e-17	4.53576e-16	2.33269			ITGAM	1.41569e-07	2.12424e-06	8.48739	8.48739			DARS	5.97095e-21	1.36314e-19	3.23609			SLC4A4	0.000104283	0.0019319	2.18084			LRRK1	2.45888e-07	2.50333e-06	2.8373			CDHR2	9.49457e-05	0.000867027	4.01959			FAM107A	4.62527e-20	1.6021e-18	2.22466			SPIN2C
SOSTDC1	3.28774e-26	8.29088e-25	3.14195			ZFP9	0.00372871	0.0365018	2.32195			AMPD1	6.6457e-31	1.97959e-29	8.23396	8.23396			SEMA4B	8.19362e-09	1.14755e-07	3.1842			ACOT11	0.00161947	0.0228941	2.17941			AIF1	1.4426e-51	3.64297e-50	2.83646			SLC6A8	6.20205e-29	1.86278e-27	3.74627			SCRG1	6.25893e-07	1.29953e-05	2.21659			OCM
BCL2A1B	8.95484e-49	3.27096e-47	3.13872			MXRA8	2.41888e-19	7.71354e-18	2.32176			TWIST1	0.00481758	0.0376433	8.21095	8.21095			GM15860	0.00109118	0.00792674	3.14045			IGSF6	4.55105e-06	0.000101589	2.1767			FGFRL1	9.00169e-06	7.74308e-05	2.82273			ASB18	4.68827e-07	5.69682e-06	3.72501			MANF	8.01156e-07	1.64237e-05	2.17231			TBCB
SERPINA3N	1.51892e-35	4.59257e-34	3.09829			ZEB2	0.000147919	0.0020463	2.29621			CYGB	0.000412401	0.00423913	8.01765	8.01765			MANF	1.89054e-17	3.91109e-16	3.06456			RPL7A	4.22923e-05	0.000834811	2.17554			B930094E09RIK	0.0102175	0.0442814	2.81177			STK32B	2.68411e-63	1.2873e-61	3.60027			NAIF1	0.001431	0.0168085	2.17201			PTGS1
S100B	7.2397e-06	7.3664e-05	3.07783			MANSC4	0.00128081	0.0142601	2.2942			CCNA2	0.0011116	0.0104627	7.93965	7.93965			LHFPL2	1.3068e-63	5.90708e-62	3.0329			APOE	0.000575406	0.00934763	2.17504			TUBB3	0.00446948	0.0220198	2.80158			SLC1A2	3.25653e-31	1.02939e-29	3.58272			SLC6A8	4.62833e-15	1.43269e-13	2.16542			AURKA
SLC22A17	2.40479e-14	4.31359e-13	2.9864			IGSF6	1.10506e-08	2.39002e-07	2.29156			MYCN	3.39003e-25	9.06733e-24	7.51015	7.51015			FAM47E	0.00082013	0.00615046	3.00695			ASTL	3.94808e-08	1.05756e-06	2.13358			USH1C	7.73167e-11	9.92871e-10	2.7977			FABP7	9.80469e-25	2.66986e-23	3.57739			ETNPPL	7.45068e-05	0.00116637	2.16043			SLC25A47
PLEKHB1	1.05318e-22	2.44762e-21	2.98093			CKM	0.00324977	0.0325163	2.28914			PI15	9.51044e-34	2.93444e-32	7.47279	7.47279			PMAIP1	1.12338e-10	1.78802e-09	2.93754			GM15873	4.37276e-05	0.00085939	2.12867			MYBPC3	0.000122521	0.000892547	2.7694			GM11571	2.60321e-09	3.86448e-08	3.51339			CEACAM16	0.00055063	0.00728839	2.14182			SLC1A2
FCGR2B	1.19994e-22	2.77799e-21	2.94991			CCSER2	7.19106e-07	1.36006e-05	2.28442			ATP2A1	2.11775e-22	5.416e-21	7.39826	7.39826			COL16A1	1.41482e-25	3.61319e-24	2.91715			ITIH5	0.000163418	0.00294887	2.10681			TMEM116	0.00849073	0.0379908	2.75801			SEMA4B	1.78635e-15	3.73399e-14	3.42857			HTR1A	3.71992e-13	1.07961e-11	2.11582			PWP2
LRG1	6.85785e-88	3.60456e-86	2.92937			HBA-A1	4.31608e-05	0.000662471	2.27253			RUNX2	1.08907e-05	0.000140955	7.34997	7.34997			GM11571	3.27603e-13	5.89979e-12	2.9046			RAB11FIP1	1.02176e-08	2.85101e-07	2.09357			TARSL2	0.0076154	0.0347274	2.74578			MFAP1A	9.04038e-23	2.33355e-21	3.40137			AOX2	5.19843e-10	1.32198e-08	2.11213			1810059H22RIK
TTYH1	2.87122e-16	5.66134e-15	2.92862			CWC15	4.343e-07	8.3627e-06	2.25693			UCN2	1.15197e-07	1.74884e-06	7.22667	7.22667			ADAMTS4	6.55509e-27	1.73532e-25	2.89873			CDS1	0.00126048	0.0185916	2.05927			EYA1	4.38076e-07	4.35211e-06	2.70166			GIMAP8	0.00158945	0.0108489	3.36655			ASTL	6.75597e-12	1.89681e-10	2.107			CHEK1
RAB3B	0.00368917	0.0226345	2.92251			GM27011	8.98103e-12	2.29035e-10	2.20747			SLFN1	0.00156217	0.0141724	6.83577	6.83577			SNX32	9.92486e-17	2.00729e-15	2.87522			CELSR2	2.40556e-07	6.04936e-06	2.05821			PAPLN	0.000205915	0.00143308	2.6661			MRPS24	1.07039e-19	2.52989e-18	3.347			C130026I21RIK	5.93391e-05	0.000949478	2.10072			MGAT5
ASPA	6.95701e-45	2.41439e-43	2.91695			MIR682	0.00195097	0.020935	2.18222			SSBP2	2.31027e-11	4.27991e-10	6.82173	6.82173			GM16283	0.00255876	0.0168666	2.7803			TARM1	1.49639e-05	0.00031315	2.03613			RP24-496O18.3	0.0118036	0.0498297	2.64134			PMAIP1	1.58345e-13	3.04579e-12	3.27202			GM4951	0.00163194	0.0187346	2.07827			RP23-350B16.1
PTN	5.51354e-13	9.36939e-12	2.90648			CDS1	2.5095e-09	5.64357e-08	2.15433			KLRA1	6.24083e-15	1.30754e-13	6.44394	6.44394			RAB34	4.29404e-06	4.77788e-05	2.75614			MARCKSL1	2.58445e-20	9.63494e-19	2.0361			AI607873	3.89364e-109	1.52054e-107	2.6387			DARS	8.83087e-20	2.09542e-18	3.20468			GPR132	1.03917e-05	0.000188269	2.05335			ACE
AW112010	3.92148e-05	0.000362311	2.90014			GM6465	1.51628e-05	0.000250832	2.13397			SH2D1A	7.46955e-11	1.35599e-09	6.42128	6.42128			MRPS24	1.08944e-17	2.28783e-16	2.7125			IGDCC3	0.00410132	0.0497024	2.01494			ITPR2	1.65496e-23	3.02256e-22	2.63489			RAB34	4.75342e-11	8.0399e-10	3.18034			CAPZA1	9.08497e-11	2.39105e-09	2.0399			4921531C22RIK
VAV3	3.66107e-06	3.88473e-05	2.89492			GALNT16	0.000101228	0.00145032	2.11516			GM17231	2.83385e-09	4.75755e-08	6.14703	6.14703			AI467606	0.000964805	0.00710286	2.67237			ADAMTS4	4.80705e-07	1.19391e-05	2.00986			FZD6	0.00137713	0.00791476	2.60452			HMGCS1	2.0926e-13	3.9996e-12	3.11864			UBE2E3	5.48544e-09	1.31542e-07	2.0309			IFI204
OSMR	5.82434e-09	7.8943e-08	2.81471			SEMA4B	1.89626e-10	4.58985e-09	2.10882			KIFC1	1.00545e-05	0.0001306	6.10755	6.10755			GM3667	1.28956e-05	0.000134312	2.65488			9130410C08RIK	1.99431e-18	7.26997e-17	-2.01993			RASL10A	0.00328854	0.0169209	2.60445			MANF	1.96145e-09	2.95049e-08	3.11606			ASB18	3.76999e-05	0.000623959	2.02218			GM10143
LYSMD2	6.21118e-19	1.31504e-17	2.81177			CCDC106	0.0029419	0.0299002	2.10754			RP23-350B16.1	4.77352e-09	7.8894e-08	5.85757	5.85757			GM4724	0.00728188	0.0406997	2.62579			OBFC1	0.000869274	0.0134682	-2.03052			NPHP4	0.011316	0.0480742	2.59373			ACOT9	5.21245e-13	9.73618e-12	3.11464			HAVCR2	2.6728e-07	5.70565e-06	2.02058			TINAGL1
TSPAN15	3.42798e-09	4.73502e-08	2.80335			PAOX	0.00020234	0.00270599	2.10558			AP1M2	7.9571e-05	0.000938502	5.82528	5.82528			GM13421	0.00849043	0.0460316	2.56256			RSAD2	0.000509135	0.0083536	-2.03482			IGFBP5	6.29427e-13	8.84967e-12	2.57156			ACSBG1	5.27019e-11	8.90563e-10	3.08671			TBCB	7.79103e-08	1.74128e-06	2.0039			GM12519
TSSK6	0.00253826	0.0161656	2.79493			DUXBL3	0.000495839	0.00617017	2.10535			DNHD1	0.000977849	0.00930552	5.82436	5.82436			TMEM173	7.41963e-07	9.02789e-06	2.54153			GPR4	2.77999e-14	9.22295e-13	-2.04995			IGFBP6	0.0115722	0.0489788	2.56247			SNX32	1.34258e-11	2.33639e-10	3.01972			GM14548	2.97445e-09	7.22863e-08	2.00144			AI462493
CDKN2A	2.47718e-35	7.42785e-34	2.77651			GKAP1	1.80999e-08	3.8547e-07	2.09885			MDN1	6.24437e-05	0.000750196	5.723	5.723			SLC4A4	7.27353e-15	1.38726e-13	2.53385			LDHA	1.05041e-06	2.52224e-05	-2.05275			TBXA2R	0.00807716	0.0365473	2.55169			BCAN	1.35779e-08	1.89654e-07	2.99565			ABHD14A	3.23639e-27	1.21911e-25	-2.00464			ITGAM
TMOD2	2.26626e-16	4.4734e-15	2.76862			THEMIS	2.32619e-06	4.17676e-05	2.09616			LDB3	0.00053517	0.00536683	5.64684	5.64684			TWIST2	5.05611e-07	6.24024e-06	2.53239			GPR85	0.000148121	0.00268894	-2.0532			PPP2R2C	1.83257e-07	1.88373e-06	2.54616			MANSC4	1.86969e-14	3.73958e-13	2.9626			GM20125	6.18685e-23	2.24177e-21	-2.00521			RP23-45A13.4
CADM1	7.87039e-28	2.06538e-26	2.76321			ANG	7.46071e-18	2.30988e-16	2.06825			PLEKHN1	0.00185235	0.0163937	5.62521	5.62521			LRRK1	2.93971e-06	3.34295e-05	2.5296			BATF3	2.45472e-16	8.55178e-15	-2.05775			GAMT	7.73332e-131	3.66037e-129	2.54149			PRSS35	1.76712e-11	3.0517e-10	2.96044			SARM1	0.000701127	0.009081	-2.00661			2810410L24RIK
TSPAN7	6.69827e-05	0.000596608	2.73797			SNED1	0.00211432	0.0224217	2.03842			ITPR3OS	7.80501e-09	1.26909e-07	5.59194	5.59194			MS4A6D	1.76825e-09	2.57629e-08	2.5284			TMEM50A	3.97025e-18	1.43572e-16	-2.06732			4930540M05RIK	0.000197609	0.00137846	2.52065			ADAMTS4	2.35153e-22	5.9969e-21	2.93062			GPR165	0.00416527	0.0413123	-2.01374			GAMT
EDNRB	8.90503e-17	1.7811e-15	2.73619			REM1	0.000248358	0.00327778	2.03673			9530034E10RIK	0.00424169	0.033682	5.49699	5.49699			THEMIS	5.12672e-05	0.00048583	2.50421			LAMP2	6.18345e-05	0.00118687	-2.07224			RAB9B	0.00876202	0.0390207	2.51425			A730018C14RIK	0.00137866	0.00958754	2.91442			1700034H15RIK	3.9e-05	0.000642806	-2.02331			ULBP1
TENM2	0.00151883	0.010228	2.7005			CATIP	4.97108e-06	8.65916e-05	2.03592			STAP1	1.16966e-31	3.51307e-30	5.47184	5.47184			PSMD7	2.81372e-36	8.98848e-35	2.48151			KCNK5	1.12634e-25	4.52562e-24	-2.08492			8430432A02RIK	0.00709526	0.0327436	2.50948			GUCY2D	3.41305e-12	6.14655e-11	2.88844			OSBPL6	0.000618161	0.00811101	-2.03798			RNFT2
DYSF	0.00827496	0.0450119	2.69954			BICD1	3.2302e-14	8.98542e-13	2.03415			RPL7A	1.46357e-37	4.85555e-36	5.45524	5.45524			FBRSL1	3.31992e-06	3.74703e-05	2.46532			PCBD1	4.19966e-05	0.00082988	-2.08596			GM14005	1.39962e-10	1.77217e-09	2.50761			ADAMTSL3	0.00612342	0.0346534	2.86621			TCRG-C1	2.64327e-07	5.64928e-06	-2.10711			AI607873
NKAIN4	3.89696e-12	6.34212e-11	2.69857			CDH19	2.52834e-42	1.03898e-40	2.03331			DGAT2	0.00452542	0.0356377	5.44208	5.44208			AIF1	9.46121e-07	1.13667e-05	2.44318			TBC1D10C	1.95861e-05	0.000404728	-2.09994			8030423J24RIK	6.79387e-12	9.1535e-11	2.50022			CAPZA1	4.70558e-07	5.71401e-06	2.82396			1190002F15RIK	0.00201487	0.0225439	-2.13268			NIN
EMP2	3.61929e-12	5.92221e-11	2.68496			SLC4A4	2.46231e-05	0.0003968	2.0269			HES5	0.000467859	0.00473913	5.422	5.422			BTK	5.49652e-19	1.19882e-17	2.42211			UBA52	1.30318e-13	4.24554e-12	-2.10389			CUBN	0.0088967	0.0394445	2.49381			COL16A1	5.37554e-14	1.04849e-12	2.79373			GDAP1L1	1.95263e-05	0.000338825	-2.18899			IL18BP
FDPS	0.00171363	0.0113453	2.67304			WDR86	2.86709e-05	0.000457142	2.02182			POLR3GL	9.9266e-05	0.00115053	5.40001	5.40001			MESP1	6.24496e-09	8.8353e-08	2.41005			GM17382	0.000393	0.00664097	-2.10725			GM2174	7.34452e-19	1.22168e-17	2.47722			CREB3L1	2.85577e-13	5.41249e-12	2.77984			PDE8B	7.46462e-05	0.00116653	-2.19887			KIFC1
SEMA3B	5.77983e-15	1.06638e-13	2.63853			MRPS24	2.41058e-23	8.17744e-22	2.0157			GM26541	0.00017899	0.0019928	5.37865	5.37865			MANSC4	2.02481e-10	3.18076e-09	2.3989			D10JHU81E	2.71043e-13	8.70467e-12	-2.10741			CES1F	0.00225062	0.0121727	2.47327			SLC4A4	2.15355e-13	4.11175e-12	2.75779			FUCA1	5.73512e-13	1.6565e-11	-2.20047			GM16586
MPZ	1.64455e-08	2.17045e-07	2.56168			TSPAN10	6.33509e-09	1.38842e-07	2.00816			PNMT	1.77749e-18	4.14161e-17	5.1478	5.1478			WDR86	9.78149e-07	1.17281e-05	2.36784			TUBB4B	1.83864e-05	0.000381244	-2.11367			AHR	1.81901e-06	1.69533e-05	2.47034			LRRTM1	2.06404e-08	2.83156e-07	2.7492			ATP5L	7.20779e-22	2.57049e-20	-2.21751			FST
CYP4F14	0.00110796	0.00774673	2.53436			KCNN2	0.00355021	0.0350801	2.00784			PPP4R4	0.000355748	0.00370523	5.12111	5.12111			RP23-4H17.1	0.000334685	0.00271975	2.35706			STAP1	8.30388e-09	2.32419e-07	-2.11478			GRAMD1B	6.16417e-28	1.19972e-26	2.45411			MYL12A	2.501e-15	5.17991e-14	2.71214			GM10642	3.34574e-05	0.000560651	-2.22491			IRGM2
KLHL6	2.11955e-23	4.99006e-22	2.51636			PMAIP1	4.73953e-05	0.000720735	2.00383			MTAP7D3	0.00484657	0.0378208	5.11329	5.11329			SYT3	0.00397992	0.0244101	2.35586			RGS16	0.00057518	0.00934763	-2.11496			LGI3	0.00295232	0.0154504	2.44579			CD34	8.70624e-11	1.44023e-09	2.70127			FAM154B	7.81253e-09	1.85622e-07	-2.27847			LRIG1
NDNF	0.00327818	0.0203687	2.51098			BEST1	0.00522037	0.0486293	-2.02787			XCL1	7.40438e-07	1.05168e-05	5.06543	5.06543			PDIA2	1.46879e-06	1.73236e-05	2.33463			SPACA1	0.00172548	0.0240914	-2.11821			MT-ND1	9.82812e-05	0.000727989	2.44076			A930041C12RIK	6.23398e-15	1.26933e-13	2.69984			CERK	6.36414e-20	2.19599e-18	-2.29556			XRCC2
CELF6	0.00491002	0.0289462	2.51072			PTPRH	4.41362e-10	1.04045e-08	-2.03088			OCEL1	0.0020771	0.018108	5.00857	5.00857			GABRQ	2.88873e-13	5.2127e-12	2.33433			ANGPTL3	0.00408547	0.0496101	-2.12064			THBS2	0.00159346	0.00897832	2.43504			PDIA2	7.24169e-11	1.20568e-09	2.69257			ZMYND12	1.10728e-06	2.24447e-05	-2.33587			NUSAP1
NPPC	0.000275274	0.00218299	2.50442			CCR8	4.53913e-09	1.00578e-07	-2.03154			ITGA2	0.000164091	0.00184281	4.92684	4.92684			DHRS7C	2.41428e-13	4.374e-12	2.3342			TST	1.41356e-12	4.46828e-11	-2.12701			INPP5J	0.000802306	0.00486143	2.43325			PPP3CA	7.70252e-11	1.27653e-09	2.69198			UBA52	4.36978e-27	1.64262e-25	-2.34773			AURKB
GSTA4	9.59003e-12	1.52103e-10	2.48415			RTN4RL1	1.05196e-14	2.95808e-13	-2.03356			RP24-272D15.1	1.58847e-06	2.20762e-05	4.85708	4.85708			COL6A6	1.5091e-17	3.13632e-16	2.31331			ACE2	0.00147499	0.0210491	-2.12974			BUB1B	0.000101661	0.000750394	2.43077			HTR1A	2.21259e-12	4.01263e-11	2.66904			HS6ST2	4.47751e-09	1.08232e-07	-2.35842			NUDT9
GM12227	7.95569e-05	0.000701008	2.48375			FAM186A	0.00171218	0.0186157	-2.03512			GM21859	0.00550222	0.0423343	4.85573	4.85573			NKAPL	0.00733274	0.0408955	2.30937			SLC25A4	0.000103735	0.00192373	-2.15635			RND1	0.00109814	0.00645296	2.39918			GABRQ	2.89262e-11	4.9341e-10	2.65081			ARID3B	0.00128014	0.0153084	-2.4132			NDUFA4
PHGDH	1.07181e-07	1.31297e-06	2.48301			RNF150	0.000800386	0.00946486	-2.03753			DCN	5.44738e-07	7.85439e-06	4.77322	4.77322			NME5	2.90232e-06	3.30667e-05	2.30362			ADSSL1	2.6094e-07	6.55286e-06	-2.16727			4930590J08RIK	3.07557e-165	1.84749e-163	2.39329			LRP2	1.80349e-09	2.72357e-08	2.63943			KIFC1	0.00283548	0.0300907	-2.42222			AKR1C14
SLC17A8	0.000170774	0.00141446	2.48138			GIMAP6	0.00117553	0.0132039	-2.04921			GM13199	2.57339e-05	0.000323121	4.76481	4.76481			CREB3L1	2.04201e-08	2.78653e-07	2.29366			GM13205	0.00317956	0.0407728	-2.17115			4930518I15RIK	0.0114798	0.048633	2.39189			P2RY10	8.2624e-08	1.08021e-06	2.63612			RINL	9.0076e-06	0.000165012	-2.65697			GM10273
ARTN	0.00516348	0.0302139	2.47846			ERBB3	3.86431e-10	9.15734e-09	-2.07095			NDUFB3	1.84135e-14	3.78766e-13	4.69543	4.69543			NUCB2	0.000125588	0.0011197	2.28903			GPR34	1.51854e-07	3.87259e-06	-2.17613			MFAP1A	3.17571e-12	4.3238e-11	2.38891			GM15156	2.91287e-14	5.75603e-13	2.63275									TTC9B
TNFRSF13B	1.18472e-16	2.36173e-15	2.47044			LPL	0.00197854	0.021177	-2.07326			CCNB2	8.29096e-53	3.60358e-51	4.67536	4.67536			NCF2	7.84921e-09	1.10359e-07	2.2869			SERP2	6.84703e-05	0.0013018	-2.19103			NDUFB3	1.06448e-57	2.80976e-56	2.38454			TBCB	5.52303e-112	3.65794e-110	2.62787									PLLP
FABP5	1.88013e-15	3.56339e-14	2.46756			PDZRN3	0.00265291	0.0274413	-2.08247			TNS4	1.00359e-21	2.52027e-20	4.65112	4.65112			MYL12A	0.000781294	0.00588607	2.285			DOCK8	2.13611e-07	5.41696e-06	-2.22089			UNC93B1	2.846e-09	3.32634e-08	2.37576			MARCKSL1	1.21882e-33	4.02879e-32	2.62374									CCDC103
AQP1	1.60678e-15	3.06782e-14	2.46595			AI607873	5.03554e-27	1.8065e-25	-2.08315			GM5127	5.44025e-09	8.96674e-08	4.59016	4.59016			NACC2	2.62649e-20	5.892e-19	2.27808			OSBP2	3.98778e-06	8.9569e-05	-2.23504			IL25	4.4888e-07	4.44967e-06	2.362			NUCB2	1.43678e-09	2.18674e-08	2.61632									A230056P14RIK
PEAR1	3.73466e-12	6.10545e-11	2.4327			FURIN	6.96154e-05	0.00103343	-2.08424			ZFP30	9.39676e-43	3.40487e-41	4.58545	4.58545			CD180	2.8938e-24	7.0611e-23	2.27751			RASSF3	6.93193e-07	1.68917e-05	-2.23753			VMN1R90	0.000243958	0.00166015	2.36196			CD248	3.08872e-13	5.84176e-12	2.60861									MOB1B
ATP1B2	3.34422e-21	7.48351e-20	2.42382			SLC2A13	7.14685e-09	1.56254e-07	-2.09709			SLC25A16	1.82485e-61	9.03975e-60	4.56724	4.56724			CD248	8.88212e-12	1.50091e-10	2.27429			MPZL3	0.00293346	0.0381308	-2.24571			SLC13A5	0.00955086	0.0416922	2.34807			WFDC18	6.49896e-06	7.05329e-05	2.60414									SSR4
PTGER4	4.57519e-07	5.2825e-06	2.41979			CNTN2	1.24246e-05	0.000208009	-2.10108			CIITA	0.00038023	0.00394205	4.56475	4.56475			LTBP4	5.04854e-12	8.62785e-11	2.26956			CCR1	0.000474179	0.0078298	-2.27297			H2-Q6	0.000201301	0.00140259	2.34619			BTK	5.35709e-14	1.04602e-12	2.58726									UBE2T
SLC27A1	9.70477e-08	1.19288e-06	2.41478			FBXO44	0.000310609	0.00401439	-2.13084			SPTBN1	1.00739e-52	4.35756e-51	4.55817	4.55817			GKAP1	2.37275e-09	3.4487e-08	2.25223			FLNC	0.00251626	0.0334287	-2.32712			4931429P17RIK	0.00122415	0.00712387	2.34059			NOS2	4.04798e-12	7.26107e-11	2.58333									TICAM2
KLF5	1.64633e-06	1.80627e-05	2.40875			GCNT4	0.000323631	0.00417076	-2.13677			SDR42E1	0.00237015	0.0203583	4.55209	4.55209			IGSF6	8.97454e-20	1.99347e-18	2.25194			VAMP8	0.000175994	0.00316318	-2.33858			C230014O12RIK	4.47491e-11	5.81256e-10	2.34013			CXCL9	6.97857e-12	1.23705e-10	2.55743									SLC31A2
KIF21A	6.62625e-07	7.52098e-06	2.40505			MS4A4A	0.000276486	0.00361995	-2.14325			IFI204	1.04183e-10	1.87997e-09	4.54393	4.54393			HTR1A	1.10733e-06	1.31981e-05	2.24591			LGALS9	0.0021854	0.0296431	-2.34712			EDEM1	6.8769e-17	1.09167e-15	2.33711			LTF	0.00952068	0.0498822	2.55264									ECEL1
WNT6	1.20879e-06	1.34416e-05	2.40032			STARD3	1.78449e-26	6.37656e-25	-2.16989			BC030307	5.46127e-07	7.86189e-06	4.52621	4.52621			ATP10D	5.03542e-25	1.26628e-23	2.23544			DDIT4	3.86955e-16	1.34291e-14	-2.36632			9930111J21RIK2	4.18825e-32	8.49918e-31	2.33618			MYLK2	6.15454e-14	1.19737e-12	2.54701									SV2A
MAL	6.1577e-21	1.37115e-19	2.39996			GM13212	1.99604e-06	3.60544e-05	-2.17396			GM13248	0.000747931	0.00731387	4.52019	4.52019			MT-ND4	4.77194e-12	8.1706e-11	2.22304			CHST1	1.09798e-10	3.31982e-09	-2.37346			NLRP5	0.000134507	0.000972421	2.32908			AP1S2	2.29235e-25	6.28951e-24	2.54365									TRERF1
SCG3	6.22075e-12	9.99798e-11	2.3959			TNFRSF12A	0.00286936	0.0293278	-2.17985			CD9	1.6763e-08	2.68698e-07	4.48382	4.48382			MRGPRF	0.000206246	0.00175902	2.19006			D330050G23RIK	0.00100116	0.0152118	-2.3751			SGK1	0.00349015	0.0178415	2.32614			GM24407	7.00813e-05	0.000653839	2.53089									TOMM22
SH3GL2	0.00410144	0.0247689	2.38578			HNRNPA1	2.59054e-14	7.21719e-13	-2.1804			MFNG	1.4011e-07	2.10585e-06	4.48013	4.48013			TCAM1	0.000264659	0.00220013	2.18926			ICOSL	2.99428e-08	8.12906e-07	-2.40992			PIK3R3	0.00241495	0.0129185	2.31693			SLC39A14	0.00367729	0.0223793	2.53078									NOD1
ABCA8A	0.00353788	0.021795	2.38508			BSND	4.55458e-05	0.000694955	-2.20352			GM26801	0.000433363	0.00443192	4.47022	4.47022			FGF2OS	0.00494544	0.0293136	2.17291			ATP5L	1.31149e-15	4.49111e-14	-2.41005			KCNE1L	0.0020342	0.0111253	2.29763			WDR86	9.47562e-12	1.665e-10	2.52572									WDR93
MYL1	0.00569352	0.0327953	2.38218			ATG9B	2.36779e-06	4.24723e-05	-2.20585			SCG2	0.00189579	0.0167291	4.46233	4.46233			MT-ND1	1.12086e-05	0.000117417	2.17137			IGFBP3	0.0033642	0.0424777	-2.42278			GM12278	2.31133e-05	0.000188588	2.2962			THEMIS	1.54639e-08	2.1442e-07	2.52559									MFNG
CYP2J6	2.37774e-09	3.34048e-08	2.38007			DOK3	7.57106e-05	0.00111567	-2.23704			GLRB	0.00012389	0.00141775	4.45664	4.45664			GM26577	6.68702e-05	0.000620359	2.16821			CDR1	0.000402078	0.00677538	-2.44314			PARD6B	0.00277124	0.0146169	2.29132			SNTG2	0.000924449	0.00670745	2.52351									GPR132
GLB1L	0.00227614	0.0146406	2.37128			ARL4D	2.06969e-09	4.70719e-08	-2.26271			MKI67	0.000727612	0.00714609	4.45518	4.45518			A930041C12RIK	0.000248441	0.00207966	2.15641			CD81	0.000685075	0.0109424	-2.44358			FRAS1	0.00208124	0.0113551	2.28497			ST6GALNAC5	0.00178236	0.011958	2.52056									PTK7
GM13483	0.00700275	0.0389487	2.3699			AP1M2	7.11282e-25	2.46373e-23	-2.26341			XYLB	0.000295004	0.00313394	4.43185	4.43185			GM20675	4.12326e-05	0.000398464	2.15267			ZPBP	0.00175945	0.024509	-2.45722			GM26456	2.75735e-16	4.29791e-15	2.28055			B3GALT2	0.0028101	0.0177259	2.51992									SNTG2
SLC9A3R1	0.000309665	0.00242699	2.36931			GSG1	1.91013e-12	4.99091e-11	-2.33077			ZWILCH	0.00245863	0.0209394	4.43136	4.43136			GM2174	1.01387e-09	1.51127e-08	2.1481			ANGPT2	4.36985e-19	1.61247e-17	-2.47669			PFKFB3	0.00690093	0.0319692	2.2805			LHFPL2	2.12773e-28	6.31714e-27	2.49406									SLC8A1
CYP2J9	1.3809e-08	1.82916e-07	2.3674			ISL2	0.000379534	0.00480894	-2.33604			CKAP2L	0.00171438	0.0153911	4.42845	4.42845			MYOF	5.62152e-05	0.000528288	2.14633			IFITM10	3.24435e-05	0.000649625	-2.55035			TECTB	0.000855371	0.00515002	2.27498			NACC2	5.38332e-16	1.14244e-14	2.48366									GM9949
FOXD1	1.17775e-49	4.32825e-48	2.36066			GAB3	0.00300509	0.0303908	-2.34661			TMEM50A	3.21623e-39	1.089e-37	4.40339	4.40339			NKAIN2	1.33744e-05	0.000138899	2.14443			GM14664	0.00297291	0.0385881	-2.60343			HOMEZ	0.00145938	0.00832138	2.25842			NCF2	1.96786e-12	3.58318e-11	2.47244									MFSD9
SCD1	4.33833e-08	5.49694e-07	2.35632			ZFP954	0.00225737	0.0238687	-2.40089			CAR9	0.000789618	0.00767585	4.39769	4.39769			FABP7	1.54558e-05	0.000159234	2.13706			GM996	0.000112978	0.00208871	-2.62445			ETAA1OS	0.00516752	0.0248958	2.25391			ABHD4	2.16046e-10	3.48779e-09	2.47171									TLX2
MBOAT2	6.57654e-10	9.55104e-09	2.35097			ATP5L	6.73216e-11	1.66745e-09	-2.40183			GM16485	0.00157223	0.0142494	4.37704	4.37704			GM15156	7.27476e-05	0.000671097	2.12896			ABHD15	6.91985e-06	0.000151474	-2.64733			4930528D03RIK	3.45931e-103	1.30037e-101	2.24965			ESD	4.34438e-15	8.88583e-14	2.45405									1810062O18RIK
ME1	0.000235971	0.00189166	2.33876			3010003L21RIK	0.00484675	0.0455006	-2.40951			CTLA4	4.65138e-10	8.12575e-09	4.33758	4.33758			TFEC	1.97007e-17	4.07096e-16	2.12843			GJB1	0.00088923	0.0137538	-2.65187			NUDT9	5.31228e-09	6.11403e-08	2.24596			TNFSF14	3.74126e-173	3.41645e-171	2.45001									TMEM205
HCLS1	3.15493e-31	8.74912e-30	2.33361			PRKCB	4.55846e-05	0.000694955	-2.41203			DDHD1	1.15951e-55	5.25442e-54	4.28256	4.28256			TNFRSF13C	4.2866e-05	0.000412266	2.11784			HNRNPA1	5.34726e-10	1.5721e-08	-2.6699			RPL36-PS3	1.83407e-36	3.91983e-35	2.24293			ALDH16A1	6.94059e-10	1.08746e-08	2.43834									GCA
HIST1H2BC	3.11368e-11	4.82007e-10	2.33328			THNSL1	0.000635963	0.00774329	-2.43			IFI27	4.94011e-15	1.04105e-13	4.26207	4.26207			SIGLECE	2.12669e-06	2.46492e-05	2.11471			NELL2	0.000497589	0.00817158	-2.67154			TEP1	6.27309e-05	0.000478985	2.23913			ZFP933	0.00518269	0.0301798	2.42811									CASC5
MMP2	1.93247e-09	2.7319e-08	2.33082			SERPINI1	4.26822e-21	1.41085e-19	-2.45185			GM9913	5.98862e-05	0.000721387	4.25659	4.25659			ESD	2.72045e-08	3.67626e-07	2.11295			DUSP14	3.46907e-08	9.37582e-07	-2.74257			PPP1R27	3.3255e-13	4.71405e-12	2.23587			ITGBL1	9.62862e-17	2.08747e-15	2.4218									CBLN2
TSC22D4	3.37652e-30	9.22218e-29	2.32866			GM5150	0.000676536	0.00815496	-2.48605			PRKCDBP	3.34218e-43	1.22081e-41	4.24527	4.24527			BCAN	7.23633e-05	0.000668234	2.1043			CNTF	0.00112046	0.016743	-2.74578			2900011O08RIK	0.00904104	0.0399197	2.23375			CD209B	1.72752e-15	3.6152e-14	2.41955									FMNL3
PLA2G16	3.70116e-08	4.73272e-07	2.326			PLEKHF1	0.000162138	0.00221924	-2.4996			CHST1	5.16899e-21	1.26984e-19	4.24216	4.24216			PPP3CA	3.80672e-06	4.26717e-05	2.10355			GM11946	0.000244805	0.00429739	-2.84061			GM17080	1.54916e-06	1.45509e-05	2.23273			IGSF6	4.6007e-16	9.78649e-15	2.41818									CD46
BRSK1	0.00836894	0.0453865	2.32275			SLC20A1	0.00525683	0.0488431	-2.50237			BFSP1	0.000653315	0.00645144	4.21366	4.21366			4930528D03RIK	1.27659e-27	3.46058e-26	2.09527			CHCHD2	6.73213e-15	2.26673e-13	-2.91525			TTC21B	0.000982556	0.0058267	2.23271			CBFA2T3	2.72864e-15	5.64491e-14	2.39848									GM11127
AF251705	1.55367e-58	6.32702e-57	2.31982			1810041L15RIK	5.49095e-08	1.12564e-06	-2.50498			GM340	0.000319574	0.0033653	4.21277	4.21277			ATP5B	2.81262e-13	5.08041e-12	2.09492			RHOA	1.09823e-06	2.63007e-05	-2.94272			HMBOX1	0.00189075	0.0104419	2.22049			ACOT7	2.28007e-12	4.13086e-11	2.39789									APOE
RCSD1	1.41174e-05	0.000138126	2.3198			UBE2E3	2.05526e-12	5.35464e-11	-2.55467			CLDN3	0.000160176	0.00180333	4.20409	4.20409			5930403N24RIK	0.0052776	0.0309957	2.09424			GPR132	1.77997e-14	5.93793e-13	-2.94965			SIGLECG	4.23083e-20	7.2441e-19	2.21482			DHRS7C	1.06152e-08	1.50065e-07	2.39718									ZBP1
MTRF1L	0.00018804	0.00154403	2.31916			TMEM140	0.00317728	0.031845	-2.57027			BTF3	2.30549e-10	4.10695e-09	4.18353	4.18353			SEC11A	1.46848e-17	3.05895e-16	2.07421			SPTB	0.000315719	0.00542634	-2.95517			CCNB2	2.16789e-141	1.13288e-139	2.21178			CIART	0.00121298	0.00851723	2.39656									TTF2
FDFT1	9.77919e-07	1.09417e-05	2.31811			MPO	9.59797e-05	0.001385	-2.58057			AIF1	4.8332e-10	8.43524e-09	4.15466	4.15466			GM15677	0.00765071	0.0422408	2.06678			LPL	4.82333e-05	0.000941799	-3.16425			SLC9A9	1.07013e-07	1.12103e-06	2.2017			EHD1	1.61267e-08	2.22585e-07	2.38804									GM13496
MLC1	0.000155633	0.00129917	2.31537			RLTPR	0.000156006	0.00214506	-2.60243			CCSER2	2.29604e-10	4.09416e-09	4.15078	4.15078			TRIM7	0.00367577	0.0228077	2.05365			SOX9	3.73772e-08	1.00568e-06	-3.16506			ITGBL1	3.31028e-05	0.000264019	2.19731			MS4A6D	7.27169e-05	0.000676334	2.3875									ZFP606
SHISA4	4.26425e-18	8.86228e-17	2.31212			H2-DMB1	7.11167e-06	0.000121422	-2.60894			DEPDC1A	0.000155342	0.00175327	4.11384	4.11384			CD209B	6.3942e-10	9.66668e-09	2.04701			GM4279	1.57762e-06	3.70936e-05	-3.20552			SLFN1	1.94909e-10	2.44562e-09	2.19704			ATP5J	5.94842e-13	1.10994e-11	2.38062									TM6SF2
LECT1	3.34053e-06	3.57186e-05	2.29782			UBA52	1.07765e-17	3.32509e-16	-2.64215			TFEC	1.58121e-09	2.67946e-08	4.10323	4.10323			UBE2D2A	7.95476e-29	2.22647e-27	2.0453			PPP1R1C	7.55284e-05	0.00142848	-3.36473			NES	1.55458e-08	1.73401e-07	2.18888			CD180	2.77473e-14	5.48906e-13	2.38012									SMTNL2
NTN5	6.27355e-10	9.12567e-09	2.29505			ZFP869	0.00527907	0.0490246	-2.68681			COX4I1	1.03169e-10	1.86353e-09	4.08124	4.08124			FUCA1	3.98259e-61	1.7478e-59	2.02112			HS6ST3	4.16666e-06	9.34707e-05	-3.65629			CHST8	0.00767935	0.0349749	2.18232			HINT1	2.36572e-18	5.40766e-17	2.37633									ADAMTSL1
SLFN2	4.30082e-15	8.00856e-14	2.29359			TNFAIP3	7.23203e-11	1.78637e-09	-2.76053			PGAM1	4.17307e-19	9.91501e-18	4.07419	4.07419			WIF1	9.79793e-267	1.10035e-264	2.01441			GIMAP8	0.000711043	0.0112874	-4.07148			TPD52L1	0.000281348	0.0018897	2.17936			ZBTB39	0.00509327	0.0297261	2.36295									FAM129C
C4B	3.59446e-08	4.60605e-07	2.2855			H6PD	0.000658307	0.00796177	-2.83217			SLFN4	2.60891e-05	0.0003269	4.06985	4.06985			E130309D14RIK	0.00448832	0.0270692	2.01096			ASB18	5.8497e-05	0.00113	-4.50777			PIK3CD	1.26055e-63	3.50107e-62	2.17589			APOE	2.36098e-09	3.52509e-08	2.35848									TALDO1
ATP8B1	1.94361e-10	2.89476e-09	2.28439			LBR	6.40493e-10	1.5001e-08	-2.85177			CX3CR1	1.57145e-05	0.000200802	4.06698	4.06698			AI607873	9.49745e-137	7.40187e-135	2.00279			UBE2E3	2.39178e-07	6.0315e-06	-7.15965			VAMP2	4.00799e-17	6.41882e-16	2.17387			SYCE1	0.00752683	0.0412152	2.35426									RPP40
RETNLG	6.99925e-05	0.000620969	2.28143			SH3BGRL2	4.55359e-07	8.75887e-06	-2.89365			4930528D03RIK	1.67088e-27	4.70579e-26	4.05783	4.05783			MSTN	0.00065571	0.00503435	2.00037									AMD2	5.67351e-05	0.000436708	2.16458			NDRG1	2.92243e-10	4.69276e-09	2.33521									GM16386
GPR155	0.00081621	0.00584471	2.27301			ABHD3	1.03027e-10	2.52758e-09	-2.96003			TNFRSF22	0.00263008	0.0221906	4.05452	4.05452			EVX1	4.2046e-08	5.59407e-07	-2.00065									H2-OB	1.3679e-07	1.41994e-06	2.16049			SIGLECE	3.05094e-06	3.43916e-05	2.32022									CCNA2
FBLN1	1.06782e-22	2.47847e-21	2.27004			MIR8114	0.000260808	0.0034246	-3.09768			CD8A	0.000689111	0.00678639	4.05386	4.05386			CAR14	3.71566e-12	6.41057e-11	-2.00206									DCLK2	2.50919e-07	2.55023e-06	2.15903			GM15677	2.47309e-07	3.09025e-06	2.31837									CCR5
EGFL8	3.05935e-05	0.000287207	2.26823			SMIM14	3.38637e-07	6.57668e-06	-3.20994			RHOA	4.22732e-47	1.64375e-45	4.05344	4.05344			CST7	5.19642e-05	0.000492176	-2.00333									FMNL3	1.13085e-69	3.33555e-68	2.15175			SLC32A1	1.78026e-35	6.09637e-34	2.31272									BPIFB5
GNG4	0.000755295	0.00544735	2.26661			GSTM7	5.78981e-07	1.10544e-05	-4.4642			SMIM6	3.0691e-06	4.18179e-05	4.04804	4.04804			PODN	0.00451934	0.0272108	-2.00859									RP24-188N22.2	4.23728e-06	3.81355e-05	2.15103			GPC3	2.54219e-08	3.45344e-07	2.30748									RAB11FIP3
MAP1A	1.23424e-05	0.000122013	2.26058									ANG	6.46767e-17	1.43487e-15	4.03735	4.03735			NBEA	0.00451706	0.0272062	-2.00976									TNIP3	1.19131e-06	1.13369e-05	2.14722			PLBD1	6.85399e-06	7.42077e-05	2.3074									DOCK3
MSMO1	0.00244364	0.0156235	2.26044									ACTL6B	9.01221e-05	0.00105061	4.02826	4.02826			GM16853	4.95469e-76	2.48849e-74	-2.01									NME2	1.06591e-22	1.91009e-21	2.14675			DSCAML1	1.01354e-05	0.000107131	2.30309									GM9776
MS4A8A	3.08368e-46	1.08899e-44	2.26026									CDH19	5.79676e-22	1.47e-20	4.00464	4.00464			AP1G2	0.00249391	0.0165416	-2.01256									MANEA	0.00162225	0.00911214	2.14497			TRIM40	6.50786e-09	9.36106e-08	2.29744									THY1
GAMT	5.34146e-16	1.04297e-14	2.25675									MROH7	6.95601e-07	9.9189e-06	3.99206	3.99206			PPIB	4.32611e-40	1.48426e-38	-2.01321									S100A11	6.58827e-07	6.42516e-06	2.14268			CYB5RL	0.00162229	0.0110398	2.28287									MFAP1A
PRNP	3.23327e-68	1.42587e-66	2.25642									FFAR2	2.3278e-25	6.24465e-24	3.98679	3.98679			FAM43A	6.39778e-05	0.000594747	-2.01384									ZADH2	0.00211231	0.0115108	2.13854			GM14548	2.39233e-08	3.25967e-07	2.27824									ATXN1
KCNA1	0.00176387	0.0116396	2.25039									PPP1R3FOS	0.000741437	0.00725821	3.95547	3.95547			KCNK5	3.35302e-59	1.43663e-57	-2.01495									GSG2	0.00886214	0.0393218	2.13832			GM21975	8.48823e-09	1.20847e-07	2.2756									PEX11A
IL4RA	2.11149e-14	3.80257e-13	2.23571									TFAP2E	8.7958e-18	1.98796e-16	3.94438	3.94438			SELL	3.17758e-08	4.2719e-07	-2.017									PLSCR2	3.76814e-12	5.11883e-11	2.12514			ITGA5	7.28531e-07	8.71202e-06	2.27439									IFI27
CLEC4N	1.65625e-80	8.11563e-79	2.2291									ABAT	2.28728e-06	3.14976e-05	3.93092	3.93092			GM10269	6.19241e-13	1.10528e-11	-2.01735									ACACB	0.0021408	0.0116519	2.12121			A730049H05RIK	8.73708e-10	1.35485e-08	2.27363									CENPE
NDRG2	1.25731e-09	1.79427e-08	2.22722									GM5868	3.51478e-10	6.20613e-09	3.92851	3.92851			PLEKHD1OS	5.01733e-11	8.13618e-10	-2.01823									POU3F4	0.00665356	0.03099	2.11347			GM26577	0.00253186	0.0161648	2.26986									ASPRV1
GM16047	0.00921989	0.0491175	2.22167									ZFP236	0.000754781	0.00737687	3.91822	3.91822			SLC27A2	1.54177e-07	1.97148e-06	-2.01895									EFCAB12	0.00182773	0.0101309	2.10658			LY6C2	1.9862e-18	4.55164e-17	2.26547									CEP97
GM11444	0.000263126	0.00209309	2.21665									CRLF1	1.71151e-11	3.19028e-10	3.86046	3.86046			TMEM248	0.000314522	0.00256627	-2.01968									KRT4	3.65001e-98	1.32522e-96	2.09648			DMRTA1	5.77047e-09	8.36568e-08	2.26499									GLP2R
FAM171B	1.41903e-07	1.71278e-06	2.21092									ABHD17B	2.87846e-51	1.20475e-49	3.83936	3.83936			ATRAID	7.28004e-29	2.04078e-27	-2.02086									CDCA8	9.47201e-06	8.1206e-05	2.09317			ATP10D	5.07846e-19	1.17421e-17	2.26447									DUSP2
ENTPD2	4.56744e-20	9.98595e-19	2.20389									LDB2	5.64552e-67	3.0746e-65	3.81943	3.81943			ATP6V0D2	0.000166604	0.00145174	-2.02117									ANKEF1	0.00324386	0.0167445	2.09253			MYOF	9.736e-05	0.000888176	2.26287									ECE2
CKB	2.94991e-31	8.19313e-30	2.20081									DAB1	0.000234706	0.00253485	3.80825	3.80825			CDT1	9.01993e-12	1.52278e-10	-2.02335									GM17518	0.00300264	0.0156774	2.0895			WNK4	2.41347e-08	3.28447e-07	2.25547									TRPM6
SOX2	4.79555e-09	6.53909e-08	2.1971									PIK3R5	0.00263553	0.0222263	3.80626	3.80626			CCNA2	0.00164972	0.0114637	-2.02517									2610034M16RIK	0.0105806	0.0455385	2.08894			PPHLN1	6.86873e-11	1.1457e-09	2.2534									ONECUT2
GM8773	0.00157455	0.0105623	2.19663									SRI	3.0159e-15	6.3853e-14	3.8005	3.8005			GM14812	4.34474e-06	4.82835e-05	-2.02623									GM12676	0.0054118	0.0259551	2.0877			NPR3	0.00926162	0.0488647	2.25172									DCN
RNASEL	1.37324e-06	1.52328e-05	2.19352									TMEM9B	1.20303e-24	3.18012e-23	3.77435	3.77435			EFNA5	6.40438e-11	1.03299e-09	-2.02795									GM13073	8.06453e-19	1.33898e-17	2.08394			SQLE	0.00029128	0.00238094	2.24992									MFAP2
PAQR5	1.37839e-07	1.66484e-06	2.18928									GRAMD1B	9.62116e-08	1.4705e-06	3.75135	3.75135			GM996	0.00304759	0.0196657	-2.02843									ERP29	2.88313e-12	3.94028e-11	2.0829			SLC44A1	4.89924e-13	9.16062e-12	2.24316									NFATC3
VIPR2	0.000540719	0.00403497	2.18816									EXO1	0.00412732	0.0329424	3.73204	3.73204			MYL10	1.82638e-07	2.32065e-06	-2.03188									ABHD17B	5.51259e-130	2.59566e-128	2.08043			GKAP1	2.26753e-09	3.39116e-08	2.24004									TSPAN12
CTLA2A	3.82437e-34	1.12988e-32	2.18092									NUF2	0.000564151	0.00563559	3.7158	3.7158			TRPM2	2.39315e-18	5.12684e-17	-2.03245									PKD2L1	0.00949488	0.041508	2.07743			RP23-184B11.4	3.1314e-11	5.33134e-10	2.23813									6530411M01RIK
DNAH2OS	0.000719519	0.00521428	2.17891									XKR6	0.00296379	0.024627	3.7123	3.7123			WNT10A	0.00770409	0.0424688	-2.03673									PCDHB9	0.0111862	0.0476573	2.07536			CRYM	7.38096e-35	2.50385e-33	2.23304									ARL4AOS
JAM3	1.85713e-08	2.44209e-07	2.17751									KLRE1	0.000684324	0.00674292	3.71023	3.71023			OPN3	0.000676787	0.00517202	-2.04226									CSMD2	0.000944322	0.0056295	2.06275			KLRB1B	4.53712e-10	7.20243e-09	2.2311									GPR6
MIA	0.0039081	0.0237521	2.16083									ZKSCAN17	8.05446e-06	0.000106379	3.70681	3.70681			COL4A3BP	0.00355279	0.0221663	-2.04372									EPAS1	8.09648e-11	1.03824e-09	2.05894			UBE2D2A	5.18913e-31	1.63173e-29	2.2247									USP51
SOX10	9.75784e-08	1.19858e-06	2.15604									KCNE4	9.5639e-09	1.54812e-07	3.70447	3.70447			RP24-167M10.2	0.00628296	0.0360299	-2.04644									TMEM40	4.78437e-07	4.73488e-06	2.05597			CDH23	1.14246e-10	1.87449e-09	2.21675									A230072C01RIK
LDHB	5.77284e-16	1.12598e-14	2.15511									CHRM4	2.36046e-12	4.58427e-11	3.68115	3.68115			ULBP1	3.89163e-05	0.00037729	-2.04706									MMP28	0.000306824	0.0020456	2.05113			TCAM1	0.00927095	0.0488711	2.20691									PLCD3
CNTFR	4.4057e-08	5.57725e-07	2.15152									SVIP	9.87166e-60	4.79811e-58	3.65152	3.65152			FBXO44	2.00242e-15	3.8889e-14	-2.04782									AU021092	0.00405307	0.0202917	2.05027			ECH1	4.26182e-39	1.55046e-37	2.20106									2610307P16RIK
PCYT2	2.16267e-05	0.000206895	2.14956									GM15859	0.00554876	0.0426422	3.64466	3.64466			RP23-306A2.2	7.74994e-16	1.52477e-14	-2.04851									CDKN1A	5.08418e-143	2.69581e-141	2.04955			CEBPB	0.00884245	0.0470078	2.1972									NEIL3
HTRA1	2.24618e-12	3.70897e-11	2.14807									5033426O07RIK	0.00460564	0.0362221	3.64324	3.64324			FGF7	3.45472e-05	0.00033783	-2.0488									LTBP4	1.34091e-13	1.93187e-12	2.04862			ANPEP	2.46995e-32	7.97484e-31	2.18709									GBP8
SYT11	3.74077e-08	4.77324e-07	2.14468									CCNB1	8.95889e-08	1.37392e-06	3.63936	3.63936			ANGPT2	2.10574e-54	8.42342e-53	-2.05358									GM15954	0.00596082	0.0281919	2.04771			GM26353	5.88027e-08	7.81199e-07	2.18652									GABRR2
PEBP1	6.02437e-22	1.37015e-20	2.14303									ASPRV1	7.5875e-11	1.37602e-09	3.63182	3.63182			GUCY1B3	0.00354556	0.0221365	-2.06258									AKT3	0.000213359	0.00148033	2.03691			PIRA2	1.49142e-23	3.95401e-22	2.18645									LRRC25
OAT	1.7354e-15	3.29252e-14	2.13368									SLC31A2	9.68431e-27	2.70637e-25	3.58635	3.58635			PLA2G4A	8.39908e-11	1.34631e-09	-2.06298									BC028528	6.451e-07	6.29808e-06	2.03208			APOL7C	8.23207e-12	1.45356e-10	2.17586									NENF
CD59A	4.28869e-24	1.03254e-22	2.11601									KL	0.00240105	0.0205459	3.58128	3.58128			TOMM70A	5.10823e-06	5.6147e-05	-2.06337									DARS	1.19319e-11	1.59807e-10	2.03113			TEKT5	1.59243e-07	2.03483e-06	2.17552									TULP2
TSPAN3	8.07696e-12	1.28443e-10	2.11504									PHF2OS1	0.00582583	0.0445211	3.5729	3.5729			E030042O20RIK	0.0082464	0.0449512	-2.06349									SMOC1	3.69557e-05	0.000292172	2.02685			LGI3	0.0002056	0.00174038	2.17152									SLC32A1
LPAR1	0.00021772	0.00175977	2.11412									SUGP2	0.00246993	0.0210159	3.57064	3.57064			SPEER4C	0.00139204	0.00986268	-2.06609									CCDC63	1.03515e-05	8.81604e-05	2.0251			ESP8	1.32966e-08	1.86081e-07	2.16974									ATP5D
FGL2	2.10522e-10	3.1226e-09	2.11168									TSPAN33	6.19995e-08	9.57312e-07	3.54717	3.54717			RASL11B	5.66065e-81	2.98397e-79	-2.06748									UCP2	1.01027e-124	4.56668e-123	2.01919			MSTN	8.41384e-06	8.98586e-05	2.16855									NUDT7
ACP5	9.96915e-15	1.81889e-13	2.11086									1700106J16RIK	1.1792e-06	1.65279e-05	3.54568	3.54568			XRCC6BP1	0.00210707	0.0142773	-2.07307									ECE2	4.18502e-15	6.31104e-14	2.0176			ELF3	2.51118e-13	4.7694e-12	2.16153									PTPN21
AA467197	4.28888e-33	1.24076e-31	2.10585									RFX5	0.00103997	0.00985003	3.53752	3.53752			GPATCH3	0.0089032	0.047905	-2.07516									P2RY6	7.19609e-08	7.62676e-07	2.01749			TLR1	2.63909e-19	6.15709e-18	2.16054									WIF1
TIFAB	4.54982e-05	0.000416744	2.10419									GLP2R	0.00239224	0.0204899	3.52617	3.52617			GM829	1.42629e-09	2.09835e-08	-2.08107									TESK1	0.000788898	0.00478982	2.01583			ATL2	0.000518907	0.00399759	2.15961									9130410C08RIK
PSPH	3.82165e-12	6.2364e-11	2.09051									KCNK10	5.00589e-13	9.94632e-12	3.51796	3.51796			TBC1D2	0.00582167	0.0337129	-2.08349									IFI205	3.10613e-43	7.22805e-42	2.01487			WDPCP	8.04155e-07	9.55317e-06	2.15659									NUF2
FGR	2.35538e-17	4.7744e-16	2.09045									GM16314	0.000452915	0.00460394	3.5014	3.5014			ELF4	1.68409e-12	2.96206e-11	-2.0847									GBP9	0.00842825	0.0377767	2.01388			SEMA3C	6.49107e-09	9.34435e-08	2.14325									KBTBD8
CRYBB1	0.00437406	0.0261705	2.09029									4930506M07RIK	0.000320699	0.00337321	3.50011	3.50011			DDX26B	3.32702e-06	3.7527e-05	-2.08734									SEPW1	1.30496e-72	3.91943e-71	2.01102			PSMD7	3.54412e-26	9.98151e-25	2.14284									GM16853
PARP3	0.000984608	0.00693792	2.08379									NGF	8.26674e-44	3.05043e-42	3.49095	3.49095			RP24-317L8.1	3.70183e-10	5.70612e-09	-2.09431									GAS7	3.50966e-48	8.64553e-47	2.0034			MT-CO2	1.61212e-18	3.70377e-17	2.1365									FBF1
MATN2	1.88924e-27	4.90795e-26	2.07227									GM12264	1.1288e-09	1.93458e-08	3.48651	3.48651			LBR	6.80695e-10	1.02735e-08	-2.09683									ARHGAP19	8.14417e-06	7.05581e-05	-2.00296			HOXA4	0.00247984	0.0158775	2.13428									BMP3
CRIP3	0.00479604	0.0284039	2.06909									GCA	8.64073e-06	0.000113212	3.47467	3.47467			CTSH	3.84319e-08	5.1321e-07	-2.09699									PRPF40A	0.00297825	0.0155635	-2.00365			4930570G19RIK	1.93573e-134	1.49572e-132	2.13413									NDUFB3
FMNL3	0.00039634	0.0030404	2.05955									CR974586.4	2.99931e-06	4.09287e-05	3.46137	3.46137			GJB5	1.02717e-09	1.52859e-08	-2.09703									MAP2K1	0.00190538	0.0105118	-2.00399			OLFR558	1.06252e-06	1.25237e-05	2.13342									CCNB2
NTRK2	1.6718e-07	2.00582e-06	2.05486									AQP7	0.00143304	0.0131327	3.45434	3.45434			2410088K16RIK	1.50331e-08	2.07333e-07	-2.10351									NFKBIB	5.57882e-05	0.000430152	-2.00419			PMP22	1.1029e-08	1.55793e-07	2.13026									PRKCDBP
FAM184A	0.00883921	0.0474671	2.05397									SHISA9	4.98479e-11	9.09485e-10	3.44635	3.44635			ATP5D	1.63495e-40	5.6415e-39	-2.10362									UBA1	8.73486e-05	0.000653164	-2.00465			PPIA	1.06748e-09	1.64545e-08	2.12151									PLK1
PRKAR2B	0.0016523	0.0109957	2.05325									GLTSCR2	2.07893e-12	4.04618e-11	3.43599	3.43599			ZPBP	0.00803696	0.0440619	-2.10886									THBS4	4.73643e-05	0.000368817	-2.00623			TYRP1	2.17504e-12	3.94849e-11	2.11542									LRRC27
KCNN4	1.6252e-06	1.78525e-05	2.05204									GM3667	9.04716e-65	4.71821e-63	3.43303	3.43303			2810055G20RIK	2.57738e-131	1.93367e-129	-2.10952									1700028I16RIK	4.15598e-10	5.10144e-09	-2.0063			THBS2	0.00683704	0.038002	2.11515									GM4117
SOCS2	6.02111e-06	6.17864e-05	2.04481									CYB5R2	0.00012761	0.00145664	3.42962	3.42962			AURKB	0.000916075	0.00678278	-2.11616									PDE10A	0.00822712	0.0370866	-2.00697			MCEMP1	8.95254e-09	1.27157e-07	2.11473									FRMPD3
DCLK1	5.21605e-12	8.42818e-11	2.04369									GM26964	2.12262e-08	3.37547e-07	3.42196	3.42196			BID	3.23826e-06	3.65943e-05	-2.11629									ACADVL	0.00161723	0.00908957	-2.00765			CST3	2.63312e-25	7.20264e-24	2.10982									AMBP
TECR	2.41801e-17	4.89585e-16	2.04043									IL1R2	3.59584e-24	9.47761e-23	3.41979	3.41979			HPS4	0.0019549	0.0133635	-2.12242									HAUS8	7.04916e-07	6.84878e-06	-2.00928			MEOX2	1.97366e-09	2.9664e-08	2.10465									CD93
PPP1R14C	3.8437e-07	4.48663e-06	2.03954									CHAC1	0.000927122	0.008893	3.39479	3.39479			CYTIP	2.4614e-05	0.000246153	-2.12246									RNF5	2.84792e-26	5.44326e-25	-2.00953			ARPC5	1.30176e-11	2.27193e-10	2.10285									SLFN1
KCNH2	1.28245e-05	0.000126503	2.03746									CPNE7	9.60541e-17	2.12058e-15	3.39374	3.39374			ATP5L	6.94058e-06	7.48317e-05	-2.1247									GPS1	0.000185416	0.00130144	-2.00993			EIF5	3.04564e-20	7.28416e-19	2.10165									NGF
SFRP5	6.56937e-05	0.000586572	2.03557									RNMT	0.00563475	0.0432069	3.36994	3.36994			CHST2	4.14042e-35	1.28852e-33	-2.12661									NRAS	1.21618e-06	1.15614e-05	-2.01028			TSPAN10	2.1744e-12	3.94849e-11	2.10064									RP24-427N13.9
WDR78	0.00506048	0.0296872	2.03444									PDCD4	5.71081e-05	0.000690683	3.34371	3.34371			CYB5R4	1.99862e-06	2.32243e-05	-2.12817									IFI204	2.17071e-44	5.0906e-43	-2.01081			GM13157	0.000249516	0.00207133	2.09858									COLGALT1
HCK	1.84171e-35	5.54075e-34	2.03155									GM5901	1.78781e-18	4.1538e-17	3.33259	3.33259			RDH11	5.17217e-38	1.71278e-36	-2.14448									TMEM222	0.000192827	0.00134875	-2.01187			ZEB2	1.72143e-34	5.78534e-33	2.09038									TCHH
RGCC	3.28569e-20	7.21855e-19	2.0273									CCDC129	5.45064e-06	7.27866e-05	3.33254	3.33254			A430104N18RIK	2.97221e-12	5.15228e-11	-2.14727									FUNDC2	0.00878985	0.039097	-2.01342			FAM47E	0.00307168	0.019125	2.08675									TTLL13
FLI1	7.10875e-30	1.92993e-28	2.02483									GM11454	2.30826e-08	3.66102e-07	3.33172	3.33172			CD74	3.36946e-10	5.21603e-09	-2.15043									VPS36	1.90146e-05	0.000156916	-2.01503			RNASEH2B	0.000464957	0.00362053	2.08611									TMC7
TBC1D8	2.03286e-05	0.000195512	2.02228									CNDP2	0.000139899	0.00158491	3.32371	3.32371			CCL4	3.88975e-07	4.82708e-06	-2.1545									RPL12	0.000276923	0.00186204	-2.01641			DKK3	8.85276e-22	2.20782e-20	2.08559									ADRB3
MAP1B	6.57368e-07	7.46599e-06	2.01951									ZFP58	0.000442624	0.00450878	3.3191	3.3191			SPOCK2	0.00328846	0.0209657	-2.15706									VAMP3	0.00449738	0.0221391	-2.01916			FBRSL1	6.28959e-17	1.37512e-15	2.08438									BTF3
ADAMTS9	0.000374685	0.00288899	2.01928									GM13032	0.00312712	0.0258062	3.31363	3.31363			C330027C09RIK	0.00554275	0.0323077	-2.15945									DNAJC3	0.00467387	0.0228833	-2.01952			OTOF	5.99272e-07	7.20921e-06	2.07905									ADRA1B
GIMAP4	5.94009e-12	9.57244e-11	2.01795									SH3BP2	0.00248612	0.0210842	3.30398	3.30398			ADAMTSL1	0.000183519	0.00158387	-2.16152									GPR114	1.69007e-06	1.58005e-05	-2.02036			L1CAM	1.78295e-07	2.2607e-06	2.06832									EEF2
METRN	3.64085e-20	7.98911e-19	2.01551									GM17200	1.14047e-05	0.000147186	3.29868	3.29868			HMOX2	3.48646e-10	5.38792e-09	-2.16154									2410088K16RIK	3.63693e-14	5.35063e-13	-2.02137			TSPAN18	1.74295e-05	0.000177745	2.06545									FRS3
ATP6V0E2	6.50451e-07	7.39674e-06	2.00976									NTNG1	7.54111e-05	0.000893518	3.29606	3.29606			OCM	5.96404e-11	9.6282e-10	-2.1651									PARL	5.69464e-05	0.000438148	-2.02365			SLITRK6	0.00243884	0.0156705	2.06321									2810008D09RIK
SYT9	0.00489705	0.0288921	2.0057									GM10719	1.16682e-05	0.00015048	3.29476	3.29476			HSH2D	1.07655e-09	1.59681e-08	-2.17577									NDUFA9	0.00268058	0.0141884	-2.0241			MCTP2	0.000951265	0.00686072	2.06172									EPB4.1L4B
TEX40	3.94543e-09	5.42077e-08	2.00492									ST8SIA2	0.00166914	0.0150373	3.29253	3.29253			CPED1	1.10154e-39	3.74836e-38	-2.18056									SNRNP40	1.4077e-05	0.000118164	-2.02527			ID3	3.58319e-10	5.73691e-09	2.06084									FAM101B
AHR	6.24134e-06	6.38652e-05	-2.00324									MIF	3.03067e-48	1.19645e-46	3.29137	3.29137			GM13212	0.000134651	0.00119344	-2.1862									CUX1	0.00630319	0.0296252	-2.0267			ARPC1B	1.01813e-14	2.05684e-13	2.05715									CPLX1
HOXB9	8.15578e-23	1.90277e-21	-2.00335									SORT1	1.04739e-43	3.857e-42	3.25339	3.25339			GM26773	1.26793e-11	2.12273e-10	-2.1927									PSMC1	0.000143719	0.00103365	-2.02689			1700015F17RIK	0.000790427	0.00583573	2.0543									GRAMD1B
CTSA	0.000105783	0.000912093	-2.00337									GM26841	0.000385693	0.00398954	3.23747	3.23747			AIRN	1.29429e-05	0.000134727	-2.19471									AKT1	2.4228e-05	0.000197149	-2.02758			RNF187	2.71563e-08	3.68075e-07	2.05186									LAMP2
SNRPG	3.8478e-07	4.48852e-06	-2.01361									MAS1	2.70919e-14	5.53501e-13	3.23201	3.23201			GM11627	2.47858e-06	2.84541e-05	-2.19843									AIMP1	0.00307703	0.0160149	-2.0283			ANGPT4	3.56468e-23	9.35456e-22	2.04743									GM15751
1600014C10RIK	1.71116e-06	1.87398e-05	-2.01511									TPX2	0.000191444	0.00211712	3.20264	3.20264			DCK	0.000123608	0.00110423	-2.20066									CHMP3	0.000125069	0.00090964	-2.02996			CSRNP3	0.00208067	0.0137102	2.04692									GABRG2
RPS28	0.00337495	0.0208767	-2.01836									CHRM5	5.96584e-53	2.61182e-51	3.19775	3.19775			TCRG-C1	5.0456e-15	9.65391e-14	-2.20453									DCTPP1	0.000423606	0.00273175	-2.03291			FAM19A5	0.00167555	0.011368	2.0453									FIRRE
RASSF4	0.000318967	0.00249017	-2.01973									PPP2R2B	8.72496e-78	5.38416e-76	3.19636	3.19636			TMEM50A	7.10394e-56	2.86711e-54	-2.21515									ADRBK1	0.00202527	0.0110967	-2.03293			CCT7	3.04614e-17	6.7414e-16	2.04426									ARHGEF39
ARHGAP18	1.04869e-11	1.65747e-10	-2.01988									TBX6	0.00154218	0.0140121	3.18615	3.18615			YTHDC2	0.00863857	0.0467227	-2.21618									XRCC6BP1	7.0691e-05	0.000534797	-2.03318			FBN1	1.34632e-09	2.05599e-08	2.04358									CRYM
COL14A1	3.50064e-08	4.49538e-07	-2.0291									MT-ND2	0.00014627	0.00165501	3.17566	3.17566			SNORA2B	8.51437e-09	1.19155e-07	-2.2231									MRPS9	3.63055e-06	3.28713e-05	-2.03603			FAM107B	9.09717e-14	1.75921e-12	2.0422									GLO1
UBE2D3	0.000210475	0.00170808	-2.03378									NAT10	0.00402714	0.0322046	3.16648	3.16648			GM8281	3.46828e-11	5.69056e-10	-2.22354									ARRDC2	0.00475968	0.023272	-2.03623			MARCKS	6.62912e-06	7.18162e-05	2.04159									BRINP1
TNFRSF11A	4.04678e-37	1.25721e-35	-2.04089									QSOX1	0.00517985	0.0401114	3.16605	3.16605			RPL29	1.07733e-13	1.98768e-12	-2.22497									PLRG1	0.000109631	0.000804803	-2.03641			TMPRSS4	1.70844e-08	2.35264e-07	2.03838									MANSC4
MAN2B1	3.89716e-13	6.68495e-12	-2.0424									RP23-170A19.1	2.59679e-05	0.000325833	3.15473	3.15473			LPGAT1	1.32537e-06	1.56832e-05	-2.23025									KIFC5B	1.47651e-06	1.38901e-05	-2.03693			GM21989	0.00112911	0.00799038	2.03831									ID3
IER3IP1	6.23992e-06	6.38652e-05	-2.04429									PIF1	4.32772e-06	5.80917e-05	3.14181	3.14181			FFAR2	1.57464e-10	2.48656e-09	-2.23704									OCM	5.17115e-52	1.3132e-50	-2.03703			COLEC12	8.30015e-07	9.85391e-06	2.03687									MC5R
DISC1	0.00587121	0.0335913	-2.04811									ADAMTS6	0.000337242	0.00352671	3.13562	3.13562			CDC45	0.0013873	0.00983293	-2.23822									CTAGE5	1.00318e-07	1.05395e-06	-2.04011			GM16352	0.000747243	0.00556382	2.02945									KCNB1
RASSF5	3.33792e-08	4.29558e-07	-2.05236									RIMS4	1.60766e-07	2.40232e-06	3.12851	3.12851			2810408M09RIK	3.69955e-27	9.90986e-26	-2.23855									OPN3	0.000144673	0.00104009	-2.04063			MAPRE2	1.88057e-05	0.000191349	2.02898									GLRX5
MRPL52	0.000133967	0.00113348	-2.0541									UCP2	3.95115e-52	1.68492e-50	3.12778	3.12778			CHST11	0.00384986	0.0237494	-2.24033									BLOC1S2	1.65017e-05	0.00013718	-2.04112			GM12060	0.00172906	0.0116741	2.02735									CTSD
UNC93B1	1.81127e-13	3.13094e-12	-2.06051									RP23-188J8.5	2.06398e-33	6.30387e-32	3.12553	3.12553			GM11846	5.52756e-10	8.39864e-09	-2.24118									CENPM	0.00735394	0.0337564	-2.04332			GM16838	0.00574217	0.0328039	2.02457									ARL4A
DENND2C	0.00193616	0.012661	-2.06729									KCNRG	0.00338207	0.0276327	3.12251	3.12251			SLIRP	1.49005e-10	2.3571e-09	-2.24479									TRPC4AP	2.90956e-05	0.000233916	-2.04578			TIMD4	7.55665e-10	1.17989e-08	2.02211									PSMD2
DERA	2.19744e-11	3.4273e-10	-2.06779									TTC22	2.6078e-17	5.8356e-16	3.12175	3.12175			GM10505	7.19656e-11	1.1556e-09	-2.25174									EMD	0.000532951	0.0033658	-2.04704			GM2897	1.03226e-14	2.08306e-13	2.02193									GPR114
MGL2	0.000314046	0.00245919	-2.06996									NUDC	7.50673e-36	2.41511e-34	3.11306	3.11306			INTS7	0.0084415	0.0458076	-2.26477									PSMD6	0.00489614	0.0238104	-2.04749			DPCR1	6.80138e-05	0.000636521	2.02052									UBTD1
DUSP1	4.4913e-07	5.18896e-06	-2.07493									SEPW1	2.47539e-26	6.82278e-25	3.0981	3.0981			CHD2	0.000207931	0.00177173	-2.26515									TRIM59	6.77145e-07	6.59155e-06	-2.04906			F9	4.54565e-07	5.53095e-06	2.01927									SNW1
LRRFIP1	1.84742e-31	5.17078e-30	-2.07699									RABAC1	3.61057e-37	1.19347e-35	3.08828	3.08828			9530080O11RIK	4.29384e-06	4.77788e-05	-2.26626									UNC13D	0.000161936	0.00115319	-2.04941			SRRM2	2.70649e-58	1.22035e-56	2.01483									BCO2
GM11808	1.8752e-10	2.79518e-09	-2.07917									ADRA1A	3.66932e-10	6.46007e-09	3.08127	3.08127			1700086P04RIK	0.00325729	0.0208552	-2.26782									RPS6KA1	1.37219e-15	2.09549e-14	-2.05118			TFEC	2.21291e-08	3.0266e-07	2.01409									GM26773
HMGA1	0.00018363	0.00150988	-2.08257									ZFP536	2.37559e-50	9.78427e-49	3.05959	3.05959			HNRNPH3	1.65388e-17	3.4254e-16	-2.27383									EMID1	3.61582e-05	0.000286493	-2.05329			TSC22D3	2.33748e-15	4.85234e-14	2.0079									TMEM255B
CLEC4A3	4.47515e-51	1.67874e-49	-2.08841									SPRR1A	0.00518003	0.0401114	3.05852	3.05852			RAB14	2.33406e-31	6.80679e-30	-2.27652									PRKCSH	0.000162314	0.00115543	-2.05564			CLEC4G	2.89376e-06	3.27627e-05	2.00337									MAN1A
KCNK13	0.00263876	0.0167467	-2.08956									RASAL1	1.58819e-26	4.39756e-25	3.05502	3.05502			OLFR56	2.75255e-12	4.77628e-11	-2.28403									IGFN1	0.000423367	0.00273175	-2.05995			ACTL9	7.81021e-09	1.11457e-07	-2.0015									ISOC2B
GRAP	3.36753e-09	4.65862e-08	-2.10064									POU3F1	1.24976e-26	3.47646e-25	3.05222	3.05222			JDP2	0.00023012	0.0019443	-2.28492									FAM46A	5.26172e-06	4.69118e-05	-2.06007			SESTD1	0.00157937	0.0107924	-2.00393									GM5428
LTB	0.00521557	0.0304221	-2.10494									ACAT3	0.005957	0.0453892	3.03816	3.03816			ACTL9	1.4747e-13	2.70426e-12	-2.29058									TCN2	0.00120122	0.00701302	-2.06013			ATP6V0D2	0.00043167	0.00338026	-2.0062									SLC25A16
RPL27-PS3	6.31916e-13	1.07283e-11	-2.10503									CLMP	0.000106091	0.00122571	3.03351	3.03351			SLC6A6	7.43263e-12	1.25951e-10	-2.29119									ABCF2	5.917e-07	5.80181e-06	-2.06247			ADCYAP1R1	0.000373797	0.00297082	-2.00826									SUSD2
CCT4	2.07999e-07	2.47912e-06	-2.10526									GM10033	4.17847e-07	6.07323e-06	3.03329	3.03329			ARHGAP27OS3	1.85211e-11	3.07511e-10	-2.29685									4632434I11RIK	0.000643893	0.00398434	-2.06312			MID1	6.56213e-05	0.000615724	-2.00838									LAMTOR3
DAPP1	2.15394e-06	2.34328e-05	-2.12121									ULK1	0.00423544	0.0336472	3.02804	3.02804			LRRC49	0.00257159	0.0169326	-2.29992									VPS45	0.00386748	0.0195166	-2.06337			NCS1	7.16359e-05	0.000667654	-2.01265									PSMA7
ADRBK1	0.000715171	0.00518693	-2.1257									EZR	2.81597e-12	5.44552e-11	3.02519	3.02519			KCTD13	3.31195e-30	9.53558e-29	-2.30072									NAGLU	2.16882e-09	2.5464e-08	-2.06388			FGFR3	0.000579204	0.00442068	-2.01752									WDFY4
TNFAIP6	0.00523144	0.0304931	-2.12839									GM23582	1.78841e-18	4.1538e-17	3.02357	3.02357			PSMD4	5.83394e-25	1.46505e-23	-2.32215									MAPK1	7.53672e-05	0.000568271	-2.06427			DHRS3	4.26272e-18	9.6827e-17	-2.02362									FNDC7
SIK1	3.86468e-13	6.63602e-12	-2.12907									C78197	2.30443e-19	5.49688e-18	3.01668	3.01668			CRLF1	9.30698e-41	3.22374e-39	-2.33088									CLEC14A	1.21318e-09	1.44313e-08	-2.06581			MYBPC3	3.75544e-07	4.61605e-06	-2.02391									SNAP91
GM10076	2.93165e-08	3.79707e-07	-2.1311									GM9979	0.00552869	0.0425199	3.01403	3.01403			RP24-427N13.9	5.55203e-11	8.9791e-10	-2.33727									ELDR	0.00491733	0.0239006	-2.06721			CLDN15	1.30763e-09	2.00003e-08	-2.02517									TMPPE
P4HB	1.81442e-06	1.98226e-05	-2.13181									KCNG2	2.57733e-10	4.56869e-09	3.01196	3.01196			CACNG6	4.75916e-12	8.15643e-11	-2.34249									MIR8106	3.46498e-08	3.76957e-07	-2.06893			LDLRAD4	3.91926e-16	8.39403e-15	-2.03131									EXOC2
CACNB3	3.15565e-05	0.000295634	-2.1339									HNRNPH3	1.70741e-19	4.08356e-18	3.00744	3.00744			CEACAM16	3.63641e-07	4.52512e-06	-2.34693									EML3	0.00117284	0.00686283	-2.07086			UBA52	4.4266e-05	0.000425504	-2.03253									GM829
TMEM8	0.00116177	0.00806992	-2.13854									IGF1	3.2619e-18	7.52275e-17	3.00306	3.00306			LPL	4.09243e-06	4.57325e-05	-2.36437									PTPLB	3.47554e-05	0.000276298	-2.07496			VASN	0.000328101	0.00265669	-2.03522									RBMXL1
PCK2	5.15964e-06	5.36466e-05	-2.13905									SFR1	0.000363731	0.00378184	2.99442	2.99442			IFITM10	5.77738e-05	0.000541528	-2.37109									PRELP	4.8819e-17	7.79079e-16	-2.07776			CLEC2L	0.00231437	0.0149825	-2.03601									EIF2A
ARID5A	3.71621e-06	3.94093e-05	-2.15606									LYPD2	1.00844e-20	2.46733e-19	2.99235	2.99235			BATF	1.01003e-25	2.58674e-24	-2.37458									TCF25	0.0025102	0.0133648	-2.07837			ELOVL7	3.67205e-05	0.000357343	-2.0418									SEC11C
SFRP4	3.39499e-17	6.85863e-16	-2.15817									WIF1	8.40096e-16	1.80401e-14	2.98558	2.98558			EFCAB2	0.00594289	0.0343302	-2.37477									SRSF11	0.000735764	0.00450022	-2.08057			TNFRSF22	0.000803016	0.0059166	-2.04353									COX7A1
ANO1	1.25776e-07	1.52322e-06	-2.1636									AA474331	0.002768	0.0232027	2.98494	2.98494			ICOSL	0.000403502	0.00323248	-2.38044									UBALD2	0.000348875	0.00229132	-2.0814			1190002F15RIK	0.00018503	0.00159311	-2.04385									MED10
YDJC	0.000171576	0.0014204	-2.17568									ZBP1	5.04539e-05	0.000612665	2.96769	2.96769			TREML4	0.00139812	0.00990182	-2.38796									RBBP4	2.5359e-05	0.000205705	-2.0819			DDIT4	1.01296e-47	4.17204e-46	-2.04574									BLVRA
NRP1	1.60264e-15	3.06313e-14	-2.18403									ARHGAP10	0.0021379	0.0185933	2.96586	2.96586			SHC2	0.000365758	0.00295367	-2.39314									PDIA4	0.0011004	0.00646406	-2.08195			GM11627	1.57729e-07	2.01833e-06	-2.05246									LLPH
RNASE4	6.16667e-38	1.9324e-36	-2.18788									RPS6KA2	0.00194143	0.0170651	2.96448	2.96448			ADAMTS10	0.00101433	0.00742217	-2.39472									PYGL	0.00110281	0.00647611	-2.08586			RPL29	1.82006e-14	3.64435e-13	-2.06106									UPK1B
CD53	6.79454e-78	3.25868e-76	-2.19311									RGS14	2.36584e-05	0.000298096	2.95412	2.95412			NIPAL1	0.00731943	0.0408339	-2.40105									IL18R1	4.14267e-11	5.39651e-10	-2.08714			9530080O11RIK	4.39982e-05	0.000423381	-2.06324									NPM3
P2RY14	1.91723e-64	8.13744e-63	-2.19634									VPS33B	0.00234138	0.0201305	2.94854	2.94854			ANGPTL7	1.4999e-05	0.000154793	-2.40887									GOT2	0.00175059	0.00973922	-2.09071			BMP2K	0.000190925	0.00163841	-2.06769									CNPY3
OAS1A	3.72316e-06	3.94598e-05	-2.19808									DAGLA	0.00385578	0.0310818	2.93523	2.93523			CDR1	0.00839511	0.045638	-2.4127									RP23-106P6.3	7.09637e-12	9.53974e-11	-2.09154			4930528D03RIK	1.28148e-41	4.90901e-40	-2.06775									CES2B
ITGB1	4.65434e-06	4.8777e-05	-2.19887									CDCA7	3.48988e-06	4.709e-05	2.91643	2.91643			ACSL4	5.00096e-05	0.000475406	-2.41413									TNFSF12	0.00699423	0.0323434	-2.09281			GM20125	5.63185e-11	9.49902e-10	-2.06869									SEPW1
ACTR3	2.69076e-06	2.91152e-05	-2.1993									FAM64A	3.19812e-05	0.000396063	2.91468	2.91468			GM21982	7.03735e-56	2.84658e-54	-2.42355									LARP7	5.78015e-06	5.12308e-05	-2.09282			CHST11	4.51315e-06	4.97574e-05	-2.07115									GRINA
PPP1CC	4.83542e-06	5.05371e-05	-2.20462									4932442L08RIK	9.44711e-18	2.1325e-16	2.91293	2.91293			SNHG11	0.00231298	0.0154663	-2.42729									D930048G16RIK	0.0110058	0.0470327	-2.09312			TRAT1	4.24578e-09	6.211e-08	-2.07273									EBP
FERMT3	2.7363e-52	1.03939e-50	-2.20607									1700122E12RIK	0.00156442	0.0141857	2.9103	2.9103			RNF149	7.90712e-10	1.18646e-08	-2.43432									OXCT1	0.000134351	0.000971681	-2.09482			E330020D12RIK	1.37782e-13	2.6559e-12	-2.07485									PLEKHJ1
B3GNT8	4.2353e-09	5.80579e-08	-2.20855									ITIH5	1.44454e-65	7.65945e-64	2.90623	2.90623			ABCB4	0.00531981	0.031169	-2.43703									TXNDC17	1.48468e-10	1.87331e-09	-2.0957			SDF4	1.96883e-34	6.60454e-33	-2.07729									ETV4
CYP1B1	4.67225e-34	1.37588e-32	-2.21025									CRXOS	7.52311e-19	1.77579e-17	2.90518	2.90518			PACS1	0.000399265	0.00320138	-2.4374									ASB3	0.00174211	0.00969799	-2.09622			STXBP2	8.78439e-06	9.35949e-05	-2.08043									HMGA1
SPSB1	0.00070407	0.00511462	-2.21574									GM25791	1.35137e-17	3.04285e-16	2.90041	2.90041			SLC46A3	0.00193813	0.01326	-2.4383									ADORA3	0.00950681	0.0415501	-2.09736			1700020L24RIK	8.89559e-05	0.000814798	-2.08743									ARF6
TUBB6	4.49899e-34	1.32702e-32	-2.22022									TRIM30D	6.08066e-05	0.000731431	2.89774	2.89774			TRAT1	2.76932e-18	5.91171e-17	-2.45794									CLNS1A	0.00667986	0.0310964	-2.09743			KIF23	2.26598e-08	3.09216e-07	-2.09916									PEPD
OLFR558	2.00193e-05	0.000192639	-2.22057									DGKQ	0.0053332	0.0411565	2.89723	2.89723			MEX3A	0.00148361	0.010446	-2.46303									DCXR	4.13534e-09	4.79302e-08	-2.09756			CST7	2.44706e-06	2.79172e-05	-2.09951									GDF15
LGALS9	2.232e-09	3.14305e-08	-2.22062									GM2788	1.19314e-07	1.80983e-06	2.89482	2.89482			DHRS3	4.83062e-23	1.15685e-21	-2.48064									2700094K13RIK	3.12028e-07	3.13606e-06	-2.09795			ZFPM1	0.00910295	0.0481599	-2.10503									GSDMD
RAC2	1.82855e-53	7.06452e-52	-2.22239									SVOP	0.00134928	0.0124408	2.88606	2.88606			GM10134	2.67037e-08	3.61129e-07	-2.48578									PPM1G	4.99464e-07	4.93218e-06	-2.09812			STK24	6.05861e-09	8.75665e-08	-2.10745									TBC1D16
RPS12-PS3	3.61359e-12	5.91824e-11	-2.22275									LARGE	0.00440211	0.034803	2.88295	2.88295			OSBP2	0.000747411	0.005652	-2.48672									PDE3A	2.83443e-06	2.58313e-05	-2.09923			SLC22A5	0.00766144	0.0417249	-2.1108									GM26517
SLC38A11	6.35686e-12	1.02077e-10	-2.22569									OPRM1	0.000316748	0.00334145	2.88073	2.88073			IGFN1	3.46513e-06	3.89875e-05	-2.48783									LSR	1.32821e-15	2.03003e-14	-2.09926			EDDM3B	2.98747e-05	0.000295632	-2.11215									SMIM4
MAP4K1	5.77311e-10	8.41125e-09	-2.22844									AI462493	4.01575e-06	5.40243e-05	2.87437	2.87437			LYPLAL1	0.00151143	0.0106293	-2.49408									SLC26A11	0.000613582	0.00382031	-2.10251			LRRC49	0.000224797	0.00188961	-2.12449									CCDC109B
GM26917	0.00361136	0.0222098	-2.23727									PKD2L1	0.00273358	0.0229568	2.87169	2.87169			ZFP467	4.39829e-19	9.61615e-18	-2.49951									TOR3A	5.96718e-10	7.25085e-09	-2.1034			CD83	0.00384907	0.0232915	-2.1341									GM26647
SERPINB1A	3.47479e-07	4.07178e-06	-2.23739									GM15676	0.00101346	0.00961406	2.87092	2.87092			VILL	4.56436e-15	8.76096e-14	-2.51928									CCL6	1.44407e-19	2.4402e-18	-2.10566			RP24-260I8.2	1.11438e-10	1.83008e-09	-2.16354									OLFR56
DONSON	0.00340266	0.0210409	-2.23869									SLCO1A6	0.000202307	0.00222095	2.86246	2.86246			GNA11	2.24073e-12	3.91824e-11	-2.53683									TRMT6	1.4057e-07	1.45737e-06	-2.10909			CNTNAP2	0.00813183	0.0438246	-2.16453									UHRF1
PDK1	0.00168105	0.0111623	-2.24283									GPR25	3.76278e-06	5.06589e-05	2.8581	2.8581			NTF3	2.6862e-06	3.074e-05	-2.55254									EPOR	1.53351e-43	3.57311e-42	-2.10976			EIF3J2	0.00894494	0.0474849	-2.16654									CKLF
TRABD2B	0.00132354	0.0090579	-2.2454									APLP2	0.00415477	0.0331082	2.84671	2.84671			F930017D23RIK	6.99912e-10	1.05459e-08	-2.55404									MIR142B	1.36778e-80	4.35402e-79	-2.11048			LRRC59	5.68569e-07	6.85446e-06	-2.17477									ZFP207
CDKN3	0.000634856	0.00466429	-2.25249									6330403N20RIK	0.000336033	0.00351813	2.84006	2.84006			ETV5	2.45741e-06	2.8229e-05	-2.55748									BC005624	0.00480189	0.0234214	-2.11149			ATP6AP2	7.51949e-07	8.96834e-06	-2.18027									POLR2C
MYOC	1.72888e-15	3.2836e-14	-2.26412									PAPSS1	0.00015838	0.00178422	2.8363	2.8363			HMOX1	9.30482e-07	1.11936e-05	-2.58136									GM17382	0.000758962	0.00462202	-2.11284			TOMM70A	2.70661e-07	3.37272e-06	-2.18331									RAMP1
GCNT1	0.000487596	0.0036719	-2.26486									SLC16A2	3.16004e-45	1.19283e-43	2.82889	2.82889			MT-ATP6	6.79288e-08	8.85524e-07	-2.58388									PLK2	1.10521e-05	9.36862e-05	-2.11334			PDE8B	5.58856e-33	1.81087e-31	-2.18974									PSMB5
B4GALT2	0.00425269	0.0255374	-2.27416									SLC22A23	0.00395937	0.031747	2.82875	2.82875			PSMC3	1.57692e-66	7.29214e-65	-2.58954									XPO1	9.30063e-05	0.000691467	-2.11674			KLRG1	6.92808e-12	1.22931e-10	-2.19272									PSMB6
MND1	0.0009057	0.00642951	-2.27758									RNF183	3.53232e-81	2.3057e-79	2.82749	2.82749			GM14664	0.00465503	0.0279155	-2.59558									MAST3	0.00807028	0.0365253	-2.11977			PDE5A	3.60149e-07	4.43587e-06	-2.19397									BC107364
GM10116	2.89014e-09	4.02284e-08	-2.28083									RSRP1	3.04798e-11	5.62352e-10	2.82679	2.82679			D330050G23RIK	7.49862e-05	0.000689636	-2.60225									CD93	1.43257e-21	2.52458e-20	-2.12049			GGA2	0.00186144	0.0124183	-2.1975									SCAMP2
LGMN	5.85389e-05	0.00052685	-2.28426									DCPP1	1.48485e-07	2.22617e-06	2.82156	2.82156			1700020N01RIK	4.09903e-15	7.90133e-14	-2.63108									GAB3	0.000674924	0.00416495	-2.12178			KCNH3	9.9184e-18	2.22499e-16	-2.19798									BCAS2
HPRT	5.29564e-12	8.54915e-11	-2.29185									GM26944	0.00066283	0.00654182	2.82126	2.82126			CRIM1	0.000278699	0.00230361	-2.63186									ETV6	0.000163223	0.00116145	-2.12189			HOOK2	0.00477913	0.0281544	-2.20584									CAP2
RELN	0.00524435	0.0305585	-2.29504									ORM2	1.91387e-18	4.43083e-17	2.81424	2.81424			A4GALT	2.36083e-47	8.83773e-46	-2.63375									KHDRBS1	0.00301166	0.0157199	-2.12236			CCDC80	9.77698e-08	1.26995e-06	-2.21221									RPL7L1
EPB4.1	7.48847e-06	7.60241e-05	-2.29772									PLK1	7.91759e-07	1.12193e-05	2.81397	2.81397			HPS6	0.00882039	0.0475213	-2.6458									C1D	0.006307	0.0296354	-2.12258			AOAH	1.65977e-05	0.000169934	-2.21472									PTPRC
SELPLG	3.82017e-33	1.10693e-31	-2.29994									GM15512	0.000804707	0.00781413	2.81167	2.81167			H6PD	5.59201e-06	6.11671e-05	-2.64719									LPAR6	1.84806e-07	1.89857e-06	-2.1291			NQO1	1.05627e-08	1.49439e-07	-2.21708									NFE2L2
PTX3	2.35312e-14	4.2293e-13	-2.30027									IQSEC3	0.00370882	0.0300579	2.80931	2.80931			D10JHU81E	6.27382e-33	1.88747e-31	-2.65737									PTBP3	0.00318749	0.016509	-2.1305			TLR13	6.09718e-23	1.57942e-21	-2.21875									SEC61B
PAX9	7.34619e-15	1.34849e-13	-2.31158									GM12117	0.000168655	0.00188821	2.8059	2.8059			CYSLTR1	0.000241421	0.0020303	-2.66577									RTN4RL1	7.39971e-40	1.65382e-38	-2.13287			PFKP	0.00211408	0.013893	-2.2269									DYNC1LI1
SMIM3	3.41268e-06	3.63396e-05	-2.31365									GM12089	1.5021e-06	2.0908e-05	2.80306	2.80306			CDK15	1.3486e-07	1.72936e-06	-2.67822									TXNIP	9.10728e-06	7.82646e-05	-2.13717			ANGPT2	1.10557e-54	4.82846e-53	-2.2293									THBS3
D630003M21RIK	0.00582102	0.0333597	-2.3287									BCL2A1D	3.63601e-06	4.89887e-05	2.79267	2.79267			GLRB	0.00826181	0.0450216	-2.70471									CXCL2	0.000239773	0.00163598	-2.1374			AQP2	0.000476692	0.00370235	-2.23108									SLAMF8
IGFBP6	1.42074e-12	2.36759e-11	-2.33107									MFAP1A	2.07752e-10	3.71917e-09	2.7887	2.7887			STAP1	1.21426e-23	2.94303e-22	-2.70763									UBL3	0.00042364	0.00273175	-2.13754			SLC25A18	8.47279e-13	1.57166e-11	-2.24559									PSME2B
CACNA2D1	0.00020882	0.00169617	-2.33624									RPL36-PS3	1.79673e-19	4.29149e-18	2.7868	2.7868			AOAH	7.75858e-15	1.47777e-13	-2.71588									DERL2	0.000115591	0.000846497	-2.13853			GM20721	0.000290862	0.00237967	-2.24846									B430306N03RIK
MTUS2	0.00829271	0.0450188	-2.34688									C1RA	0.000924819	0.00887561	2.78659	2.78659			9930012K11RIK	3.03683e-05	0.000300377	-2.73806									PRSS28	0.00148577	0.00845848	-2.13884			4930524B15RIK	3.2477e-11	5.52414e-10	-2.25067									EIF3K
IRAK3	1.64566e-36	5.06041e-35	-2.34943									SP110	1.58342e-47	6.17021e-46	2.78342	2.78342			HS6ST3	1.34171e-15	2.62833e-14	-2.74157									PIK3R5	3.18628e-13	4.52562e-12	-2.13919			BC048546	0.00669558	0.0373766	-2.25842									MTCH2
RRM2	0.00584611	0.0334611	-2.35084									HSP90AB1	8.70908e-66	4.65884e-64	2.78296	2.78296			AQP11	4.34308e-05	0.000417254	-2.75064									BHLHE22	0.000153116	0.00109383	-2.14048			PSRC1	7.23639e-05	0.000673744	-2.26904									LTBP2
MFHAS1	0.00105313	0.00738335	-2.35721									C1QA	5.36891e-05	0.000651512	2.77418	2.77418			SPRY4	0.000589183	0.00457015	-2.7691									GM829	1.91618e-06	1.78222e-05	-2.14071			CXCL2	1.91405e-07	2.42353e-06	-2.27011									GM13448
PON3	2.35576e-40	7.63343e-39	-2.36015									EIF4A1	1.77096e-07	2.63545e-06	2.77237	2.77237			HLF	1.11581e-11	1.87312e-10	-2.77219									RBM17	2.01817e-05	0.000165942	-2.14237			COL6A1	9.11855e-05	0.000833953	-2.27279									MYBPC3
2021-09-06	5.12116e-14	8.98988e-13	-2.3607									OAS1G	3.97683e-21	9.83653e-20	2.76326	2.76326			4833422M21RIK	0.00413079	0.0252157	-2.77759									KIF20B	2.77146e-07	2.80418e-06	-2.14425			TCRG-C1	1.04749e-09	1.61739e-08	-2.27306									ATP6V0B
SERP1	2.64594e-09	3.69716e-08	-2.38497									TSPYL4	0.00587843	0.0448661	2.75749	2.75749			STAMBPL1	0.00328035	0.0209213	-2.77856									CDC20	2.0105e-07	2.05726e-06	-2.14945			SNHG11	0.000884023	0.00644659	-2.28347									FAM110B
CRISPLD1	2.12561e-05	0.000203566	-2.38963									PRIM2	0.00208198	0.0181418	2.75194	2.75194			NOTUM	0.00105615	0.00768462	-2.79787									ADAM33	1.15128e-29	2.27999e-28	-2.15327			2810417H13RIK	4.86881e-21	1.18643e-19	-2.29042									ANK
NFYA	0.00665638	0.0372888	-2.39283									1700065D16RIK	1.38572e-09	2.35925e-08	2.75102	2.75102			PLXNA2	0.00152854	0.0107247	-2.80763									SCARA3	0.000395446	0.00257289	-2.15494			CX3CL1	4.91139e-05	0.00046936	-2.29082									PIGM
BHLHE22	0.000748316	0.00539916	-2.39663									PIP5KL1	7.73399e-09	1.25867e-07	2.75078	2.75078			NUAK1	0.00420739	0.0256055	-2.82832									HAVCR2	0.00155725	0.00881273	-2.15696			ABRA	7.58763e-11	1.2598e-09	-2.30109									NEK6
FAM107B	8.44672e-09	1.13214e-07	-2.40068									CCDC13	9.47777e-17	2.09496e-15	2.74766	2.74766			CHCHD2	1.43431e-17	2.99121e-16	-2.83735									PES1	9.08706e-08	9.59154e-07	-2.15881			GM16046	6.91618e-09	9.91684e-08	-2.30821									GM7361
GJB6	5.9003e-24	1.41302e-22	-2.40677									SUMO2	8.69057e-29	2.49024e-27	2.74583	2.74583			GM4279	5.74363e-15	1.09779e-13	-2.85637									WDR3	0.000560269	0.003515	-2.16112			ID1	6.15961e-18	1.38868e-16	-2.31625									DTX1
ST6GALNAC2	1.60725e-07	1.93223e-06	-2.40739									CD79A	0.000845374	0.00816518	2.73588	2.73588			EFNB2	2.73434e-35	8.53879e-34	-2.88329									GLUD1	0.00583919	0.0276891	-2.16176			CAR8	0.000659977	0.00497833	-2.33814									RTFDC1
CEBPB	8.21434e-13	1.38548e-11	-2.4086									4933427E11RIK	0.000118857	0.00136621	2.73406	2.73406			CISD1	6.82188e-45	2.46201e-43	-2.89686									SAP30	2.8255e-13	4.03499e-12	-2.16342			TUFT1	6.55426e-11	1.09831e-09	-2.35354									G3BP1
TMIGD1	0.000541469	0.0040389	-2.41172									CCR5	6.46714e-26	1.75574e-24	2.73176	2.73176			MEDAG	6.71731e-08	8.76304e-07	-2.93637									MRPL24	0.0111849	0.0476573	-2.16502			ARHGAP11A	4.98423e-38	1.77401e-36	-2.37707									CTAGE5
CD69	0.00270897	0.0171442	-2.42897									HSD11B2	2.3475e-09	3.95944e-08	2.73083	2.73083			FKBP5	1.36676e-16	2.74582e-15	-2.96453									CRLF1	7.89413e-61	2.13994e-59	-2.16792			ATP5L	1.17663e-05	0.000123474	-2.38491									PRKCD
AB124611	1.26321e-12	2.11482e-11	-2.43257									ZFP57	0.000158116	0.00178347	2.72784	2.72784			GM14379	0.00340557	0.0215068	-2.96709									SUGT1	1.58107e-05	0.000131557	-2.16858			PLA2G4A	6.11337e-16	1.29131e-14	-2.39316									MAN1C1
DYNLT1A	4.96963e-59	2.02835e-57	-2.46699									TYRP1	0.00328657	0.0269929	2.71859	2.71859			SOX9	5.17528e-43	1.82762e-41	-2.96931									BB031773	4.32464e-14	6.3469e-13	-2.17191			TSC22D1	1.17896e-06	1.3842e-05	-2.42227									NPAS2
GM8394	0.00444381	0.0265615	-2.47685									BYSL	0.00133942	0.0123625	2.71749	2.71749			FAM83F	3.20164e-32	9.48997e-31	-2.96973									MVP	2.07127e-06	1.91956e-05	-2.17196			NTF3	2.60931e-07	3.25821e-06	-2.42789									AOAH
SLC12A6	0.000392791	0.00301701	-2.48564									NEAT1	7.12103e-11	1.29532e-09	2.71101	2.71101			MTDH	6.61944e-33	1.98814e-31	-2.97692									BLMH	1.11098e-05	9.41317e-05	-2.17418			PAPLN	0.00197469	0.013069	-2.43174									SUV39H2
SLC25A37	0.000131174	0.0011117	-2.48569									4930415O20RIK	0.000946636	0.0090418	2.70378	2.70378			ZSWIM4	0.000109792	0.000988125	-3.00617									SPINT2	1.47206e-199	1.01203e-197	-2.17461			CACNG6	2.06041e-09	3.09183e-08	-2.4364									CFDP1
LY6E	1.55279e-25	3.85658e-24	-2.49247									TSPAN32	6.72223e-05	0.000802275	2.69474	2.69474			VCAN	4.59667e-09	6.55978e-08	-3.02562									RAMP1	3.8332e-57	1.00592e-55	-2.17642			FAM83F	1.34585e-22	3.45657e-21	-2.44397									ACTR10
FAM105A	4.84679e-38	1.52144e-36	-2.49421									GM24888	0.000165046	0.00185239	2.6939	2.6939			HELB	0.00425395	0.0258367	-3.02929									EIF2A	7.60214e-05	0.000572487	-2.17831			CENPA	0.000700575	0.00524952	-2.45497									MPP1
NBL1	6.8669e-06	7.00262e-05	-2.5067									GJB1	0.000704673	0.00693587	2.69249	2.69249			RASSF3	1.2723e-08	1.76144e-07	-3.06327									CES2G	0.00676304	0.0314513	-2.18056			PPIB	3.87458e-41	1.47487e-39	-2.46865									FAM32A
BLNK	7.06286e-28	1.85616e-26	-2.51775									GM27194	7.12628e-05	0.000847142	2.6898	2.6898			CNTROB	0.00155865	0.0108979	-3.07477									UAP1L1	0.000247397	0.00168102	-2.18284			RAP1A	1.23019e-23	3.28068e-22	-2.48548									CCT8
ARHGAP15	1.08108e-13	1.87952e-12	-2.52819									C2CD2L	0.00546081	0.0420779	2.66634	2.66634			CYP2U1	0.00267725	0.0175643	-3.10464									QARS	6.66626e-07	6.49771e-06	-2.18474			6430562O15RIK	0.000796546	0.00587371	-2.50646									BSCL2
HES5	0.000993041	0.00699461	-2.53029									CD5	1.12998e-11	2.11721e-10	2.66593	2.66593			2021-03-03	0.000221331	0.00187794	-3.12377									POMP	5.12068e-07	5.04709e-06	-2.18715			GRIFIN	2.05681e-05	0.000207993	-2.50862									GM20506
KCTD12	1.69435e-05	0.000164796	-2.53608									FAM134B	9.94885e-40	3.39406e-38	2.66448	2.66448			KCTD4	0.00221307	0.0148698	-3.14512									NPM1	0.000312112	0.00207703	-2.19036			ZFP536	4.50266e-32	1.44862e-30	-2.51729									MLLT4
TNNI1	1.34013e-05	0.000131689	-2.53644									E2F7	0.00125571	0.0116853	2.6616	2.6616			IFI204	3.22916e-08	4.33455e-07	-3.14554									FILIP1L	0.00152976	0.00867618	-2.19051			NEK6	0.00215803	0.0141291	-2.55581									HNRNPA2B1
PI16	5.04654e-14	8.8675e-13	-2.54748									CLCF1	1.3281e-05	0.000170792	2.65912	2.65912			GJB2	1.58466e-06	1.86538e-05	-3.36823									NOP58	2.43659e-06	2.23976e-05	-2.19077			TMEM35	2.99901e-05	0.000296474	-2.56499									GLRX
ADAMTS1	3.36994e-15	6.3273e-14	-2.54847									ARHGAP30	8.02848e-06	0.000106113	2.65597	2.65597			RPS28	0.000397486	0.00319049	-3.37537									CAR14	5.98406e-09	6.86099e-08	-2.19127			ITGAX	1.15805e-25	3.20654e-24	-2.56914									FANCL
XBP1	3.6339e-10	5.35489e-09	-2.55196									ZFP850	0.00196657	0.0172547	2.65371	2.65371			EPHB1	0.000770507	0.00580964	-3.46155									CLPTM1	1.24979e-06	1.18435e-05	-2.19209			MIER2	0.00298556	0.018666	-2.57762									BLVRB
TBC1D9	0.00076497	0.00551272	-2.55607									KLF13	6.85931e-75	4.0137e-73	2.65137	2.65137			PCDH10	8.35352e-62	3.71106e-60	-3.47831									HMGN1	0.000319839	0.00212454	-2.19327			SLC6A11	8.77733e-09	1.24766e-07	-2.60136									TRAF6
PRICKLE1	1.33829e-07	1.61857e-06	-2.56674									CDH6	0.00142567	0.0130785	2.64041	2.64041			GM5611	0.0010482	0.00763737	-3.49502									ABHD3	7.7761e-92	2.67809e-90	-2.19585			RGS1	3.58128e-08	4.82872e-07	-2.6082									RARS
NCAPG2	0.00532845	0.0309687	-2.56925									ABHD14A	4.90981e-18	1.1223e-16	2.61761	2.61761			ETV4	2.18718e-06	2.52854e-05	-3.51976									CAR2	3.54464e-35	7.43512e-34	-2.19651			AQP11	8.55274e-08	1.11655e-06	-2.61009									FKTN
ADRB2	0.00667836	0.0373959	-2.57959									SLC41A2	0.00118747	0.0111017	2.61028	2.61028			BMP2K	1.14165e-10	1.8155e-09	-3.5914									NOL7	0.00235358	0.0126524	-2.19786			PDE6B	5.95141e-05	0.000562507	-2.61629									RAB7
LGALS3	7.49203e-07	8.45062e-06	-2.58351									ACTG2	8.0925e-05	0.000953228	2.60811	2.60811			ADSSL1	7.06249e-11	1.13508e-09	-3.63126									ARHGDIB	2.41323e-05	0.00019646	-2.19801			SERPINI1	5.48264e-29	1.65219e-27	-2.63546									PPP2R5C
CXCL12	8.47596e-31	2.33619e-29	-2.59062									LRRC75A	0.000206408	0.00225912	2.60241	2.60241			HPCA	2.49682e-08	3.38672e-07	-3.76353									DAGLB	4.05998e-11	5.30025e-10	-2.19862			TRPM2	4.64526e-22	1.17634e-20	-2.64453									HDAC1
HK2	7.33179e-86	3.74481e-84	-2.61999									GAS1	0.000204693	0.00224306	2.59605	2.59605			ZFP384	0.000138696	0.00122629	-3.96567									CCDC115	8.04165e-11	1.03194e-09	-2.20074			CXX1C	0.0011351	0.00802567	-2.65559									GM13977
NFATC4	5.62849e-05	0.000507828	-2.62839									SYCE2	0.0033806	0.0276327	2.59029	2.59029			ST13	0.000334051	0.00271581	-4.99454									CD300LF	3.07484e-18	5.04603e-17	-2.20588			D730045B01RIK	0.00100659	0.00720796	-2.6887									2010320O07RIK
LPCAT2	1.20282e-07	1.46256e-06	-2.64899									ADAMTS20	0.00324193	0.0266806	2.58982	2.58982			ALOX5	4.18326e-41	1.46301e-39	-5.51054									EVL	4.22406e-12	5.72957e-11	-2.20662			LTBP2	5.68646e-07	6.85446e-06	-2.68938									GLUD1
HLX	6.84365e-22	1.54869e-20	-2.6514									CD209F	0.00402059	0.0321665	2.58115	2.58115			GIMAP8	0.00325514	0.0208488	-6.14807									SPEER4C	0.00545318	0.0261328	-2.20816			CYP46A1	0.00193622	0.0128472	-2.71066									TMEM176A
FBXO32	3.95438e-06	4.17147e-05	-2.65186									GPR34	2.19853e-23	5.71143e-22	2.57352	2.57352			ASB18	1.38231e-13	2.54257e-12	-9.29028									PREB	1.21188e-06	1.15265e-05	-2.20819			ELN	1.30327e-63	6.26716e-62	-2.7352									CHMP2A
IER3	3.86331e-10	5.68369e-09	-2.68565									SERPINH1	2.12263e-35	6.7332e-34	2.57198	2.57198			UBE2E3	1.39729e-19	3.08479e-18	-11.2121									GM13977	1.00743e-05	8.60029e-05	-2.20898			D630024D03RIK	0.000906688	0.00658386	-2.74681									CSK
RAPGEF5	0.00931741	0.0495495	-2.6961									B430319H21RIK	0.000811862	0.00787938	2.56886	2.56886															UNG	9.96075e-08	1.04831e-06	-2.20924			EFNB2	9.4222e-39	3.38693e-37	-2.78028									PLCL1
DAP	1.67767e-12	2.78805e-11	-2.71098									SLC27A2	0.00392129	0.0315536	2.56844	2.56844															CNPY3	0.00017995	0.00126701	-2.212			TREML4	5.37476e-07	6.49606e-06	-2.79388									RNPEP
SPP1	6.72335e-23	1.57061e-21	-2.716									UBB	2.76837e-19	6.58616e-18	2.56784	2.56784															HMGA1	0.000414094	0.00267783	-2.21308			AQP3	0.00387414	0.0234009	-2.87498									CCL6
NOV	0.00387082	0.0235492	-2.72898									GM28043	1.58166e-06	2.19985e-05	2.56579	2.56579															ALKBH2	2.79156e-05	0.000224629	-2.21949			VCAN	8.2003e-10	1.27599e-08	-2.88164									ALOX5
EFCAB4A	3.95324e-12	6.42793e-11	-2.74673									GM6117	1.78962e-18	4.1538e-17	2.56551	2.56551															NDUFV2	7.67503e-06	6.67495e-05	-2.22229			NUPR1L	0.00378302	0.0229379	-2.95794									1700023F06RIK
MSN	4.80615e-14	8.46155e-13	-2.74746									MKL2	0.000286318	0.00304704	2.56396	2.56396															MKRN1	4.68003e-05	0.000364827	-2.22231			NRXN2	1.33963e-11	2.3335e-10	-2.96728									HAUS3
HOXD9	0.00303972	0.0190375	-2.7475									GM24305	0.0016761	0.0150782	2.5607	2.5607															EPSTI1	6.95096e-05	0.00052652	-2.22278			RPS28	1.25978e-11	2.20078e-10	-3.00266									GNA11
PDE3A	7.87214e-08	9.72906e-07	-2.76813									SLC12A5	8.67075e-09	1.40606e-07	2.55773	2.55773															HAGHL	2.3502e-18	3.86661e-17	-2.22421			ENAH	0.000113152	0.00102193	-3.04222									HPS4
AU021092	3.56301e-14	6.31596e-13	-2.79209									GM17130	5.71595e-06	7.62169e-05	2.55281	2.55281															UBTD1	2.6417e-11	3.48138e-10	-2.22563			CSPG4	0.000158493	0.0013891	-3.04911									9330162012RIK
ABCC9	4.07282e-08	5.17502e-07	-2.79899									SMUG1	0.000605875	0.00601583	2.55096	2.55096															SUSD5	1.93864e-12	2.67373e-11	-2.22891			KIFC1	9.23857e-08	1.20261e-06	-3.05227									SNX6
CDKN2B	1.23556e-19	2.65955e-18	-2.80685									BAG5	0.00182563	0.0161889	2.54926	2.54926															F930017D23RIK	1.9822e-12	2.72756e-11	-2.2316			CDC20	0.000235949	0.00197326	-3.19424									2610528A11RIK
DPEP1	1.34584e-14	2.43586e-13	-2.81078									CELSR2	1.86958e-36	6.07982e-35	2.54906	2.54906															ATG3	0.000573221	0.0035863	-2.23171			ETV4	2.65041e-27	7.65528e-26	-3.27564									GRB2
LAMC3	6.06618e-05	0.000544871	-2.84402									GM21762	1.4443e-16	3.16537e-15	2.54658	2.54658															ADRM1	0.00121341	0.00707502	-2.23473			MEDAG	6.92468e-11	1.15397e-09	-3.33571									RINL
IGFBP7	5.61248e-06	5.8121e-05	-2.8479									LAPTM4A	1.48168e-19	3.54839e-18	2.54051	2.54051															IFI27L2A	6.9411e-06	6.08938e-05	-2.23611			GSG1L	2.80682e-05	0.000278847	-3.37147									HOTAIRM1
S100A11	5.06395e-10	7.40188e-09	-2.85501									RP23-13A15.5	1.23896e-07	1.87106e-06	2.54042	2.54042															ACTR10	5.87406e-05	0.00045061	-2.23681			ALOX5	1.4663e-22	3.76059e-21	-3.39286									FBXO44
LYZ2	4.50662e-06	4.7292e-05	-2.86887									PPP1R3F	4.74453e-11	8.66523e-10	2.52953	2.52953															OLFML3	2.73668e-05	0.000220606	-2.2393			MT-ATP6	1.33519e-11	2.32802e-10	-3.40694									ABHD3
GM26853	0.00678404	0.0378938	-2.88028									SMIM5	8.45124e-42	3.00801e-40	2.51683	2.51683															ST13	1.07865e-28	2.11991e-27	-2.23939			NEFM	0.0019863	0.0131266	-3.58117									CASR
GRWD1	2.47547e-05	0.000235326	-2.88503									ATP6V1G1	2.7653e-29	8.01273e-28	2.51571	2.51571															CALM3	0.000524698	0.00332064	-2.2396			EFNA5	4.47149e-68	2.27744e-66	-5.58975									PCBP2
CTSC	4.52067e-15	8.40065e-14	-2.89744									SOX30	4.20173e-05	0.000515061	2.51487	2.51487															RPL7	9.79454e-05	0.0007258	-2.23968			C2CD4B	2.7814e-12	5.03409e-11	-5.91433									SARM1
SP100	2.82422e-22	6.45572e-21	-2.9109									GM20675	1.0695e-13	2.16305e-12	2.5123	2.5123															MT-ATP6	0.00826148	0.0372044	-2.24172															FXYD3
CGNL1	6.10456e-32	1.72194e-30	-2.92214									MGAT4A	0.000233638	0.00252656	2.50393	2.50393															TAF10	5.7898e-07	5.68325e-06	-2.24525															IGBP1
NTPCR	2.44554e-14	4.38233e-13	-2.92338									PIK3CD	2.88148e-26	7.91794e-25	2.4996	2.4996															TMEM109	0.00194451	0.0107093	-2.24549															GM11627
ACVRL1	1.36318e-05	0.000133665	-3.02311									MAPK13	0.00218775	0.0189811	2.48707	2.48707															POU3F1	0.00627925	0.0295203	-2.2455															ADRBK1
S100A8	1.112e-19	2.39929e-18	-3.0272									CAPN5	1.45509e-80	9.39558e-79	2.47773	2.47773															ACO2	0.00261109	0.0138449	-2.25276															COMMD8
FHL2	3.25852e-41	1.06541e-39	-3.03766									VWA1	7.57435e-28	2.14322e-26	2.47462	2.47462															ACAT1	0.0111718	0.0476185	-2.25309															GM26903
B4GALNT1	1.7877e-43	6.09877e-42	-3.06069									UBL4	0.00247228	0.021026	2.47167	2.47167															SAV1	4.42852e-08	4.76619e-07	-2.2554															EIF3D
CYBA	3.08667e-15	5.80147e-14	-3.10736									TMBIM4	1.83476e-101	1.32697e-99	2.45721	2.45721															NDUFV1	0.000160512	0.00114351	-2.25819															DNAJA2
GM13139	0.00016452	0.00136579	-3.10968									IL1RL1	0.000278484	0.00297066	2.4511	2.4511															DDX39B	0.00374253	0.0189867	-2.2593															PYROXD1
NT5DC2	2.1303e-10	3.15721e-09	-3.11118									SLC7A2	0.00147409	0.0134658	2.45045	2.45045															ENTPD7	0.000148748	0.00106684	-2.26189															TTL
EPB4.1L1	9.46775e-06	9.49453e-05	-3.19204									STAC2	0.000515027	0.00516771	2.44782	2.44782															PPP2R1A	0.000178791	0.00126121	-2.26259															CST7
TMEM119	3.71029e-10	5.46301e-09	-3.2068									NUP214	0.00260169	0.0219819	2.4446	2.4446															FGF7	4.7615e-24	8.76707e-23	-2.26287															KNG2
APOD	0.0067665	0.0378192	-3.22376									POMGNT2	0.000161501	0.00181712	2.44352	2.44352															HNRNPM	0.000576082	0.00360171	-2.26561															FKBP5
CAMK1D	1.06137e-11	1.67604e-10	-3.27429									ATP1B1	2.04311e-12	3.98076e-11	2.44197	2.44197															HERPUD1	0.000229273	0.00157803	-2.26906															SRP68
MYO1B	5.5724e-40	1.79919e-38	-3.27456									CTSF	2.57276e-11	4.75644e-10	2.44118	2.44118															PSMD14	2.40375e-05	0.000195864	-2.26924															KPNA4
GMIP	5.02809e-10	7.35541e-09	-3.29654									GM14487	4.14458e-09	6.88769e-08	2.43794	2.43794															RAB8A	3.6649e-06	3.31491e-05	-2.27577															MTCH1
FXYD5	6.23168e-37	1.92937e-35	-3.33256									TEP1	0.00074789	0.00731387	2.43624	2.43624															HFE	4.69855e-10	5.75573e-09	-2.27644															CHST2
DAB2	1.01964e-77	4.86439e-76	-3.33896									ABRA	1.09093e-18	2.55837e-17	2.43526	2.43526															PRKCD	1.86963e-07	1.91963e-06	-2.27935															STT3A
TSPYL3	0.000540139	0.00403465	-3.40133									TRAPPC2	5.43867e-19	1.28713e-17	2.43129	2.43129															PAPSS2	1.02167e-05	8.70948e-05	-2.29339															SH3YL1
CAMP	1.77199e-12	2.94209e-11	-3.42235									PDIA3	4.53004e-09	7.5007e-08	2.43115	2.43115															CLDN1	0.000617529	0.00384164	-2.29526															CSRNP1
IL2RG	3.83609e-20	8.39713e-19	-3.46703									PVRL4	0.00306009	0.025334	2.43096	2.43096															PSMA7	0.000712828	0.00436903	-2.29727															PSMB1
GM10073	9.41935e-13	1.58577e-11	-3.47065									RARRES1	0.00320714	0.0264183	2.43065	2.43065															MATK	1.30763e-12	1.81592e-11	-2.29835															ERGIC3
FUCA2	1.42062e-14	2.56862e-13	-3.65285									CCDC36	0.000638567	0.00631615	2.42231	2.42231															ARRB2	0.000780008	0.00473743	-2.29946															DBNL
POU2F2	9.99876e-23	2.32674e-21	-4.02397									ANXA5	3.12617e-12	6.03248e-11	2.4202	2.4202															IK	8.51054e-06	7.34857e-05	-2.29957															LACTB
CH25H	3.74566e-54	1.46592e-52	-4.30289									CRYGA	0.000289552	0.00307964	2.41854	2.41854															CSF2RA	7.585e-07	7.33393e-06	-2.30252															PPP1R14D
ZFP407	0.000735193	0.00531721	-4.42092									CCR8	1.7781e-08	2.8426e-07	2.40834	2.40834															POLH	0.000538334	0.00339269	-2.30431															KCNV1
MEOX2	9.44363e-09	1.26201e-07	-4.94619									ALDH2	9.25831e-36	2.97335e-34	2.40196	2.40196															CTSD	0.00128721	0.0074453	-2.3057															ADRB2
2900026A02RIK	2.91037e-05	0.000274218	-5.49749									LILRA5	1.24047e-20	3.02277e-19	2.39885	2.39885															RASGRP3	8.44823e-23	1.51992e-21	-2.30735															ACTL9
												MARCKSL1	6.12061e-53	2.67311e-51	2.3971	2.3971															PNRC1	0.000181853	0.00127891	-2.30787															GM13571
												SNAI1	0.000196139	0.0021598	2.39511	2.39511															HDAC1	0.00177761	0.00987132	-2.30903															CAR14
												LALBA	1.71546e-05	0.000218432	2.3947	2.3947															SERPINB7	1.91005e-07	1.95891e-06	-2.30981															TKTL1
												SNCA	0.00472044	0.0369962	2.39254	2.39254															PLCL1	7.41518e-10	8.97415e-09	-2.30989															DEGS2
												MEX3A	0.000979947	0.00932058	2.39207	2.39207															RPL27-PS3	5.19716e-07	5.11818e-06	-2.31264															IMPDH2
												ITIH3	1.24924e-05	0.000160879	2.38741	2.38741															PSMB6	0.000177168	0.00125278	-2.31331															PSMA2
												5430427O19RIK	0.0019643	0.0172494	2.38147	2.38147															PLXNA4OS1	9.54698e-08	1.00652e-06	-2.31524															TMEM261
												CPLX2	0.00337614	0.0276092	2.37528	2.37528															ATF4	0.00903834	0.0399175	-2.31539															CD36
												RP23-307A6.1	1.01238e-06	1.4234e-05	2.3719	2.3719															PSMD13	0.00999471	0.0433784	-2.31689															KXD1
												ASRGL1	4.9898e-46	1.91551e-44	2.36804	2.36804															UBE2C	6.72702e-09	7.66423e-08	-2.31773															LAPTM4B
												RP23-204C16.3	1.97378e-09	3.33532e-08	2.36711	2.36711															RP24-447G12.2	7.1209e-20	1.21465e-18	-2.32063															ATP8B5
												GM20069	8.59315e-06	0.000112671	2.36667	2.36667															FZD2	6.38972e-37	1.37703e-35	-2.32091															GM19705
												KLRC1	7.01529e-09	1.14376e-07	2.36439	2.36439															TRAP1	2.18447e-08	2.40106e-07	-2.32334															CDKN3
												KDF1	6.20984e-10	1.08066e-08	2.36348	2.36348															PSMA3	0.000193143	0.00135043	-2.32525															FXN
												TNP2	3.24847e-16	7.0511e-15	2.36328	2.36328															LRFN2	6.32439e-07	6.17782e-06	-2.3284															VILL
												TNFAIP8L1	0.00248928	0.0211011	2.35945	2.35945															RENBP	0.000819469	0.00495214	-2.32932															PAPLN
												GPR174	3.15926e-08	4.95426e-07	2.35801	2.35801															SMARCB1	0.000300146	0.00200626	-2.33298															RPS6KA4
												LAX1	1.43538e-12	2.80575e-11	2.35126	2.35126															NFE2L2	3.00613e-05	0.00024093	-2.33421															UFC1
												RASL11B	1.27458e-28	3.63497e-27	2.34374	2.34374															YIPF3	0.00358092	0.0182539	-2.33515															ACAA1A
												CD160	5.25236e-06	7.01907e-05	2.34324	2.34324															PSMD4	3.2571e-19	5.46304e-18	-2.33686															IDH2
												AMBP	7.56425e-42	2.70295e-40	2.34313	2.34313															CHRAC1	5.84745e-05	0.00044876	-2.33958															NUS1
												GM16596	0.00162891	0.0146968	2.34171	2.34171															ARMCX5	0.0017537	0.00974753	-2.34414															SDHD
												PRKCQ	0.00187293	0.0165596	2.3414	2.3414															CNTROB	0.000617645	0.00384164	-2.34709															SUSD5
												PLLP	3.38939e-14	6.90907e-13	2.33362	2.33362															EIF3K	7.0941e-07	6.88504e-06	-2.34726															ABHD14A
												H2-OA	8.34158e-13	1.64297e-11	2.32235	2.32235															RRP1	0.000511439	0.00324468	-2.34742															MCM6
												LY6I	0.000570387	0.00567906	2.32131	2.32131															CFDP1	0.00334627	0.0171691	-2.3496															FAM83F
												GM13212	0.00485513	0.0378549	2.31965	2.31965															SCPEP1	1.04505e-08	1.1773e-07	-2.35167															NUCB1
												ZFP651	3.38641e-05	0.000418522	2.31435	2.31435															PSMC6	5.09443e-05	0.000395163	-2.35168															IFI27L2A
												CD163	6.17652e-42	2.21144e-40	2.31063	2.31063															PADI3	4.99446e-09	5.76292e-08	-2.35206															STK32C
												ACTN1	2.3768e-15	5.05588e-14	2.30353	2.30353															SKAP2	2.49104e-05	0.00020252	-2.35518															DCTN2
												GM12940	0.00132009	0.012209	2.29807	2.29807															SCAMP2	0.00036214	0.00237327	-2.35923															CCT2
												C1QTNF2	1.68905e-05	0.00021522	2.29761	2.29761															KRT12	8.21099e-14	1.19247e-12	-2.3602															EWSR1
												CD81	9.6374e-28	2.72272e-26	2.29595	2.29595															GRB2	1.69056e-05	0.000140345	-2.36183															TLDC2
												ITPR2	1.94532e-15	4.1478e-14	2.29241	2.29241															FBL	2.07465e-06	1.92171e-05	-2.36207															TRAPPC1
												ARHGAP31	1.97695e-09	3.33755e-08	2.29224	2.29224															BC107364	1.90799e-06	1.77552e-05	-2.36227															CALM3
												NANOS1	8.25172e-05	0.000969456	2.29089	2.29089															ADAMTS2	3.66565e-07	3.6696e-06	-2.36251															VDAC2
												SH3GL3	3.32977e-10	5.88519e-09	2.28986	2.28986															TPD52L2	0.00132817	0.00764557	-2.36373															RALGPS2
												GM16984	1.4544e-19	3.49693e-18	2.28726	2.28726															TBRG1	5.79995e-05	0.000445681	-2.36432															GM10175
												RAB14	2.41167e-39	8.18113e-38	2.26682	2.26682															HEXA	0.00222736	0.0120578	-2.36477															SNX2
												RNF219	0.00109828	0.0103427	2.26669	2.26669															HIST3H2BA	0.00706935	0.0326407	-2.37242															COPE
												2810008D09RIK	3.38186e-33	1.03115e-31	2.26511	2.26511															ZFP324	0.00271313	0.0143413	-2.3803															RAB33A
												LZTS2	1.52857e-18	3.56621e-17	2.2612	2.2612															SERPINB6A	0.0101923	0.0441936	-2.38288															2021-09-11
												LAPTM4B	5.27655e-26	1.43467e-24	2.25696	2.25696															IDH3B	0.00348414	0.0178208	-2.38325															MDH1
												DRAM1	0.000130019	0.00148133	2.25333	2.25333															MBD3	0.0019102	0.0105332	-2.38325															BRK1
												STRA8	0.00449712	0.0354611	2.24698	2.24698															RHOBTB1	7.57489e-10	9.14908e-09	-2.38498															SLCO5A1
												CSRP2	5.96321e-09	9.77523e-08	2.24332	2.24332															CENPA	7.25992e-15	1.09116e-13	-2.38709															GM10825
												TRIM69	0.00040848	0.00420599	2.243	2.243															GM22299	0.0092356	0.0406299	-2.38962															GLRX3
												IL10RA	4.9887e-25	1.33039e-23	2.24261	2.24261															TMEM140	0.007586	0.0346195	-2.39807															9130011E15RIK
												GM3331	4.0786e-12	7.77903e-11	2.24207	2.24207															DDX26B	0.000989069	0.00586339	-2.39979															HMOX2
												GLO1	9.05491e-65	4.71821e-63	2.24026	2.24026															PSMB10	0.00926691	0.0407478	-2.40581															SERBP1
												AHCY	0.000633126	0.00626919	2.21781	2.21781															WDR1	0.00169892	0.00948968	-2.40752															GPR31B
												RXRG	3.71406e-26	1.01594e-24	2.20731	2.20731															EFNA5	3.61787e-10	4.44998e-09	-2.40982															CD300LF
												MCAM	0.000132604	0.00150794	2.20372	2.20372															SIN3B	0.00251665	0.0133913	-2.41197															SLC25A11
												ACADM	2.86567e-40	9.86938e-39	2.19817	2.19817															HNRNPA2B1	3.35607e-06	3.04319e-05	-2.41249															COPZ1
												5430421N21RIK	2.21196e-05	0.00027929	2.19441	2.19441															AIRN	0.0011474	0.00672922	-2.41451															RPL29
												FHL1	3.22875e-23	8.31611e-22	2.19171	2.19171															KLF6	0.00181299	0.0100554	-2.41668															A330048O09RIK
												BC028528	0.00518355	0.0401214	2.18765	2.18765															ADPRH	9.20682e-05	0.000684774	-2.418															TCP1
												CORO2A	0.000555806	0.00556144	2.18608	2.18608															IER5	1.09757e-09	1.31078e-08	-2.42503															FAM96A
												TUBA1A	3.823e-74	2.2155e-72	2.18358	2.18358															KXD1	0.00598592	0.0282965	-2.42503															3300002I08RIK
												MYO1C	0.00049996	0.00503608	2.18249	2.18249															EWSR1	0.00428396	0.0212915	-2.42513															4930512H18RIK
												GM15976	3.79933e-18	8.75105e-17	2.18052	2.18052															SASH3	2.34042e-05	0.000190876	-2.43158															TRIM58
												SMPD2	1.08566e-23	2.84077e-22	2.18007	2.18007															CHMP2A	0.000163866	0.00116556	-2.43384															PCX
												BAIAP2	2.09968e-06	2.89805e-05	2.17738	2.17738															ATXN10	0.000138872	0.00100157	-2.43431															EFNA5
												NUDT7	4.86175e-64	2.51158e-62	2.17592	2.17592															GM13448	1.041e-05	8.86172e-05	-2.43498															CYB5R4
												CH25H	0.00394544	0.0317197	2.17507	2.17507															NOS1AP	1.375e-12	1.90509e-11	-2.43779															POLR3GL
												BCAS1	4.46854e-09	7.40566e-08	2.17117	2.17117															GM11627	0.000376684	0.00246145	-2.43846															2700060E02RIK
												ATRAID	0.000739558	0.00724375	2.16867	2.16867															ASNA1	0.000612447	0.00381455	-2.44386															RGS16
												HPGD	8.14936e-05	0.0009593	2.16515	2.16515															RSRP1	1.14731e-46	2.77334e-45	-2.45252															ATP5A1
												GM21982	5.37777e-07	7.76021e-06	2.16013	2.16013															NECAP2	0.00285298	0.0149983	-2.45364															AHSA1
												GM12708	0.0017664	0.0157472	2.13944	2.13944															TNFAIP8	3.7617e-07	3.75775e-06	-2.45454															PHB2
												VIPR1	0.00230097	0.0198303	2.13627	2.13627															ZFP493	0.00324012	0.0167385	-2.45774															SNX5
												CCAR2	0.00269331	0.0226501	2.13444	2.13444															STXBP2	9.00546e-19	1.49246e-17	-2.45937															TMEM14C
												TOMM22	1.30789e-19	3.14887e-18	2.13226	2.13226															WNT10A	0.00354266	0.0180713	-2.45961															PCBP4
												SNX1	2.22277e-07	3.29696e-06	2.12902	2.12902															ZPBP	0.00296621	0.015514	-2.46679															C630043F03RIK
												5430435G22RIK	0.000209423	0.00228796	2.129	2.129															SNX17	0.00547614	0.026218	-2.46902															TRAT1
												GM16853	1.14179e-19	2.75998e-18	2.12595	2.12595															CCT2	9.73316e-05	0.000721843	-2.47481															VAULTRC5
												GM26851	1.05901e-11	1.98836e-10	2.10987	2.10987															ATRAID	1.2321e-27	2.3903e-26	-2.47809															GRAP
												RNF7	1.27918e-47	5.00626e-46	2.10949	2.10949															TNFAIP3	3.07278e-05	0.000246112	-2.47898															ADAT2
												GATAD2A	0.00346674	0.028299	2.10701	2.10701															PSMD2	1.57407e-05	0.000131154	-2.48167															SNORA2B
												BC035044	2.83724e-15	6.01408e-14	2.10403	2.10403															ACAA1A	0.00852176	0.0380919	-2.48406															NETO1
												SLCO2B1	0.000134017	0.00152209	2.10329	2.10329															SELL	1.36295e-12	1.88984e-11	-2.49051															DIO3OS
												LAMTOR1	0.00227246	0.0196126	2.10315	2.10315															THSD7A	0.00938932	0.0411559	-2.49177															PFKFB3
												GM4279	3.68703e-10	6.47864e-09	2.10246	2.10246															CR1L	1.69797e-08	1.88234e-07	-2.49372															ATP6V0D1
												KLRA17	2.00134e-14	4.1074e-13	2.0945	2.0945															NUCB1	0.00610051	0.0287623	-2.49517															NECAP2
												GM26916	0.00280744	0.0235115	2.08923	2.08923															NONO	3.84202e-05	0.000303219	-2.49935															TPI1
												INSC	3.18325e-06	4.32755e-05	2.08338	2.08338															HPCA	2.157e-17	3.46673e-16	-2.4998															BAG1
												GAMT	4.06567e-34	1.25876e-32	2.08036	2.08036															0610031J06RIK	0.00838689	0.0376567	-2.50082															ARF1
												CASC5	0.00151802	0.0138274	2.08	2.08															COPE	0.00650349	0.0304459	-2.50341															F630028O10RIK
												RPRML	0.00462636	0.0363534	2.07749	2.07749															ATP6V1E1	0.00354309	0.0180713	-2.50777															PLA2G4A
												BPGM	3.5642e-40	1.22053e-38	2.0749	2.0749															MFAP5	0.0024035	0.0128764	-2.52307															RP24-496C19.2
												ARHGAP15	2.5996e-12	5.03787e-11	2.07468	2.07468															RPS6KA4	0.00305874	0.0159381	-2.52491															EIF3F
												GBP8	3.1454e-11	5.79356e-10	2.06164	2.06164															EMG1	0.00231484	0.0124716	-2.52838															EEF1D
												AHNAK2	2.94384e-05	0.000366833	2.05921	2.05921															PCBP2	8.84822e-05	0.000660547	-2.53331															CD68
												PTGFR	1.57339e-16	3.43997e-15	2.04326	2.04326															PA2G4	0.000529115	0.00334625	-2.53902															PPP1CA
												BC028777	5.83829e-05	0.000704687	2.03425	2.03425															BUB3	0.000262366	0.00177472	-2.54635															GM27200
												PRUNE2	5.06002e-37	1.66044e-35	2.03059	2.03059															COL6A2	5.63168e-10	6.85238e-09	-2.54722															B230307C23RIK
												EMB	1.36216e-63	6.97712e-62	2.01798	2.01798															DEK	0.00024143	0.00164542	-2.54751															RPS28
												GM9733	4.28101e-06	5.75073e-05	2.01741	2.01741															9530080O11RIK	0.0044373	0.0218971	-2.54871															VPS35
												CKS1B	7.84366e-05	0.00092633	2.01583	2.01583															SPNS2	0.00236156	0.0126873	-2.5635															CD53
												D10JHU81E	8.71753e-15	1.81383e-13	2.01582	2.01582															CKS2	1.86877e-05	0.000154359	-2.56371															CAMK1
												POSTN	0.00190233	0.0167622	2.01453	2.01453															PLA2G4A	1.98202e-14	2.93505e-13	-2.56577															YWHAH
												PPIB	1.08088e-09	1.85421e-08	2.00127	2.00127															IDH3G	0.000776959	0.00472049	-2.56613															HFE
												MANSC4	0.00483255	0.0377277	2.0012	2.0012															SERPINA3G	1.14134e-24	2.11439e-23	-2.5662															KDELR1
												SNX8	0.000383401	0.00397037	0.499811	-2.00076															E230013L22RIK	0.0105001	0.0452753	-2.56933															AP2M1
												8030423F21RIK	2.19365e-31	6.55594e-30	0.499347	-2.00262															HMOX1	0.000129178	0.00093689	-2.57035															RP23-395C1.4
												MPP1	0.000128656	0.00146766	0.499344	-2.00263															GM16062	0.011375	0.0482908	-2.57278															GM20498
												MED9	0.0036139	0.0293544	0.497474	-2.01015															1700020N01RIK	1.95643e-07	2.00534e-06	-2.58025															ARHGDIA
												NSL1	0.00225992	0.0195378	0.497218	-2.01119															ELOVL2	1.33647e-57	3.51232e-56	-2.58026															AKR1A1
												UHRF1	2.13175e-16	4.63271e-15	0.496194	-2.01534															EDDM3B	2.42485e-05	0.000197227	-2.58457															HEXB
												RCBTB2	0.0032562	0.0267859	0.494973	-2.02031															1700086P04RIK	0.00175266	0.00974753	-2.60085															SLC26A11
												NRAS	0.00431423	0.034228	0.494122	-2.02379															COPZ1	0.00038302	0.00249923	-2.60377															MESDC1
												OSBPL9	0.00340416	0.0278006	0.493899	-2.02471															COMMD8	0.000413163	0.00267277	-2.60463															MCTP1
												PLBD2	0.000500471	0.00503842	0.492652	-2.02983															SDHD	0.00162477	0.00912344	-2.60783															ZDHHC13
												EMCN	7.3985e-16	1.59063e-14	0.491068	-2.03638															ERGIC3	0.0029209	0.0153102	-2.61334															RPL5
												RAB11FIP1	2.91311e-06	3.98125e-05	0.489359	-2.04349															EIF6	0.00380891	0.0192694	-2.6165															COX7A2L
												NDUFA4L2	0.00587619	0.0448661	0.487791	-2.05006															COTL1	0.0106483	0.0457428	-2.62039															GM16031
												OAS2	3.21212e-10	5.68281e-09	0.48778	-2.0501															PSMA2	6.132e-06	5.40842e-05	-2.62343															D630024D03RIK
												CREB3L3	1.90696e-13	3.82683e-12	0.486942	-2.05363															CDK4	0.000276388	0.00185983	-2.62829															FAM154B
												RPL27-PS3	0.00252678	0.021409	0.486357	-2.0561															SPG21	1.41201e-05	0.000118471	-2.63024															GM27477
												SERPINB8	1.66185e-05	0.000212053	0.486	-2.05761															RP24-427N13.9	2.02686e-34	4.21723e-33	-2.63072															GM10250
												GM3164	9.64645e-08	1.47312e-06	0.485881	-2.05812															NAPA	7.78003e-07	7.51447e-06	-2.6346															EIF3H
												GM10330	2.43851e-11	4.51287e-10	0.485801	-2.05846															FLNC	3.82002e-05	0.000301614	-2.64045															MIR8106
												ESCO2	0.000812791	0.00788416	0.485446	-2.05996															CST7	0.000229925	0.00158132	-2.64649															GM10094
												MAP3K7CL	0.00420295	0.0334626	0.484539	-2.06382															ADH5	4.36854e-06	3.92583e-05	-2.64943															EPHB1
												KCTD13	2.16525e-11	4.01537e-10	0.483946	-2.06635															5830418K08RIK	0.00853172	0.038127	-2.65018															TREML4
												DUSP11	0.00134284	0.0123877	0.483775	-2.06708															CACNG6	3.64894e-05	0.000288863	-2.66659															GM20634
												AKR1B10	0.00268583	0.0225977	0.483497	-2.06826															DBNL	1.28669e-05	0.000108308	-2.67024
												MAPRE3	6.52042e-19	1.54112e-17	0.483327	-2.06899															GM7361	5.16303e-12	6.97704e-11	-2.67782
												SUSD5	4.10785e-08	6.39191e-07	0.481511	-2.0768															NUP188	0.000201121	0.00140242	-2.68233
												DAGLB	0.000212775	0.00232038	0.480851	-2.07965															NDUFA10	9.50104e-06	8.13777e-05	-2.6837
												RBFA	0.00233438	0.0200894	0.478675	-2.0891															SSRP1	1.75495e-08	1.94074e-07	-2.68439
												2700094K13RIK	0.00149875	0.0136587	0.478449	-2.09009															TIMP2	9.89773e-17	1.56571e-15	-2.68781
												PLXNC1	0.00191407	0.0168574	0.478333	-2.09059															SYNM	0.00942788	0.0412649	-2.68974
												GM27200	7.55606e-05	0.000894703	0.477507	-2.09421															OS9	3.1083e-07	3.1275e-06	-2.69734
												EFHD2	0.00476736	0.0372993	0.476563	-2.09836															ABHD12	7.35237e-05	0.000555065	-2.69897
												METTL9	2.39133e-55	1.07825e-53	0.47642	-2.09899															GM10269	1.8675e-38	4.10284e-37	-2.6995
												SORL1	1.19317e-06	1.67109e-05	0.476288	-2.09957															UBE2I	0.000618177	0.00384363	-2.69973
												ANXA4	0.00198322	0.0173902	0.476055	-2.1006															ACTL9	2.26332e-08	2.48471e-07	-2.70308
												BLVRA	8.73264e-05	0.00101999	0.4747	-2.10659															ATP6V0D1	0.000181098	0.0012746	-2.70666
												PSMC3	1.27113e-09	2.17028e-08	0.472973	-2.11428															PSMC5	0.00250258	0.0133282	-2.72176
												PDLIM3	0.000297016	0.00315346	0.472783	-2.11514															2610528A11RIK	0.000705335	0.00432897	-2.72397
												UBAP1	0.00136373	0.0125612	0.471901	-2.11909															DEGS2	1.64885e-09	1.94983e-08	-2.7247
												CITED2	0.00436741	0.0345892	0.470089	-2.12726															SLCO5A1	0.00122061	0.00710782	-2.73124
												AMZ1	4.12752e-11	7.55362e-10	0.470043	-2.12747															PRDX4	1.01535e-05	8.66378e-05	-2.73172
												FAM110A	0.00178174	0.0158698	0.468969	-2.13234															IRGC1	1.69139e-06	1.58047e-05	-2.74113
												CST3	5.1299e-15	1.07979e-13	0.466735	-2.14254															CD36	6.65398e-24	1.22267e-22	-2.74613
												MAN2B2	0.00123144	0.0114831	0.465863	-2.14655															FBXO44	1.07699e-25	2.03268e-24	-2.75119
												FMR1NB	0.00161339	0.0145713	0.465722	-2.1472															NHSL2	0.00238883	0.012813	-2.76093
												KCP	0.00310365	0.0256594	0.464877	-2.1511															MDH1	3.24017e-05	0.00025877	-2.76288
												CAR14	0.000834561	0.00807368	0.46143	-2.16718															SNX5	0.00387787	0.0195581	-2.77332
												CD86	3.03882e-06	4.14366e-05	0.461081	-2.16882															STT3A	0.0022663	0.0122502	-2.78135
												HSPA5	3.46907e-05	0.00042786	0.459482	-2.17636															PSMB1	8.97801e-05	0.000669684	-2.78175
												CCRN4L	0.00499598	0.038886	0.458725	-2.17996															CYB5R4	0.000338207	0.00222692	-2.78544
												FZD2	1.25464e-16	2.75641e-15	0.457791	-2.1844															2810408M09RIK	1.48397e-19	2.5053e-18	-2.7863
												PTGDS	0.000167518	0.00187663	0.456662	-2.1898															UHRF1	6.38201e-34	1.31427e-32	-2.78707
												RNF213	0.00030308	0.00320867	0.455591	-2.19495															BAG1	0.0118097	0.0498438	-2.78757
												VILL	1.1149e-06	1.56493e-05	0.455489	-2.19544															IGBP1	2.50298e-09	2.93681e-08	-2.79336
												IGFBP4	4.48214e-07	6.49892e-06	0.454396	-2.20072															D10JHU81E	5.36201e-69	1.56624e-67	-2.79642
												GM26773	6.07669e-09	9.95223e-08	0.454045	-2.20242															TBC1D10C	3.2526e-09	3.79421e-08	-2.79667
												GM10109	0.000186376	0.00206614	0.454002	-2.20263															TUBB2A	3.49937e-69	1.02715e-67	-2.79792
												9030617O03RIK	4.23288e-05	0.000518177	0.453984	-2.20272															CDS1	8.96298e-06	7.71345e-05	-2.80758
												CXCL12	0.00118059	0.011043	0.453759	-2.20382															EIF3D	3.5256e-08	3.83322e-07	-2.80824
												EIF4G2	2.72239e-06	3.72905e-05	0.452879	-2.20809															DIO3OS	0.00221185	0.0120026	-2.80988
												BLOC1S6	0.00170804	0.0153418	0.452087	-2.21196															IMPDH2	0.000157613	0.00112463	-2.81326
												QPCT	1.96857e-05	0.00024978	0.450791	-2.21832															IFNAR2	0.0039147	0.0197218	-2.81372
												CCDC53	0.00358809	0.0291743	0.448978	-2.22728															SNRPB	0.00121401	0.00707626	-2.81552
												PRKRA	0.00172596	0.0154692	0.448952	-2.22741															GM10505	4.61205e-06	4.13438e-05	-2.82119
												MFSD1	0.000395372	0.00407799	0.446052	-2.24189															4930524B15RIK	1.16211e-12	1.61881e-11	-2.82313
												G430095P16RIK	0.00189837	0.0167355	0.441726	-2.26385															RTCB	1.24597e-05	0.000105076	-2.82634
												TMEM66	0.00508644	0.0394542	0.441416	-2.26544															ART2B	1.04542e-05	8.89517e-05	-2.83087
												SFT2D1	0.00179097	0.0159441	0.441344	-2.26581															AHSA1	4.66764e-06	4.18007e-05	-2.83462
												5031414D18RIK	0.000129406	0.00147528	0.441131	-2.2669															CD53	0.00313625	0.016295	-2.83906
												SCARB2	0.000293308	0.00311775	0.440859	-2.2683															ATP8B5	4.89409e-10	5.9831e-09	-2.84963
												SH3BGRL3	0.000270799	0.00289551	0.440556	-2.26986															METRNL	1.14451e-07	1.19617e-06	-2.8521
												PLK2	0.000501522	0.0050462	0.44017	-2.27185															CDKN3	1.4647e-07	1.51593e-06	-2.86561
												NGP	0.00557606	0.0428295	0.439958	-2.27295															GLRX3	4.501e-05	0.000351545	-2.8772
												RAB11FIP5	7.64493e-06	0.000101192	0.439514	-2.27524															E130012A19RIK	0.000975039	0.00578781	-2.87766
												PLEKHF1	4.20209e-16	9.09916e-15	0.439227	-2.27673															SPTLC2	1.751e-11	2.32451e-10	-2.87782
												FILIP1L	0.00397421	0.0318377	0.438734	-2.27929															RBM44	9.69756e-06	8.30216e-05	-2.88473
												PTPN1	0.00222289	0.0192399	0.438525	-2.28037															TRAPPC1	1.02985e-05	8.77512e-05	-2.88529
												SAMM50	0.0041285	0.0329424	0.438299	-2.28155															CENPF	4.12083e-11	5.37582e-10	-2.88788
												SULF2	0.000724071	0.00711905	0.437894	-2.28366															FAM83F	8.07524e-19	1.33953e-17	-2.8924
												CALM3	0.00473132	0.0370584	0.436056	-2.29328															PSMC2	2.29335e-05	0.000187206	-2.8928
												CYP1A1	0.00141865	0.0130324	0.434913	-2.29931															H6PD	0.000122703	0.000893515	-2.8998
												HFE	1.96952e-08	3.13753e-07	0.434818	-2.29982															KPNA4	1.96388e-08	2.16782e-07	-2.9058
												EBP	0.000725837	0.00713253	0.433566	-2.30645															GM10825	2.06216e-05	0.000169404	-2.91022
												SPG21	0.00262133	0.0221375	0.433551	-2.30653															SERBP1	0.00132798	0.00764557	-2.91187
												PDIA5	4.31728e-79	2.71988e-77	0.432549	-2.31188															RPS28	0.00995987	0.0432791	-2.91463
												WNK1	0.000565917	0.00564518	0.431905	-2.31532															OLFR56	1.47339e-12	2.03828e-11	-2.91686
												GSTT1	9.7059e-11	1.75668e-09	0.430454	-2.32313															RNPEP	8.70799e-14	1.26262e-12	-2.91733
												FNDC5	3.0708e-09	5.13627e-08	0.429917	-2.32603															MNS1	6.18571e-06	5.45048e-05	-2.91857
												HAGHL	1.41643e-09	2.40699e-08	0.428608	-2.33313															MROH1	0.000192459	0.00134721	-2.94941
												NUS1	5.47151e-09	9.01005e-08	0.428336	-2.33462															ZFP467	3.87616e-08	4.19419e-07	-2.96567
												CHST7	8.54098e-05	0.000999543	0.427801	-2.33754															CAMK1	0.000776166	0.00471726	-2.97864
												CNR2	2.64736e-05	0.000331488	0.426464	-2.34486															BLVRB	3.53722e-10	4.3567e-09	-2.99287
												ZFYVE21	0.00122362	0.011416	0.426412	-2.34515															SERPINI1	1.65396e-59	4.42386e-58	-3.00348
												KPNA4	0.00038824	0.0040113	0.426138	-2.34666															HN1	0.00268384	0.0142015	-3.00624
												CTCF	0.00471848	0.0369962	0.425235	-2.35164															RNF130	3.0014e-09	3.50571e-08	-3.02822
												TPM2	4.86338e-37	1.59881e-35	0.423343	-2.36215															2700060E02RIK	2.49288e-05	0.000202579	-3.03725
												DRG2	0.00176711	0.0157472	0.423337	-2.36219															MTHFD1L	0.000936464	0.00559003	-3.05025
												DHCR7	8.29399e-29	2.38038e-27	0.423001	-2.36406															OSBP2	0.000286544	0.00192173	-3.05148
												SLC48A1	0.000319199	0.0033633	0.42264	-2.36608															NTF3	9.13817e-07	8.78868e-06	-3.05534
												DHRS7	0.00348285	0.0284176	0.422597	-2.36632															TRIM58	2.89759e-10	3.5909e-09	-3.09484
												RXRB	0.00583356	0.0445613	0.422199	-2.36855															TPI1	2.95141e-05	0.000236859	-3.09519
												MS4A4A	2.21714e-10	3.95736e-09	0.418448	-2.38978															LACTB	5.1544e-05	0.000399129	-3.09724
												PSMB2	0.00272021	0.0228657	0.417599	-2.39464															MIR6403	0.0089905	0.039745	-3.09885
												LINCHOXA1	2.73865e-08	4.3209e-07	0.417566	-2.39483															HMOX2	6.34116e-11	8.1721e-10	-3.11156
												TPP2	9.74775e-05	0.00113053	0.417456	-2.39546															ARF1	0.000231717	0.0015864	-3.11947
												CHID1	0.000254987	0.00273453	0.417378	-2.39591															TMEM14C	0.000254869	0.00172789	-3.13525
												CES2B	6.77031e-13	1.3364e-11	0.416165	-2.40289															DCTN2	0.00161015	0.00905259	-3.14014
												SEC11C	0.000283385	0.00301938	0.416153	-2.40296															TRAT1	2.89959e-12	3.95977e-11	-3.14681
												CD4	0.000176557	0.00196936	0.414679	-2.4115															EFCAB2	0.00812683	0.0366711	-3.15194
												GNA11	0.00498132	0.0387887	0.414485	-2.41263															TCP1	5.7004e-05	0.000438405	-3.16805
												MTA3	0.000158275	0.00178414	0.414474	-2.41269															SNX2	5.59468e-09	6.4227e-08	-3.17902
												EEPD1	1.0053e-78	6.28959e-77	0.413058	-2.42097															DDAH2	2.58854e-41	5.90207e-40	-3.18195
												4930558J18RIK	0.000548301	0.00549242	0.412229	-2.42584															2021-09-11	2.96012e-07	2.98838e-06	-3.18845
												TTYH3	0.000180025	0.00200187	0.411692	-2.429															NOTCH2	0.00731625	0.0336005	-3.19681
												OSER1	0.000461541	0.00468038	0.411217	-2.4318															CCT3	1.09226e-09	1.30616e-08	-3.19815
												PADI3	3.41828e-07	5.00858e-06	0.410363	-2.43687															TOMM70A	1.96951e-06	1.82994e-05	-3.2279
												MT-ND4	8.38978e-09	1.36294e-07	0.409986	-2.43911															AKR1A1	0.00227631	0.012297	-3.23136
												SORD	0.00404633	0.0323295	0.409857	-2.43987															SLC25A11	1.60213e-08	1.78266e-07	-3.23518
												4933439C10RIK	6.85026e-10	1.18867e-08	0.408824	-2.44604															GNA11	2.15013e-10	2.68856e-09	-3.2627
												PTBP3	0.00591281	0.0450904	0.408065	-2.45059															NUS1	1.64974e-21	2.89882e-20	-3.28823
												ELOF1	0.00288348	0.0240481	0.407763	-2.4524															CCT8	2.72029e-10	3.38045e-09	-3.32279
												TNNC1	1.27881e-11	2.39112e-10	0.40618	-2.46196															RP24-496C19.2	3.36409e-13	4.76321e-12	-3.32489
												ARHGAP4	0.00167619	0.0150782	0.405642	-2.46523															EIF3L	5.61901e-08	6.00102e-07	-3.33018
												SGK1	0.000193759	0.00213749	0.405583	-2.46559															MKI67	1.25802e-16	1.98138e-15	-3.33305
												ZMAT2	0.00183737	0.016285	0.405308	-2.46726															KNG2	4.2855e-11	5.57855e-10	-3.34658
												PLD3	0.00235686	0.020254	0.403586	-2.47779															B230307C23RIK	2.16186e-07	2.2059e-06	-3.34732
												RGS7BP	0.00609064	0.0462515	0.402865	-2.48222															ARHGDIA	1.61696e-05	0.000134481	-3.35808
												ITGB1BP1	4.39397e-05	0.000537533	0.401224	-2.49237															ATP5A1	3.13975e-13	4.46304e-12	-3.38774
												PTRH2	0.00395064	0.0317333	0.400638	-2.49602															THBD	0.00811953	0.0366565	-3.40466
												COLGALT1	9.72971e-16	2.08439e-14	0.400098	-2.49939															VPS35	0.000445826	0.00286562	-3.40865
												MESDC1	0.000126621	0.00144718	0.397602	-2.51508															4930512H18RIK	7.84473e-06	6.81598e-05	-3.49281
												RBM44	0.000201556	0.00221519	0.396866	-2.51974															SNORA2B	3.42191e-09	3.98914e-08	-3.53692
												BLVRB	0.000869207	0.00838641	0.395394	-2.52912															ADAP2	0.000392742	0.00255714	-3.55773
												CSRNP1	0.004415	0.0348897	0.395239	-2.53011															SOX9	0.000951081	0.00566606	-3.56001
												ATP8B5	0.000108647	0.00125291	0.394667	-2.53378															ICOSL	9.64435e-41	2.18521e-39	-3.589
												HERPUD1	0.00059797	0.00594308	0.393746	-2.53971															TKTL1	2.22509e-77	6.9726e-76	-3.64276
												NT5C	0.000300014	0.00318155	0.393156	-2.54352															ALOX5	6.54765e-19	1.09113e-17	-3.66208
												TRIM58	0.000730835	0.00716996	0.393015	-2.54443															KDELR1	7.2295e-06	6.32092e-05	-3.67511
												LDLRAD4	4.11181e-09	6.83952e-08	0.391866	-2.55189															RPL29	1.4589e-42	3.3689e-41	-3.6825
												MAF1	0.00395522	0.031747	0.391747	-2.55267															PPP1CA	4.19616e-07	4.1779e-06	-3.69524
												PRRX2	0.000269872	0.00288731	0.391193	-2.55628															AP2M1	4.75021e-06	4.24561e-05	-3.69811
												SRSF9	0.000193081	0.00213262	0.390442	-2.5612															SYPL2	0.00292203	0.0153102	-3.7119
												PPP1R18	0.000440866	0.0044934	0.390134	-2.56322															EEF1D	2.74953e-07	2.78511e-06	-3.71691
												CST7	0.00373904	0.0302892	0.389938	-2.56451															CD68	4.69855e-05	0.000366025	-3.73245
												COMMD8	0.000152948	0.00172733	0.388842	-2.57174															EIF3F	9.70531e-06	8.30486e-05	-3.73838
												STAT1	0.000411083	0.00422798	0.388153	-2.57631															HEXB	1.82823e-10	2.29558e-09	-3.75882
												PLA2G7	0.00153202	0.0139408	0.388119	-2.57653															VILL	3.39528e-20	5.83556e-19	-3.76496
												FAM110B	0.0013182	0.0122029	0.387966	-2.57755															HEATR1	0.00382662	0.0193377	-3.83163
												CARLR	2.08591e-10	3.7305e-09	0.387255	-2.58228															FKBP5	1.19337e-17	1.92999e-16	-3.85041
												ADAM33	6.02398e-13	1.19299e-11	0.380844	-2.62575															CCL4	8.08388e-18	1.31325e-16	-3.89094
												GM26517	8.35343e-06	0.000109766	0.380576	-2.6276															HLF	7.08351e-07	6.87846e-06	-3.89982
												NAAA	3.04851e-05	0.000379093	0.379486	-2.63514															YWHAH	5.06777e-05	0.000393432	-3.92049
												TES	0.000234825	0.00253485	0.379311	-2.63636															EIF3H	0.00931251	0.0408887	-3.95057
												GM16339	2.75519e-15	5.84701e-14	0.376851	-2.65357															RPL5	3.47581e-07	3.48758e-06	-3.97387
												GM8281	0.00398774	0.0319178	0.376126	-2.65869															TREML4	0.00185861	0.0102895	-4.04715
												SNX5	0.00421156	0.0335059	0.37595	-2.65993															GM26773	1.45011e-32	2.95596e-31	-4.13435
												SIRPB1C	3.89895e-08	6.08256e-07	0.372672	-2.68332															HELB	0.000690925	0.00425208	-4.189
												PTPN2	0.000499333	0.00503257	0.371735	-2.69009															HSPA1B	7.22986e-10	8.75573e-09	-4.19027
												IRF2BPL	0.00328788	0.0269929	0.371628	-2.69086															GM16031	2.30794e-11	3.0482e-10	-4.31376
												TMEM141	5.85601e-05	0.000706355	0.371607	-2.69102															VAT1L	1.1284e-06	1.07665e-05	-4.34728
												EIF4EBP1	2.43855e-08	3.85752e-07	0.371122	-2.69453															GM17056	0.000344219	0.00226321	-4.38796
												PSMA6	8.04097e-22	2.03057e-20	0.368601	-2.71296															ZFP658	3.77141e-05	0.000297907	-4.39776
												POLR3K	0.00302771	0.0250969	0.368269	-2.71541															FADS2	2.12358e-37	4.60942e-36	-4.45516
												GM2A	0.000131886	0.00150165	0.368148	-2.7163															GM5914	0.000874374	0.0052506	-4.706
												MS4A4D	0.000173418	0.00193674	0.366367	-2.7295															KCNK5	4.87369e-45	1.15949e-43	-4.96518
												GM10709	8.39043e-05	0.000984473	0.365517	-2.73585															JPX	0.000218188	0.00150863	-5.71742
												CHMP1A	0.000275784	0.00294533	0.365186	-2.73833															UBE2E3	0.000193853	0.00135383	-7.00303
												E2F4	0.00129151	0.0119691	0.36103	-2.76986															RP24-404O8.1	1.78377e-13	2.56174e-12	-7.81943
												TRAT1	8.53468e-07	1.20748e-05	0.358505	-2.78936
												CTPS2	0.000220873	0.00239712	0.358217	-2.7916
												ATP5H	2.73009e-32	8.25464e-31	0.355931	-2.80953
												MFSD12	0.00173633	0.0155193	0.353724	-2.82706
												FKBP1B	0.00312063	0.0257645	0.352809	-2.83439
												DDR2	2.73581e-06	3.7446e-05	0.352435	-2.83741
												TMEM175	0.00546191	0.0420779	0.352267	-2.83876
												CYP2R1	0.0035885	0.0291743	0.350415	-2.85376
												MGAT5	7.03761e-05	0.000837702	0.349397	-2.86207
												HADH	1.30835e-06	1.82815e-05	0.348597	-2.86864
												NFATC2	0.000491875	0.00496572	0.346557	-2.88553
												ERGIC3	0.00642873	0.0484931	0.345034	-2.89826
												LAMP2	1.04857e-21	2.62956e-20	0.342952	-2.91586
												RBM17	4.61941e-05	0.000563207	0.342778	-2.91734
												RNF130	0.00330938	0.0271492	0.341904	-2.9248
												TMEM255B	7.29806e-10	1.26395e-08	0.341717	-2.92639
												DNAJB13	1.51483e-07	2.26923e-06	0.341086	-2.93181
												GM14812	7.38234e-05	0.000876429	0.332134	-3.01083
												2021-09-11	6.25847e-05	0.000751391	0.331432	-3.01721
												ATP2A2	0.00361166	0.0293494	0.330166	-3.02878
												BC046401	0.00141206	0.0129799	0.329435	-3.0355
												PARP11	0.00434828	0.034483	0.329411	-3.03572
												CSF2RA	3.4569e-07	5.06107e-06	0.327667	-3.05188
												KLF3	0.00043939	0.00448433	0.325529	-3.07193
												FAS	4.82347e-21	1.18819e-19	0.323608	-3.09016
												NECAP2	0.000216634	0.00235961	0.321493	-3.11049
												DHRS3	2.33151e-51	9.80375e-50	0.318829	-3.13648
												MTCH1	0.00615562	0.0466989	0.317529	-3.14932
												GPR84	2.62806e-07	3.87585e-06	0.317402	-3.15057
												IL7R	0.000908697	0.00872552	0.317313	-3.15146
												GGA2	8.1761e-05	0.000961823	0.314444	-3.18022
												LPL	1.47287e-05	0.000188738	0.314385	-3.18081
												GM16133	0.00513086	0.0397647	0.308068	-3.24604
												TPH2	2.12497e-20	5.1642e-19	0.307369	-3.25342
												GM12942	0.00124818	0.0116212	0.306811	-3.25933
												RNF19B	7.1694e-06	9.51762e-05	0.306263	-3.26517
												CCDC109B	3.4186e-05	0.000422211	0.305479	-3.27354
												JUND	8.44993e-06	0.000110954	0.303426	-3.2957
												HPCA	1.22831e-07	1.85694e-06	0.303275	-3.29733
												KRT19	8.42671e-05	0.000988089	0.303155	-3.29864
												0610031J06RIK	8.98894e-05	0.00104857	0.302951	-3.30087
												STRADA	0.00649727	0.0489692	0.301166	-3.32043
												SERPINF1	1.69381e-07	2.52688e-06	0.300932	-3.32301
												WDR89	0.00017937	0.00199581	0.300756	-3.32495
												NXPE2	4.96471e-07	7.1871e-06	0.300133	-3.33185
												AI847159	0.000458042	0.00465011	0.300042	-3.33287
												CENPN	1.74932e-05	0.000222585	0.299113	-3.34322
												NOS1AP	4.76835e-09	7.88806e-08	0.298716	-3.34766
												ROR2	6.65298e-05	0.00079506	0.298474	-3.35038
												PHF11D	3.15567e-23	8.13948e-22	0.298096	-3.35462
												ATXN1	1.73729e-08	2.77982e-07	0.296924	-3.36787
												HAUS7	0.00377354	0.030514	0.292643	-3.41714
												FNBP1	0.000496456	0.00500916	0.29061	-3.44104
												TREML4	0.00107082	0.0100999	0.290159	-3.44639
												SLCO5A1	0.000425838	0.0043599	0.289554	-3.45358
												TMEM252	6.633e-05	0.000793197	0.289357	-3.45594
												SEC23B	0.000931018	0.0089209	0.286438	-3.49115
												TRIM5	0.00604016	0.045926	0.283338	-3.52935
												SYT12	0.00438682	0.0346974	0.282356	-3.54163
												RAP1A	0.000223629	0.00242412	0.280342	-3.56707
												SLC25A23	8.80299e-22	2.21681e-20	0.278358	-3.5925
												ARHGDIB	0.00558157	0.0428355	0.274697	-3.64038
												CUTC	0.00640961	0.048369	0.273948	-3.65033
												RNF150	6.61924e-09	1.08017e-07	0.273338	-3.65848
												ETHE1	2.38519e-05	0.000300181	0.269144	-3.71548
												RAC3	9.54149e-08	1.45956e-06	0.264738	-3.77732
												RP23-329F7.2	0.00637001	0.0481103	0.26361	-3.79348
												RBPJ	0.00116159	0.0108822	0.257908	-3.87735
												PRKRIP1	0.000217502	0.00236622	0.255391	-3.91556
												CIB2	0.00533229	0.0411565	0.248791	-4.01944
												FAM46C	0.000103241	0.00119507	0.244617	-4.08802
												UROS	0.00318565	0.0262533	0.242249	-4.12798
												EDN1	2.41058e-09	4.05826e-08	0.239541	-4.17466
												FLCN	0.00172084	0.0154338	0.238323	-4.19598
												TNIK	1.51086e-14	3.1256e-13	0.238095	-4.20001
												3110040N11RIK	0.0025704	0.0217378	0.238006	-4.20157
												MYBPC3	3.33017e-09	5.55981e-08	0.22854	-4.3756
												PRCP	0.000627134	0.00621667	0.222404	-4.49632
												PPP1R10	0.00073313	0.00718857	0.220547	-4.53418
												HPS3	0.00358669	0.0291743	0.220531	-4.53451
												CEPT1	0.000827042	0.00800522	0.220231	-4.54069
												ZFP467	0.00229267	0.0197681	0.215627	-4.63763
												HEXB	3.54957e-08	5.55189e-07	0.215266	-4.64542
												BB031773	1.25758e-07	1.89486e-06	0.20829	-4.80099
												GM19272	2.80211e-05	0.000349655	0.205152	-4.87443
												NENF	6.23555e-08	9.61988e-07	0.200925	-4.97698
												TNFAIP3	0.00142253	0.0130563	0.194707	-5.13592
												EFCAB4A	8.58221e-05	0.00100307	0.190073	-5.26112
												SRRD	6.04831e-06	8.05298e-05	0.187236	-5.34085
												CDK20	0.0014431	0.0132182	0.185311	-5.39632
												A530064D06RIK	5.00199e-05	0.000607803	0.18168	-5.50419
												GCNT4	0.00435416	0.0345145	0.177106	-5.64634
												TIMP2	4.96689e-10	8.65186e-09	0.170515	-5.8646
												NKIRAS2	0.00479786	0.0375054	0.170062	-5.88021
												2021-09-06	0.00294731	0.0245125	0.167397	-5.97383
												RPL23A-PS3	0.00356843	0.0290503	0.162686	-6.1468
												ARL5C	1.55481e-08	2.49667e-07	0.158702	-6.30113
												ACMSD	6.24849e-08	9.63162e-07	0.137026	-7.2979
												OTOP1	7.286e-07	1.03649e-05	0.136936	-7.30269
												HOXC8	0.00376973	0.0304969	0.131313	-7.61538
												TMEM164	0.00172002	0.0154338	0.124601	-8.02563
												SEC61A1	0.0004104	0.00422336	0.10892	-9.18108
												ZBTB7B	0.00379806	0.0306848	0.10763	-9.29109
												TLR13	0.000262761	0.00281456	0.0670932	-14.9046
												ST6GAL1	0.00145537	0.013317	0.0375521	-26.6297
[truncated: 27 more columns]

## Sheet: cluster distribution
6C	1	2	3	4	5	6	7
NAÏVE	30.3757	17.0809	26.2428	17.5145	7.94798	0	0.83815
SCN	6.77112	22.4398	12.6469	16.4522	4.92445	35.9261	0.839396
DRC	21.5379	30.2725	17.6185	23.143	6.30832	0.261292	0.858529
SCI	33.7026	23.5314	29.8087	4.29674	7.15005	0	1.51057

## Sheet: DEG subclusters
6E
fold 2 FDR 0.05
subcluster	drc	sci	snc
1	346	104	722
2	300	99	617
3	318	57	472
4	779	215	1128
5	604	213	775

## Sheet: GFAP image analysis
6I
%GFAP/TUJ1		Average per mouse
Naive	SNC	DRC	SCI
3.27869	18.9873	24.2424	5.6338
5.40541	37.8788	26.6667	2.12766
5.12821	22.5	30.7692	4
