# Supplementary material for: Profiling sensory neuron microenvironment after peripheral and central axon injury reveals key pathways for neural repair
Source: eLife. 2021 Sep 29;10:e68457. doi: 10.7554/eLife.68457 (PMC8480984; doi:10.7554/eLife.68457)
Supplement: Figure 7—source data 1. — Image analysis for axon regeneration. [file elife-68457-fig7-data1.xlsx]

## Sheet: Regeneration analysis
Regeneration index
distance	Control Diet										Fenofibrate Diet
100	73.0377	72.5633	76.3906	93.2027	81.6546	96.1831	76.935	92.7612	82.4853	85.3619	52.3396	91.0818	86.2953	99.332	97.8432	76.8158	81.3152	87.0044
200	39.8059	48.0006	45.582	72.107	51.5713	48.4545	47.2731	68.9509	58.8698	59.6998	59.0799	69.63	74.7616	95.8495	82.2264	64.5953	78.8127	84.44
300	19.6543	18.3998	18.4805	16.0756	6.30315	43.2243	30.5662	36.945	26.5793	40.4029	28.9165	59.0418	75.4872	80.8022	79.0839	63.2265	71.2452	67.1341
400	15.3685	8.19298	11.9829	8.51064	9.3473	23.2719	32.5071	21.0159	20.0643	22.8864	35.7907	52.3986	69.9301	67.9271	64.7781	62.2422	62.0893	61.6313
800	19.8536	8.16805	9.96374	10.7229	6.3754	20.9575	16.52	32.1997	20.0783	19.245	29.1269	30.6984	39.1841	35.696	30.3262	24.0594	47.0021	43.5873
10 longests axons
Control Diet	Fenofibrate Diet
539.892	407.941
444.113	1007.64
590.581	1032.46
429.892	920.928
325.045	907.599
768.712	838.929
550.248	1279.22
1100.99	1005.66
949.369
762.667

## Sheet: DEG SGC
SGC	Feature ID	Total counts	P-value (DRC vs. NAI)	FDR step up (DRC vs. NAI)	Fold change (DRC vs. NAI)			Feature ID	Total counts	P-value (SCI vs. NAI)	FDR step up (SCI vs. NAI)	Ratio (SCI vs. NAI)	Fold change (SCI vs. NAI)			Feature ID	Total counts	P-value (SNC vs. NAI)	FDR step up (SNC vs. NAI)	Ratio (SNC vs. NAI)	Fold change (SNC vs. NAI)
	GFAP	524619	5.71674e-94	1.16533e-92	7.24872			CIART	66630.2	0.00162677	0.00898672	4.45546	4.45546			GFAP	524619	4.69915e-32	5.07862e-31	6.34282	6.34282
	GLDN	60948.5	0.000286823	0.00126954	6.34399			HIF3A	43619.4	0.00159252	0.00882724	3.14625	3.14625			CCL5	33997.9	6.22379e-29	6.40115e-28	4.54605	4.54605
	PMP2	62182.5	4.20871e-08	2.64596e-07	6.18514			PLP1	4.47396e+07	0	0	3.02881	3.02881			GAP43	210958	1.95226e-05	7.11671e-05	3.74763	3.74763
	CABP1	43545.1	5.11381e-19	5.09999e-18	5.97612			ETNPPL	34921.5	0.0040926	0.020346	2.79487	2.79487			TK1	32089.7	4.73871e-236	1.05779e-234	3.23394	3.23394
	SAA1	53352.4	0	0	5.58442			GPM6B	2.99218e+07	0	0	2.64459	2.64459			CCNB2	34394.4	3.46344e-115	6.13345e-114	3.1082	3.1082
	CXCL14	220209	9.38407e-08	5.75554e-07	5.11388			FAM107A	122093	3.42378e-15	5.41604e-14	2.56765	2.56765			MS4A4B	20366	1.55503e-41	1.87945e-40	3.06713	3.06713
	C1QTNF1	84274.1	1.74344e-23	1.95311e-22	5.06071			SOSTDC1	1.48137e+07	3.24725e-29	7.88101e-28	2.54273	2.54273			PBK	28783.4	7.17996e-76	1.11243e-74	2.93687	2.93687
	C1QL1	26448	8.7566e-09	5.71375e-08	4.91628			SCRG1	66446.4	1.17117e-05	9.44934e-05	2.51598	2.51598			GM4117	31528.9	0.00219876	0.00599995	2.82007	2.82007
	AQP5	34575.1	2.10485e-07	1.26103e-06	4.52026			ZBTB16	30391.7	0.00542289	0.0260497	2.43678	2.43678			VSTM2B	46940.3	0.0176217	0.0401333	2.78012	2.78012
	UCN2	211507	3.24578e-14	2.73344e-13	4.46858			GPX3	174481	2.62524e-29	6.37996e-28	2.26857	2.26857			H2-Q6	86028.2	3.9863e-08	1.91999e-07	2.73211	2.73211
	PLP1	4.47396e+07	0	0	4.42244			MPZ	3.23849e+07	3.02167e-15	4.78833e-14	2.24112	2.24112			APOL6	17070.4	0.00182057	0.00503021	2.70749	2.70749
	GPM6B	2.99218e+07	0	0	4.14518			MICAL2	104369	1.46087e-08	1.60182e-07	2.12358	2.12358			GAL	52754.1	3.94067e-06	1.5574e-05	2.67276	2.67276
	SPIDR	290801	9.28292e-11	6.76247e-10	4.13819			MMD2	9.46401e+06	5.72558e-75	1.89953e-73	2.10875	2.10875			IL18BP	131982	3.73138e-21	3.28626e-20	2.66625	2.66625
	CLCA2	36041.4	4.17631e-10	2.94393e-09	3.97056			GYPA	15992.8	0.00048317	0.00298673	2.08245	2.08245			KLHDC8A	24577.9	0.00466801	0.0120111	2.64405	2.64405
	MMD2	9.46401e+06	1.72911e-99	3.61853e-98	3.70605			FBLN5	5.59303e+06	2.43332e-51	7.27222e-50	2.0803	2.0803			VASH1	32454.2	0.0143576	0.0334106	2.60903	2.60903
	THBS2	167064	2.98479e-14	2.51951e-13	3.64527			CD84	36328.6	2.32894e-92	7.99042e-91	2.07508	2.07508			PLP1	4.47396e+07	0	0	2.56505	2.56505
	FCGR2B	764571	0.00215407	0.00835073	3.62744			EGFL8	5.1639e+06	2.53553e-20	4.66378e-19	2.03991	2.03991			GM11127	24209.7	0.0119347	0.0282672	2.56157	2.56157
	CCDC80	45072.1	0.000163171	0.00074521	3.54087			ADM	35383	1.71265e-15	2.7404e-14	2.02511	2.02511			XLR4B	20719.6	0.0155227	0.0358266	2.43644	2.43644
	MAMSTR	67005	0.000422757	0.00182999	3.51749			SFRP5	9.13901e+06	1.89473e-25	3.8235e-24	2.00997	2.00997			AURKB	23047.1	6.10666e-113	1.07721e-111	2.32363	2.32363
	GALNT6	159515	1.56925e-17	1.48475e-16	3.50141			C1S1	179438	0.00589098	0.0280194	0.496177	-2.01541			GBP4	31180.6	9.94236e-07	4.18213e-06	2.30209	2.30209
	SOSTDC1	1.48137e+07	9.22619e-130	2.46409e-128	3.49621			TMCC3	51295.3	6.13401e-07	5.77351e-06	0.493755	-2.0253			SPDL1	18861.1	1.65089e-06	6.80102e-06	2.2969	2.2969
	MBP	1.89047e+07	6.50209e-120	1.66522e-118	3.48471			PDGFA	727832	0.00527088	0.0254379	0.492757	-2.0294			BIN2	55612.4	0	0	2.25532	2.25532
	ALDOC	5.06871e+06	1.09998e-18	1.08504e-17	3.46752			HRCT1	82026.4	3.00011e-08	3.21928e-07	0.489925	-2.04113			LGI3	66597.2	0.0131699	0.0309293	2.25222	2.25222
	MPZ	3.23849e+07	5.51225e-78	1.03389e-76	3.42397			ARHGAP18	44226	3.75061e-09	4.29208e-08	0.488979	-2.04508			TRBC2	17229.9	4.01061e-06	1.58262e-05	2.23119	2.23119
	HMGCS2	6.0504e+06	2.47582e-55	4.12204e-54	2.97408			ADRB2	110642	5.50022e-16	8.99182e-15	0.487303	-2.05211			UBE2C	44401.3	1.31728e-111	2.31241e-110	2.2231	2.2231
	CMTM5	5.36763e+06	7.24502e-90	1.44588e-88	2.96006			ATP5L	1.14298e+06	4.56721e-14	6.89313e-13	0.484522	-2.06389			SPC25	26481.4	5.40788e-64	7.86012e-63	2.21708	2.21708
	FBLN5	5.59303e+06	2.57525e-81	4.91172e-80	2.94748			DHRS3	586313	6.6053e-05	0.000474873	0.481646	-2.07621			DOCK8	23380.1	3.56294e-138	6.64139e-137	2.2117	2.2117
	TMEM202	55555.7	6.70791e-05	0.000320862	2.92472			ETL4	44202.3	0.0108142	0.0475398	0.481354	-2.07747			2810417H13RIK	36524.6	1.89933e-162	3.69665e-161	2.20216	2.20216
	CMKLR1	40207.3	0.0085382	0.0290023	2.86461			NGFR	346208	0.00894607	0.0404183	0.480818	-2.07979			SKA1	15497.7	1.25568e-66	1.85489e-65	2.16818	2.16818
	SFRP5	9.13901e+06	9.18905e-39	1.30312e-37	2.84751			STX11	58338.4	0.000187077	0.00124679	0.475891	-2.10132			NXPE5	27438.2	0	0	2.16286	2.16286
	TNFSF11	16535	0.000114497	0.000533014	2.79347			LGALS3	2.80926e+06	8.25805e-17	1.39807e-15	0.468866	-2.1328			IFI204	36175.4	0	0	2.11866	2.11866
	PAQR6	5.153e+06	5.1583e-40	7.43164e-39	2.76497			ANK3	764206	0.00185954	0.0101181	0.465426	-2.14857			CMKLR1	40207.3	1.39607e-73	2.13737e-72	2.1115	2.1115
	TUBB3	383837	0.00705966	0.0244954	2.74447			H2-T23	327196	0.00976845	0.0436107	0.460482	-2.17164			NKG7	18836.2	0.0178696	0.0406415	2.10492	2.10492
	AQP1	61664.7	1.08448e-38	1.53551e-37	2.68537			UBA52	1.78609e+06	1.85246e-23	3.62493e-22	0.46003	-2.17377			SOSTDC1	1.48137e+07	9.54663e-43	1.16788e-41	2.10196	2.10196
	PLEKHB1	5.54686e+06	1.23882e-114	3.11099e-113	2.68006			RASSF4	360254	2.32055e-08	2.50795e-07	0.458833	-2.17944			H2-Q7	1.04119e+06	0.00596119	0.0150369	2.09607	2.09607
	MMP17	190574	8.65371e-29	1.07909e-27	2.67227			NFIL3	112910	2.80151e-07	2.7351e-06	0.45671	-2.18958			LBP	107407	5.9147e-78	9.29946e-77	2.04857	2.04857
	PTN	3.09848e+06	4.27507e-32	5.58508e-31	2.65758			BC005764	42659.7	3.76386e-06	3.24068e-05	0.452897	-2.20801			SLC1A2	137955	7.663e-05	0.000259758	2.02755	2.02755
	TUBB2B	465585	2.33494e-12	1.83158e-11	2.6506			LYPD2	22127.2	7.94584e-07	7.41325e-06	0.446267	-2.24081			SERPINA3F	13942.7	8.68729e-17	6.77924e-16	2.02648	2.02648
	CRTAC1	28057.1	6.79346e-06	3.60107e-05	2.62583			CDC42EP3	442377	6.14997e-06	5.1409e-05	0.446181	-2.24124			IIGP1	286021	0.000370534	0.00114484	2.01939	2.01939
	EGFL8	5.1639e+06	7.1051e-70	1.29113e-68	2.58407			GABRA3	20196.8	0.0104193	0.0460951	0.444385	-2.2503			LRRC52	19463.5	0.0117374	0.0278729	2.01807	2.01807
	TMOD1	53606.6	0.00257297	0.00981269	2.58218			ATF3	2.42549e+06	4.86597e-09	5.53344e-08	0.44067	-2.26927			WFDC13	24599.1	0.00342365	0.00903035	2.01324	2.01324
	PMP22	1.6018e+07	1.53052e-49	2.43174e-48	2.57858			ADAM19	63644.5	0.00711617	0.0330765	0.434544	-2.30126			CCNB1	23215.6	2.81702e-69	4.206e-68	2.00115	2.00115
	SEMA3B	4.71606e+06	8.75323e-93	1.77629e-91	2.53871			BTG2	2.37712e+06	3.15285e-16	5.2061e-15	0.431137	-2.31945			PLD3	1.14497e+06	2.66941e-15	1.97003e-14	0.499018	-2.00393
	FDPS	8.66262e+06	2.3994e-18	2.33496e-17	2.53799			CYBA	1.6951e+06	1.81079e-25	3.65821e-24	0.430891	-2.32077			BAD	1.54312e+06	1.25696e-09	6.80859e-09	0.499009	-2.00397
	SLC1A2	137955	2.14771e-10	1.53672e-09	2.52056			FOSB	245828	3.15543e-07	3.05916e-06	0.426016	-2.34733			YIF1B	1.65744e+06	4.03243e-08	1.94169e-07	0.498807	-2.00478
	TTYH1	3.95653e+06	7.11423e-48	1.11178e-46	2.48806			CSRNP1	208901	5.01772e-13	7.28718e-12	0.421343	-2.37336			SSRP1	1.20441e+06	3.48141e-12	2.21802e-11	0.498541	-2.00585
	TMOD2	4.1665e+06	3.40601e-76	6.35542e-75	2.48207			NTRK3	98704.4	7.2928e-05	0.000518934	0.414607	-2.41192			SMARCB1	1.93402e+06	1.03309e-07	4.813e-07	0.498415	-2.00636
	SLC22A17	2.52961e+06	4.58066e-21	4.83214e-20	2.47339			RINL	52458.7	2.0344e-05	0.00015821	0.412484	-2.42434			PSMC6	1.59628e+06	2.45585e-10	1.3898e-09	0.4982	-2.00722
	TSPAN15	4.36104e+06	4.19534e-45	6.42847e-44	2.43203			CEBPB	2.24619e+06	1.05088e-26	2.17153e-25	0.405496	-2.46612			FYB	381203	3.53942e-127	6.40604e-126	0.497905	-2.00841
	PCSK2	21547.5	0.000239161	0.00107116	2.41588			PTPLAD2	85036.4	7.04342e-41	1.92085e-39	0.401698	-2.48943			TXNDC5	901129	2.01199e-20	1.73646e-19	0.497209	-2.01123
	PHGDH	6.4182e+06	2.7064e-46	4.18243e-45	2.37498			CHD5	55647.5	0.00137303	0.00771708	0.394805	-2.5329			NANS	506013	1.50055e-51	1.9979e-50	0.4971	-2.01167
	HMGCS1	6.1479e+06	6.86024e-07	3.95536e-06	2.37213			ACVRL1	268721	0.00353878	0.017943	0.394529	-2.53467			SNRPA	1.56422e+06	1.58274e-09	8.52727e-09	0.496889	-2.01252
	FSTL4	14725.4	4.45336e-05	0.000216048	2.36806			C3	108750	4.63093e-18	8.09003e-17	0.390215	-2.56269			ADRB2	110642	2.40307e-17	1.90821e-16	0.496698	-2.01329
	GDA	21108.3	4.89601e-206	1.56404e-204	2.32321			ADGB	44725.9	0.00117713	0.00672684	0.380925	-2.62519			CEPT1	929250	4.3887e-22	3.9518e-21	0.496348	-2.01472
	CYP2J6	3.79897e+06	5.60142e-62	9.73839e-61	2.30922			KLF2	1.55202e+06	2.49063e-13	3.67317e-12	0.377366	-2.64995			SF3B4	1.91504e+06	5.69583e-06	2.20716e-05	0.496174	-2.01542
	CRLF1	738416	2.37416e-95	4.88364e-94	2.30914			MKI67	52328	0.0021918	0.0117056	0.374479	-2.67037			DNAJB1	1.24659e+06	2.20629e-09	1.17305e-08	0.495697	-2.01736
	ACSBG1	3.00009e+06	5.46437e-09	3.62042e-08	2.30863			NRN1	535296	0.00032874	0.00210108	0.362617	-2.75773			TMEM55B	1.46384e+06	6.52811e-12	4.09417e-11	0.495405	-2.01855
	IGKC	16107.1	0.00783162	0.0268494	2.3083			LPCAT2	571137	4.12092e-07	3.93691e-06	0.359073	-2.78495			TEX261	2.08331e+06	0.000346868	0.00107687	0.495137	-2.01964
	NPPC	57541.7	4.70779e-05	0.000228086	2.28854			RNASE4	433402	1.34873e-70	4.42585e-69	0.355177	-2.8155			ASNA1	1.64544e+06	1.92432e-08	9.50129e-08	0.49445	-2.02245
	S100B	3.82383e+06	5.44968e-05	0.000262482	2.28765			EMP1	344754	8.44619e-05	0.000593531	0.354728	-2.81906			C1D	1.85446e+06	1.71518e-09	9.21062e-09	0.494337	-2.02291
	LGI3	66597.2	1.11253e-05	5.77206e-05	2.2712			FCGR2B	764571	1.63961e-15	2.62818e-14	0.350516	-2.85293			SEC13	1.75686e+06	3.0689e-08	1.49163e-07	0.493522	-2.02625
	NKAIN4	2.03322e+06	3.43958e-24	3.89913e-23	2.25762			CADM2	320173	0.00129975	0.00734628	0.343228	-2.91351			KLF2	1.55202e+06	0.000500112	0.00151746	0.493101	-2.02798
	EDNRB	5.80454e+06	1.47634e-09	1.01382e-08	2.24723			SCN7A	1.60909e+06	5.48149e-08	5.73226e-07	0.342966	-2.91574			LGALS9	542838	6.49724e-89	1.05549e-87	0.492691	-2.02967
	CLCA4	16706.7	0.000284566	0.00126016	2.24404			ALDH1A1	315501	0.000167908	0.00112818	0.256319	-3.9014			ZFAND5	1.38071e+06	4.15947e-10	2.32121e-09	0.492268	-2.03141
	TVP23A	102494	3.86723e-07	2.27319e-06	2.23842			GFRA3	414354	0.000155703	0.00105008	0.247855	-4.03462			UBALD2	1.42937e+06	6.26699e-11	3.67304e-10	0.492138	-2.03195
	TSPAN7	3.89632e+06	1.48527e-06	8.3453e-06	2.22736											ADRM1	1.94113e+06	4.05513e-06	1.59845e-05	0.491886	-2.03299
	EPYC	27763	1.27544e-20	1.32841e-19	2.22091											DAZAP1	1.48798e+06	5.39951e-09	2.79497e-08	0.491559	-2.03434
	DHH	3.46058e+06	2.56926e-57	4.3497e-56	2.21008											RPL27-PS3	156052	9.24866e-08	4.32218e-07	0.491527	-2.03448
	ME1	2.65166e+06	3.2703e-12	2.55092e-11	2.20299											2210016F16RIK	1.08998e+06	4.12341e-19	3.44685e-18	0.491457	-2.03476
	KIF21A	1.51441e+06	2.0651e-13	1.68726e-12	2.20044											CLPTM1L	1.47585e+06	4.63689e-08	2.21974e-07	0.491372	-2.03512
	CCL8	68670.6	8.4079e-179	2.55931e-177	2.19809											PPP1R18	1.2458e+06	2.13936e-15	1.58402e-14	0.490496	-2.03875
	LYSMD2	4.61117e+06	5.95736e-68	1.07286e-66	2.19574											HNRNPM	1.99479e+06	2.12684e-10	1.21043e-09	0.490294	-2.03959
	GAP43	210958	0.000295862	0.00130698	2.18767											TSG101	1.98558e+06	8.53709e-08	4.00205e-07	0.490289	-2.03961
	TMEM252	19790.2	1.324e-290	4.6037e-289	2.18674											SPOP	2.19755e+06	5.91966e-06	2.29143e-05	0.490222	-2.03989
	CLCF1	38508.1	1.35181e-10	9.77289e-10	2.1716											ATP2B1	804300	5.14234e-25	4.95094e-24	0.490216	-2.03992
	CADM1	5.87348e+06	3.0251e-85	5.91957e-84	2.16641											MAN2B1	432208	4.32535e-74	6.63893e-73	0.490081	-2.04048
	SCD1	5.69127e+06	9.12659e-19	9.03712e-18	2.15768											SMARCE1	985930	1.30978e-18	1.07891e-17	0.489869	-2.04136
	ST6GALNAC5	25358.4	0.00754781	0.0259749	2.15691											ANXA1	234001	3.00827e-27	3.01343e-26	0.489671	-2.04219
	SCG3	1.95705e+06	3.33305e-23	3.7086e-22	2.1523											POLR2M	2.27956e+06	5.15708e-05	0.000177983	0.489133	-2.04443
	EMP2	3.77419e+06	2.25675e-42	3.35011e-41	2.14872											MFF	3.03367e+06	9.01928e-05	0.000302724	0.488938	-2.04525
	LECT1	2.1046e+06	3.90091e-13	3.15581e-12	2.13865											2700094K13RIK	420203	2.18852e-32	2.37234e-31	0.488787	-2.04588
	RAB3B	239171	7.33635e-32	9.55681e-31	2.13171											LGALS3BP	654163	3.47302e-66	5.09705e-65	0.488089	-2.04881
	FBLN7	78526.4	8.13149e-09	5.32508e-08	2.11137											GRPEL1	1.47892e+06	2.18223e-10	1.24093e-09	0.487956	-2.04937
	JAM3	3.76796e+06	2.5254e-50	4.04803e-49	2.104											WBP2	2.19747e+06	0.00587471	0.0148394	0.487823	-2.04992
	SEMA4F	26783	0.000256013	0.00114211	2.08452											PDCL3	1.55284e+06	2.90471e-12	1.85912e-11	0.48682	-2.05415
	ADAMTS2	59467.9	2.73521e-29	3.4344e-28	2.0702											KHDRBS1	1.58237e+06	3.14031e-11	1.87889e-10	0.486448	-2.05572
	MAL	3.40008e+06	7.2268e-58	1.22808e-56	2.06992											SFT2D1	1.30229e+06	3.13557e-20	2.68948e-19	0.486223	-2.05667
	ATP8B1	47327.5	1.9013e-14	1.61752e-13	2.06691											PRDX3	1.66607e+06	1.52214e-12	9.91418e-12	0.486069	-2.05732
	GSN	2.31194e+07	6.60576e-172	1.96769e-170	2.05234											MRPL12	2.22991e+06	1.7214e-07	7.83206e-07	0.485893	-2.05806
	ASPA	5.60237e+06	4.23112e-92	8.55738e-91	2.04469											RTFDC1	981476	4.43185e-19	3.69955e-18	0.485844	-2.05827
	SOX2	2.03759e+06	1.75659e-23	1.96662e-22	2.03189											PAICS	1.85602e+06	5.76198e-09	2.97494e-08	0.485769	-2.05859
	WIF1	24737.5	0	0	2.02492											ELOF1	1.71336e+06	1.38125e-11	8.44299e-11	0.48563	-2.05918
	GAMT	3.46019e+06	2.59683e-45	3.98247e-44	2.02433											G3BP1	2.33867e+06	5.00974e-06	1.95218e-05	0.485584	-2.05938
	SPHK1	206678	4.45482e-08	2.79485e-07	2.02066											SPTSSA	7.02564e+06	7.11114e-08	3.35534e-07	0.485519	-2.05965
	CYP2J9	2.66263e+06	2.40215e-25	2.80577e-24	2.00453											ZC3H12A	60484.3	1.24106e-23	1.15848e-22	0.485028	-2.06174
	ATP5L	1.14298e+06	0.0117138	0.0383831	-2.01002											TXNL1	2.60117e+06	0.000240327	0.000761808	0.484832	-2.06257
	ARHGAP15	66414.4	9.94085e-44	1.50159e-42	-2.01173											SLC48A1	917911	3.74102e-14	2.63606e-13	0.484736	-2.06298
	NFKBIZ	289413	3.74801e-18	3.62201e-17	-2.01192											APRT	1.43939e+06	5.71418e-15	4.17447e-14	0.484561	-2.06372
	AGT	181881	3.932e-06	2.12794e-05	-2.01332											STX4A	1.81859e+06	9.62848e-08	4.49619e-07	0.484337	-2.06468
	ZFP36	3.6065e+06	4.34247e-11	3.22052e-10	-2.01727											IMP3	1.4493e+06	3.67211e-09	1.92562e-08	0.484308	-2.0648
	GM2000	151011	2.54714e-38	3.58403e-37	-2.01759											NDUFV1	2.23015e+06	7.33392e-08	3.45684e-07	0.484205	-2.06524
	IFI27L2A	2.8407e+06	2.66039e-05	0.000132186	-2.0186											STARD3NL	3.3072e+06	8.03664e-06	3.06433e-05	0.48319	-2.06958
	SNRPG	259603	4.28191e-19	4.27977e-18	-2.01948											RAB8A	1.03666e+06	1.98075e-18	1.62128e-17	0.483152	-2.06974
	OSTF1	2.57673e+06	1.11735e-12	8.88033e-12	-2.01971											HEXA	2.95348e+06	0.015474	0.0357371	0.482662	-2.07184
	DAB2	183603	5.00887e-242	1.67714e-240	-2.02242											SLBP	527891	5.62642e-35	6.29916e-34	0.482502	-2.07253
	UBE2D3	6.25355e+06	0.000363704	0.00158499	-2.03196											ACP1	1.98727e+06	1.56186e-09	8.41728e-09	0.48245	-2.07275
	CTSA	2.98536e+06	5.97038e-06	3.17875e-05	-2.03348											CTBP1	2.81062e+06	0.00172826	0.00479715	0.482361	-2.07314
	CRISPLD1	82799.3	8.41083e-29	1.04952e-27	-2.03575											SUGT1	1.18103e+06	6.95997e-18	5.618e-17	0.482256	-2.07359
	CCT4	2.80321e+06	2.30862e-11	1.73709e-10	-2.04312											EIF4A3	1.88266e+06	1.54912e-06	6.39928e-06	0.482064	-2.07441
	CMPK1	1.61625e+06	1.12341e-15	1.00258e-14	-2.04546											MSN	1.6093e+06	1.94002e-15	1.43819e-14	0.481849	-2.07534
	PLA2G7	656194	1.24297e-27	1.51442e-26	-2.05											NAAA	1.18475e+06	2.10243e-17	1.67463e-16	0.481817	-2.07548
	PLTP	346174	2.31125e-82	4.43627e-81	-2.05403											PTP4A2	2.3822e+06	1.70028e-08	8.44349e-08	0.481811	-2.0755
	ACTR3	3.07403e+06	2.58581e-08	1.64569e-07	-2.05734											ATG3	1.83766e+06	2.80336e-11	1.68062e-10	0.481093	-2.0786
	5031414D18RIK	20338.6	0.000184329	0.000836349	-2.06928											OSGEP	1.54325e+06	1.27943e-16	9.90298e-16	0.48093	-2.07931
	ARL4D	23113.8	0.00206421	0.00803787	-2.0793											MTFR1L	1.98049e+06	1.76102e-05	6.46387e-05	0.480873	-2.07955
	RAPGEF3	21502.2	0.000147956	0.000681055	-2.08527											BNIP2	1.46737e+06	5.69953e-14	3.97275e-13	0.480713	-2.08024
	GPC3	281322	1.3811e-20	1.4368e-19	-2.08703											RPL10-PS3	258368	1.21702e-08	6.11248e-08	0.480051	-2.08311
	ITGB1	1.9851e+06	0.000190319	0.0008618	-2.08805											PIGT	1.61503e+06	1.83762e-06	7.53422e-06	0.479616	-2.085
	GM9843	181548	1.51585e-28	1.88113e-27	-2.08932											SAMM50	1.26149e+06	1.73221e-18	1.42106e-17	0.478948	-2.08791
	UNC93B1	1.15859e+06	7.47144e-43	1.11278e-41	-2.09349											SH3BGRL3	2.27233e+06	2.44213e-20	2.10268e-19	0.47883	-2.08842
	COL14A1	158745	6.47578e-40	9.30012e-39	-2.09802											TUBB2A	1.43856e+06	2.79927e-26	2.76124e-25	0.478796	-2.08857
	NRP2	565429	4.86831e-06	2.61044e-05	-2.10627											RPL13-PS3	167151	0.00419318	0.0108823	0.478583	-2.0895
	MRPL52	595025	2.20301e-13	1.7975e-12	-2.10652											MGAT2	1.0709e+06	7.93113e-24	7.42635e-23	0.478509	-2.08982
	IGFBP3	213642	0.00193461	0.00757957	-2.12181											PPP2R1A	2.00531e+06	1.46439e-08	7.30419e-08	0.478302	-2.09073
	TMCC3	51295.3	4.39381e-09	2.9229e-08	-2.12187											HDAC1	1.7197e+06	4.95887e-09	2.57573e-08	0.477591	-2.09384
	ANGPTL7	38160	1.2524e-10	9.07967e-10	-2.12871											BMP2K	101759	3.79829e-26	3.7365e-25	0.476521	-2.09854
	PNP	823196	5.62693e-31	7.23103e-30	-2.1321											THOC7	1.35958e+06	5.86729e-09	3.02758e-08	0.476485	-2.0987
	RRAD	90982.8	0.000346453	0.0015131	-2.133											GM16286	1.74526e+06	2.63372e-07	1.17784e-06	0.476416	-2.099
	IRF2BP2	115277	1.0592e-20	1.10573e-19	-2.13321											SOCS3	6.05397e+06	8.64326e-08	4.04762e-07	0.476347	-2.09931
	SH3BGRL	2.40472e+06	7.85024e-22	8.50451e-21	-2.13832											MTCH2	2.19892e+06	1.2936e-08	6.48452e-08	0.47623	-2.09982
	VEGFA	84835.1	0.000331029	0.00144993	-2.14068											NDUFA10	2.33796e+06	8.19719e-08	3.8487e-07	0.476062	-2.10057
	FOSB	245828	4.26909e-10	3.00582e-09	-2.14796											9530068E07RIK	2.39235e+06	0.00119057	0.00340181	0.475827	-2.10161
	MPEG1	79784.7	1.13464e-229	3.75741e-228	-2.16052											GM10116	831928	8.51513e-26	8.29537e-25	0.475327	-2.10382
	RASL11A	155889	9.78465e-06	5.09845e-05	-2.1718											RAB11A	2.29966e+06	1.72982e-11	1.04956e-10	0.47439	-2.10797
	GADD45G	939113	3.97437e-23	4.41675e-22	-2.17279											CDK2AP2	2.048e+06	2.7596e-13	1.86111e-12	0.473795	-2.11062
	PTPLAD2	85036.4	2.93424e-136	8.0021e-135	-2.17849											MAP1LC3B	5.2617e+06	0.000253298	0.000801097	0.473704	-2.11102
	TRIM30A	44579.1	6.50076e-33	8.54838e-32	-2.19029											ARRB2	597261	2.68952e-55	3.67846e-54	0.473373	-2.1125
	VMP1	1.36929e+06	1.91253e-14	1.62579e-13	-2.21694											PSMB2	7.37637e+06	3.40287e-10	1.90841e-09	0.473331	-2.11269
	ADAMTS1	323440	1.19452e-40	1.73759e-39	-2.21708											ARF6	1.24945e+06	8.76482e-19	7.25626e-18	0.473324	-2.11272
	MKI67	52328	2.13528e-06	1.1814e-05	-2.23654											ATF4	1.68827e+06	2.66933e-07	1.19289e-06	0.472678	-2.1156
	PCP4	76622.7	0.00541909	0.0193221	-2.24565											SEC11C	2.22924e+06	1.5848e-22	1.43994e-21	0.472308	-2.11726
	CTSC	5.73325e+06	7.12609e-13	5.69867e-12	-2.24661											EID1	2.9804e+06	0.000947728	0.00275319	0.472217	-2.11767
	ADCYAP1R1	32169.6	5.05889e-07	2.94779e-06	-2.24888											ZFP207	1.8862e+06	9.32664e-10	5.09779e-09	0.472015	-2.11858
	ETL4	44202.3	0.000271519	0.00120504	-2.26136											CCL4	181271	7.81178e-42	9.47952e-41	0.471081	-2.12278
	D630003M21RIK	29498.2	9.36026e-10	6.48689e-09	-2.26483											2310009B15RIK	197600	0.00165055	0.00459768	0.47074	-2.12432
	CD302	1.31528e+06	2.98588e-42	4.41797e-41	-2.26899											ACO2	1.61669e+06	1.1826e-13	8.13024e-13	0.470669	-2.12463
	SERP1	2.30916e+06	2.78758e-17	2.61694e-16	-2.28967											MRPL28	2.08764e+06	1.37696e-07	6.32702e-07	0.470443	-2.12566
	SNHG11	97627.4	1.57203e-08	1.0126e-07	-2.30969											CLTC	1.17737e+06	2.02507e-18	1.6568e-17	0.470402	-2.12584
	NAP1L5	53551.3	0.00941994	0.0316348	-2.3127											TCN2	2.6533e+06	7.30608e-10	4.01523e-09	0.470138	-2.12704
	XBP1	2.04266e+06	6.44163e-13	5.16502e-12	-2.32156											SDF2	2.10859e+06	2.68008e-08	1.31005e-07	0.469701	-2.12901
	ADRB2	110642	1.67823e-09	1.14722e-08	-2.32451											MED10	1.00464e+06	4.6344e-19	3.86507e-18	0.46947	-2.13006
	IER3	566321	7.15934e-24	8.07032e-23	-2.32933											BUD31	1.71606e+06	2.81332e-10	1.58614e-09	0.469284	-2.13091
	MSN	1.6093e+06	3.32367e-21	3.52879e-20	-2.34297											ADPRH	2.4396e+06	2.69795e-07	1.20478e-06	0.469283	-2.13091
	LGALS9	542838	7.31613e-43	1.09054e-41	-2.36517											TPD52L2	1.78493e+06	3.71846e-09	1.94766e-08	0.468627	-2.13389
	DCN	2.3119e+07	3.88544e-06	2.104e-05	-2.45545											DNAJA2	1.97391e+06	2.58344e-08	1.26383e-07	0.468482	-2.13455
	CSRNP1	208901	1.32429e-12	1.04836e-11	-2.49159											PSMB6	5.32507e+06	8.78246e-06	3.33254e-05	0.468276	-2.13549
	LGALS3	2.80926e+06	0.0152339	0.0484427	-2.51066											TGFBI	1.06789e+06	1.70865e-163	3.3291e-162	0.467466	-2.13919
	KLF2	1.55202e+06	7.23128e-11	5.31067e-10	-2.56016											HNRNPDL	2.18158e+06	4.80529e-08	2.29671e-07	0.46736	-2.13968
	FXYD5	671569	6.52996e-94	1.3296e-92	-2.56352											HMGN1	8.44733e+06	0.00158747	0.00443497	0.467114	-2.14081
	LGMN	5.69521e+06	8.78518e-11	6.41538e-10	-2.63837											MAF1	1.75876e+06	1.99944e-06	8.16069e-06	0.466809	-2.1422
	NRXN2	42112.5	5.27596e-08	3.28494e-07	-2.6585											CCL12	126991	2.79778e-98	4.7189e-97	0.466461	-2.1438
	CYBA	1.6951e+06	5.35602e-21	5.63364e-20	-2.72933											TMEM261	546043	1.72606e-29	1.79259e-28	0.465923	-2.14628
	GPRC5C	124230	0.000247824	0.00110722	-2.84463											ERP44	1.55921e+06	7.28525e-15	5.30079e-14	0.465887	-2.14644
	LYZ2	8.8596e+06	1.12804e-15	1.00622e-14	-2.84794											EIF4EBP1	628517	2.11925e-34	2.36095e-33	0.465537	-2.14806
	GM10073	526908	1.83505e-19	1.8536e-18	-2.90086											APOA1BP	2.54535e+06	6.6927e-11	3.91367e-10	0.465422	-2.14859
	BTG2	2.37712e+06	9.57622e-20	9.7274e-19	-3.05038											FLOT1	1.73415e+06	8.07146e-07	3.42904e-06	0.465353	-2.14891
	H2-T23	327196	9.30645e-05	0.000437975	-3.13088											RAB24	1.62641e+06	9.48411e-12	5.85064e-11	0.465083	-2.15015
	ETV4	131793	1.22456e-21	1.3195e-20	-3.14364											DGKH	21131.5	0.0220411	0.0490129	0.464598	-2.1524
	IGFBP7	3.89297e+06	8.66983e-06	4.54506e-05	-3.39587											TMEM109	1.90191e+06	1.14685e-08	5.76488e-08	0.464256	-2.15399
	MYOC	74655.4	2.93263e-35	3.94825e-34	-3.53223											SCAMP2	1.51099e+06	1.3377e-15	9.99046e-15	0.463994	-2.1552
	LY6E	1.47907e+06	4.6603e-105	1.12953e-103	-3.53468											UBE2E1	2.23851e+06	4.0054e-09	2.09251e-08	0.463441	-2.15777
	SPP1	527348	2.11147e-33	2.78871e-32	-3.67019											SSU72	2.04301e+06	1.64685e-12	1.06841e-11	0.462874	-2.16042
	CEBPB	2.24619e+06	1.12867e-44	1.7207e-43	-3.83655											POMP	3.23557e+06	6.13268e-19	5.09114e-18	0.462866	-2.16045
	NT5DC2	267585	6.77646e-85	1.32174e-83	-3.92516											TXNIP	1.26903e+06	6.79533e-13	4.5006e-12	0.462364	-2.1628
																NDUFV2	4.38367e+06	1.18417e-14	8.53024e-14	0.462217	-2.16349
																TM2D2	2.62822e+06	3.30492e-05	0.00011678	0.461156	-2.16846
																ITGB5	915285	8.03109e-31	8.52672e-30	0.461071	-2.16886
																NFKBIA	2.07385e+06	1.3209e-13	9.06384e-13	0.460863	-2.16984
																CSF2RA	876418	2.9541e-36	3.33623e-35	0.460826	-2.17002
																BCAS2	3.38537e+06	1.61924e-06	6.67369e-06	0.460304	-2.17248
																CNN2	776369	7.08325e-34	7.83796e-33	0.460226	-2.17284
																IFNGR2	830400	5.91782e-41	7.10492e-40	0.459822	-2.17475
																ETFA	1.78145e+06	1.04555e-12	6.86691e-12	0.459585	-2.17588
																SAR1A	1.83925e+06	6.52797e-09	3.357e-08	0.459561	-2.17599
																BSCL2	1.37372e+06	1.83006e-17	1.46219e-16	0.45948	-2.17637
																TPR	1.6733e+06	9.00167e-12	5.56442e-11	0.459227	-2.17757
																DDX39B	3.03424e+06	3.88336e-07	1.70881e-06	0.458941	-2.17893
																PSMD2	1.86241e+06	1.69386e-13	1.15529e-12	0.458418	-2.18142
																MSRB1	1.3132e+06	6.25652e-17	4.9099e-16	0.458197	-2.18247
																SRP54B	1.71083e+06	3.60417e-16	2.73581e-15	0.458062	-2.18311
																NSMCE1	2.25625e+06	3.02786e-08	1.47327e-07	0.458057	-2.18313
																IFI27L2A	2.8407e+06	2.50288e-15	1.84939e-14	0.457828	-2.18422
																TBRG1	1.26974e+06	4.47685e-13	2.99135e-12	0.457786	-2.18443
																POLR2E	2.34025e+06	7.93809e-06	3.03123e-05	0.457545	-2.18558
																ECHS1	2.76692e+06	2.85919e-06	1.14729e-05	0.457367	-2.18643
																TSPAN31	2.71449e+06	9.4655e-06	3.57298e-05	0.456614	-2.19003
																PSMA3	5.16145e+06	6.2636e-07	2.70034e-06	0.455483	-2.19547
																CNDP2	643097	6.34294e-57	8.76809e-56	0.454879	-2.19839
																RAB2A	4.19262e+06	1.34757e-07	6.203e-07	0.454758	-2.19897
																PSMA7	5.86255e+06	4.35103e-08	2.08787e-07	0.454692	-2.19929
																BMYC	2.01289e+06	9.39864e-15	6.80836e-14	0.45455	-2.19998
																TMEM219	1.66991e+06	1.07904e-13	7.43244e-13	0.453502	-2.20506
																EBP	1.37968e+06	3.6758e-18	2.98304e-17	0.452545	-2.20972
																IGBP1	1.14984e+06	2.24157e-23	2.07845e-22	0.452234	-2.21124
																NOL7	2.65169e+06	5.59354e-08	2.6587e-07	0.451875	-2.213
																SNX6	2.13612e+06	9.76645e-11	5.66529e-10	0.45137	-2.21548
																ETV4	131793	6.19437e-19	5.13999e-18	0.450904	-2.21777
																GRINA	3.11668e+06	1.70944e-08	8.48667e-08	0.450706	-2.21874
																BUB3	2.28656e+06	2.44097e-08	1.19672e-07	0.450391	-2.22029
																NDUFA9	1.54128e+06	1.22205e-17	9.81164e-17	0.449978	-2.22233
																ABRACL	530743	2.20977e-46	2.79992e-45	0.449968	-2.22238
																EHD1	708749	2.90525e-38	3.36514e-37	0.4499	-2.22272
																ADIPOR1	2.38198e+06	3.20608e-10	1.80084e-09	0.448242	-2.23094
																G530011O06RIK	183819	1.5568e-286	3.67954e-285	0.447705	-2.23362
																TPD52	1.16554e+06	8.69005e-25	8.33995e-24	0.446969	-2.23729
																FAM32A	2.11714e+06	1.22424e-09	6.6373e-09	0.446062	-2.24184
																DBNL	1.59674e+06	2.45559e-15	1.81519e-14	0.446033	-2.24199
																SQSTM1	1.85012e+06	6.60699e-08	3.12479e-07	0.445819	-2.24306
																PSMC4	2.71904e+06	1.17876e-05	4.40538e-05	0.445327	-2.24554
																ATP6V0B	5.97853e+06	6.54202e-07	2.81433e-06	0.44453	-2.24957
																RHOG	972683	5.78579e-38	6.67599e-37	0.444477	-2.24984
																CD52	165198	3.40577e-169	6.75958e-168	0.444209	-2.25119
																PSMB5	3.97692e+06	6.56241e-07	2.82109e-06	0.444118	-2.25165
																PPP2R4	1.57819e+06	1.13953e-12	7.47057e-12	0.443988	-2.25231
																H2-EB1	4.31349e+06	1.06181e-10	6.14947e-10	0.443986	-2.25232
																CTSS	2.40176e+06	1.83096e-76	2.84657e-75	0.443154	-2.25655
																PDRG1	2.11984e+06	1.24531e-08	6.24936e-08	0.442504	-2.25987
																NTAN1	2.38903e+06	1.50848e-09	8.13688e-09	0.440832	-2.26844
																CREG1	1.14739e+06	2.07397e-23	1.92502e-22	0.439314	-2.27627
																ADH5	2.36488e+06	3.7507e-11	2.22933e-10	0.439226	-2.27673
																NFE2L2	1.67493e+06	2.3664e-18	1.93169e-17	0.438901	-2.27842
																RAMP1	44560.3	1.4371e-270	3.33988e-269	0.438894	-2.27845
																RRP1	2.35444e+06	4.17672e-10	2.33012e-09	0.438629	-2.27983
																RPL36-PS3	103244	7.30928e-14	5.07134e-13	0.437415	-2.28616
																H2-AA	5.04826e+06	2.74611e-06	1.10461e-05	0.437249	-2.28702
																MRPL24	1.78397e+06	1.73016e-12	1.12125e-11	0.437218	-2.28719
																LUM	3.09647e+06	5.32224e-13	3.54443e-12	0.437164	-2.28747
																EIF3D	1.49593e+06	8.98823e-20	7.64063e-19	0.43657	-2.29059
																EIF2S1	1.08191e+06	5.40233e-35	6.05577e-34	0.436446	-2.29123
																CTSD	7.40373e+06	2.86835e-08	1.39716e-07	0.434847	-2.29966
																TNFAIP8	500266	5.36401e-118	9.55535e-117	0.434712	-2.30037
																NAPA	2.62644e+06	8.46382e-10	4.6374e-09	0.434551	-2.30122
																HMGB2	1.09444e+06	7.78836e-33	8.51398e-32	0.434431	-2.30186
																PIM1	145504	2.46107e-126	4.42773e-125	0.433223	-2.30828
																CXCL16	376516	0	0	0.431923	-2.31523
																METRNL	2.84621e+06	2.89304e-11	1.73324e-10	0.431754	-2.31614
																PSMD13	2.04676e+06	3.42128e-10	1.91814e-09	0.431628	-2.31681
																PCBP2	4.51528e+06	2.59734e-09	1.37559e-08	0.431275	-2.3187
																NUDT21	1.04348e+06	1.60175e-27	1.61164e-26	0.430952	-2.32044
																DEK	2.02689e+06	3.59989e-13	2.41072e-12	0.430866	-2.32091
																EMG1	1.8972e+06	3.18829e-10	1.79196e-09	0.430853	-2.32097
																PLEKHJ1	1.60485e+06	2.14097e-18	1.75004e-17	0.429638	-2.32754
																TMEM134	2.17806e+06	4.68842e-13	3.13041e-12	0.429281	-2.32948
																DERL1	1.72284e+06	1.0356e-13	7.13868e-13	0.428855	-2.33179
																MRPL18	1.95614e+06	1.58038e-14	1.13302e-13	0.428287	-2.33488
																PSMC5	2.68559e+06	6.82652e-09	3.50157e-08	0.427468	-2.33936
																NAP1L1	2.36183e+06	4.18512e-18	3.39028e-17	0.427372	-2.33988
																ATXN10	2.91936e+06	1.80863e-10	1.03291e-09	0.426667	-2.34375
																BST2	3.28979e+06	1.07997e-06	4.52536e-06	0.426363	-2.34542
																C1QBP	2.46328e+06	3.55079e-11	2.11412e-10	0.42635	-2.34549
																SDF2L1	1.32728e+06	2.52156e-44	3.13781e-43	0.426105	-2.34684
																TWF2	740291	1.97872e-59	2.78205e-58	0.424122	-2.35781
																TYROBP	320153	3.3811e-149	6.4419e-148	0.423837	-2.3594
																SPG21	1.42099e+06	5.37876e-23	4.93171e-22	0.423826	-2.35946
																ANAPC5	2.40387e+06	6.39778e-07	2.7549e-06	0.423778	-2.35973
																GRB2	1.05314e+06	6.308e-29	6.48408e-28	0.423453	-2.36154
																CFDP1	2.37369e+06	1.89027e-11	1.14461e-10	0.423337	-2.36218
																PNRC1	1.87122e+06	4.65272e-09	2.4188e-08	0.42321	-2.36289
																HNRNPA2B1	8.05722e+06	1.14504e-15	8.58e-15	0.423043	-2.36382
																HSPA1A	1.55927e+07	0.00289672	0.00774099	0.422726	-2.3656
																PYCARD	394013	9.14804e-102	1.55456e-100	0.422167	-2.36873
																RNPEP	902564	1.63176e-46	2.06899e-45	0.422099	-2.36911
																ACAT1	2.19618e+06	3.58533e-12	2.27964e-11	0.421203	-2.37415
																EIF3K	3.77613e+06	2.20322e-17	1.75182e-16	0.420956	-2.37554
																COMMD3	1.87114e+06	8.1199e-12	5.05565e-11	0.420394	-2.37872
																PTPN1	929677	3.20581e-47	4.11095e-46	0.418844	-2.38752
																VASP	1.05293e+06	1.44791e-41	1.75115e-40	0.418299	-2.39064
																GLUD1	1.4828e+06	3.21341e-18	2.61248e-17	0.417984	-2.39244
																CSNK2B	2.20744e+06	1.45497e-13	9.94982e-13	0.417789	-2.39355
																ATP6V1E1	2.78709e+06	1.07073e-10	6.1991e-10	0.417322	-2.39623
																CCT3	2.42198e+06	7.08772e-12	4.43436e-11	0.417262	-2.39658
																DNAJB11	2.20843e+06	1.90498e-12	1.2319e-11	0.416092	-2.40332
																SDHC	2.83815e+06	2.00042e-12	1.29269e-11	0.415236	-2.40827
																IMPDH2	1.95402e+06	2.99484e-12	1.91477e-11	0.414745	-2.41112
																MLF2	7.11777e+06	5.63523e-05	0.000193672	0.414504	-2.41252
																PLA2G7	656194	6.88547e-38	7.9398e-37	0.414479	-2.41267
																SNX17	2.54151e+06	3.84009e-08	1.85302e-07	0.414474	-2.41269
																MAPRE1	3.06539e+06	1.42747e-07	6.54748e-07	0.413908	-2.416
																SRSF7	2.24776e+06	2.64317e-16	2.02077e-15	0.412756	-2.42274
																ACAA1A	3.26168e+06	3.73851e-06	1.48269e-05	0.412386	-2.42491
																MAP2K2	2.94573e+06	4.94948e-07	2.15642e-06	0.411171	-2.43208
																IDH3B	1.86869e+06	8.11402e-18	6.53494e-17	0.411004	-2.43307
																LY6E	1.47907e+06	1.29998e-85	2.08747e-84	0.409826	-2.44006
																EIF4E2	902767	1.41622e-44	1.77454e-43	0.409704	-2.44079
																PA2G4	2.13598e+06	2.19788e-11	1.32511e-10	0.409576	-2.44155
																OS9	1.72337e+06	3.38632e-17	2.67722e-16	0.409324	-2.44305
																CHMP2A	4.14534e+06	1.42876e-10	8.20889e-10	0.408505	-2.44795
																CDK4	3.07998e+06	2.65927e-09	1.40633e-08	0.40832	-2.44906
																VMP1	1.36929e+06	2.31465e-15	1.7117e-14	0.408098	-2.45039
																CCT8	2.0393e+06	5.02923e-23	4.61358e-22	0.40805	-2.45068
																POLD4	808187	3.89988e-47	4.99035e-46	0.406841	-2.45796
																LIMD2	528637	1.32014e-146	2.4968e-145	0.406625	-2.45927
																C1QC	2.19079e+06	5.05044e-58	7.0298e-57	0.406262	-2.46147
																PPT1	3.43858e+06	5.7464e-10	3.17836e-09	0.406163	-2.46206
																CCT2	1.69271e+06	1.40401e-22	1.27696e-21	0.405998	-2.46307
																COTL1	5.25111e+06	0.000929912	0.00270796	0.404795	-2.47039
																NONO	2.96174e+06	4.82146e-11	2.84985e-10	0.404557	-2.47184
																ILK	2.56059e+06	5.39925e-08	2.56837e-07	0.404467	-2.47239
																HMGN2	3.57676e+06	3.66367e-13	2.45162e-12	0.404307	-2.47337
																HPRT	1.75212e+06	6.65835e-24	6.25076e-23	0.403794	-2.47651
																SYS1	2.70979e+06	8.07025e-11	4.704e-10	0.402467	-2.48467
																APOD	1.98745e+07	3.92685e-08	1.89337e-07	0.402337	-2.48548
																KXD1	1.53238e+06	1.83955e-18	1.50843e-17	0.401683	-2.48953
																SPAG7	2.13259e+06	8.82719e-14	6.10576e-13	0.401546	-2.49038
																NUPR1	122930	1.32604e-59	1.86585e-58	0.401199	-2.49253
																PSMC2	2.40259e+06	3.14599e-12	2.00928e-11	0.400478	-2.49701
																COPZ1	2.21814e+06	1.03456e-14	7.47934e-14	0.399982	-2.50011
																SIN3B	2.20778e+06	1.23289e-16	9.54688e-16	0.399398	-2.50377
																HFE	1.00622e+06	6.16456e-51	8.14776e-50	0.399345	-2.5041
																HNRNPC	3.39003e+06	2.46527e-12	1.58347e-11	0.398308	-2.51062
																FH1	1.02315e+06	1.87581e-37	2.15479e-36	0.398207	-2.51125
																IFNGR1	2.11145e+06	1.84337e-17	1.47217e-16	0.397921	-2.51306
																IER5	1.09546e+06	1.78009e-38	2.0765e-37	0.397832	-2.51362
																D17WSU104E	2.65542e+06	1.07074e-12	7.02723e-12	0.39657	-2.52162
																TGFB1	508713	5.09375e-122	9.10981e-121	0.396233	-2.52377
																EFHD2	810346	2.23011e-75	3.44932e-74	0.395947	-2.52559
																ZFP36	3.6065e+06	4.78608e-22	4.30533e-21	0.395239	-2.53012
																KLF6	4.20301e+06	2.77659e-06	1.11638e-05	0.394802	-2.53292
																RAB7	5.30388e+06	7.48798e-11	4.37024e-10	0.394688	-2.53365
																BIN1	746139	3.2973e-77	5.15285e-76	0.393806	-2.53932
																CAMP	118077	2.85971e-05	0.000101968	0.393254	-2.54288
																AKR1B3	1.867e+06	4.0869e-22	3.68371e-21	0.392802	-2.54581
																FCER1G	483765	1.55269e-112	2.73628e-111	0.392435	-2.54819
																UBE2L3	2.15909e+06	1.14188e-17	9.17204e-17	0.392085	-2.55047
																WDR1	2.56259e+06	9.93505e-18	7.99447e-17	0.39011	-2.56338
																SERPINB6A	2.00465e+06	1.77936e-10	1.01651e-09	0.389884	-2.56487
																PSMA2	5.422e+06	3.85814e-13	2.57985e-12	0.389825	-2.56526
																CALM3	6.71214e+06	8.87969e-19	7.34463e-18	0.388701	-2.57267
																RTCB	1.88701e+06	1.65896e-20	1.43657e-19	0.388595	-2.57337
																PSMB10	4.46208e+06	9.49527e-09	4.81582e-08	0.388476	-2.57416
																PPP4C	1.96011e+06	1.97402e-19	1.66397e-18	0.388403	-2.57465
																FAM49B	1.40776e+06	2.82616e-39	3.33332e-38	0.388336	-2.57509
																SUMO3	2.76106e+06	1.86404e-08	9.22128e-08	0.388242	-2.57572
																SH3BGRL	2.40472e+06	1.00482e-18	8.29214e-18	0.388067	-2.57688
																ABHD12	2.13764e+06	1.94537e-18	1.59304e-17	0.38765	-2.57965
																LPCAT2	571137	7.54411e-52	1.00594e-50	0.387474	-2.58082
																EIF6	2.46461e+06	6.79948e-12	4.2555e-11	0.386992	-2.58403
																GPRC5C	124230	7.15745e-09	3.66507e-08	0.386559	-2.58693
																NTPCR	662767	1.5788e-129	2.87764e-128	0.385857	-2.59163
																GUSB	1.33986e+06	1.46714e-36	1.66211e-35	0.385669	-2.5929
																SDHD	2.4424e+06	2.93012e-18	2.38454e-17	0.385427	-2.59453
																SSBP4	1.75209e+06	3.64393e-20	3.12255e-19	0.385375	-2.59487
																LEPROT	2.79223e+06	1.11424e-09	6.0555e-09	0.385168	-2.59627
																COMMD8	1.43304e+06	6.20492e-35	6.93394e-34	0.38472	-2.59929
																EWSR1	2.89604e+06	1.59862e-12	1.03861e-11	0.38471	-2.59936
																RNASE4	433402	5.49618e-214	1.18871e-212	0.384647	-2.59978
																COPE	4.61419e+06	2.31194e-08	1.13531e-07	0.383911	-2.60477
																D630024D03RIK	35096.5	0.0204104	0.0457866	0.38365	-2.60654
																EPN1	1.23052e+06	7.24626e-32	7.81274e-31	0.383399	-2.60825
																IDH2	1.83142e+06	3.6169e-22	3.26333e-21	0.38337	-2.60844
																IDH3G	2.73361e+06	2.65721e-13	1.7934e-12	0.382311	-2.61567
																CSRNP1	208901	3.34326e-09	1.75725e-08	0.382179	-2.61658
																AHSA1	2.32984e+06	7.98398e-17	6.23847e-16	0.381726	-2.61968
																CMTM7	851470	1.14457e-89	1.87116e-88	0.381254	-2.62292
																BLVRB	1.5434e+06	3.0791e-25	2.97558e-24	0.380975	-2.62484
																CMPK1	1.61625e+06	4.57871e-23	4.21097e-22	0.38075	-2.6264
																MTCH1	7.35701e+06	7.86289e-05	0.000266184	0.380631	-2.62721
																M6PR	3.21071e+06	8.21857e-11	4.78891e-10	0.379946	-2.63195
																DHRS3	586313	2.26591e-37	2.59796e-36	0.37859	-2.64138
																FAM195B	2.89582e+06	6.64127e-09	3.41042e-08	0.37849	-2.64208
																UBE2D3	6.25355e+06	3.33549e-07	1.47563e-06	0.377415	-2.64961
																IL10RB	1.63532e+06	5.9057e-33	6.46374e-32	0.376666	-2.65487
																GM2000	151011	3.69626e-08	1.78504e-07	0.37655	-2.65569
																HMOX2	1.13681e+06	2.66833e-45	3.35042e-44	0.375741	-2.66141
																NUCB1	1.78823e+06	3.15142e-21	2.77819e-20	0.374755	-2.66841
																XBP1	2.04266e+06	2.31826e-21	2.05271e-20	0.372788	-2.68249
																PLIN2	2.07532e+06	1.56739e-20	1.35989e-19	0.372459	-2.68486
																RP23-395C1.4	146111	0.00298521	0.0079528	0.370802	-2.69686
																RGS10	363389	4.81735e-225	1.05964e-223	0.37055	-2.69869
																SNX2	2.66892e+06	3.68037e-17	2.90462e-16	0.369849	-2.70381
																CMTM3	1.72252e+06	1.96751e-30	2.0707e-29	0.369218	-2.70843
																UFC1	2.48846e+06	3.61452e-16	2.74252e-15	0.369096	-2.70932
																C3	108750	1.31873e-74	2.031e-73	0.36856	-2.71326
																ATP6V0D1	2.39797e+06	5.18617e-21	4.552e-20	0.366778	-2.72645
																RNF130	2.28138e+06	7.84753e-21	6.86127e-20	0.366299	-2.73001
																SLC25A11	2.02984e+06	4.20331e-22	3.78675e-21	0.36611	-2.73142
																IFI30	541797	4.42966e-181	9.02962e-180	0.365465	-2.73624
																H13	2.44239e+06	1.77348e-19	1.49633e-18	0.365441	-2.73642
																NECAP2	1.74114e+06	2.93062e-26	2.88923e-25	0.365359	-2.73704
																GLRX3	2.81325e+06	5.78014e-15	4.21925e-14	0.364897	-2.7405
																FAM96A	2.53241e+06	1.05272e-19	8.91537e-19	0.364254	-2.74534
																FXYD5	671569	5.24967e-79	8.28267e-78	0.361711	-2.76464
																TAPBP	3.68037e+06	6.38905e-10	3.52411e-09	0.361612	-2.76539
																DAP	1.20179e+06	2.46672e-37	2.82642e-36	0.361174	-2.76875
																PRR13	2.67489e+06	2.83909e-17	2.2495e-16	0.360613	-2.77306
																RASSF4	360254	2.43485e-45	3.05939e-44	0.358293	-2.79101
																SNRPB	6.07315e+06	8.08492e-10	4.43652e-09	0.357654	-2.796
																SNX5	2.32107e+06	1.41472e-26	1.40393e-25	0.357056	-2.80068
																PRDX4	3.17974e+06	5.67022e-16	4.28072e-15	0.357017	-2.80099
																GM20634	88745.3	0.00387314	0.0101185	0.356073	-2.80841
																0610031J06RIK	3.50786e+06	6.54405e-19	5.42517e-18	0.355747	-2.81099
																P4HB	1.65329e+06	1.55689e-28	1.58861e-27	0.355678	-2.81153
																SERP1	2.30916e+06	6.064e-20	5.17185e-19	0.355235	-2.81504
																EIF3L	2.32735e+06	4.02302e-19	3.36604e-18	0.354212	-2.82317
																TRF	1.96665e+06	2.49464e-69	3.72773e-68	0.354049	-2.82447
																PSMB1	5.79371e+06	7.9699e-18	6.4246e-17	0.352069	-2.84035
																H2AFY	2.72802e+06	1.93629e-20	1.67272e-19	0.349857	-2.85831
																EPHB1	80556.3	0.00207517	0.00568502	0.349623	-2.86022
																LITAF	3.36811e+06	3.65054e-08	1.76438e-07	0.349124	-2.86431
																VDAC2	6.32844e+06	1.4042e-07	6.44563e-07	0.346947	-2.88228
																FOSB	245828	1.83237e-06	7.51782e-06	0.346742	-2.88399
																UBE2I	2.75248e+06	4.39681e-18	3.56018e-17	0.346689	-2.88443
																GLTP	3.833e+06	9.21298e-07	3.89478e-06	0.34617	-2.88875
																MDH1	7.19477e+06	3.89164e-16	2.94783e-15	0.343886	-2.90794
																LMAN2	1.57369e+06	1.64311e-33	1.80712e-32	0.343766	-2.90895
																NT5DC2	267585	1.805e-61	2.58197e-60	0.343703	-2.90949
																UNC93B1	1.15859e+06	1.32561e-82	2.10618e-81	0.343355	-2.91244
																MIA	80541.9	0.00416245	0.0108088	0.341215	-2.9307
																TNFSF9	207863	3.00268e-09	1.58331e-08	0.340339	-2.93825
																2700060E02RIK	7.33421e+06	2.31051e-10	1.31166e-09	0.338876	-2.95094
																TNFRSF1A	1.61756e+06	4.61542e-33	5.0546e-32	0.338743	-2.95209
																SLC10A6	34139.3	0.0224907	0.049884	0.338728	-2.95222
																BAG1	2.93146e+06	3.77943e-21	3.32697e-20	0.335842	-2.97759
																OSTF1	2.57673e+06	8.8219e-21	7.70202e-20	0.333563	-2.99793
																DCTN2	4.00133e+06	2.45766e-09	1.30314e-08	0.333469	-2.99878
																ATP5A1	7.26987e+06	3.42533e-23	3.15826e-22	0.333365	-2.99971
																CCT4	2.80321e+06	2.71797e-23	2.51374e-22	0.332776	-3.00502
																SYNGR2	1.67703e+06	1.20156e-47	1.54849e-46	0.332648	-3.00618
																SERBP1	5.41271e+06	4.72813e-17	3.71692e-16	0.332641	-3.00624
																TCP1	2.06573e+06	5.66917e-25	5.45526e-24	0.330986	-3.02127
																TPI1	9.08097e+06	1.05124e-08	5.31382e-08	0.327693	-3.05164
																CORO1B	1.69782e+06	4.7946e-37	5.46948e-36	0.327213	-3.05612
																PHB2	3.92151e+06	3.31717e-11	1.98077e-10	0.326757	-3.06038
																PPP1CC	2.49191e+06	9.44784e-22	8.41509e-21	0.326334	-3.06435
																ERGIC3	6.5448e+06	3.36229e-16	2.55543e-15	0.325625	-3.07102
																TSIX	101697	0.000283888	0.000892693	0.325545	-3.07177
																SDHB	4.02695e+06	7.80547e-18	6.29486e-17	0.325454	-3.07263
																HN1	3.56586e+06	3.2238e-15	2.37335e-14	0.325059	-3.07637
																ALDH1A1	315501	0.00241964	0.00654247	0.324543	-3.08126
																RNH1	3.0487e+06	3.52779e-23	3.25107e-22	0.322228	-3.10339
																PITPNA	2.46376e+06	1.1e-30	1.16311e-29	0.321857	-3.10697
																IFNAR2	2.89448e+06	4.88051e-23	4.48169e-22	0.319998	-3.12502
																TMEM14C	3.05851e+06	3.72404e-25	3.59308e-24	0.316937	-3.1552
																RPS26-PS1	97435.4	0.00908385	0.0221086	0.315909	-3.16547
																CAMK1	2.95732e+06	4.77019e-22	4.29317e-21	0.314521	-3.17944
																CYBA	1.6951e+06	3.01262e-37	3.44101e-36	0.312038	-3.20474
																ARF1	7.77555e+06	7.48979e-13	4.95148e-12	0.306689	-3.26064
																CD302	1.31528e+06	1.11177e-63	1.60943e-62	0.301259	-3.3194
																BTG2	2.37712e+06	8.69868e-22	7.75164e-21	0.300147	-3.3317
																H2-AB1	1.22499e+07	0.000147451	0.000481498	0.296976	-3.36728
																EEF1D	7.78275e+06	1.16573e-11	7.15466e-11	0.29685	-3.36871
																BRK1	5.77569e+06	3.68697e-19	3.0863e-18	0.290922	-3.43734
																KDELR1	3.54499e+06	1.38145e-22	1.25707e-21	0.289787	-3.4508
																EIF3F	8.77074e+06	5.62763e-11	3.30904e-10	0.287354	-3.48003
																RAC1	7.14276e+06	2.1181e-14	1.51134e-13	0.28707	-3.48347
																CEBPB	2.24619e+06	1.76932e-21	1.56896e-20	0.286601	-3.48917
																PPP1CA	7.54313e+06	1.0332e-18	8.52246e-18	0.285269	-3.50547
																PRELID1	2.92017e+06	5.10356e-22	4.58635e-21	0.284406	-3.5161
																ACTR3	3.07403e+06	2.42831e-31	2.59801e-30	0.28265	-3.53795
																PNP	823196	1.49484e-96	2.49338e-95	0.28111	-3.55732
																CTSA	2.98536e+06	1.43039e-23	1.33383e-22	0.280727	-3.56219
																EIF3M	3.12188e+06	2.5662e-26	2.53272e-25	0.279551	-3.57716
																YWHAH	5.36792e+06	4.67419e-14	3.27955e-13	0.276582	-3.61557
																CTSC	5.73325e+06	1.80741e-22	1.64055e-21	0.273681	-3.65388
																ARHGDIA	7.74653e+06	1.33023e-16	1.02918e-15	0.273666	-3.65409
																AKR1A1	9.91554e+06	4.50772e-11	2.66877e-10	0.272542	-3.66916
																GM10269	48475.9	0.0221381	0.0492045	0.271449	-3.68393
																COX7A2L	8.14716e+06	8.40079e-13	5.53754e-12	0.271412	-3.68444
																HEXB	2.62627e+06	3.19431e-43	3.929e-42	0.268311	-3.72702
																AP2M1	7.69509e+06	1.07339e-14	7.75191e-14	0.26772	-3.73524
																C1QB	3.7715e+06	6.4628e-57	8.92696e-56	0.263196	-3.79945
																C1QA	3.89616e+06	1.8909e-42	2.30698e-41	0.259765	-3.84963
																RPL5	9.03632e+06	2.33081e-17	1.85164e-16	0.252974	-3.95298
																ATF3	2.42549e+06	1.80963e-14	1.29328e-13	0.248809	-4.01915
																ERP29	3.40176e+06	1.14809e-41	1.39132e-40	0.237052	-4.21848
																EIF3H	7.49085e+06	6.09414e-21	5.33857e-20	0.225694	-4.43079
																LGMN	5.69521e+06	2.24802e-22	2.03333e-21	0.214652	-4.6587
																DCN	2.3119e+07	2.86646e-05	0.000102186	0.203466	-4.91483
																LYZ2	8.8596e+06	2.69512e-14	1.91475e-13	0.190086	-5.26078

## Sheet: Ppara expression
Ppara%	connective	Endothelial	Imoonglia	Macrophage	Mesencymal	Neurons	Pericytes	Schwann	sgc	Smooth muscle	n/a
snc	2.64463	0	2.80374	0.076746	0	0	1.14943	0.564972	3.63738	0.571429	0
sci	1.53649	0.25974	3.52113	0	0.347222	0.909091	1.72414	0.438596	3.75965	1.09489	0.597015
nai	1.04603	0.407332	7.35294	0	0	1.92308	0.574713	1.40845	3.87283	0.456621	0
drc	2.80289	0.165289	2.39521	0	0	0	0	1.13636	2.42628	0.434783	1
